# Supplementary material for: Underrepresentation of women in the senior levels of Brazilian science
Source: PeerJ. 2017 Dec 19;5:e4000. doi: 10.7717/peerj.4000 (PMC5741063; doi:10.7717/peerj.4000)
Supplement: Supplemental Information 1 — Raw dataset. [file peerj-05-4000-s001.xlsx]

## Sheet: Brazilian Academy Sciences
Academy	NameMember	Subarea	LevelCNPqPQ	Area	Gender
Brazilian Academy of Sciences	Abraham Hirsz Zimerman	CA FA - Física e Astronomia	1A	Exact Sciences	Male
Brazilian Academy of Sciences	Abrahão Iachan	Sem Bolsa	SEM	Exact Sciences	Male
Brazilian Academy of Sciences	Abramo Hefez	CA MA - Matemática e Estatística	1B	Exact Sciences	Male
Brazilian Academy of Sciences	Adalberto Fazzio	CA FA - Física e Astronomia	1A	Exact Sciences	Male
Brazilian Academy of Sciences	Adalberto Luis Val	CA AQ - Aqüicultura e Recursos Pesqueir	1A	Life Sciences	Male
Brazilian Academy of Sciences	Adalberto Ramón Vieyra	CA BF - Biofísica, Bioquímica, Farmaco	1B	Life Sciences	Male
Brazilian Academy of Sciences	Adán José Corcho Fernández	CA MA - Matemática e Estatística	2	Exact Sciences	Male
Brazilian Academy of Sciences	Adelmar Faria Coimbra-Filho	Sem Bolsa	SEM	Life Sciences	Male
Brazilian Academy of Sciences	Ademar Freire Maia	Sem Bolsa	SEM	Life Sciences	Male
Brazilian Academy of Sciences	Ademir Neves	CA QU - Química	1A	Exact Sciences	Male
Brazilian Academy of Sciences	Adeney de Freitas Bueno	CA AG - Agronomia	2	Exact Sciences	Male
Brazilian Academy of Sciences	Ado Jório de Vasconcelos	CA FA - Física e Astronomia	1A	Exact Sciences	Male
Brazilian Academy of Sciences	Adolfo Jose da Mota	Pós-doutorado Júnior do CNPq	Pós-Doutorado	Exact Sciences	Male
Brazilian Academy of Sciences	Adolpho José Melfi	CA GC - Geociências	1A	Exact Sciences	Male
Brazilian Academy of Sciences	Adrian Antonio Garda	Sem Bolsa	SEM	Life Sciences	Male
Brazilian Academy of Sciences	Adriano Alonso Veloso	CA CC - Ciências da Computação	2	Exact Sciences	Male
Brazilian Academy of Sciences	Adriano Defini Andricopulo	CA QU - Química	1B	Exact Sciences	Male
Brazilian Academy of Sciences	Adriano Nunes Nesi	CA BO - Botânica	1D	Life Sciences	Male
Brazilian Academy of Sciences	Aécio Pereira Chagas	Sem Bolsa	SEM	Exact Sciences	Male
Brazilian Academy of Sciences	Affonso Augusto Guidão Gomes	Sem Bolsa	SEM	Exact Sciences	Male
Brazilian Academy of Sciences	Alain Meunier	Sem Bolsa	SEM	Exact Sciences	Male
Brazilian Academy of Sciences	Alain Sarasin	Sem Bolsa	SEM	Life Sciences	Male
Brazilian Academy of Sciences	Alaor Silvério Chaves	CA FA - Física e Astronomia	SR	Exact Sciences	Male
Brazilian Academy of Sciences	Albert Fishlow	Sem Bolsa	SEM	Humanities	Male
Brazilian Academy of Sciences	Alberto Antonio Boveris	Sem Bolsa	SEM	Life Sciences	Male
Brazilian Academy of Sciences	Alberto Henrique Frade Laender	CA CC - Ciências da Computação	1A	Exact Sciences	Male
Brazilian Academy of Sciences	Alberto Passos Guimarães Filho	CA FA - Física e Astronomia	1B	Exact Sciences	Male
Brazilian Academy of Sciences	Alceu Gonçalves de Pinho Filho	Sem Bolsa	SEM	Exact Sciences	Male
Brazilian Academy of Sciences	Alcides Lins Neto	CA MA - Matemática e Estatística	1A	Exact Sciences	Male
Brazilian Academy of Sciences	Alcides Nóbrega Sial	CA GC - Geociências	1A	Exact Sciences	Male
Brazilian Academy of Sciences	Alessandro Fabricio Garcia	CA CC - Ciências da Computação	Pós-Doutorado	Exact Sciences	Male
Brazilian Academy of Sciences	Alexander Eduardo Arbieto Mendoza	Sem Bolsa	SEM	Exact Sciences	Male
Brazilian Academy of Sciences	Alexander Wilhelm Armin Kellner	CA ZO - Zoologia	1B	Life Sciences	Male
Brazilian Academy of Sciences	Alexandre Augusto Martins Rodrigues	Sem Bolsa	SEM	Exact Sciences	Male
Brazilian Academy of Sciences	Alexandre da Costa Pereira	CA MD - Medicina	2	Life Sciences	Male
Brazilian Academy of Sciences	Alexandre Luis Padovan Aleixo	CA ZO - Zoologia	1D	Life Sciences	Male
Brazilian Academy of Sciences	Alexandre Nolasco de Carvalho	CA MA - Matemática e Estatística	1B	Exact Sciences	Male
Brazilian Academy of Sciences	Alexandre Reily Rocha	CA FA - Física e Astronomia	2	Exact Sciences	Male
Brazilian Academy of Sciences	Alfredo Miguel Ozorio de Almeida	CA FA - Física e Astronomia	1B	Exact Sciences	Male
Brazilian Academy of Sciences	Alfredo Noel Iusem	CA MA - Matemática e Estatística	1A	Exact Sciences	Male
Brazilian Academy of Sciences	Aloísio Pessoa de Araújo	CA MA - Matemática e Estatística	1A	Exact Sciences	Male
Brazilian Academy of Sciences	Alvaro Toubes Prata	CA EM - Engenharia Mecânica, Naval e Oc	1A	Exact Sciences	Male
Brazilian Academy of Sciences	Alysson Roncally Carvalho	CA BF - Biofísica, Bioquímica, Farmaco	2	Life Sciences	Male
Brazilian Academy of Sciences	Américo Fialdini Junior	Sem Bolsa	SEM	Humanities	Male
Brazilian Academy of Sciences	Amir Ordacgi Caldeira	CA FA - Física e Astronomia	1A	Exact Sciences	Male
Brazilian Academy of Sciences	Amós Troper	CA FA - Física e Astronomia	1B	Exact Sciences	Male
Brazilian Academy of Sciences	Anderson de Rezende Rocha	CA CC - Ciências da Computação	2	Exact Sciences	Male
Brazilian Academy of Sciences	André Boischot	Sem Bolsa	SEM	Exact Sciences	Male
Brazilian Academy of Sciences	André Goffeau	Sem Bolsa	SEM	Life Sciences	Male
Brazilian Academy of Sciences	Andre Quincozes dos Santos	Sem Bolsa	SEM	Life Sciences	Male
Brazilian Academy of Sciences	Andrew John George Simpson	Sem Bolsa	SEM	Life Sciences	Male
Brazilian Academy of Sciences	Angel Luis Plastino	Sem Bolsa	SEM	Exact Sciences	Male
Brazilian Academy of Sciences	Ângelo Barbosa Monteiro Machado	Sem Bolsa	SEM	Life Sciences	Male
Brazilian Academy of Sciences	Angelo da Cunha Pinto	Sem Bolsa	SEM	Exact Sciences	Male
Brazilian Academy of Sciences	Anibal Eugenio Vercesi	CA BF - Biofísica, Bioquímica, Farmaco	1A	Life Sciences	Male
Brazilian Academy of Sciences	Aníbal Gil Lopes	Sem Bolsa	SEM	Life Sciences	Male
Brazilian Academy of Sciences	Anthony Brome Rylands	Sem Bolsa	SEM	Life Sciences	Male
Brazilian Academy of Sciences	Antônio Brito da Cunha	Sem Bolsa	SEM	Life Sciences	Male
Brazilian Academy of Sciences	Antonio Carlos Boschero	CA BF - Biofísica, Bioquímica, Farma	1A	Life Sciences	Male
Brazilian Academy of Sciences	Antonio Carlos Campos de Carvalho	CA BF - Biofísica, Bioquímica, Farma	1A	Life Sciences	Male
Brazilian Academy of Sciences	Antonio Carlos Rocha Campos	Sem Bolsa	SEM	Exact Sciences	Male
Brazilian Academy of Sciences	Antonio Celso Spinola Costa	Sem Bolsa	SEM	Exact Sciences	Male
Brazilian Academy of Sciences	Antonio Fernando Ribeiro de Toledo Piza	Sem Bolsa	SEM	Exact Sciences	Male
Brazilian Academy of Sciences	Antonio Galves	CA MA - Matemática e Estatística	1A	Exact Sciences	Male
Brazilian Academy of Sciences	Antonio Gomes de Souza Filho	Sem Bolsa	SEM	Life Sciences	Male
Brazilian Academy of Sciences	Antonio José Cortesao Pais Lima-de-Fari	Sem Bolsa	SEM	Life Sciences	Male
Brazilian Academy of Sciences	Antonio José da Costa Filho	CA BF - Biofísica, Bioquímica, Farmaco	1C	Life Sciences	Male
Brazilian Academy of Sciences	Antônio Lúcio Teixeira Júnior	CA MD - Medicina	1C	Life Sciences	Male
Brazilian Academy of Sciences	Antonio Luiz Braga	CA QU - Química	1A	Exact Sciences	Male
Brazilian Academy of Sciences	Antonio Manuel Pinto Bastos do Amaral Ta	Sem Bolsa	SEM	Life Sciences	Male
Brazilian Academy of Sciences	Antonio Martins Figueiredo Neto	CA FA - Física e Astronomia	1A	Exact Sciences	Male
Brazilian Academy of Sciences	Antonio Paes de Carvalho	Sem Bolsa	SEM	Life Sciences	Male
Brazilian Academy of Sciences	Antônio Rodrigues Cordeiro	Sem Bolsa	SEM	Life Sciences	Male
Brazilian Academy of Sciences	Antônio Sérgio Teixeira Pires	CA FA - Física e Astronomia	1A	Exact Sciences	Male
Brazilian Academy of Sciences	Armando Jose Antonio Parodi	Sem Bolsa	SEM	Life Sciences	Male
Brazilian Academy of Sciences	Arnaldo Leite Pinto Garcia	Sem Bolsa	SEM	Exact Sciences	Male
Brazilian Academy of Sciences	Aroldo Misi	Sem Bolsa	SEM	Exact Sciences	Male
Brazilian Academy of Sciences	Aron Jurkiewicz	CA BF - Biofísica, Bioquímica, Farma	1C	Life Sciences	Male
Brazilian Academy of Sciences	Aron Simis	CA MA - Matemática e Estatística	1A	Exact Sciences	Male
Brazilian Academy of Sciences	Arthur Gerbasi da Silva	Sem Bolsa	SEM	Exact Sciences	Male
Brazilian Academy of Sciences	Artur Avila Cordeiro de Melo	CA MA - Matemática e Estatística	1A	Exact Sciences	Male
Brazilian Academy of Sciences	Artur Beltrame Ribeiro	Sem Bolsa	SEM	Life Sciences	Male
Brazilian Academy of Sciences	Artur Luiz da Costa da Silva	CA GE - Genética	1D	Life Sciences	Male
Brazilian Academy of Sciences	Artur Oscar Lopes	CA MA - Matemática e Estatística	1B	Exact Sciences	Male
Brazilian Academy of Sciences	Avílio Antonio Franco	Sem Bolsa	SEM	Life Sciences	Male
Brazilian Academy of Sciences	Benedito Honório Machado	CA BF - Biofísica, Bioquímica, Farma	1A	Life Sciences	Male
Brazilian Academy of Sciences	Benildo Sousa Cavada	CA BF - Biofísica, Bioquímica, Farma	1A	Life Sciences	Male
Brazilian Academy of Sciences	Benjamin Bley de Brito Neves	Sem Bolsa	SEM	Exact Sciences	Male
Brazilian Academy of Sciences	Benjamin Gilbert	Sem Bolsa	SEM	Exact Sciences	Male
Brazilian Academy of Sciences	Bernard Leonard Horecker	Sem Bolsa	SEM	Life Sciences	Male
Brazilian Academy of Sciences	Bernardo Boris Vargaftig	Sem Bolsa	SEM	Life Sciences	Male
Brazilian Academy of Sciences	Bernardo Nunes Borges de Lima	CA MA - Matemática e Estatística	1D	Exact Sciences	Male
Brazilian Academy of Sciences	Bolívar Lamounier	Sem Bolsa	SEM	Humanities	Male
Brazilian Academy of Sciences	Boris Fausto	Sem Bolsa	SEM	Humanities	Male
Brazilian Academy of Sciences	Boyan Slavchev Sirakov	CA MA - Matemática e Estatística	1C	Exact Sciences	Male
Brazilian Academy of Sciences	Bráulio Magalhães Castro	Sem Bolsa	SEM	Life Sciences	Male
Brazilian Academy of Sciences	Brenno Amaro daSilveira Neto	CA QU - Química	2	Exact Sciences	Male
Brazilian Academy of Sciences	Brenno Caetano Troca Cabella	?	Pós-Doutorado	Life Sciences	Male
Brazilian Academy of Sciences	Brian F. Hoffman	Sem Bolsa	SEM	Life Sciences	Male
Brazilian Academy of Sciences	Bruno Anderson Matias da Rocha	CA BF - Biofísica, Bioquímica, Farma	2	Life Sciences	Male
Brazilian Academy of Sciences	Bruno Duarte Gomes	Sem Bolsa	SEM	Life Sciences	Male
Brazilian Academy of Sciences	Carl Djerassi	Sem Bolsa	SEM	Exact Sciences	Male
Brazilian Academy of Sciences	Carlos Afonso Nobre	CA CA - Ciências Ambientais	1A	Exact Sciences	Male
Brazilian Academy of Sciences	Carlos Alberto Aragão de Carvalho Filho	CA FA - Física e Astronomia	1A	Exact Sciences	Male
Brazilian Academy of Sciences	Carlos Alberto García Canal	Sem Bolsa	SEM	Exact Sciences	Male
Brazilian Academy of Sciences	Carlos Alexandre Netto	CA BF - Biofísica, Bioquímica, Farma	1A	Life Sciences	Male
Brazilian Academy of Sciences	Carlos Alfredo Joly	Sem Bolsa	SEM	Life Sciences	Male
Brazilian Academy of Sciences	Carlos Augusto Monteiro	CA SN - Saúde Coletiva e Nutrição	1A	Life Sciences	Male
Brazilian Academy of Sciences	Carlos Clemente Cerri	CA AG - Agronomia	1A	Exact Sciences	Male
Brazilian Academy of Sciences	Carlos Eduardo de Matos Bicudo	Sem Bolsa	SEM	Life Sciences	Male
Brazilian Academy of Sciences	Carlos Eduardo Guinle da Rocha Miranda	Sem Bolsa	SEM	Life Sciences	Male
Brazilian Academy of Sciences	Carlos Eduardo Pellegrino Cerri	CA CA - Ciências Ambientais	1D	Exact Sciences	Male
Brazilian Academy of Sciences	Carlos Emanuel de Souza	CA EE - Engenharia Elétrica e Bioméd	1A	Exact Sciences	Male
Brazilian Academy of Sciences	Carlos Frederico Martins Menck	CA GE - Genética	1A	Life Sciences	Male
Brazilian Academy of Sciences	Carlos Gustavo Nunes da Silva	Sem Bolsa	SEM	Life Sciences	Male
Brazilian Academy of Sciences	Carlos Gustavo Tamm de Araujo Moreira	CA MA - Matemática e Estatística	1A	Exact Sciences	Male
Brazilian Academy of Sciences	Carlos Henrique de Brito Cruz	Sem Bolsa	SEM	Exact Sciences	Male
Brazilian Academy of Sciences	Carlos Holger Wenzel Flechtmann	CA AG - Agronomia	1A	Exact Sciences	Male
Brazilian Academy of Sciences	Carlos José Pereira de Lucena	CA CC - Ciências da Computação	1A	Exact Sciences	Male
Brazilian Academy of Sciences	Carlos Medicis Morel	Sem Bolsa	SEM	Life Sciences	Male
Brazilian Academy of Sciences	Carlos Ourivio Escobar	Sem Bolsa	SEM	Exact Sciences	Male
Brazilian Academy of Sciences	Carlos Ricardo Soccol	CA AL - Ciência e Tecnologia de Aliment	1A	Life Sciences	Male
Brazilian Academy of Sciences	Carlos Tomei	CA MA - Matemática e Estatística	1A	Exact Sciences	Male
Brazilian Academy of Sciences	Casemiro Victorio Tondo	Sem Bolsa	SEM	Life Sciences	Male
Brazilian Academy of Sciences	Célio Lopes Silva	Sem Bolsa	SEM	Life Sciences	Male
Brazilian Academy of Sciences	Celso da Cruz Carneiro Ribeiro	CA CC - Ciências da Computação	1A	Exact Sciences	Male
Brazilian Academy of Sciences	Celso Dal Ré Carneiro	CA GC - Geociências	2	Exact Sciences	Male
Brazilian Academy of Sciences	Celso de Barros Gomes	CA GC - Geociências	1B	Exact Sciences	Male
Brazilian Academy of Sciences	Celso Grebogi	Sem Bolsa	SEM	Exact Sciences	Male
Brazilian Academy of Sciences	Celso José da Costa	Sem Bolsa	SEM	Exact Sciences	Male
Brazilian Academy of Sciences	Celso Lafer	Sem Bolsa	SEM	Humanities	Male
Brazilian Academy of Sciences	Celso Pinto de Melo	CA FA - Física e Astronomia	1A	Exact Sciences	Male
Brazilian Academy of Sciences	Celso Shiniti Nagano	CA BF - Biofísica, Bioquímica, Farma	2	Life Sciences	Male
Brazilian Academy of Sciences	Cesar Gomes Victora	CA SN - Saúde Coletiva e Nutrição	1A	Life Sciences	Male
Brazilian Academy of Sciences	César Leopoldo Camacho	CA MA - Matemática e Estatística	1A	Exact Sciences	Male
Brazilian Academy of Sciences	Cezar Antonio Elias	Sem Bolsa	SEM	Life Sciences	Male
Brazilian Academy of Sciences	Chaim Samuel Hönig	Sem Bolsa	SEM	Exact Sciences	Male
Brazilian Academy of Sciences	Charles Chapman Pugh	Sem Bolsa	SEM	Exact Sciences	Male
Brazilian Academy of Sciences	Charles G. Gross	Sem Bolsa	SEM	Life Sciences	Male
Brazilian Academy of Sciences	Charles Michael Newman	Sem Bolsa	SEM	Exact Sciences	Male
Brazilian Academy of Sciences	Chen Ning Yang	Sem Bolsa	SEM	Exact Sciences	Male
Brazilian Academy of Sciences	Chintamani Nagesa Ramachandra Rao	Sem Bolsa	SEM	Exact Sciences	Male
Brazilian Academy of Sciences	Cid Bartolomeu de Araújo	CA FA - Física e Astronomia	1A	Exact Sciences	Male
Brazilian Academy of Sciences	Claude Cohen-Tannoudji	Sem Bolsa	SEM	Exact Sciences	Male
Brazilian Academy of Sciences	Claudia Pinto Figueiredo	CA BF - Biofísica, Bioquímica, Farma	2	Life Sciences	Male
Brazilian Academy of Sciences	Claudio Airoldi	Sem Bolsa	SEM	Exact Sciences	Male
Brazilian Academy of Sciences	Cláudio Costa Neto	Sem Bolsa	SEM	Exact Sciences	Male
Brazilian Academy of Sciences	Cláudio Francisco Tormena	CA QU - Química	1D	Exact Sciences	Male
Brazilian Academy of Sciences	Claudio Landim	CA MA - Matemática e Estatística	1A	Exact Sciences	Male
Brazilian Academy of Sciences	Claudio Radtke	CA QU - Química	2	Exact Sciences	Male
Brazilian Academy of Sciences	Claudio Riccomini	CA GC - Geociências	1A	Exact Sciences	Male
Brazilian Academy of Sciences	Cleidson Ronald Botelho de Souza	CA 92 - Programa de Tecnologia da Inform	2	Exact Sciences	Male
Brazilian Academy of Sciences	Clifford Allen Bunton	Sem Bolsa	SEM	Exact Sciences	Male
Brazilian Academy of Sciences	Clovis Caesar Gonzaga	CA MA - Matemática e Estatística	SR	Exact Sciences	Male
Brazilian Academy of Sciences	Colombo Celso Gaeta Tassinari	CA GC - Geociências	1A	Exact Sciences	Male
Brazilian Academy of Sciences	Constantino Tsallis	CA FA - Física e Astronomia	1A	Exact Sciences	Male
Brazilian Academy of Sciences	Cristiano Fantini Leite	CA FA - Física e Astronomia	2	Exact Sciences	Male
Brazilian Academy of Sciences	Cristiano Krug	Sem Bolsa	SEM	Exact Sciences	Male
Brazilian Academy of Sciences	Cristiano Monteiro de Barros Cordeiro	CA FA - Física e Astronomia	2	Exact Sciences	Male
Brazilian Academy of Sciences	Curtis Gove Callan Jr	Sem Bolsa	SEM	Exact Sciences	Male
Brazilian Academy of Sciences	Cylon Eudóxio Tricot Gonçalves da Silv	Sem Bolsa	SEM	Exact Sciences	Male
Brazilian Academy of Sciences	Dan Marchesin	CA MA - Matemática e Estatística	1A	Exact Sciences	Male
Brazilian Academy of Sciences	Daniel Bernard Nahon	Sem Bolsa	SEM	Exact Sciences	Male
Brazilian Academy of Sciences	Daniel Felinto Pires Barbosa	CA FA - Física e Astronomia	2	Exact Sciences	Male
Brazilian Academy of Sciences	Daniel Lorscheitter Baptista	CA ME - Microeletrônica	2	Exact Sciences	Male
Brazilian Academy of Sciences	Daniel Marinho Pellegrino	CA MA - Matemática e Estatística	1C	Exact Sciences	Male
Brazilian Academy of Sciences	Daniel Mario Ugarte	CA FA - Física e Astronomia	1A	Exact Sciences	Male
Brazilian Academy of Sciences	Darcy Pedro Svisero	Sem Bolsa	SEM	Exact Sciences	Male
Brazilian Academy of Sciences	Dario Grattapaglia	CA RF - Recursos Florestais	1B	Life Sciences	Male
Brazilian Academy of Sciences	Dario Simões Zamboni	CA IM - Imunologia	1C	Life Sciences	Male
Brazilian Academy of Sciences	David Conover Spray	Sem Bolsa	SEM	Life Sciences	Male
Brazilian Academy of Sciences	David Goldstein	Sem Bolsa	SEM	Life Sciences	Male
Brazilian Academy of Sciences	David Goldstein Costa	Sem Bolsa	SEM	Exact Sciences	Male
Brazilian Academy of Sciences	David John Chivers	Sem Bolsa	SEM	Life Sciences	Male
Brazilian Academy of Sciences	David Ross Brillinger	Sem Bolsa	SEM	Exact Sciences	Male
Brazilian Academy of Sciences	Dennis Parnell Sullivan	Sem Bolsa	SEM	Exact Sciences	Male
Brazilian Academy of Sciences	Dick Peters	Sem Bolsa	SEM	Life Sciences	Male
Brazilian Academy of Sciences	Diego Bonatto	CA BF - Biofísica, Bioquímica, Farma	1C	Life Sciences	Male
Brazilian Academy of Sciences	Diego Marques Ferreira	CA MA - Matemática e Estatística	2	Exact Sciences	Male
Brazilian Academy of Sciences	Diego Trancanelli	CA FA - Física e Astronomia	2	Exact Sciences	Male
Brazilian Academy of Sciences	Dietrich Stauffer	Sem Bolsa	SEM	Exact Sciences	Male
Brazilian Academy of Sciences	Diogenes de Almeida Campos	Sem Bolsa	SEM	Exact Sciences	Male
Brazilian Academy of Sciences	Diogo Onofre Gomes de Souza	CA BF - Biofísica, Bioquímica, Farma	1A	Life Sciences	Male
Brazilian Academy of Sciences	Djairo Guedes de Figueiredo	CA MA - Matemática e Estatística	1A	Exact Sciences	Male
Brazilian Academy of Sciences	Douglas Taylor Golenbock	Sem Bolsa	SEM	Life Sciences	Male
Brazilian Academy of Sciences	Dráulio Barros de Araújo	CA BF - Biofísica, Bioquímica, Farma	2	Life Sciences	Male
Brazilian Academy of Sciences	Eberhard Wernick	Sem Bolsa	SEM	Exact Sciences	Male
Brazilian Academy of Sciences	Eder Carlos Rocha Quintão	Sem Bolsa	SEM	Life Sciences	Male
Brazilian Academy of Sciences	Edgar Dutra Zanotto	CA MM - Engenharia de Minas, Metalúrgic	1A	Exact Sciences	Male
Brazilian Academy of Sciences	Edgar Marcelino de Carvalho Filho	CA IM - Imunologia	1A	Life Sciences	Male
Brazilian Academy of Sciences	Edilson Lucena Falcão Filho	CA FA - Física e Astronomia	2	Exact Sciences	Male
Brazilian Academy of Sciences	Edleno Silva de Moura	CA CC - Ciências da Computação	1C	Exact Sciences	Male
Brazilian Academy of Sciences	Edmar Lisboa Bacha	Sem Bolsa	SEM	Humanities	Male
Brazilian Academy of Sciences	Edmo José Dias Campos	CA OC - Oceanografia	1A	Exact Sciences	Male
Brazilian Academy of Sciences	Edmundo Albuquerque de Souza e Silva	CA CC - Ciências da Computação	1A	Exact Sciences	Male
Brazilian Academy of Sciences	Edmundo Alfredo Rúveda	Sem Bolsa	SEM	Exact Sciences	Male
Brazilian Academy of Sciences	Edson Antonio Ticianelli	CA QU - Química	1A	Exact Sciences	Male
Brazilian Academy of Sciences	Edson Xavier Albuquerque	Sem Bolsa	SEM	Life Sciences	Male
Brazilian Academy of Sciences	Eduardo Alejandro Lissi	Sem Bolsa	SEM	Exact Sciences	Male
Brazilian Academy of Sciences	Eduardo Antônio Ladeira	Sem Bolsa	SEM	Exact Sciences	Male
Brazilian Academy of Sciences	Eduardo Büchele Rodrigues	Sem Bolsa	SEM	Life Sciences	Male
Brazilian Academy of Sciences	Eduardo Cantera Marino	Sem Bolsa	SEM	Exact Sciences	Male
Brazilian Academy of Sciences	Eduardo de Sequeira Esteves	CA MA - Matemática e Estatística	1B	Exact Sciences	Male
Brazilian Academy of Sciences	Eduardo Eizirik	CA GE - Genética	1C	Life Sciences	Male
Brazilian Academy of Sciences	Eduardo Enrique Castilla	Pesquisador Visitante	SR	Life Sciences	Male
Brazilian Academy of Sciences	Eduardo Freire Nakamura	CA CC - Ciências da Computação	2	Exact Sciences	Male
Brazilian Academy of Sciences	Eduardo Luis Fabiano Franco	Sem Bolsa	SEM	Exact Sciences	Male
Brazilian Academy of Sciences	Eduardo Luiz Damiani Bica	CA FA - Física e Astronomia	2	Exact Sciences	Male
Brazilian Academy of Sciences	Eduardo Moacyr Krieger	Sem Bolsa	SEM	Life Sciences	Male
Brazilian Academy of Sciences	Eduardo Sany Laber	CA CC - Ciências da Computação	1C	Exact Sciences	Male
Brazilian Academy of Sciences	Eduardo Souza Fraga	CA FA - Física e Astronomia	1D	Exact Sciences	Male
Brazilian Academy of Sciences	Eduardo Vasconcelos Oliveira Teixeira	CA MA - Matemática e Estatística	1B	Exact Sciences	Male
Brazilian Academy of Sciences	Efim Zelmanov	Sem Bolsa	SEM	Exact Sciences	Male
Brazilian Academy of Sciences	Egler Chiari	CA MP - Microbiologia e Parasitologia	1A	Life Sciences	Male
Brazilian Academy of Sciences	Elcio Abdalla	CA FA - Física e Astronomia	1A	Exact Sciences	Male
Brazilian Academy of Sciences	Elias Ayres Guidetti Zagatto	CA QU - Química	1A	Exact Sciences	Male
Brazilian Academy of Sciences	Elibio Leopoldo Rech Filho	CA BI - Biotecnologia	1A	Life Sciences	Male
Brazilian Academy of Sciences	Eliezer Jesus de Lacerda Barreiro	CA FR - Farmácia	1A	Life Sciences	Male
Brazilian Academy of Sciences	Elisaldo Luiz de Araújo Carlini	Sem Bolsa	SEM	Life Sciences	Male
Brazilian Academy of Sciences	Elliot Watanabe Kitajima	CA AG - Agronomia	1A	Exact Sciences	Male
Brazilian Academy of Sciences	Eloi de Souza Garcia	CA MP - Microbiologia e Parasitologia	1A	Life Sciences	Male
Brazilian Academy of Sciences	Elon Lages Lima	Sem Bolsa	SEM	Exact Sciences	Male
Brazilian Academy of Sciences	Elson Longo da Silva	CA MM - Engenharia de Minas, Metalúrgic	1A	Exact Sciences	Male
Brazilian Academy of Sciences	Emanuel Augusto de Souza Carneiro	CA MA - Matemática e Estatística	1D	Exact Sciences	Male
Brazilian Academy of Sciences	Emanuel Ferraz Jardim de Sá	Sem Bolsa	SEM	Exact Sciences	Male
Brazilian Academy of Sciences	Emiliano Horacio Medei	CA BF - Biofísica, Bioquímica, Farma	2	Life Sciences	Male
Brazilian Academy of Sciences	Emilio Luiz Streck	CA BF - Biofísica, Bioquímica, Farma	1D	Life Sciences	Male
Brazilian Academy of Sciences	Ennio Marques Palmeira	CA EC - Engenharia Civil	1C	Exact Sciences	Male
Brazilian Academy of Sciences	Enrique Ramiro Pujals	CA MA - Matemática e Estatística	1A	Exact Sciences	Male
Brazilian Academy of Sciences	Erasmo Madureira Ferreira	CA FA - Física e Astronomia	SR	Exact Sciences	Male
Brazilian Academy of Sciences	Erik Christopher Zeeman (Sir)	Sem Bolsa	SEM	Exact Sciences	Male
Brazilian Academy of Sciences	Ernesto Carneiro Pessoa Raposo	CA FA - Física e Astronomia	1C	Exact Sciences	Male
Brazilian Academy of Sciences	Erney Felício Plessmann de Camargo	CA MP - Microbiologia e Parasitologia	1A	Life Sciences	Male
Brazilian Academy of Sciences	Ernst Friedrich Günter Klesper	Sem Bolsa	SEM	Exact Sciences	Male
Brazilian Academy of Sciences	Ernst Wolfgang Hamburger	Sem Bolsa	SEM	Exact Sciences	Male
Brazilian Academy of Sciences	Esper Abrão Cavalheiro	CA MD - Medicina	1A	Life Sciences	Male
Brazilian Academy of Sciences	Etelvino José Henriques Bechara	CA BF - Biofísica, Bioquímica, Farma	1A	Life Sciences	Male
Brazilian Academy of Sciences	Eugênio Foresti	CA CA - Ciências Ambientais	1A	Life Sciences	Male
Brazilian Academy of Sciences	Eugenius Kaszkurewicz	Sem Bolsa	SEM	Exact Sciences	Male
Brazilian Academy of Sciences	Evaldo Ferreira Vilela	CA AG - Agronomia	1A	Exact Sciences	Male
Brazilian Academy of Sciences	Evando Mirra de Paula e Silva	Sem Bolsa	SEM	Exact Sciences	Male
Brazilian Academy of Sciences	Fabiano Severo Rodembusch	CA QU - Química	1A	Exact Sciences	Male
Brazilian Academy of Sciences	Fábio de Melo Sene	Sem Bolsa	SEM	Life Sciences	Male
Brazilian Academy of Sciences	Fábio de Oliveira Pedrosa	CA BF - Biofísica, Bioquímica, Farma	1A	Life Sciences	Male
Brazilian Academy of Sciences	Fábio Klamt	CA BF - Biofísica, Bioquímica, Farma	1D	Life Sciences	Male
Brazilian Academy of Sciences	Fábio Rodrigo Piovezani Rocha	CA QU - Química	1D	Exact Sciences	Male
Brazilian Academy of Sciences	Fabricio Beggiato Baccaro	Sem Bolsa	SEM	Life Sciences	Male
Brazilian Academy of Sciences	Fabrício Benevenuto de Souza	CA CC - Ciências da Computação	2	Exact Sciences	Male
Brazilian Academy of Sciences	Fabricio Siqueira Benevides	Sem Bolsa	SEM	Exact Sciences	Male
Brazilian Academy of Sciences	Faruk José Nome Aguilera	CA QU - Química	1A	Exact Sciences	Male
Brazilian Academy of Sciences	Fausto Foresti	CA GE - Genética	1A	Life Sciences	Male
Brazilian Academy of Sciences	Felipe Dal-Pizzol	CA MD - Medicina	1A	Life Sciences	Male
Brazilian Academy of Sciences	Fernando Antonio Figueiredo Cardoso da S	CA MA - Matemática e Estatística	1B	Exact Sciences	Male
Brazilian Academy of Sciences	Fernando Cendes	CA MD - Medicina	1A	Life Sciences	Male
Brazilian Academy of Sciences	Fernando Cláudio Zawislak	Sem Bolsa	SEM	Exact Sciences	Male
Brazilian Academy of Sciences	Fernando Codá dos Santos Cavalcanti Mar	Sem Bolsa	SEM	Exact Sciences	Male
Brazilian Academy of Sciences	Fernando Cosme Rizzo Assunção	CA MM - Engenharia de Minas, Metalúrgic	1A	Exact Sciences	Male
Brazilian Academy of Sciences	Fernando Costa e Silva Filho	Sem Bolsa	SEM	Life Sciences	Male
Brazilian Academy of Sciences	Fernando de Castro Reinach	Sem Bolsa	SEM	Life Sciences	Male
Brazilian Academy of Sciences	Fernando de Queiroz Cunha	CA BF - Biofísica, Bioquímica, Farma	1A	Life Sciences	Male
Brazilian Academy of Sciences	Fernando de Souza Barros	Sem Bolsa	SEM	Exact Sciences	Male
Brazilian Academy of Sciences	Fernando Dias de Avila Pires	Sem Bolsa	SEM	Exact Sciences	Male
Brazilian Academy of Sciences	Fernando Ferreira Costa	CA MD - Medicina	1A	Life Sciences	Male
Brazilian Academy of Sciences	Fernando Galembeck	CA QU - Química	1A	Exact Sciences	Male
Brazilian Academy of Sciences	Fernando Garcia de Mello	CA BF - Biofísica, Bioquímica, Farma	SR	Life Sciences	Male
Brazilian Academy of Sciences	Fernando Lázaro Freire Júnior	CA FA - Física e Astronomia	1A	Exact Sciences	Male
Brazilian Academy of Sciences	Flávio Pereira Kapczinski	CA MD - Medicina	1A	Life Sciences	Male
Brazilian Academy of Sciences	Francisco Antonio Bezerra Coutinho	CA FA - Física e Astronomia	1B	Exact Sciences	Male
Brazilian Academy of Sciences	Francisco Castilho Alcaraz	CA FA - Física e Astronomia	1A	Exact Sciences	Male
Brazilian Academy of Sciences	Francisco César de Sá Barreto	Sem Bolsa	SEM	Exact Sciences	Male
Brazilian Academy of Sciences	Francisco José Barrantes	Sem Bolsa	SEM	Life Sciences	Male
Brazilian Academy of Sciences	Francisco Lacaz de Moraes Vieira	Sem Bolsa	SEM	Life Sciences	Male
Brazilian Academy of Sciences	Francisco Mauro Salzano	CA GE - Genética	1A	Life Sciences	Male
Brazilian Academy of Sciences	Francisco Radler de Aquino Neto	Sem Bolsa	SEM	Exact Sciences	Male
Brazilian Academy of Sciences	Francisco Rafael Martins Laurindo	CA MD - Medicina	1A	Life Sciences	Male
Brazilian Academy of Sciences	Francisco Silveira Guimarães	CA BF - Biofísica, Bioquímica, Farma	1A	Life Sciences	Male
Brazilian Academy of Sciences	Frank Herbert Quina	CA QU - Química	1A	Exact Sciences	Male
Brazilian Academy of Sciences	Frank Nelson Crespilho	CA QU - Química	2	Exact Sciences	Male
Brazilian Academy of Sciences	Franklin Alan Sher	Sem Bolsa	SEM	Exact Sciences	Male
Brazilian Academy of Sciences	Frédéric Checler	Sem Bolsa	SEM	Life Sciences	Male
Brazilian Academy of Sciences	Frederico Guilherme Graeff	CA BF - Biofísica, Bioquímica, Farma	SR	Life Sciences	Male
Brazilian Academy of Sciences	Gabriel Rodríguez de Freitas	Sem Bolsa	SEM	Life Sciences	Male
Brazilian Academy of Sciences	George Alexandre dos Reis	CA IM - Imunologia	SR	Life Sciences	Male
Brazilian Academy of Sciences	Geraldo Lippel Sant'Anna Junior	Sem Bolsa	SEM	Exact Sciences	Male
Brazilian Academy of Sciences	Gérard Plateau	Sem Bolsa	SEM	Exact Sciences	Male
Brazilian Academy of Sciences	Gerd Wilhelm Kohlhepp	Sem Bolsa	SEM	Humanities	Male
Brazilian Academy of Sciences	Gerhard Beurlen	Sem Bolsa	SEM	Exact Sciences	Male
Brazilian Academy of Sciences	Gerhard Jacob	Sem Bolsa	SEM	Exact Sciences	Male
Brazilian Academy of Sciences	Gerhard Malnic	CA BF - Biofísica, Bioquímica, Farma	SR	Life Sciences	Male
Brazilian Academy of Sciences	Ghillean Tolmie Prance (Sir)	Sem Bolsa	SEM	Life Sciences	Male
Brazilian Academy of Sciences	Gil da Costa Marques	Sem Bolsa	SEM	Exact Sciences	Male
Brazilian Academy of Sciences	Gilberto Barbosa Domont	CA BF - Biofísica, Bioquímica, Farma	1D	Life Sciences	Male
Brazilian Academy of Sciences	Gilberto De Nucci	CA BF - Biofísica, Bioquímica, Farma	1A	Life Sciences	Male
Brazilian Academy of Sciences	Gilberto Fernandes de Sá	CA QU - Química	1B	Exact Sciences	Male
Brazilian Academy of Sciences	Gilles O. Allard	Sem Bolsa	SEM	Exact Sciences	Male
Brazilian Academy of Sciences	Giorgio Eugênio Oscare Giacaglia	Sem Bolsa	SEM	Exact Sciences	Male
Brazilian Academy of Sciences	Giovanni Gazzinelli	Sem Bolsa	SEM	Life Sciences	Male
Brazilian Academy of Sciences	Giuseppe Inesi	Sem Bolsa	SEM	Life Sciences	Male
Brazilian Academy of Sciences	Glaucius Oliva	CA BF - Biofísica, Bioquímica, Farma	1A	Life Sciences	Male
Brazilian Academy of Sciences	Guilherme Baldo	Sem Bolsa	SEM	Life Sciences	Male
Brazilian Academy of Sciences	Guilherme Lanzi Sassaki	CA BF - Biofísica, Bioquímica, Farma	1C	Life Sciences	Male
Brazilian Academy of Sciences	Guilherme Suarez-Kurtz	CA BF - Biofísica, Bioquímica, Farma	1A	Life Sciences	Male
Brazilian Academy of Sciences	Gunter Heinrich Reinhard Kegel	Sem Bolsa	SEM	Exact Sciences	Male
Brazilian Academy of Sciences	Gustavo Batista de Menezes	CA MF - Morfologia	2	Life Sciences	Male
Brazilian Academy of Sciences	Gustavo Henrique Frigieri Vilela	Sem Bolsa	SEM	Life Sciences	Male
Brazilian Academy of Sciences	Hamilton Brandão Varela de Albuquerque	CA QU - Química	1D	Exact Sciences	Male
Brazilian Academy of Sciences	Hans Jürgen Herrmann	Sem Bolsa	SEM	Exact Sciences	Male
Brazilian Academy of Sciences	Hans-Joachim Freund	Sem Bolsa	SEM	Exact Sciences	Male
Brazilian Academy of Sciences	Héctor Francisco Terenzi	Sem Bolsa	SEM	Life Sciences	Male
Brazilian Academy of Sciences	Héctor Nicolás Seuánez Abreu	CA GE - Genética	1A	Life Sciences	Male
Brazilian Academy of Sciences	Helgio Henrique Casses Trindade	CA CS - Antrop., Arqueol., C. Política,	SR	Humanities	Male
Brazilian Academy of Sciences	Hélio Bezerra Coutinho	Sem Bolsa	SEM	Life Sciences	Male
Brazilian Academy of Sciences	Helio Cesar Salgado	CA BF - Biofísica, Bioquímica, Farma	1A	Life Sciences	Male
Brazilian Academy of Sciences	Hélio Teixeira Coelho	Sem Bolsa	SEM	Exact Sciences	Male
Brazilian Academy of Sciences	Helion Vargas	CA FA - Física e Astronomia	1A	Exact Sciences	Male
Brazilian Academy of Sciences	Helton da Costa Santiago	CA IM - Imunologia	2	Life Sciences	Male
Brazilian Academy of Sciences	Henrique Bursztyn	CA MA - Matemática e Estatística	1B	Exact Sciences	Male
Brazilian Academy of Sciences	Henrique Eisi Toma	CA QU - Química	1A	Exact Sciences	Male
Brazilian Academy of Sciences	Henrique Fleming	Sem Bolsa	SEM	Exact Sciences	Male
Brazilian Academy of Sciences	Henrique Krieger	CA GE - Genética	SR	Life Sciences	Male
Brazilian Academy of Sciences	Herbert Bernard Tanowitz	Sem Bolsa	SEM	Life Sciences	Male
Brazilian Academy of Sciences	Herbert Blaine Lawson Jr.	Sem Bolsa	SEM	Exact Sciences	Male
Brazilian Academy of Sciences	Herbert Rabin	Sem Bolsa	SEM	Exact Sciences	Male
Brazilian Academy of Sciences	Herch Moysés Nussenzveig	Sem Bolsa	SEM	Exact Sciences	Male
Brazilian Academy of Sciences	Hernan Chaimovich Guralnik	CA QU - Química	SR	Exact Sciences	Male
Brazilian Academy of Sciences	Hervé Michel Chneiweiss	Sem Bolsa	SEM	Life Sciences	Male
Brazilian Academy of Sciences	Hilário Alencar da Silva	CA MA - Matemática e Estatística	1C	Exact Sciences	Male
Brazilian Academy of Sciences	Horacio Schneider	CA GE - Genética	1B	Life Sciences	Male
Brazilian Academy of Sciences	Hugo Aguirre Armelin	CA BF - Biofísica, Bioquímica, Farma	SR	Life Sciences	Male
Brazilian Academy of Sciences	Hugo Jorge Monteiro	Sem Bolsa	SEM	Exact Sciences	Male
Brazilian Academy of Sciences	Hugo Verli	CA BF - Biofísica, Bioquímica, Farma	1D	Life Sciences	Male
Brazilian Academy of Sciences	Humberto Siqueira Brandi	Sem Bolsa	SEM	Exact Sciences	Male
Brazilian Academy of Sciences	Iain Le May	Sem Bolsa	SEM	Exact Sciences	Male
Brazilian Academy of Sciences	Icaro Vitorello	CA GC - Geociências	1A	Exact Sciences	Male
Brazilian Academy of Sciences	Igor Ivory Gil Pacca	CA GC - Geociências	SR	Exact Sciences	Male
Brazilian Academy of Sciences	Igor Luis Kaefer	Sem Bolsa	SEM	Life Sciences	Male
Brazilian Academy of Sciences	Isaac Roitman	Sem Bolsa	SEM	Life Sciences	Male
Brazilian Academy of Sciences	Isaias Raw	Sem Bolsa	SEM	Life Sciences	Male
Brazilian Academy of Sciences	Israel Vainsencher	CA MA - Matemática e Estatística	1A	Exact Sciences	Male
Brazilian Academy of Sciences	Iván Antonio Izquierdo	CA BF - Biofísica, Bioquímica, Farma	1A	Life Sciences	Male
Brazilian Academy of Sciences	Ivan Chestakov	CA MA - Matemática e Estatística	1A	Exact Sciences	Male
Brazilian Academy of Sciences	Ivan da Mota e Albuquerque	Sem Bolsa	SEM	Life Sciences	Male
Brazilian Academy of Sciences	Ivan Kupka	Sem Bolsa	SEM	Exact Sciences	Male
Brazilian Academy of Sciences	Ivano Gebhardt Rolf Gutz	CA QU - Química	1B	Exact Sciences	Male
Brazilian Academy of Sciences	Jack Schechtman	Sem Bolsa	SEM	Exact Sciences	Male
Brazilian Academy of Sciences	Jackson Damiani Scholten	Sem Bolsa	SEM	Exact Sciences	Male
Brazilian Academy of Sciences	Jacob Palis Junior	CA MA - Matemática e Estatística	1A	Exact Sciences	Male
Brazilian Academy of Sciences	Jacques P. Cassedanne	Sem Bolsa	SEM	Exact Sciences	Male
Brazilian Academy of Sciences	Jacques Raymond Daniel Lépine	CA FA - Física e Astronomia	1A	Exact Sciences	Male
Brazilian Academy of Sciences	Jailson Bittencourt de Andrade	CA QU - Química	1A	Exact Sciences	Male
Brazilian Academy of Sciences	Jairo da Silva Bochi	Sem Bolsa	SEM	Exact Sciences	Male
Brazilian Academy of Sciences	Jairo Francisco Savian	Sem Bolsa	SEM	Exact Sciences	Male
Brazilian Academy of Sciences	Jairton Dupont	CA QU - Química	1A	Exact Sciences	Male
Brazilian Academy of Sciences	James A. Marshall	Sem Bolsa	SEM	Exact Sciences	Male
Brazilian Academy of Sciences	James Alexander Ratter	Sem Bolsa	SEM	Life Sciences	Male
Brazilian Academy of Sciences	James Joseph Heckman	Sem Bolsa	SEM	Humanities	Male
Brazilian Academy of Sciences	James Lafayette McGaugh	Sem Bolsa	SEM	Humanities	Male
Brazilian Academy of Sciences	Jayme Luiz Szwarcfiter	CA CC - Ciências da Computação	1A	Exact Sciences	Male
Brazilian Academy of Sciences	Jean Kossanyi	Sem Bolsa	SEM	Exact Sciences	Male
Brazilian Academy of Sciences	Jean Pierre von der Weid	CA EE - Engenharia Elétrica e Bioméd	1A	Exact Sciences	Male
Brazilian Academy of Sciences	Jean-Christophe Yoccoz	Sem Bolsa	SEM	Exact Sciences	Male
Brazilian Academy of Sciences	Jean-François Treves	Sem Bolsa	SEM	Exact Sciences	Male
Brazilian Academy of Sciences	Jefferson Cardia Simões	CA QU - Química	1B	Exact Sciences	Male
Brazilian Academy of Sciences	Jeronimo Lameira Silva	CA QU - Química	2	Exact Sciences	Male
Brazilian Academy of Sciences	Jerson Lima Silva	CA BF - Biofísica, Bioquímica, Farmaco	1A	Life Sciences	Male
Brazilian Academy of Sciences	Jesus Aparecido Ferro	CA BF - Biofísica, Bioquímica, Farmaco	1D	Life Sciences	Male
Brazilian Academy of Sciences	João Alziro Herz da Jornada	Sem Bolsa	SEM	Exact Sciences	Male
Brazilian Academy of Sciences	João Antonio Pegas Henriques	CA BF - Biofísica, Bioquímica, Farmaco	1A	Life Sciences	Male
Brazilian Academy of Sciences	João Batista Calixto	CA BF - Biofísica, Bioquímica, Farmaco	1A	Life Sciences	Male
Brazilian Academy of Sciences	João Batista Corrêa da Silva	CA GC - Geociências	1A	Exact Sciences	Male
Brazilian Academy of Sciences	João Batista Teixeira da Rocha	CA BF - Biofísica, Bioquímica, Farmaco	1A	Life Sciences	Male
Brazilian Academy of Sciences	João E. Steiner	CA FA - Física e Astronomia	1A	Exact Sciences	Male
Brazilian Academy of Sciences	João Fernando Gomes de Oliveira	CA EM - Engenharia Mecânica, Naval e Oc	1A	Exact Sciences	Male
Brazilian Academy of Sciences	João José Bigarella	Sem Bolsa	SEM	Exact Sciences	Male
Brazilian Academy of Sciences	João Lucas Marques Barbosa	CA MA - Matemática e Estatística	SR	Exact Sciences	Male
Brazilian Academy of Sciences	João Luciano de Quevedo	CA MD - Medicina	1A	Life Sciences	Male
Brazilian Academy of Sciences	João Lúcio de Azevedo	Sem Bolsa	SEM	Life Sciences	Male
Brazilian Academy of Sciences	João Manoel Pinho de Mello	CA AE - Administração, Contabilidade e	1D	Humanities	Male
Brazilian Academy of Sciences	João Santana da Silva	CA IM - Imunologia	1A	Life Sciences	Male
Brazilian Academy of Sciences	João Trindade Marques	Sem Bolsa	SEM	Life Sciences	Male
Brazilian Academy of Sciences	João Valdir Comasseto	CA QU - Química	SR	Exact Sciences	Male
Brazilian Academy of Sciences	João Vicente Braga de Souza	Sem Bolsa	SEM	Life Sciences	Male
Brazilian Academy of Sciences	João Vital da Cunha Júnior	CA FA - Física e Astronomia	2	Exact Sciences	Male
Brazilian Academy of Sciences	John Campbell Brown	Sem Bolsa	SEM	Exact Sciences	Male
Brazilian Academy of Sciences	John Graham Maisey	Sem Bolsa	SEM	Exact Sciences	Male
Brazilian Academy of Sciences	John Lawrence Wallace	Sem Bolsa	SEM	Life Sciences	Male
Brazilian Academy of Sciences	John Marius Opitz	Sem Bolsa	SEM	Life Sciences	Male
Brazilian Academy of Sciences	John Norman Mather	Sem Bolsa	SEM	Exact Sciences	Male
Brazilian Academy of Sciences	Jonas de Miranda Gomes	Sem Bolsa	SEM	Exact Sciences	Male
Brazilian Academy of Sciences	Jorge Almeida Guimarães	CA BF - Biofísica, Bioquímica, Farmaco	SR	Life Sciences	Male
Brazilian Academy of Sciences	Jorge Daniel Riera	CA EC - Engenharia Civil	SR	Exact Sciences	Male
Brazilian Academy of Sciences	Jorge Elias Kalil Filho	CA MD - Medicina	1A	Life Sciences	Male
Brazilian Academy of Sciences	Jorge Guillermo Hounie	CA MA - Matemática e Estatística	1A	Exact Sciences	Male
Brazilian Academy of Sciences	Jorge Herbert Soares de Lira	CA MA - Matemática e Estatística	1C	Exact Sciences	Male
Brazilian Academy of Sciences	Jorge Horacio Medina	Sem Bolsa	SEM	Life Sciences	Male
Brazilian Academy of Sciences	Jorge José Leite Noronha Junior	CA FA - Física e Astronomia	2	Exact Sciences	Male
Brazilian Academy of Sciences	Jorge Luiz Gross	CA MD - Medicina	1A	Life Sciences	Male
Brazilian Academy of Sciences	Jorge Manuel Sotomayor Tello	Sem Bolsa	SEM	Exact Sciences	Male
Brazilian Academy of Sciences	Jorge Neval Moll Neto	CA MD - Medicina	1D	Life Sciences	Male
Brazilian Academy of Sciences	Jorge Rubio	CA MM - Engenharia de Minas, Metalúrgic	1A	Exact Sciences	Male
Brazilian Academy of Sciences	José Abrunheiro da Silva Cavaleiro	Sem Bolsa	SEM	Exact Sciences	Male
Brazilian Academy of Sciences	José Alberto Cuminato	CA MA - Matemática e Estatística	1C	Exact Sciences	Male
Brazilian Academy of Sciences	José Alexander Araújo	CA EM - Engenharia Mecânica, Naval e Oc	1D	Exact Sciences	Male
Brazilian Academy of Sciences	Jose Alexandre Felizola Diniz Filho	CA EL - Ecologia e Limnologia	1A	Life Sciences	Male
Brazilian Academy of Sciences	José Alexandre Scheinkman	Sem Bolsa	SEM	Humanities	Male
Brazilian Academy of Sciences	José Antônio de Freitas Pacheco	Sem Bolsa	SEM	Exact Sciences	Male
Brazilian Academy of Sciences	Jose Antonio Marengo Orsini	CA CA - Ciências Ambientais	1A	Life Sciences	Male
Brazilian Academy of Sciences	José Antunes Rodrigues	CA BF - Biofísica, Bioquímica, Farmaco	1A	Life Sciences	Male
Brazilian Academy of Sciences	José Arana Varela	CA MM - Engenharia de Minas, Metalúrgic	1A	Exact Sciences	Male
Brazilian Academy of Sciences	José Augusto Penteado Aranha	Sem Bolsa	SEM	Exact Sciences	Male
Brazilian Academy of Sciences	José Carlos Costa da Silva Pinto	CA EQ - Engenharia Química	1A	Exact Sciences	Male
Brazilian Academy of Sciences	José Carlos Farias Alves Filho	CA IM - Imunologia	2	Life Sciences	Male
Brazilian Academy of Sciences	José Claudio Geromel	CA EE - Engenharia Elétrica e Bioméd	1A	Exact Sciences	Male
Brazilian Academy of Sciences	José Daniel Lopes	CA IM - Imunologia	1B	Life Sciences	Male
Brazilian Academy of Sciences	José Eduardo Krieger	CA MD - Medicina	1A	Life Sciences	Male
Brazilian Academy of Sciences	José Ellis Ripper Filho	Sem Bolsa	SEM	Exact Sciences	Male
Brazilian Academy of Sciences	José Felipe Voloch	Sem Bolsa	SEM	Exact Sciences	Male
Brazilian Academy of Sciences	José Fernando Perez	Sem Bolsa	SEM	Exact Sciences	Male
Brazilian Academy of Sciences	José Ferreira Fernandes	Sem Bolsa	SEM	Exact Sciences	Male
Brazilian Academy of Sciences	José Galizia Tundisi	Sem Bolsa	SEM	Exact Sciences	Male
Brazilian Academy of Sciences	José Goldemberg	Sem Bolsa	SEM	Exact Sciences	Male
Brazilian Academy of Sciences	José Israel Vargas	Sem Bolsa	SEM	Exact Sciences	Male
Brazilian Academy of Sciences	José Luís Fontes da Costa Lima	Sem Bolsa	SEM	Exact Sciences	Male
Brazilian Academy of Sciences	José Manuel Riveros Nigra	CA QU - Química	SR	Exact Sciences	Male
Brazilian Academy of Sciences	José Marcos Chaves Ribeiro	Sem Bolsa	SEM	Life Sciences	Male
Brazilian Academy of Sciences	Jose Mario Martinez Perez	CA MA - Matemática e Estatística	1A	Exact Sciences	Male
Brazilian Academy of Sciences	José Moacyr Vianna Coutinho	Sem Bolsa	SEM	Exact Sciences	Male
Brazilian Academy of Sciences	José Murilo de Carvalho	Sem Bolsa	SEM	Humanities	Male
Brazilian Academy of Sciences	José Nelson Onuchic	Sem Bolsa	SEM	Life Sciences	Male
Brazilian Academy of Sciences	José Osvaldo Previato	CA MP - Microbiologia e Parasitologia	1A	Life Sciences	Male
Brazilian Academy of Sciences	José Oswaldo de Siqueira	Sem Bolsa	SEM	Exact Sciences	Male
Brazilian Academy of Sciences	José Reinaldo Magalhães	Sem Bolsa	SEM	Exact Sciences	Male
Brazilian Academy of Sciences	José Roberto Boisson de Marca	Sem Bolsa	SEM	Exact Sciences	Male
Brazilian Academy of Sciences	José Roberto Postali Parra	CA AG - Agronomia	1A	Exact Sciences	Male
Brazilian Academy of Sciences	José Rodrigues Coura	CA SN - Saúde Coletiva e Nutrição	1B	Life Sciences	Male
Brazilian Academy of Sciences	José Tasso Felix Guimarães	Sem Bolsa	SEM	Exact Sciences	Male
Brazilian Academy of Sciences	José Xavier-Filho	Sem Bolsa	SEM	Life Sciences	Male
Brazilian Academy of Sciences	Joseph Marie Bové	Sem Bolsa	SEM	Exact Sciences	Male
Brazilian Academy of Sciences	Joseph Miller	Sem Bolsa	SEM	Exact Sciences	Male
Brazilian Academy of Sciences	Joseph Paul Marino	Sem Bolsa	SEM	Exact Sciences	Male
Brazilian Academy of Sciences	Josif Frenkel	CA FA - Física e Astronomia	1A	Exact Sciences	Male
Brazilian Academy of Sciences	Juliano Ferreira	CA BF - Biofísica, Bioquímica, Farmaco	1B	Life Sciences	Male
Brazilian Academy of Sciences	Julio Cezar Melatti	Sem Bolsa	SEM	Humanities	Male
Brazilian Academy of Sciences	Julio Scharfstein	CA IM - Imunologia	1A	Life Sciences	Male
Brazilian Academy of Sciences	Karl Otto Stöhr	Sem Bolsa	SEM	Exact Sciences	Male
Brazilian Academy of Sciences	Kenitiro Suguio	CA GC - Geociências	SR	Exact Sciences	Male
Brazilian Academy of Sciences	Kepler de Souza Oliveira Filho	CA FA - Física e Astronomia	1A	Exact Sciences	Male
Brazilian Academy of Sciences	Klaus Hafner	Sem Bolsa	SEM	Exact Sciences	Male
Brazilian Academy of Sciences	Klaus Kubitzki	Sem Bolsa	SEM	Life Sciences	Male
Brazilian Academy of Sciences	Klaus Reichardt	CA AG - Agronomia	1A	Exact Sciences	Male
Brazilian Academy of Sciences	Klaus Scherrer	Sem Bolsa	SEM	Life Sciences	Male
Brazilian Academy of Sciences	Koji Kawashita	Sem Bolsa	SEM	Exact Sciences	Male
Brazilian Academy of Sciences	Krerley Irraciel Martins Oliveira	CA MA - Matemática e Estatística	Pós-Doutorado	Exact Sciences	Male
Brazilian Academy of Sciences	Kurt Wüthrich	Sem Bolsa	SEM	Exact Sciences	Male
Brazilian Academy of Sciences	Larry Simpson	Sem Bolsa	SEM	Life Sciences	Male
Brazilian Academy of Sciences	Laurie J. Vitt	Sem Bolsa	SEM	Life Sciences	Male
Brazilian Academy of Sciences	Lauro Tatsuo Kubota	CA QU - Química	1A	Exact Sciences	Male
Brazilian Academy of Sciences	Lauro Valentim Stoll Nardi	CA GC - Geociências	1A	Exact Sciences	Male
Brazilian Academy of Sciences	Lázaro Aurélio Padilha Junior	CA FA - Física e Astronomia	2	Exact Sciences	Male
Brazilian Academy of Sciences	Leandro Helgueira Andrade	CA QU - Química	1D	Exact Sciences	Male
Brazilian Academy of Sciences	Leandro Malard Moreira	CA FA - Física e Astronomia	2	Exact Sciences	Male
Brazilian Academy of Sciences	Léo Afraneo Hartmann	CA GC - Geociências	1A	Exact Sciences	Male
Brazilian Academy of Sciences	Leonardo de Souza Menezes	CA FA - Física e Astronomia	2	Exact Sciences	Male
Brazilian Academy of Sciences	Leonardo dos Santos Avilla	Sem Bolsa	SEM	Life Sciences	Male
Brazilian Academy of Sciences	Leonardo Holanda Travassos	CA IM - Imunologia	2	Life Sciences	Male
Brazilian Academy of Sciences	Leonardo Sena Gomes Teixeira	CA QU - Química	1D	Exact Sciences	Male
Brazilian Academy of Sciences	Leôncio Martins Rodrigues Netto	Sem Bolsa	SEM	Humanities	Male
Brazilian Academy of Sciences	Leopoldo de Meis	Sem Bolsa	SEM	Life Sciences	Male
Brazilian Academy of Sciences	Leslie Bethell	Sem Bolsa	SEM	Humanities	Male
Brazilian Academy of Sciences	Lewis Joel Greene	CA BF - Biofísica, Bioquímica, Farmaco	1A	Life Sciences	Male
Brazilian Academy of Sciences	Licio Augusto Velloso	CA MD - Medicina	1A	Life Sciences	Male
Brazilian Academy of Sciences	Lindolpho de Carvalho Dias	Sem Bolsa	SEM	Exact Sciences	Male
Brazilian Academy of Sciences	Lionel Segui Gonçalves	Sem Bolsa	SEM	Life Sciences	Male
Brazilian Academy of Sciences	Liu Hsu	CA EE - Engenharia Elétrica e Bioméd	1A	Exact Sciences	Male
Brazilian Academy of Sciences	Lorenzo Justiniano Díaz Casado	CA MA - Matemática e Estatística	1A	Exact Sciences	Male
Brazilian Academy of Sciences	Louis René Martin	Sem Bolsa	SEM	Humanities	Male
Brazilian Academy of Sciences	Lucas Catão de Freitas Ferreira	CA MA - Matemática e Estatística	2	Exact Sciences	Male
Brazilian Academy of Sciences	Luciano Paulino da Silva	CA BF - Biofísica, Bioquímica, Farmaco	1D	Life Sciences	Male
Brazilian Academy of Sciences	Ludwig Dmitrievich Faddeev	Sem Bolsa	SEM	Exact Sciences	Male
Brazilian Academy of Sciences	Luis Adauto da Justa Medeiros	Sem Bolsa	SEM	Exact Sciences	Male
Brazilian Academy of Sciences	Luís Carlos Bassalo Crispino	CA FA - Física e Astronomia	1C	Exact Sciences	Male
Brazilian Academy of Sciences	Luiz Antonio Barreto de Castro	Sem Bolsa	SEM	Life Sciences	Male
Brazilian Academy of Sciences	Luiz Antonio Martinelli	CA EL - Ecologia e Limnologia	1A	Life Sciences	Male
Brazilian Academy of Sciences	Luiz Bevilacqua	CA EM - Engenharia Mecânica, Naval e Oc	1A	Exact Sciences	Male
Brazilian Academy of Sciences	Luiz Carlos Dias	CA QU - Química	1A	Exact Sciences	Male
Brazilian Academy of Sciences	Luiz Carlos Galvão Lobo	Sem Bolsa	SEM	Life Sciences	Male
Brazilian Academy of Sciences	Luiz Davidovich	CA FA - Física e Astronomia	1A	Exact Sciences	Male
Brazilian Academy of Sciences	Luiz Drude de Lacerda	CA EL - Ecologia e Limnologia	1A	Life Sciences	Male
Brazilian Academy of Sciences	Luiz Eugênio Araújo de Moraes Mello	CA BF - Biofísica, Bioquímica, Farmaco	1A	Life Sciences	Male
Brazilian Academy of Sciences	Luiz Guimarães Ferreira	Sem Bolsa	SEM	Exact Sciences	Male
Brazilian Academy of Sciences	Luiz Gustavo de Oliveira Lopes Cançado	CA FA - Física e Astronomia	2	Exact Sciences	Male
Brazilian Academy of Sciences	Luiz Gustavo Farah Dias	CA MA - Matemática e Estatística	2	Exact Sciences	Male
Brazilian Academy of Sciences	Luiz Juliano Neto	CA BF - Biofísica, Bioquímica, Farmaco	1A	Life Sciences	Male
Brazilian Academy of Sciences	Luiz Nunes de Oliveira	CA FA - Física e Astronomia	SR	Exact Sciences	Male
Brazilian Academy of Sciences	Luiz Pinguelli Rosa	CA EN - Energia Nuclear, Energia Renová	1A	Exact Sciences	Male
Brazilian Academy of Sciences	Luiz Roberto Giorgetti de Britto	CA BF - Biofísica, Bioquímica, Farmaco	1A	Life Sciences	Male
Brazilian Academy of Sciences	Luiz Rodolpho Raja Gabaglia Travassos	CA IM - Imunologia	1A	Life Sciences	Male
Brazilian Academy of Sciences	Mahir Saleh Hussein	CA FA - Física e Astronomia	1A	Exact Sciences	Male
Brazilian Academy of Sciences	Manassés Claudino Fonteles	CA BF - Biofísica, Bioquímica, Farmaco	1A	Life Sciences	Male
Brazilian Academy of Sciences	Manfredo Perdigão do Carmo	CA MA - Matemática e Estatística	1A	Exact Sciences	Male
Brazilian Academy of Sciences	Manoel Barral Netto	CA IM - Imunologia	1A	Life Sciences	Male
Brazilian Academy of Sciences	Manuel Mateus Ventura	Sem Bolsa	SEM	Life Sciences	Male
Brazilian Academy of Sciences	Mara Helena Hutz	CA GE - Genética	1A	Life Sciences	Male
Brazilian Academy of Sciences	Marc André Meyers	Sem Bolsa	SEM	Exact Sciences	Male
Brazilian Academy of Sciences	Marc G. Caron	Sem Bolsa	SEM	Life Sciences	Male
Brazilian Academy of Sciences	Marc Van Montagu	Sem Bolsa	SEM	Life Sciences	Male
Brazilian Academy of Sciences	Marcello André Barcinski	CA IM - Imunologia	SEM	Life Sciences	Male
Brazilian Academy of Sciences	Marcello Iacomini	CA BF - Biofísica, Bioquímica, Farmaco	1A	Life Sciences	Male
Brazilian Academy of Sciences	Marcelo Cancela Lisboa Cohen	CA OC - Oceanografia	1C	Exact Sciences	Male
Brazilian Academy of Sciences	Marcelo de Oliveira Terra Cunha	CA FA - Física e Astronomia	2	Exact Sciences	Male
Brazilian Academy of Sciences	Marcelo Dutra Fragoso	CA EE - Engenharia Elétrica e Bioméd	1A	Exact Sciences	Male
Brazilian Academy of Sciences	Marcelo Farina	CA BF - Biofísica, Bioquímica, Farmaco	1C	Life Sciences	Male
Brazilian Academy of Sciences	Marcelo Fernandes Furtado	CA MA - Matemática e Estatística	2	Exact Sciences	Male
Brazilian Academy of Sciences	Marcelo Menin	CA ZO - Zoologia	2	Life Sciences	Male
Brazilian Academy of Sciences	Marcelo Miranda Viana da Silva	CA MA - Matemática e Estatística	1A	Exact Sciences	Male
Brazilian Academy of Sciences	Marcelo Nazareno Vallinoto de Souza	CA GE - Genética	2	Life Sciences	Male
Brazilian Academy of Sciences	Marcelo Sousa de Assumpção	CA GC - Geociências	1B	Exact Sciences	Male
Brazilian Academy of Sciences	Marcio Gomes Soares	CA MA - Matemática e Estatística	1B	Exact Sciences	Male
Brazilian Academy of Sciences	Márcio Martins Pimentel	CA GC - Geociências	1A	Exact Sciences	Male
Brazilian Academy of Sciences	Marco Antonio Chaer do Nascimento	CA QU - Química	1A	Exact Sciences	Male
Brazilian Academy of Sciences	Marco Antônio Teixeira	CA MA - Matemática e Estatística	1B	Exact Sciences	Male
Brazilian Academy of Sciences	Marco Antonio Zago	CA MD - Medicina	1A	Life Sciences	Male
Brazilian Academy of Sciences	Marco-Aurelio De Paoli	CA QU - Química	1A	Exact Sciences	Male
Brazilian Academy of Sciences	Marcondes Lima da Costa	CA GC - Geociências	1A	Exact Sciences	Male
Brazilian Academy of Sciences	Marcos André Gonçalves	CA CC - Ciências da Computação	1D	Exact Sciences	Male
Brazilian Academy of Sciences	Marcos Assunção Pimenta	CA FA - Física e Astronomia	Pós-Doutorado	Exact Sciences	Male
Brazilian Academy of Sciences	Marcos Dajczer	CA MA - Matemática e Estatística	1A	Exact Sciences	Male
Brazilian Academy of Sciences	Marcos Nogueira Eberlin	Sem Bolsa	SEM	Exact Sciences	Male
Brazilian Academy of Sciences	Marcos Vinicius Borges Teixeira Lima	CA FA - Física e Astronomia	2	Exact Sciences	Male
Brazilian Academy of Sciences	Marcus Fernandes de Oliveira	Sem Bolsa	SEM	Life Sciences	Male
Brazilian Academy of Sciences	Marcus Vinicius Domingues	Sem Bolsa	SEM	Life Sciences	Male
Brazilian Academy of Sciences	Marcus Vinicius Gomez	CA BF - Biofísica, Bioquímica, Farmaco	1A	Life Sciences	Male
Brazilian Academy of Sciences	Marcus Vinícius Guimarães Lacerda	CA MD - Medicina	1D	Life Sciences	Male
Brazilian Academy of Sciences	Mário Jorge Dias Carneiro	Sem Bolsa	SEM	Exact Sciences	Male
Brazilian Academy of Sciences	Mario José Abdalla Saad	CA MD - Medicina	1A	Life Sciences	Male
Brazilian Academy of Sciences	Mario Veiga Ferraz Pereira	Sem Bolsa	SEM	Exact Sciences	Male
Brazilian Academy of Sciences	Martín Pablo Cammarota	Sem Bolsa	SEM	Life Sciences	Male
Brazilian Academy of Sciences	Martin Schmal	Sem Bolsa	SEM	Exact Sciences	Male
Brazilian Academy of Sciences	Maurício Barros Corrêa Júnior	CA MA - Matemática e Estatística	2	Exact Sciences	Male
Brazilian Academy of Sciences	Maurício Domingues Coutinho-Filho	CA FA - Física e Astronomia	1A	Exact Sciences	Male
Brazilian Academy of Sciences	Mauricio Lima Barreto	CA SN - Saúde Coletiva e Nutrição	1A	Life Sciences	Male
Brazilian Academy of Sciences	Maurício Matos Peixoto	Sem Bolsa	SEM	Exact Sciences	Male
Brazilian Academy of Sciences	Maurício Rocha e Silva	Sem Bolsa	SEM	Exact Sciences	Male
Brazilian Academy of Sciences	Mauro Martins Teixeira	CA BF - Biofísica, Bioquímica, Farmaco	1A	Life Sciences	Male
Brazilian Academy of Sciences	Max Cardoso Langer	CA GC - Geociências	2	Exact Sciences	Male
Brazilian Academy of Sciences	Max Luciano Birnstiel	Sem Bolsa	SEM	Life Sciences	Male
Brazilian Academy of Sciences	Meinrat O. Andreae	Sem Bolsa	SEM	Exact Sciences	Male
Brazilian Academy of Sciences	Michael Ellis Fisher	Sem Bolsa	SEM	Exact Sciences	Male
Brazilian Academy of Sciences	Michael John Brammer	Sem Bolsa	SEM	Life Sciences	Male
Brazilian Academy of Sciences	Michel Claudio Nussenzweig	Sem Bolsa	SEM	Life Sciences	Male
Brazilian Academy of Sciences	Michel Rabinovitch	Sem Bolsa	SEM	Life Sciences	Male
Brazilian Academy of Sciences	Miguel Angelo Laporta Nicolelis	Sem Bolsa	SEM	Life Sciences	Male
Brazilian Academy of Sciences	Miguel Angelo Stipp Basei	CA GC - Geociências	1B	Exact Sciences	Male
Brazilian Academy of Sciences	Milton Luiz Laquintinie Formoso	CA GC - Geociências	1A	Exact Sciences	Male
Brazilian Academy of Sciences	Milton Ozório Moraes	CA GE - Genética	1C	Life Sciences	Male
Brazilian Academy of Sciences	Mirco Solé	CA EL - Ecologia e Limnologia	2	Life Sciences	Male
Brazilian Academy of Sciences	Moacir Wajner	CA BF - Biofísica, Bioquímica, Farmaco	1A	Life Sciences	Male
Brazilian Academy of Sciences	Mortimer Mishkin	Sem Bolsa	SEM	Life Sciences	Male
Brazilian Academy of Sciences	Moyses Szklo	Sem Bolsa	SEM	Life Sciences	Male
Brazilian Academy of Sciences	Mucio Amado Continentino	CA FA - Física e Astronomia	1A	Exact Sciences	Male
Brazilian Academy of Sciences	Nathan Bessa Viana	CA FA - Física e Astronomia	2	Exact Sciences	Male
Brazilian Academy of Sciences	Nathan Jacob Berkovits	CA FA - Física e Astronomia	1A	Exact Sciences	Male
Brazilian Academy of Sciences	Nathan T. Melamed	Sem Bolsa	SEM	Exact Sciences	Male
Brazilian Academy of Sciences	Nei Fernandes de Oliveira Junior	CA FA - Física e Astronomia	1A	Exact Sciences	Male
Brazilian Academy of Sciences	Nelson Francisco Favilla Ebecken	CA EC - Engenharia Civil	1A	Exact Sciences	Male
Brazilian Academy of Sciences	Nelson Jurandi Rosa Fagundes	Sem Bolsa	SEM	Life Sciences	Male
Brazilian Academy of Sciences	Nelson Maculan Filho	CA CC - Ciências da Computação	1A	Exact Sciences	Male
Brazilian Academy of Sciences	Nelson Monteiro Vaz	Sem Bolsa	SEM	Life Sciences	Male
Brazilian Academy of Sciences	Nestor Schor	CA MD - Medicina	1A	Life Sciences	Male
Brazilian Academy of Sciences	Newton Ennis Morton	Sem Bolsa	SEM	Life Sciences	Male
Brazilian Academy of Sciences	Newton M. Barbosa Neto	CA QU - Química	2	Exact Sciences	Male
Brazilian Academy of Sciences	Nicim Zagury	CA FA - Física e Astronomia	1A	Exact Sciences	Male
Brazilian Academy of Sciences	Nicola Petragnani	Sem Bolsa	SEM	Exact Sciences	Male
Brazilian Academy of Sciences	Nils Edvin Asp Neto	CA OC - Oceanografia	2	Exact Sciences	Male
Brazilian Academy of Sciences	Niro Higuchi	CA RF - Recursos Florestais	1A	Life Sciences	Male
Brazilian Academy of Sciences	Nivio Ziviani	CA CC - Ciências da Computação	1A	Exact Sciences	Male
Brazilian Academy of Sciences	Nuno Alvares Pereira	Sem Bolsa	SEM	Life Sciences	Male
Brazilian Academy of Sciences	Olácio Dietzsch	Sem Bolsa	SEM	Exact Sciences	Male
Brazilian Academy of Sciences	Omar Abdel Moneim Abou El Seoud	CA QU - Química	1A	Exact Sciences	Male
Brazilian Academy of Sciences	Oscar Manoel Loureiro Malta	CA QU - Química	1A	Exact Sciences	Male
Brazilian Academy of Sciences	Oscar Rösler	Sem Bolsa	SEM	Exact Sciences	Male
Brazilian Academy of Sciences	Oswaldo Luiz Alves	CA QU - Química	1A	Exact Sciences	Male
Brazilian Academy of Sciences	Oswaldo Sala	Sem Bolsa	SEM	Exact Sciences	Male
Brazilian Academy of Sciences	Oswaldo Ubríaco Lopes	CA BF - Biofísica, Bioquímica, Farmaco	SR	Life Sciences	Male
Brazilian Academy of Sciences	Otávio Guilherme Cardoso Alves Velho	CA CS - Antrop., Arqueol., C. Política,	SR	Humanities	Male
Brazilian Academy of Sciences	Othon Henry Leonardos	Sem Bolsa	SEM	Exact Sciences	Male
Brazilian Academy of Sciences	Pablo Javier Blanco	CA EM - Engenharia Mecânica, Naval e Oc	2	Exact Sciences	Male
Brazilian Academy of Sciences	Paolo Piccione	CA MA - Matemática e Estatística	1B	Exact Sciences	Male
Brazilian Academy of Sciences	Paul Alexander Schweitzer	Sem Bolsa	SEM	Exact Sciences	Male
Brazilian Academy of Sciences	Paul Hagenmuller	Sem Bolsa	SEM	Exact Sciences	Male
Brazilian Academy of Sciences	Paulo Alexandre Araújo Sousa	CA MA - Matemática e Estatística	2	Exact Sciences	Male
Brazilian Academy of Sciences	Paulo Anselmo Ziani Suarez	CA QU - Química	1B	Exact Sciences	Male
Brazilian Academy of Sciences	Paulo Antônio de Souza Mourão	CA BF - Biofísica, Bioquímica, Farmaco	1A	Life Sciences	Male
Brazilian Academy of Sciences	Paulo Arruda	CA BI - Biotecnologia	1B	Life Sciences	Male
Brazilian Academy of Sciences	Paulo Domingos Cordaro	CA MA - Matemática e Estatística	1A	Exact Sciences	Male
Brazilian Academy of Sciences	Paulo Eduardo Artaxo Netto	CA FA - Física e Astronomia	1A	Exact Sciences	Male
Brazilian Academy of Sciences	Paulo Gustavo Homem Passos	CA ZO - Zoologia	2	Life Sciences	Male
Brazilian Academy of Sciences	Paulo Henrique Schneider	CA QU - Química	1D	Exact Sciences	Male
Brazilian Academy of Sciences	Paulo Marcos de Paula Vasconcelos	Sem Bolsa	SEM	Exact Sciences	Male
Brazilian Academy of Sciences	Paulo Mazzafera	CA BO - Botânica	1A	Life Sciences	Male
Brazilian Academy of Sciences	Paulo Milton Barbosa Landim	CA GC - Geociências	1D	Exact Sciences	Male
Brazilian Academy of Sciences	Paulo Murilo Castro de Oliveira	Sem Bolsa	SEM	Exact Sciences	Male
Brazilian Academy of Sciences	Paulo Roberto Grossi Sad	CA MA - Matemática e Estatística	1A	Exact Sciences	Male
Brazilian Academy of Sciences	Paulo Sergio Boggio	CA PS - Psicologia e Serviço Social	2	Humanities	Male
Brazilian Academy of Sciences	Paulo Sérgio Lacerda Beirão	CA BF - Biofísica, Bioquímica, Farmaco	1C	Life Sciences	Male
Brazilian Academy of Sciences	Paulo Sérgio Pinheiro	Sem Bolsa	SEM	Humanities	Male
Brazilian Academy of Sciences	Paulo Sérgio Santos	Sem Bolsa	SEM	Exact Sciences	Male
Brazilian Academy of Sciences	Pedro Leite da Silva Dias	CA CA - Ciências Ambientais	SR	Life Sciences	Male
Brazilian Academy of Sciences	Pedro Marcos Gomes Soares	CA MF - Morfologia	2	Life Sciences	Male
Brazilian Academy of Sciences	Pedro Nowosad	Sem Bolsa	SEM	Exact Sciences	Male
Brazilian Academy of Sciences	Pedro Rodrigues Curi Hallal	CA MS - Educação Física, Fonoaudiolog	1B	Life Sciences	Male
Brazilian Academy of Sciences	Pedro Walfir Martins e Souza Filho	CA OC - Oceanografia	1C	Exact Sciences	Male
Brazilian Academy of Sciences	Peter H. Raven	Sem Bolsa	SEM	Life Sciences	Male
Brazilian Academy of Sciences	Peter Henry Fry	CA CS - Antrop., Arqueol., C. Política,	SR	Humanities	Male
Brazilian Academy of Sciences	Philip Martin Fearnside	CA CA - Ciências Ambientais	1A	Life Sciences	Male
Brazilian Academy of Sciences	Pierre Kaufmann	Sem Bolsa	SEM	Exact Sciences	Male
Brazilian Academy of Sciences	Pierre Mothé Esteves	CA CA - Quimica	1B	Exact Sciences	Male
Brazilian Academy of Sciences	Piérre Sabaté	Sem Bolsa	SEM	Exact Sciences	Male
Brazilian Academy of Sciences	Pierre-Louis Lions	Sem Bolsa	SEM	Exact Sciences	Male
Brazilian Academy of Sciences	Protásio Lemos da Luz	Sem Bolsa	SEM	Life Sciences	Male
Brazilian Academy of Sciences	Radovan Borojevic	CA MF - Morfologia	SR	Life Sciences	Male
Brazilian Academy of Sciences	Rafael Alberto Radi Isola	Sem Bolsa	SEM	Life Sciences	Male
Brazilian Academy of Sciences	Rafael Linden	CA BF - Biofísica, Bioquímica, Farmaco	1A	Life Sciences	Male
Brazilian Academy of Sciences	Rafael Roesler	CA BF - Biofísica, Bioquímica, Farmaco	1A	Life Sciences	Male
Brazilian Academy of Sciences	Raimundo Braz Filho	CA QU - Química	SR	Exact Sciences	Male
Brazilian Academy of Sciences	Ramayana Gazzinelli	Sem Bolsa	SEM	Exact Sciences	Male
Brazilian Academy of Sciences	Ramón Latorre de la Cruz	Sem Bolsa	SEM	Life Sciences	Male
Brazilian Academy of Sciences	Raquel Giulian	CA FA - Física e Astronomia	2	Exact Sciences	Male
Brazilian Academy of Sciences	Raúl Antonino Feijóo	CA EM - Engenharia Mecânica, Naval e Oc	1A	Exact Sciences	Male
Brazilian Academy of Sciences	Regina Pekelmann Markus	CA BF - Biofísica, Bioquímica, Farmaco	1B	Life Sciences	Male
Brazilian Academy of Sciences	Reinhardt Adolfo Fuck	CA GC - Geociências	1A	Exact Sciences	Male
Brazilian Academy of Sciences	Renato de Azevedo Tribuzy	CA MA - Matemática e Estatística	1B	Exact Sciences	Male
Brazilian Academy of Sciences	Renato Machado Cotta	CA EM - Engenharia Mecânica, Naval e Oc	1A	Exact Sciences	Male
Brazilian Academy of Sciences	Renato Rodolfo Andreis	Sem Bolsa	SEM	Exact Sciences	Male
Brazilian Academy of Sciences	Renato Sérgio Balão Cordeiro	CA BF - Biofísica, Bioquímica, Farmaco	SR	Life Sciences	Male
Brazilian Academy of Sciences	Reynaldo Luiz Victoria	Sem Bolsa	SEM	Life Sciences	Male
Brazilian Academy of Sciences	Ricardo Antunes de Azevedo	CA BO - Botânica	1A	Life Sciences	Male
Brazilian Academy of Sciences	Ricardo Gattass	CA BF - Biofísica, Bioquímica, Farmaco	1B	Life Sciences	Male
Brazilian Academy of Sciences	Ricardo Ivan Ferreira da Trindade	CA GC - Geociências	1A	Exact Sciences	Male
Brazilian Academy of Sciences	Ricardo Magnus Osório Galvão	CA FA - Física e Astronomia	1A	Exact Sciences	Male
Brazilian Academy of Sciences	Ricardo Paes e Barros	Sem Bolsa	SEM	Humanities	Male
Brazilian Academy of Sciences	Ricardo Schwartz Schor	Sem Bolsa	SEM	Exact Sciences	Male
Brazilian Academy of Sciences	Ricardo Toshio Fujiwara	CA MP - Microbiologia e Parasitologia	1B	Life Sciences	Male
Brazilian Academy of Sciences	Ricardo Tostes Gazzinelli	CA IM - Imunologia	1A	Life Sciences	Male
Brazilian Academy of Sciences	Richard Arthur Reyment	Sem Bolsa	SEM	Exact Sciences	Male
Brazilian Academy of Sciences	Richard B. Frankel	Sem Bolsa	SEM	Exact Sciences	Male
Brazilian Academy of Sciences	Richard Charles Garratt	CA BF - Biofísica, Bioquímica, Farmaco	1A	Life Sciences	Male
Brazilian Academy of Sciences	Richard Gerald Weiss	Sem Bolsa	SEM	Exact Sciences	Male
Brazilian Academy of Sciences	Richard Williams	Sem Bolsa	SEM	Exact Sciences	Male
Brazilian Academy of Sciences	Robert Roussarie	Sem Bolsa	SEM	Exact Sciences	Male
Brazilian Academy of Sciences	Roberto Augusto DaMatta	CA CS - Antrop., Arqueol., C. Política,	1A	Humanities	Male
Brazilian Academy of Sciences	Roberto Aureliano Salmerón	Sem Bolsa	SEM	Exact Sciences	Male
Brazilian Academy of Sciences	Roberto Dall'Agnol	CA GC - Geociências	1A	Exact Sciences	Male
Brazilian Academy of Sciences	Roberto Docampo	Sem Bolsa	SEM	Life Sciences	Male
Brazilian Academy of Sciences	Roberto Giugliani	CA GE - Genética	1A	Life Sciences	Male
Brazilian Academy of Sciences	Roberto Kawakami Harrop Galvão	CA EE - Engenharia Elétrica e Bioméd	1D	Exact Sciences	Male
Brazilian Academy of Sciences	Roberto Leal Lobo e Silva Filho	Sem Bolsa	SEM	Exact Sciences	Male
Brazilian Academy of Sciences	Roberto Lent	CA MF - Morfologia	1A	Life Sciences	Male
Brazilian Academy of Sciences	Roberto Mendonça Faria	CA FA - Física e Astronomia	1A	Exact Sciences	Male
Brazilian Academy of Sciences	Roberto Rittner Neto	CA QU - Química	1B	Exact Sciences	Male
Brazilian Academy of Sciences	Roberto Rivelino de Melo Moreno	CA FA - Física e Astronomia	1D	Exact Sciences	Male
Brazilian Academy of Sciences	Roberto Zatz	CA MD - Medicina	1D	Life Sciences	Male
Brazilian Academy of Sciences	Robson Augusto Souza dos Santos	CA BF - Biofísica, Bioquímica, Farmaco	1A	Life Sciences	Male
Brazilian Academy of Sciences	Robson de Queiroz Monteiro	CA BF - Biofísica, Bioquímica, Farmaco	1C	Life Sciences	Male
Brazilian Academy of Sciences	Rodrigo Corrêa-Oliveira	CA IM - Imunologia	1A	Life Sciences	Male
Brazilian Academy of Sciences	Rodrigo da Silva	CA GC - Geociências	Pós-Doutorado	Exact Sciences	Male
Brazilian Academy of Sciences	Rodrigo Guerino Stábeli	CA BI - Biotecnologia	1D	Life Sciences	Male
Brazilian Academy of Sciences	Rodrigo Nemmen	CA FA - Física e Astronomia	2	Exact Sciences	Male
Brazilian Academy of Sciences	Rodrigo Reis Soares	CA AE - Administração, Contabilidade e	1C	Humanities	Male
Brazilian Academy of Sciences	Roger Chammas	CA MF - Morfologia	1B	Life Sciences	Male
Brazilian Academy of Sciences	Rogério Meneghini	Sem Bolsa	SEM	Exact Sciences	Male
Brazilian Academy of Sciences	Roland Köberle	Sem Bolsa	SEM	Exact Sciences	Male
Brazilian Academy of Sciences	Roland Vencovsky	CA AG - Agronomia	1A	Exact Sciences	Male
Brazilian Academy of Sciences	Ronald Dickman	CA FA - Física e Astronomia	1A	Exact Sciences	Male
Brazilian Academy of Sciences	Ronaldo Aloise Pilli	CA QU - Química	1A	Exact Sciences	Male
Brazilian Academy of Sciences	Roy Edward Bruns	CA QU - Química	1A	Exact Sciences	Male
Brazilian Academy of Sciences	Ruben George Oliven	CA CS - Antrop., Arqueol., C. Política,	1A	Humanities	Male
Brazilian Academy of Sciences	Rubens Belfort Mattos Junior	CA MD - Medicina	1A	Life Sciences	Male
Brazilian Academy of Sciences	Rudolf Louis Hausmann	Sem Bolsa	SEM	Life Sciences	Male
Brazilian Academy of Sciences	Rudolph Allard Johannes Trouw	CA GC - Geociências	1A	Exact Sciences	Male
Brazilian Academy of Sciences	Rui Curi	CA BF - Biofísica, Bioquímica, Farmaco	1A	Life Sciences	Male
Brazilian Academy of Sciences	Russell Alan Mittermeier	Sem Bolsa	SEM	Life Sciences	Male
Brazilian Academy of Sciences	Ruy Exel Filho	CA MA - Matemática e Estatística	1A	Exact Sciences	Male
Brazilian Academy of Sciences	Said Najati Sidki	Sem Bolsa	SEM	Exact Sciences	Male
Brazilian Academy of Sciences	Samuel Goldenberg	CA GE - Genética	1A	Life Sciences	Male
Brazilian Academy of Sciences	Samuel Wallace MacDowell	Sem Bolsa	SEM	Life Sciences	Male
Brazilian Academy of Sciences	Sandoval Carneiro Junior	Sem Bolsa	SEM	Exact Sciences	Male
Brazilian Academy of Sciences	Sara Teresinha Olalla Saad	CA MD - Medicina	1A	Life Sciences	Male
Brazilian Academy of Sciences	Serge Haroche	Sem Bolsa	SEM	Exact Sciences	Male
Brazilian Academy of Sciences	Sergio Costa Oliveira	CA IM - Imunologia	1A	Life Sciences	Male
Brazilian Academy of Sciences	Sérgio Danilo Junho Pena	CA BF - Biofísica, Bioquímica, Farmaco	1A	Life Sciences	Male
Brazilian Academy of Sciences	Sérgio Henrique Ferreira	CA BF - Biofísica, Bioquímica, Farmaco	SR	Life Sciences	Male
Brazilian Academy of Sciences	Sérgio Luis Costa Ferreira	CA QU - Química	1A	Exact Sciences	Male
Brazilian Academy of Sciences	Sergio Machado Rezende	CA FA - Física e Astronomia	1A	Exact Sciences	Male
Brazilian Academy of Sciences	Sérgio Mascarenhas de Oliveira	Sem Bolsa	SEM	Exact Sciences	Male
Brazilian Academy of Sciences	Sergio Miceli Pessôa de Barros	CA CS - Antrop., Arqueol., C. Política,	1A	Humanities	Male
Brazilian Academy of Sciences	Sérgio Olavo Pinto da Costa	CA GE - Genética	SR	Life Sciences	Male
Brazilian Academy of Sciences	Sergio Schenkman	CA MP - Microbiologia e Parasitologia	1A	Life Sciences	Male
Brazilian Academy of Sciences	Sérgio Teixeira Ferreira	CA BF - Biofísica, Bioquímica, Farmaco	1A	Life Sciences	Male
Brazilian Academy of Sciences	Sergio Verjovski de Almeida	CA BF - Biofísica, Bioquímica, Farmaco	1A	Life Sciences	Male
Brazilian Academy of Sciences	Setembrino Petri	Sem Bolsa	SEM	Exact Sciences	Male
Brazilian Academy of Sciences	Severino Alves Júnior	CA QU - Química	1B	Exact Sciences	Male
Brazilian Academy of Sciences	Sheldon E. Newhouse	Sem Bolsa	SEM	Exact Sciences	Male
Brazilian Academy of Sciences	Silvio Roberto de Azevedo Salinas	CA FA - Física e Astronomia	SR	Exact Sciences	Male
Brazilian Academy of Sciences	Simon Schwartzman	CA CS - Antrop., Arqueol., C. Política,	1A	Humanities	Male
Brazilian Academy of Sciences	Sóstenes Luiz Soares Lins	CA MA - Matemática e Estatística	SR	Exact Sciences	Male
Brazilian Academy of Sciences	Stefan Laufer	Sem Bolsa	SEM	Exact Sciences	Male
Brazilian Academy of Sciences	Stephen Patrick Walborn	CA FA - Física e Astronomia	1D	Exact Sciences	Male
Brazilian Academy of Sciences	Stephen Smale	Sem Bolsa	SEM	Exact Sciences	Male
Brazilian Academy of Sciences	Sylvio Ferraz-Mello	CA FA - Física e Astronomia	1A	Exact Sciences	Male
Brazilian Academy of Sciences	Sylvio Roberto Accioly Canuto	CA FA - Física e Astronomia	1A	Exact Sciences	Male
Brazilian Academy of Sciences	Takeshi Kodama	CA FA - Física e Astronomia	SR	Exact Sciences	Male
Brazilian Academy of Sciences	Tetsuo Yamane	Sem Bolsa	SEM	Life Sciences	Male
Brazilian Academy of Sciences	Thiago Mattar Cunha	CA BF - Biofísica, Bioquímica, Farmaco	2	Life Sciences	Male
Brazilian Academy of Sciences	Thomas Maack	Sem Bolsa	SEM	Life Sciences	Male
Brazilian Academy of Sciences	Thomas Maurice Lewiner	Sem Bolsa	SEM	Exact Sciences	Male
Brazilian Academy of Sciences	Timothy John Williams	Sem Bolsa	SEM	Life Sciences	Male
Brazilian Academy of Sciences	Umberto Giuseppe Cordani	CA GC - Geociências	1A	Exact Sciences	Male
Brazilian Academy of Sciences	Valfredo Azevedo Lemos	CA QU - Química	1C	Exact Sciences	Male
Brazilian Academy of Sciences	Valtencir Zucolotto	CA FA - Física e Astronomia	1D	Exact Sciences	Male
Brazilian Academy of Sciences	Vanderlei Salvador Bagnato	CA FA - Física e Astronomia	1A	Exact Sciences	Male
Brazilian Academy of Sciences	Vicente Antonio Vitório Girardi	CA GC - Geociências	1D	Exact Sciences	Male
Brazilian Academy of Sciences	Vicente Guilherme Toscano	Sem Bolsa	SEM	Exact Sciences	Male
Brazilian Academy of Sciences	Victor Alberto Ramos	Sem Bolsa	SEM	Exact Sciences	Male
Brazilian Academy of Sciences	Victor Carlos Pandolfelli	CA EM - Engenharia Mecânica, Naval e Oc	1A	Exact Sciences	Male
Brazilian Academy of Sciences	Victor Hugh Perry	Sem Bolsa	SEM	Life Sciences	Male
Brazilian Academy of Sciences	Victor Nussenzweig	Sem Bolsa	SEM	Life Sciences	Male
Brazilian Academy of Sciences	Virgílio Augusto Fernandes Almeida	CA CC - Ciências da Computação	1A	Exact Sciences	Male
Brazilian Academy of Sciences	Vitor Francisco Ferreira	CA QU - Química	1A	Exact Sciences	Male
Brazilian Academy of Sciences	Vittorio M. Canuto	Sem Bolsa	SEM	Exact Sciences	Male
Brazilian Academy of Sciences	Vivaldo Moura Neto	CA MF - Morfologia	1A	Life Sciences	Male
Brazilian Academy of Sciences	Wagner Farid Gattaz	CA MD - Medicina	1A	Life Sciences	Male
Brazilian Academy of Sciences	Waldemar Adam	Sem Bolsa	SEM	Exact Sciences	Male
Brazilian Academy of Sciences	Waldyr Muniz Oliva	Sem Bolsa	SEM	Exact Sciences	Male
Brazilian Academy of Sciences	Walter Araujo Zin	CA BF - Biofísica, Bioquímica, Farmaco	1A	Life Sciences	Male
Brazilian Academy of Sciences	Walter Arno Mannheimer	Sem Bolsa	SEM	Exact Sciences	Male
Brazilian Academy of Sciences	Walter Baltensperger	Sem Bolsa	SEM	Exact Sciences	Male
Brazilian Academy of Sciences	Walter Colli	CA BF - Biofísica, Bioquímica, Farmaco	SR	Life Sciences	Male
Brazilian Academy of Sciences	Walter Demetrio Gonzalez Alarcon	CA GC - Geociências	1A	Exact Sciences	Male
Brazilian Academy of Sciences	Walter Felipe Wreszinski	CA GC - Geociências	SR	Exact Sciences	Male
Brazilian Academy of Sciences	Walter Ribeiro Terra	CA BF - Biofísica, Bioquímica, Farmaco	1A	Life Sciences	Male
Brazilian Academy of Sciences	Walter Soares Leal	Sem Bolsa	SEM	Life Sciences	Male
Brazilian Academy of Sciences	Wanderley de Souza	CA MP - Microbiologia e Parasitologia	1A	Life Sciences	Male
Brazilian Academy of Sciences	Wanderley Guilherme dos Santos	Sem Bolsa	SEM	Exact Sciences	Male
Brazilian Academy of Sciences	Warren Douglas Johnson Jr.	Sem Bolsa	SEM	Life Sciences	Male
Brazilian Academy of Sciences	Warwick Estevam Kerr	Sem Bolsa	SEM	Life Sciences	Male
Brazilian Academy of Sciences	Welington Celso de Melo	CA MA - Matemática e Estatística	1A	Exact Sciences	Male
Brazilian Academy of Sciences	Wendelin Werner	Sem Bolsa	SEM	Exact Sciences	Male
Brazilian Academy of Sciences	Wilhelm Hasselbach	Sem Bolsa	SEM	Life Sciences	Male
Brazilian Academy of Sciences	William L. Klein	Sem Bolsa	SEM	Life Sciences	Male
Brazilian Academy of Sciences	William Randall Van Schmus	Sem Bolsa	SEM	Exact Sciences	Male
Brazilian Academy of Sciences	William Robert Phillips	Sem Bolsa	SEM	Exact Sciences	Male
Brazilian Academy of Sciences	William Ronald Heyer	Sem Bolsa	SEM	Life Sciences	Male
Brazilian Academy of Sciences	Willy Beçak	Sem Bolsa	SEM	Life Sciences	Male
Brazilian Academy of Sciences	Wilmar Dias da Silva	CA IM - Imunologia	1A	Life Sciences	Male
Brazilian Academy of Sciences	Wilson Savino	CA IM - Imunologia	1A	Life Sciences	Male
Brazilian Academy of Sciences	Wilson Teixeira	CA GC - Geociências	1A	Exact Sciences	Male
Brazilian Academy of Sciences	Wolf Engels	Sem Bolsa	SEM	Life Sciences	Male
Brazilian Academy of Sciences	Wolfgang Christian Pfeiffer	Sem Bolsa	SEM	Life Sciences	Male
Brazilian Academy of Sciences	Wolfgang Johannes Junk	Sem Bolsa	SEM	Life Sciences	Male
Brazilian Academy of Sciences	Wolmer Vercosa Vasconcelos	Sem Bolsa	SEM	Exact Sciences	Male
Brazilian Academy of Sciences	Xiao-Lin Wang	Sem Bolsa	SEM	Exact Sciences	Male
Brazilian Academy of Sciences	Yakov Grigorievich Sinai	Sem Bolsa	SEM	Exact Sciences	Male
Brazilian Academy of Sciences	Yociteru Hasui	Sem Bolsa	SEM	Exact Sciences	Male
Brazilian Academy of Sciences	Yogiro Hama	Sem Bolsa	SEM	Exact Sciences	Male
Brazilian Academy of Sciences	Yoshiharu Kohayakawa	CA CC - Ciências da Computação	1A	Exact Sciences	Male
Brazilian Academy of Sciences	Yoshitaka Gushikem	Sem Bolsa	SEM	Exact Sciences	Male
Brazilian Academy of Sciences	Yuan Jin Yun	CA MA - Matemática e Estatística	1B	Exact Sciences	Male
Brazilian Academy of Sciences	Yves Pierre Petroff	Sem Bolsa	SEM	Exact Sciences	Male
Brazilian Academy of Sciences	Yves Tardy	Sem Bolsa	SEM	Exact Sciences	Male
Brazilian Academy of Sciences	Zilton de Araújo Andrade	Sem Bolsa	SEM	Life Sciences	Male
Brazilian Academy of Sciences	Adriana Fontes	CA FA - Física e Astronomia	2	Exact Sciences	Female
Brazilian Academy of Sciences	Alaíde Braga de Oliveira	CA FR - Farmácia	SR	Life Sciences	Female
Brazilian Academy of Sciences	Aldina Maria Prado Barral	CA IM - Imunologia	1A	Life Sciences	Female
Brazilian Academy of Sciences	Alicia Juliana Kowaltowski	CA BF - Biofísica, Bioquímica, Farmaco	1B	Life Sciences	Female
Brazilian Academy of Sciences	Ana Carla dos Santos Bruno	Sem Bolsa	SEM	Humanities	Female
Brazilian Academy of Sciences	Ana Margarida Ribeiro Neiva	Sem Bolsa	SEM	Exact Sciences	Female
Brazilian Academy of Sciences	Ana Maria de Lauro Castrucci	CA BF - Biofísica, Bioquímica, Farmaco	1C	Life Sciences	Female
Brazilian Academy of Sciences	Ana Maria Giulietti Harley	CA BO - Botânica	SR	Life Sciences	Female
Brazilian Academy of Sciences	Ândrea Kely Campos Ribeiro dos Santos	Sem Bolsa	SEM	Life Sciences	Female
Brazilian Academy of Sciences	Andrea Simone Stucchi de Camargo Alvarez	CA FA - Física e Astronomia	1D	Exact Sciences	Female
Brazilian Academy of Sciences	Angela Maria Vianna Morgante	Sem Bolsa	SEM	Life Sciences	Female
Brazilian Academy of Sciences	Angela de Luca Rebello Wagener	CA OC - Oceanografia	1A	Exact Sciences	Female
Brazilian Academy of Sciences	Anita Jocelyne Marsaioli	CA QU - Química	1A	Exact Sciences	Female
Brazilian Academy of Sciences	Anita Dolly Panek	Sem Bolsa	SEM	Life Sciences	Female
Brazilian Academy of Sciences	Antoniana Ursine Krettli	CA MP - Microbiologia e Parasitologia	1A	Life Sciences	Female
Brazilian Academy of Sciences	Beatriz Leonor Silveira Barbuy	CA FA - Física e Astronomia	1A	Exact Sciences	Female
Brazilian Academy of Sciences	Belita Koiller	CA FA - Física e Astronomia	1A	Exact Sciences	Female
Brazilian Academy of Sciences	Berenice Bilharinho de Mendonça	CA MD - Medicina	1A	Life Sciences	Female
Brazilian Academy of Sciences	Bianca Silvana Zingales	CA BF - Biofísica, Bioquímica, Farmaco	1A	Life Sciences	Female
Brazilian Academy of Sciences	Camila Alexandrina Viana de Figueiredo	CA IM - Imunologia	2	Life Sciences	Female
Brazilian Academy of Sciences	Camila Indiani de Oliveira	CA IM - Imunologia	1D	Life Sciences	Female
Brazilian Academy of Sciences	Carminda da Cruz Landim	Não Informado	1A	Life Sciences	Female
Brazilian Academy of Sciences	Carol Hollingworth Collins	CA QU - Química	SR	Life Sciences	Female
Brazilian Academy of Sciences	Carolina Bhering de Araujo	CA MA - Matemática e Estatística	1D	Exact Sciences	Female
Brazilian Academy of Sciences	Carolina Madeira Lucci	Sem Bolsa	SEM	Life Sciences	Female
Brazilian Academy of Sciences	Carolina Palma Naveira Cotta	CA EM - Engenharia Mecânica, Naval e Oc	2	Exact Sciences	Male
Brazilian Academy of Sciences	Catarina Satie Takahashi	Sem Bolsa	SEM	Life Sciences	Female
Brazilian Academy of Sciences	Cecilia Veronica Nunez	CA BI - Biotecnologia	2	Life Sciences	Female
Brazilian Academy of Sciences	Célia Regina Ribeiro da Silva Carlini	CA BF - Biofísica, Bioquímica, Farmaco	1A	Life Sciences	Female
Brazilian Academy of Sciences	Crestina Susi Consorti	Sem Bolsa	SEM	Exact Sciences	Female
Brazilian Academy of Sciences	Cristina Maria Pinheiro de Campos	Sem Bolsa	SEM	Exact Sciences	Female
Brazilian Academy of Sciences	Daniele Aparecida Matoso	Sem Bolsa	SEM	Life Sciences	Female
Brazilian Academy of Sciences	Daniella Castanheira Bartholomeu	CA MP - Microbiologia e Parasitologia	1D	Life Sciences	Female
Brazilian Academy of Sciences	Danielle da Glória Souza	CA BF - Biofísica, Bioquímica, Farmaco	1D	Life Sciences	Female
Brazilian Academy of Sciences	Danielle Magalhães Moraes	Sem Bolsa	SEM	Exact Sciences	Male
Brazilian Academy of Sciences	Débora Foguel	CA BF - Biofísica, Bioquímica, Farmaco	1A	Life Sciences	Female
Brazilian Academy of Sciences	Denise Paulin	Sem Bolsa	SEM	Life Sciences	Female
Brazilian Academy of Sciences	Dora Selma Fix Ventura	CA PS - Psicologia e Serviço Social	1A	Humanities	Female
Brazilian Academy of Sciences	Dulciene Maria de Magalhães Queiroz	CA MD - Medicina	1A	Life Sciences	Female
Brazilian Academy of Sciences	Dyrce Lacombe de Almeida	Sem Bolsa	SEM	Life Sciences	Female
Brazilian Academy of Sciences	Eliane Volchan	CA BF - Biofísica, Bioquímica, Farmaco	1C	Life Sciences	Female
Brazilian Academy of Sciences	Eliete Bouskela	CA MD - Medicina	1B	Life Sciences	Female
Brazilian Academy of Sciences	Elisa Esther Maia Frota-Pessoa	Sem Bolsa	SEM	Exact Sciences	Female
Brazilian Academy of Sciences	Elisa Maria da Conceição Pereira Reis	CA CS - Antrop., Arqueol., C. Política,	1A	Humanities	Female
Brazilian Academy of Sciences	Elizabeth Pacheco Batista Fontes	CA GE - Genética	1A	Life Sciences	Female
Brazilian Academy of Sciences	Eloisa Biasotto Mano	CA QU - Química	SR	Exact Sciences	Female
Brazilian Academy of Sciences	Elza Salvatori Berquó	Sem Bolsa	SEM	Life Sciences	Female
Brazilian Academy of Sciences	Fabiana Simão Machado	CA IM - Imunologi	1D	Life Sciences	Female
Brazilian Academy of Sciences	Fabiola Mara Ribeiro	Sem Bolsa	SEM	Life Sciences	Female
Brazilian Academy of Sciences	Fernanda Guarino De Felice	CA BF - Biofísica, Bioquímica, Farmaco	1C	Life Sciences	Female
Brazilian Academy of Sciences	Flávia Carvalho Alcantara Gomes	CA MF - Morfologia	1C	Life Sciences	Female
Brazilian Academy of Sciences	Flávia Regina Capellotto Costa	CA EL - Ecologia e Limnologia	1D	Life Sciences	Female
Brazilian Academy of Sciences	Gisele Olimpio da Rocha	CA QU - Química	Pós-Doutorado	Exact Sciences	Female
Brazilian Academy of Sciences	Helena Bonciani Nader	CA BF - Biofísica, Bioquímica, Farmaco	1A	Life Sciences	Female
Brazilian Academy of Sciences	Helga Winge	Sem Bolsa	SEM	Life Sciences	Female
Brazilian Academy of Sciences	Heloisa de Oliveira Beraldo	CA QU - Química	1A	Exact Sciences	Female
Brazilian Academy of Sciences	Ida Vanessa Doederlein Schwartz	CA MD - Medicina	1D	Life Sciences	Female
Brazilian Academy of Sciences	Jeannine M. Yon-Kahn	Sem Bolsa	SEM	Life Sciences	Female
Brazilian Academy of Sciences	Juliana Braga Rodrigues Loureiro	CA EM - Engenharia Mecânica, Naval e Oc	2	Exact Sciences	Female
Brazilian Academy of Sciences	Jussara Marques de Almeida	CA CC - Ciências da Computação	1D	Exact Sciences	Female
Brazilian Academy of Sciences	Keti Tenenblat	CA MA - Matemática e Estatística	1A	Exact Sciences	Female
Brazilian Academy of Sciences	Kyria Santiago do Nascimento	Sem Bolsa	SEM	Life Sciences	Female
Brazilian Academy of Sciences	Laura de Mello e Souza	CA HI - História	1A	Humanities	Female
Brazilian Academy of Sciences	Leda dos Reis Castilho	CA EQ - Engenharia Química	1D	Exact Sciences	Female
Brazilian Academy of Sciences	Leny Alves Cavalcante	CA MF - Morfologia	SR	Life Sciences	Female
Brazilian Academy of Sciences	Letícia Veras Costa Lotufo	CA BF - Biofísica, Bioquímica, Farmaco	1C	Life Sciences	Female
Brazilian Academy of Sciences	Lilian Lefol Nani Guarieiro	Sem Bolsa	SEM	Exact Sciences	Female
Brazilian Academy of Sciences	Lis Ribeiro do Valle Antonelli	CA IM - Imunologia	2	Life Sciences	Female
Brazilian Academy of Sciences	Lisiane de Oliveira Porciúncula	CA BF - Biofísica, Bioquímica, Farmaco	2	Life Sciences	Female
Brazilian Academy of Sciences	Lourdes Sola	CA CS - Antrop., Arqueol., C. Política,	1A	Humanities	Female
Brazilian Academy of Sciences	Luci Cajueiro Carneiro Pereira	CA CA - Ciências Ambientais	1D	Life Sciences	Female
Brazilian Academy of Sciences	Lucia Mendonça Previato	CA MP - Microbiologia e Parasitologia	1A	Life Sciences	Female
Brazilian Academy of Sciences	Luciana Almeida da Silva	Sem Bolsa	SEM	Exact Sciences	Female
Brazilian Academy of Sciences	Luisa Lina Villa	CA MP - Microbiologia e Parasitologia	1A	Life Sciences	Female
Brazilian Academy of Sciences	Marcia Cristina Bernardes Barbosa	CA FA - Física e Astronomia	1B	Exact Sciences	Female
Brazilian Academy of Sciences	Marguerite Rinaudo	Sem Bolsa	SEM	Exact Sciences	Female
Brazilian Academy of Sciences	Maria Aparecida Soares Ruas	CA MA - Matemática e Estatística	1B	Exact Sciences	Female
Brazilian Academy of Sciences	Maria Assunção Faus da Silva Dias	Sem Bolsa	SEM	Exact Sciences	Female
Brazilian Academy of Sciences	Maria Auxiliadora Coelho Kaplan	CA QU - Química	1B	Exact Sciences	Female
Brazilian Academy of Sciences	Maria Domingues Vargas	CA QU - Química	1A	Exact Sciences	Female
Brazilian Academy of Sciences	Maria Fatima Grossi de Sa	CA BI - Biotecnologia	1A	Life Sciences	Female
Brazilian Academy of Sciences	Maria Inês Schmidt	CA SN - Saúde Coletiva e Nutrição	1A	Life Sciences	Female
Brazilian Academy of Sciences	Maria José Pacifico	CA MA - Matemática e Estatística	1A	Exact Sciences	Female
Brazilian Academy of Sciences	Maria Júlia Manso Alves	CA MP - Microbiologia e Parasitologia	SR	Life Sciences	Female
Brazilian Academy of Sciences	Maria Manuela Ligeti Carneiro da Cunha	CA CS - Antrop., Arqueol., C. Política,	2	Humanities	Female
Brazilian Academy of Sciences	Maria Marques	Sem Bolsa	SEM	Life Sciences	Female
Brazilian Academy of Sciences	Maria Martha Campos	CA BF - Biofísica, Bioquímica, Farmaco	1C	Life Sciences	Female
Brazilian Academy of Sciences	Maria Paula Cruz Schneider	CA GE - Genética	1A	Life Sciences	Female
Brazilian Academy of Sciences	Mariangela Hungria da Cunha	CA AG - Agronomia	1A	Exact Sciences	Female
Brazilian Academy of Sciences	Marina Anciães	Sem Bolsa	SEM	Life Sciences	Female
Brazilian Academy of Sciences	Marta Pinheiro	Sem Bolsa	SEM	Life Sciences	Female
Brazilian Academy of Sciences	Marta Silvia Maria Mantovani	CA GC - Geociências	SR	Exact Sciences	Female
Brazilian Academy of Sciences	Martha Vannucci	Sem Bolsa	SEM	Exact Sciences	Female
Brazilian Academy of Sciences	Mayana Zatz	CA GE - Genética	1A	Life Sciences	Female
Brazilian Academy of Sciences	Mécia Maria de Oliveira	Sem Bolsa	SEM	Life Sciences	Female
Brazilian Academy of Sciences	Mildred S. Dresselhaus	Sem Bolsa	SEM	Exact Sciences	Female
Brazilian Academy of Sciences	Mireille Dardenne	Sem Bolsa	SEM	Life Sciences	Female
Brazilian Academy of Sciences	Miriani Griselda Pastoriza	CA FA - Física e Astronomia	1A	Exact Sciences	Female
Brazilian Academy of Sciences	Monica Levy Andersen	CA BF - Biofísica, Bioquímica, Farmaco	1D	Life Sciences	Female
Brazilian Academy of Sciences	Monica Ryff Moreira Roca Vianna	CA MF - Morfologia	2	Life Sciences	Female
Brazilian Academy of Sciences	Nanuza Luiza de Menezes	CA BO - Botânica	1A	Life Sciences	Female
Brazilian Academy of Sciences	Nicole Marthe Le Douarin	Sem Bolsa	SEM	Life Sciences	Female
Brazilian Academy of Sciences	Noemia Kazue Ishikawa	CA BO - Botânica	2	Life Sciences	Female
Brazilian Academy of Sciences	Norma Maria da Costa Cruz	Sem Bolsa	SEM	Exact Sciences	Female
Brazilian Academy of Sciences	Ohara Augusto	CA BF - Biofísica, Bioquímica, Farmaco	1A	Life Sciences	Female
Brazilian Academy of Sciences	Ottilia Rodrigues Affonso Mitidieri	Sem Bolsa	SEM	Exact Sciences	Female
Brazilian Academy of Sciences	Patrícia Fernanda Schuck	CA BF - Biofísica, Bioquímica, Farma	2	Life Sciences	Female
Brazilian Academy of Sciences	Patricia Torres Bozza	CA BF - Biofísica, Bioquímica, Farmaco	1A	Life Sciences	Female
Brazilian Academy of Sciences	Rosa Muchnik de Lederkremer	Sem Bolsa	SEM	Exact Sciences	Female
Brazilian Academy of Sciences	Rosalia Mendez-Otero	CA BF - Biofísica, Bioquímica, Farmaco	1A	Life Sciences	Female
Brazilian Academy of Sciences	Ruth Sonntag Nussenzweig	Sem Bolsa	SEM	Life Sciences	Female
Brazilian Academy of Sciences	Sandra Patricia Zanotto	Sem Bolsa	SEM	Exact Sciences	Female
Brazilian Academy of Sciences	Shirley Schreier	CA BF - Biofísica, Bioquímica, Farmaco	1C	Life Sciences	Female
Brazilian Academy of Sciences	Siu Mui Tsai	CA AG - Agronomia	1A	Exact Sciences	Female
Brazilian Academy of Sciences	Susana Inés Cordoba de Torresi	CA QU - Química	1A	Exact Sciences	Female
Brazilian Academy of Sciences	Tatiana Roman	Sem Bolsa	SEM	Exact Sciences	Female
Brazilian Academy of Sciences	Thaisa Storchi-Bergmann	CA FA - Física e Astronomia	1A	Exact Sciences	Female
Brazilian Academy of Sciences	Ursula da Silveira Matte	Sem Bolsa	SEM	Life Sciences	Female
Brazilian Academy of Sciences	Valderez Pinto Ferreira	CA GC - Geociências	1A	Exact Sciences	Female
Brazilian Academy of Sciences	Vanderlan da Silva Bolzani	CA QU - Química	1A	Exact Sciences	Female
Brazilian Academy of Sciences	Vanessa Pinho da Silva	Biofísica, Bioquímica, Farmacologia, F	1D	Life Sciences	Female
Brazilian Academy of Sciences	Vanessa Rodrigues Paixão-Côrtes	Sem Bolsa	SEM	Life Sciences	Female
Brazilian Academy of Sciences	Vera Lúcia da Silva Valente Gaiesky	CA GE - Genética	1B	Life Sciences	Female
Brazilian Academy of Sciences	Virgínia Sampaio Teixeira Ciminelli	CA MM - Engenharia de Minas, Metalúrgic	1A	Exact Sciences	Female
Brazilian Academy of Sciences	Vivian Mary Barral Dodd Rumjanek	CA IM - Imunologia	1B	Life Sciences	Female
Brazilian Academy of Sciences	Yraima Moura Lopes Cordeiro	CA BF - Biofísica, Bioquímica, Farmaco	2	Life Sciences	Female
Brazilian Academy of Sciences	Yvonne Primerano Mascarenhas	CA FA - Física e Astronomia	1A	Exact Sciences	Female
Brazilian Academy of Sciences	Zuleika Picarelli Ribeiro do Valle	Sem Bolsa	SEM	Life Sciences	Female
