# Supplementary material for: Underrepresentation of women in the senior levels of Brazilian science
Source: PeerJ. 2017 Dec 19;5:e4000. doi: 10.7717/peerj.4000 (PMC5741063; doi:10.7717/peerj.4000)
Supplement: Supplemental Information 2 — Raw dataset. [file peerj-05-4000-s002.xlsx]

## Sheet: PQ holders exact sciences_1
Area	Subareas	Name	Level	Gender			Area: Exact Sciences = 3
3	51	Abilio Mateus Junior	PQ-2	2			Gender: Female = 1, Male = 2
3	51	Beatriz Leonor Silveira Barbuy	PQ-1A	1
3	51	Claudia Lucia Mendes de Oliveira	PQ-1A	1			Subareas:
3	51	Eduardo Luiz Damiani Bica	PQ-1A	2			Chemistry = 71
3	51	Jacques Raymond Daniel Lépine	PQ-1A	2			Chemical Engineering = 65
3	51	João Evangelista Steiner	PQ-1A	2			Industrial Design = 53
3	51	Jose Ademir Sales de Lima	PQ-1A	2			Nuclear Engineering = 63
3	51	José Renan de Medeiros	PQ-1A	2			Materials Engineering = 59
3	51	Kepler de Souza Oliveira Filho	PQ-1A	2			Sanitary Engineering = 55
3	51	Luiz Alberto Nicolaci da Costa	PQ-1A	2			Production Engineering = 64
3	51	Miriani Griselda Pastoriza	PQ-1A	1			Oceanography = 69
3	51	Sylvio Ferraz Mello	PQ-1A	2			Computer Science = 52
3	51	Thaisa Storchi Bergmann	PQ-1A	1			Geosciences = 72
3	51	Antônio Mário Magalhães	PQ-1B	2			Probability and Statistics = 70
3	51	Augusto Damineli Neto	PQ-1B	2			Transportation Engineering = 66
3	51	Daniela Lazzaro	PQ-1B	1			Civil Engineering = 57
3	51	Elisabete Maria de Gouveia Dal Pino	PQ-1B	1			Astronomy = 51
3	51	Jailson Souza de Alcaniz	PQ-1B	2			Aerospace Engineering = 54
3	51	Jorge Ernesto Horvath	PQ-1B	2			Mining Engineering = 61
3	51	Laerte Sodré Junior	PQ-1B	2			Marine Engineering = 62
3	51	Marcelo José Rebouças	PQ-1B	2			Biomedical Engineering = 56
3	51	Reinaldo Ramos de Carvalho	PQ-1B	2			Mathematics = 68
3	51	Roberto Cid Fernandes Junior	PQ-1B	2			Mechanical Engineering = 60
3	51	Adriana Benetti Marques Valio	PQ-1C	1			Electrical Engineering = 58
3	51	Basilio Xavier Santiago	PQ-1C	2			Physics = 67
3	51	Katia Maria Leite da Cunha	PQ-1C	1
3	51	Luis Raul Weber Abramo	PQ-1C	2
3	51	Marcos Perez Diaz	PQ-1C	2
3	51	Raymundo Baptista	PQ-1C	2
3	51	Roberto Vieira Martins	PQ-1C	2
3	51	Rodney da Silva Gomes	PQ-1C	2
3	51	Zulema Abraham	PQ-1C	1
3	51	Alberto Rodriguez Ardila	PQ-1D	2
3	51	Alexandre Humberto Andrei	PQ-1D	2
3	51	Andre Luis Batista Ribeiro	PQ-1D	2
3	51	Carlos Alexandre Wuensche de Souza	PQ-1D	2
3	51	Eduardo Janot Pacheco	PQ-1D	2
3	51	Gastão Cesar Bierrenbach Lima Neto	PQ-1D	2
3	51	Silvia Cristina Fernandes Rossi	PQ-1D	1
3	51	Silvia Helena Paixao Alencar	PQ-1D	1
3	51	Tatiana Alexandrovna Michtchenko	PQ-1D	2
3	51	Thyrso Villela Neto	PQ-1D	2
3	51	Alan Alves Brito	PQ-2	2
3	51	Alex Andre Schmidt	PQ-2	2
3	51	Alex Cavaliéri Carciofi	PQ-2	2
3	51	Alvaro Augusto Alvarez Candal	PQ-2	2
3	51	Anderson Campos Fauth	PQ-2	2
3	51	Angela Cristina Krabbe	PQ-2	1
3	51	Antonio Nemer Kanaan Neto	PQ-2	2
3	51	Carlos Guillermo Giménez de Castro	PQ-2	2
3	51	Cláudia Vilega Rodrigues	PQ-2	1
3	51	Claudio Bastos Pereira	PQ-2	2
3	51	Diana Paula Andrade Pilling Guapyassú de Oliveir	PQ-2	1
3	51	Diego Antonio Falceta Gonçalves	PQ-2	2
3	51	Eduardo Serra Cypriano	PQ-2	2
3	51	Fernando Virgilio Roig	PQ-2	2
3	51	Gabriel Armando Pellegatti Franco	PQ-2	2
3	51	Gustavo Amaral Lanfranchi	PQ-2	2
3	51	Hektor Sthenos Alves Monteiro	PQ-2	2
3	51	Heloisa Maria Boechat-Roberty	PQ-2	1
3	51	Henri Michel Pierre Plana	PQ-2	2
3	51	Jane Cristina Gregorio-Hetem	PQ-2	1
3	51	Jean Pierre Raulin	PQ-2	2
3	51	João Vital da Cunha Júnior	PQ-2	2
3	51	Joaquim Eduardo Rezende Costa	PQ-2	2
3	51	Jorge Luis Melendez Moreno	PQ-2	2
3	51	Jorge Marcio Ferreira Carvano	PQ-2	2
3	51	José Dias do Nascimento Júnior	PQ-2	2
3	51	Jose Eduardo Telles	PQ-2	2
3	51	Júlio Ignácio Bueno de Camargo	PQ-2	2
3	51	Karin Menendez-Delmestre	PQ-2	1
3	51	Leandro de Oliveira Kerber	PQ-2	2
3	51	Luciano Fraga	PQ-2	2
3	51	Lucimara Pires Martins	PQ-2	1
3	51	Marcelo Assafin	PQ-2	2
3	51	Marcelo Borges Fernandes	PQ-2	2
3	51	Marcelo Emilio	PQ-2	2
3	51	Marcio Antonio Geimba Maia	PQ-2	2
3	51	Marcos Vinicius Borges Teixeira Lima	PQ-2	2
3	51	Maria Cristina de Assis Rabello Soares	PQ-2	1
3	51	Martín Makler	PQ-2	2
3	51	Matthieu Sébastien Castro	PQ-2	2
3	51	Miguel Boavista Quartin	PQ-2	2
3	51	Oli Luiz Dors Junior	PQ-2	2
3	51	Oliver Fabio Piattella	PQ-2	2
3	51	Paula Rodrigues Teixeira Coelho	PQ-2	1
3	51	Paulo Afranio Augusto Lopes	PQ-2	2
3	51	Ramachrisna Teixeira	PQ-2	2
3	51	Reinaldo Roberto Rosa	PQ-2	2
3	51	Roberto Kalbusch Saito	PQ-2	2
3	51	Roderik Adriaan Overzier	PQ-2	2
3	51	Rodrigo Fernandes Lira de Holanda	PQ-2	2
3	51	Rodrigo Nemmen da Silva	PQ-2	2
3	51	Rogemar André Riffel	PQ-2	2
3	51	Rogério Riffel	PQ-2	2
3	51	Saulo Carneiro de Souza Silva	PQ-2	2
3	51	Thiago Signorini Gonçalves	PQ-2	2
3	51	Ulisses Barres de Almeida	PQ-2	2
3	51	Wagner Luiz Ferreira Marcolino	PQ-2	2
3	52	Alberto Henrique Frade Laender	PQ-1A	2
3	52	Antonio Alfredo Ferreira Loureiro	PQ-1A	2
3	52	Carlos José Pereira de Lucena	PQ-1A	2
3	52	Celina Miraglia Herrera de Figueiredo	PQ-1A	1
3	52	Celso da Cruz Carneiro Ribeiro	PQ-1A	2
3	52	Claudia Maria Bauzer Medeiros	PQ-1A	1
3	52	Cláudio Leonardo Lucchesi	PQ-1A	2
3	52	Edmundo Albuquerque de Souza e Silva	PQ-1A	2
3	52	Geraldo Robson Mateus	PQ-1A	2
3	52	Jayme Luiz Szwarcfiter	PQ-1A	2
3	52	Jorge Stolfi	PQ-1A	2
3	52	Jose Carlos Maldonado	PQ-1A	2
3	52	Luciano da Fontoura Costa	PQ-1A	2
3	52	Nelson Luis Saldanha da Fonseca	PQ-1A	2
3	52	Nelson Maculan Filho	PQ-1A	2
3	52	Nivio Ziviani	PQ-1A	2
3	52	Otto Carlos Muniz Bandeira Duarte	PQ-1A	2
3	52	Roberto Marcondes Cesar Junior	PQ-1A	2
3	52	Teresa Bernarda Ludermir	PQ-1A	1
3	52	Valmir Carneiro Barbosa	PQ-1A	2
3	52	Virgilio Augusto Fernandes Almeida	PQ-1A	2
3	52	Yoshiharu Kohayakawa	PQ-1A	2
3	52	Yoshiko Wakabayashi	PQ-1A	1
3	52	Agma Juci Machado Traina	PQ-1B	1
3	52	Alejandro César Frery Orgambide	PQ-1B	2
3	52	Alexandre Xavier Falcão	PQ-1B	2
3	52	André Carlos Ponce de Leon Ferreira de Carvalho	PQ-1B	2
3	52	Augusto Cezar Alves Sampaio	PQ-1B	2
3	52	Caetano Traina Junior	PQ-1B	2
3	52	Carlos Eduardo Pereira	PQ-1B	2
3	52	Clarisse Sieckenius de Souza	PQ-1B	1
3	52	Ernesto Julián Goldberg Birgin	PQ-1B	2
3	52	Fábio Protti	PQ-1B	2
3	52	Flávio Keidi Miyazawa	PQ-1B	2
3	52	Flávio Rech Wagner	PQ-1B	2
3	52	Francisco de Assis Tenorio de Carvalho	PQ-1B	2
3	52	Guido Costa Souza de Araújo	PQ-1B	2
3	52	Henrique Pacca Loureiro Luna	PQ-1B	2
3	52	Junior Barrera	PQ-1B	2
3	52	Luigi Carro	PQ-1B	2
3	52	Marcelo Finger	PQ-1B	2
3	52	Marco Antonio Casanova	PQ-1B	2
3	52	Mário Fernando Montenegro Campos	PQ-1B	2
3	52	Marta Lima de Queiros Mattoso	PQ-1B	1
3	52	Nelson Delfino d'Ávila Mascarenhas	PQ-1B	2
3	52	Paulo Augusto Silva Veloso	PQ-1B	2
3	52	Paulo Roberto Freire Cunha	PQ-1B	2
3	52	Sulamita Klein	PQ-1B	1
3	52	Abilio Pereira de Lucena Filho	PQ-1C	2
3	52	Altigran Soares da Silva	PQ-1C	2
3	52	Aluizio Fausto Ribeiro Araújo	PQ-1C	2
3	52	Ana Lucia Cetertich Bazzan	PQ-1C	1
3	52	Antonio de Padua Braga	PQ-1C	2
3	52	Carla Maria Dal Sasso Freitas	PQ-1C	1
3	52	Carlile Campos Lavor	PQ-1C	2
3	52	Carlos Becker Westphall	PQ-1C	2
3	52	Celia Picinin de Mello	PQ-1C	1
3	52	Cid Carvalho de Souza	PQ-1C	2
3	52	Corina da Costa Freitas	PQ-1C	1
3	52	Daniel Schwabe	PQ-1C	2
3	52	Djamel Fawzi Hadj Sadok	PQ-1C	2
3	52	Edleno Silva de Moura	PQ-1C	2
3	52	Eduardo Sany Laber	PQ-1C	2
3	52	Fabio Gagliardi Cozman	PQ-1C	2
3	52	Francisco Vilar Brasileiro	PQ-1C	2
3	52	Gilberto Camara Neto	PQ-1C	2
3	52	Jacob Scharcanski	PQ-1C	2
3	52	Jose Marcos Silva Nogueira	PQ-1C	2
3	52	José Palazzo Moreira de Oliveira	PQ-1C	2
3	52	Julio Cesar Sampaio do Prado Leite	PQ-1C	2
3	52	Luís da Cunha Lamb	PQ-1C	2
3	52	Luis Gustavo Nonato	PQ-1C	2
3	52	Luiz Satoru Ochi	PQ-1C	2
3	52	Manuel Menezes de Oliveira Neto	PQ-1C	2
3	52	Marcus Vinicius Soledade Poggi de Aragao	PQ-1C	2
3	52	Maria Cristina Ferreira de Oliveira	PQ-1C	1
3	52	Marley Maria Bernardes Rebuzzi Vellasco	PQ-1C	1
3	52	Odemir Martinez Bruno	PQ-1C	2
3	52	Paulo Romero Martins Maciel	PQ-1C	2
3	52	Philippe Olivier Alexandre Navaux	PQ-1C	2
3	52	Rafael Dueire Lins	PQ-1C	2
3	52	Susana Scheimberg de Makler	PQ-1C	1
3	52	Wagner Meira Junior	PQ-1C	2
3	52	Zhao Liang	PQ-1C	2
3	52	Alba Cristina Magalhães Alves de Melo	PQ-1D	1
3	52	Alceu de Souza Britto Jr	PQ-1D	2
3	52	Antonio Alberto Fernandes de Oliveira	PQ-1D	2
3	52	Arnaldo de Albuquerque Araújo	PQ-1D	2
3	52	Artur Ziviani	PQ-1D	2
3	52	Benjamín René Callejas Bedregal	PQ-1D	2
3	52	Bruno Richard Schulze	PQ-1D	2
3	52	Carlos Eduardo Ferreira	PQ-1D	2
3	52	Cecília Mary Fischer Rubira	PQ-1D	1
3	52	Célio Vinicius Neves de Albuquerque	PQ-1D	2
3	52	Claudia Maria Lima Werner	PQ-1D	1
3	52	Cristina Gomes Fernandes	PQ-1D	1
3	52	Edmundo Roberto Mauro Madeira	PQ-1D	2
3	52	Eduardo Camponogara	PQ-1D	2
3	52	Elias Procópio Duarte Júnior	PQ-1D	2
3	52	Fabian Luis Vargas	PQ-1D	2
3	52	Fabio Kon	PQ-1D	2
3	52	Flávia Coimbra Delicato	PQ-1D	1
3	52	Gerson Zaverucha	PQ-1D	2
3	52	Guilherme Horta Travassos	PQ-1D	2
3	52	Jacques Wainer	PQ-1D	2
3	52	Jano Moreira de Souza	PQ-1D	2
3	52	Joao Luiz Dihl Comba	PQ-1D	2
3	52	Joni da Silva Fraga	PQ-1D	2
3	52	José Ferreira de Rezende	PQ-1D	2
3	52	Jose Neuman de Souza	PQ-1D	2
3	52	Judith Kelner	PQ-1D	1
3	52	Jussara Marques de Almeida	PQ-1D	1
3	52	Lisandro Zambenedetti Granville	PQ-1D	2
3	52	Lúcia Maria de Assumpção Drummond	PQ-1D	1
3	52	Luerbio Faria	PQ-1D	2
3	52	Luis Alfredo Vidal de Carvalho	PQ-1D	2
3	52	Luis Henrique Maciel Kosmalski Costa	PQ-1D	2
3	52	Luiza de Macedo Mourelle	PQ-1D	1
3	52	Marcelo Henriques de Carvalho	PQ-1D	2
3	52	Marco Tulio de Oliveira Valente	PQ-1D	2
3	52	Marcos André Gonçalves	PQ-1D	2
3	52	Marcos Roberto da Silva Borges	PQ-1D	2
3	52	Maria da Graca Campos Pimentel	PQ-1D	1
3	52	Mauricio Ayala Rincon	PQ-1D	2
3	52	Nadia Nedjah	PQ-1D	1
3	52	Paulo Henrique Monteiro Borba	PQ-1D	2
3	52	Paulo Roberto Oliveira	PQ-1D	2
3	52	Renato Antonio Celso Ferreira	PQ-1D	2
3	52	Renato Portugal	PQ-1D	2
3	52	Ricardo da Silva Torres	PQ-1D	2
3	52	Sheila Regina Murgel Veloso	PQ-1D	1
3	52	Simone Dantas de Souza	PQ-1D	1
3	52	Siome Klein Goldenstein	PQ-1D	2
3	52	Adenilso da Silva Simão	PQ-2	2
3	52	Adriana Santarosa Vivacqua	PQ-2	1
3	52	Adriano Alonso Veloso	PQ-2	2
3	52	Adriano Lorena Inacio de Oliveira	PQ-2	2
3	52	Afonso Paiva Neto	PQ-2	2
3	52	Alberto Ferreira De Souza	PQ-2	2
3	52	Aldri Luiz dos Santos	PQ-2	2
3	52	Alessandro Lameiras Koerich	PQ-2	2
3	52	Alexandre Plastino de Carvalho	PQ-2	2
3	52	Alexandre Salles da Cunha	PQ-2	2
3	52	Aline Villavicencio	PQ-2	1
3	52	Ana Carolina Lorena	PQ-2	1
3	52	Ana Cristina Bicharra Garcia	PQ-2	1
3	52	Ana Paula Couto da Silva	PQ-2	1
3	52	Ana Teresa de Castro Martins	PQ-2	1
3	52	Anderson de Rezende Rocha	PQ-2	2
3	52	Anderson Maciel	PQ-2	2
3	52	André Fujita	PQ-2	2
3	52	Andre Luiz Lins de Aquino	PQ-2	2
3	52	André Ricardo Backes	PQ-2	2
3	52	André Santanchè	PQ-2	2
3	52	Anelise Munaretto Fonseca	PQ-2	1
3	52	Angelo Roncalli Alencar Brayner	PQ-2	2
3	52	Anna Helena Reali Costa	PQ-2	1
3	52	Anne Magaly de Paula Canuto	PQ-2	1
3	52	Anselmo Cardoso de Paiva	PQ-2	2
3	52	Antonio Augusto Medeiros Fröhlich	PQ-2	2
3	52	Antonio Marinho Pilla Barcellos	PQ-2	2
3	52	Antônio Tadeu Azevedo Gomes	PQ-2	2
3	52	Aristófanes Corrêa Silva	PQ-2	2
3	52	Arnaldo Vieira Moura	PQ-2	2
3	52	Aurora Trinidad Ramirez Pozo	PQ-2	1
3	52	Bruno Motta de Carvalho	PQ-2	2
3	52	Carina Friedrich Dorneles	PQ-2	1
3	52	Carlos Alberto de Jesus Martinhon	PQ-2	2
3	52	Carlos Alberto Kamienski	PQ-2	2
3	52	Carlos Alexandre Barros de Mello	PQ-2	2
3	52	Carlos Eduardo Thomaz	PQ-2	2
3	52	Carlos Henrique Costa Ribeiro	PQ-2	2
3	52	Celso Massaki Hirata	PQ-2	2
3	52	Cesar Augusto Fonticielha De Rose	PQ-2	2
3	52	Christiane Anneliese Gresse von Wangenheim	PQ-2	1
3	52	Cleonice Fátima Bracciali	PQ-2	1
3	52	Clodoveu Augusto Davis Junior	PQ-2	2
3	52	Daniel Fernandes Macedo	PQ-2	2
3	52	Daniel Macêdo Batista	PQ-2	2
3	52	Daniel Morgato Martin	PQ-2	2
3	52	Daniel Ratton Figueiredo	PQ-2	2
3	52	Daniel Sadoc Menasche	PQ-2	2
3	52	David Boris Paul Déharbe	PQ-2	2
3	52	David Corrêa Martins Junior	PQ-2	2
3	52	David Menotti Gomes	PQ-2	2
3	52	Denis Fernando Wolf	PQ-2	2
3	52	Divanilson Rodrigo de Sousa Campelo	PQ-2	2
3	52	Dorgival Olavo Guedes Neto	PQ-2	2
3	52	Edson Norberto Cáceres	PQ-2	2
3	52	Edson Prestes e Silva Júnior	PQ-2	2
3	52	Eduardo Alves do Valle Junior	PQ-2	2
3	52	Eduardo Candido Xavier	PQ-2	2
3	52	Eduardo Coelho Cerqueira	PQ-2	2
3	52	Eduardo Freire Nakamura	PQ-2	2
3	52	Eduardo Magno Lages Figueiredo	PQ-2	2
3	52	Eduardo Santana de Almeida	PQ-2	2
3	52	Edward Hermann Haeusler	PQ-2	2
3	52	Elaine Gouvêa Pimentel	PQ-2	1
3	52	Emerson Luiz do Monte Carmelo	PQ-2	2
3	52	Emilio Del Moral Hernandez	PQ-2	2
3	52	Eros Comunello	PQ-2	2
3	52	Estevam Rafael Hruschka Júnior	PQ-2	2
3	52	Eugene Francis Vinod Rebello	PQ-2	2
3	52	Evandro de Barros Costa	PQ-2	2
3	52	Fabiano Passuelo Hessel	PQ-2	2
3	52	Fabio Andre Machado Porto	PQ-2	2
3	52	Fabio Luciano Verdi	PQ-2	2
3	52	Fabrício Benevenuto de Souza	PQ-2	2
3	52	Fabrício Enembreck	PQ-2	2
3	52	Fátima de Lourdes dos Santos Nunes Marques	PQ-2	1
3	52	Fátima Nelsizeuma Sombra de Medeiros	PQ-2	1
3	52	Felipe Maia Galvão França	PQ-2	2
3	52	Felipe Rech Meneguzzi	PQ-2	2
3	52	Fernanda Araujo Baião Amorim	PQ-2	1
3	52	Fernando José Castor de Lima Filho	PQ-2	2
3	52	Fernando Magno Quintão Pereira	PQ-2	2
3	52	Fernando Vieira Paulovich	PQ-2	2
3	52	Flávia Maria Santoro	PQ-2	1
3	52	Flavio Soares Correa da Silva	PQ-2	2
3	52	Franklin de Lima Marquezino	PQ-2	2
3	52	George Darmiton da Cunha Cavalcanti	PQ-2	2
3	52	George Luiz Medeiros Teodoro	PQ-2	2
3	52	Gilson Antonio Giraldi	PQ-2	2
3	52	Gina Maira Barbosa de Oliveira	PQ-2	1
3	52	Gisele Lobo Pappa	PQ-2	1
3	52	Gordana Manic	PQ-2	1
3	52	Guilherme Pimentel Telles	PQ-2	2
3	52	Gustavo Enrique de Almeida Prado Alves Batista	PQ-2	2
3	52	Hae Yong Kim	PQ-2	2
3	52	Haroldo Fraga de Campos Velho	PQ-2	2
3	52	Haroldo Gambini Santos	PQ-2	2
3	52	Heitor Silvério Lopes	PQ-2	2
3	52	Hélio Pedrini	PQ-2	2
3	52	Hermes Senger	PQ-2	2
3	52	Horacio Antonio Braga Fernandes de Oliveira	PQ-2	2
3	52	Hugo Fuks	PQ-2	2
3	52	Jacir Luiz Bordim	PQ-2	2
3	52	Jaelson Freire Brelaz de Castro	PQ-2	2
3	52	Jaime Simão Sichman	PQ-2	2
3	52	João Eduardo Ferreira	PQ-2	2
3	52	Joao Jose Vasco Peixoto Furtado	PQ-2	2
3	52	João Paulo Andrade Almeida	PQ-2	2
3	52	João Paulo Gois	PQ-2	2
3	52	João Paulo Papa	PQ-2	2
3	52	Joaquim Bento Cavalcante Neto	PQ-2	2
3	52	Jorge Petrúcio Viana	PQ-2	2
3	52	José Antonio Fernandes de Macêdo	PQ-2	2
3	52	Jose Ricardo de Almeida Torreao	PQ-2	2
3	52	Jugurta Rosa Montalvao Filho	PQ-2	1
3	52	Julio César López Hernández	PQ-2	2
3	52	Karin Koogan Breitman	PQ-2	1
3	52	Kelvin Lopes Dias	PQ-2	2
3	52	Lau Cheuk Lung	PQ-2	2
3	52	Leandro Augusto Frata Fernandes	PQ-2	2
3	52	Leandro Nunes de Castro Silva	PQ-2	2
3	52	Leila Ribeiro	PQ-2	1
3	52	Leizer de Lima Pinto	PQ-2	2
3	52	Leliane Nunes de Barros	PQ-2	1
3	52	Leonardo Barbosa e Oliveira	PQ-2	2
3	52	Leonardo Gresta Paulino Murta	PQ-2	2
3	52	Loana Tito Nogueira	PQ-2	1
3	52	Loïc Pascal Gilles Cerf	PQ-2	2
3	52	Luci Pirmez	PQ-2	1
3	52	Lucia Catabriga	PQ-2	1
3	52	Luciana Salete Buriol	PQ-2	1
3	52	Luciano Antonio Digiampietri	PQ-2	2
3	52	Luciano Paschoal Gaspary	PQ-2	2
3	52	Luidi Gelabert Simonetti	PQ-2	2
3	52	Luis Enrique Zárate	PQ-2	2
3	52	Luis Menasché Schechter	PQ-2	2
3	52	Luiz Carlos Pessoa Albini	PQ-2	2
3	52	Luiz Chaimowicz	PQ-2	2
3	52	Luiz Fernando Rust da Costa Carmo	PQ-2	2
3	52	Luiz Filipe Menezes Vieira	PQ-2	2
3	52	Luiz Henrique Andrade Correia	PQ-2	2
3	52	Luiz Marcos Garcia Goncalves	PQ-2	2
3	52	Manoel Bezerra Campêlo Neto	PQ-2	2
3	52	Marcela Xavier Ribeiro	PQ-2	1
3	52	Marcelo Soares Pimenta	PQ-2	2
3	52	Marcelo Walter	PQ-2	2
3	52	Márcia Rosana Cerioli	PQ-2	1
3	52	Márcio de Oliveira Barros	PQ-2	2
3	52	Márcio Porto Basgalupp	PQ-2	2
3	52	Marco Antônio Pinheiro de Cristo	PQ-2	2
3	52	Marco Aurelio Cavalcanti Pacheco	PQ-2	2
3	52	Marco Aurélio Gerosa	PQ-2	2
3	52	Marco Aurélio Spohn	PQ-2	2
3	52	Marcos Antonio Simplicio Junior	PQ-2	2
3	52	Marcos Augusto Menezes Vieira	PQ-2	2
3	52	Marcos Gonçalves Quiles	PQ-2	2
3	52	Marcus Rolf Peter Ritt	PQ-2	2
3	52	Maria Cecilia Calani Baranauskas	PQ-2	1
3	52	Maria Claudia Reis Cavalcanti	PQ-2	1
3	52	Maria do Carmo Nicoletti	PQ-2	1
3	52	Maria Emília Machado Telles Walter	PQ-2	1
3	52	Maria Luiza Machado Campos	PQ-2	1
3	52	Mario Roberto Folhadela Benevides	PQ-2	2
3	52	Martin Alejandro Musicante	PQ-2	2
3	52	Maurício Ferreira Magalhães	PQ-2	2
3	52	Mauro Antonio Rincon	PQ-2	2
3	52	Mauro Sergio Pereira Fonseca	PQ-2	2
3	52	Michele Nogueira Lima	PQ-2	1
3	52	Miguel Elias Mitre Campista	PQ-2	2
3	52	Mirella Moura Moro	PQ-2	1
3	52	Mitre Costa Dourado	PQ-2	2
3	52	Mylene Christine Queiroz de Farias	PQ-2	1
3	52	Nabor das Chagas Mendonça	PQ-2	2
3	52	Nalvo Franco de Almeida Junior	PQ-2	2
3	52	Nina Sumiko Tomita Hirata	PQ-2	1
3	52	Orlando Gomes Loques Filho	PQ-2	2
3	52	Otávio Augusto Salgado Carpinteiro	PQ-2	2
3	52	Paulo André Vechiatto de Miranda	PQ-2	2
3	52	Paulo Costa Carvalho	PQ-2	2
3	52	Paulo Eduardo Santos	PQ-2	2
3	52	Paulo Henrique Lemelle Fernandes	PQ-2	2
3	52	Paulo Martins Engel	PQ-2	2
3	52	Paulo Sérgio Sausen	PQ-2	2
3	52	Pedro Jussieu de Rezende	PQ-2	2
3	52	Peter Sussner	PQ-2	2
3	52	Rafael Heitor Bordini	PQ-2	2
3	52	Rafael Prikladnicki	PQ-2	2
3	52	Raphael Carlos Santos Machado	PQ-2	2
3	52	Raquel Aparecida de Freitas Mini	PQ-2	1
3	52	Raquel Cardoso de Melo Minardi	PQ-2	1
3	52	Regivan Hugo Nunes Santiago	PQ-2	2
3	52	Renata Galante	PQ-2	1
3	52	Renata Hax Sander Reiser	PQ-2	1
3	52	Renata Maria Cardoso Rodrigues de Souza	PQ-2	1
3	52	Renata Pereira de Freitas	PQ-2	1
3	52	Renata Vieira	PQ-2	1
3	52	Renata Wassermann	PQ-2	1
3	52	Renato Antonio Krohling	PQ-2	2
3	52	Renato Mariz de Moraes	PQ-2	2
3	52	Renato Tinós	PQ-2	2
3	52	Ricardo Bastos Cavalcante Prudencio	PQ-2	2
3	52	Ricardo Farias	PQ-2	2
3	52	Ricardo Guerra Marroquim	PQ-2	2
3	52	Ricardo Martins de Abreu Silva	PQ-2	2
3	52	Ricardo Massa Ferreira Lima	PQ-2	2
3	52	Roberto Hirata Junior	PQ-2	2
3	52	Rodolfo Jardim de Azevedo	PQ-2	2
3	52	Rodrigo Fernandes de Mello	PQ-2	2
3	52	Rohit Gheyi	PQ-2	2
3	52	Rômulo Silva de Oliveira	PQ-2	2
3	52	Ronaldo Fumio Hashimoto	PQ-2	2
3	52	Ronaldo Moreira Salles	PQ-2	2
3	52	Rosa Maria Meri Leão	PQ-2	1
3	52	Rosa Maria Vicari	PQ-2	1
3	52	Roseli Aparecida Francelin Romero	PQ-2	1
3	52	Roseli Suzi Wedemann	PQ-2	1
3	52	Rudinei Goularte	PQ-2	2
3	52	Rudini Menezes Sampaio	PQ-2	2
3	52	Ruy Luiz Milidiu	PQ-2	2
3	52	Sandra Aparecida de Amo	PQ-2	1
3	52	Sebastián Alberto Urrutia	PQ-2	2
3	52	Sergio Castelo Branco Soares	PQ-2	2
3	52	Sergio Vale Aguiar Campos	PQ-2	2
3	52	Silvia Regina Vergilio	PQ-2	1
3	52	Silvio do Lago Pereira	PQ-2	2
3	52	Simone Diniz Junqueira Barbosa	PQ-2	1
3	52	Thais Vasconcelos Batista	PQ-2	1
3	52	Thiago Ferreira de Noronha	PQ-2	2
3	52	Tiago Alessandro Espinola Ferreira	PQ-2	2
3	52	Uira Kulesza	PQ-2	2
3	52	Vanessa Braganholo Murta	PQ-2	1
3	52	Vania Bogorny	PQ-2	1
3	52	Victor Almeida Campos	PQ-2	2
3	52	Vinícius Gusmão Pereira de Sá	PQ-2	2
3	52	Vivek Nigam	PQ-2	2
3	52	Viviane Pereira Moreira	PQ-2	1
3	52	Waldemar Celes Filho	PQ-2	2
3	52	William Robson Schwartz	PQ-2	2
3	52	Wu Shin-Ting	PQ-2	1
3	52	Yuri Abitbol de Menezes Frota	PQ-2	2
3	52	Zanoni Dias	PQ-2	2
3	53	Aguinaldo dos Santos	PQ-2	2
3	53	Wilson Kindlein Júnior	PQ-1A	2
3	53	Eugenio Andrés Díaz Merino	PQ-1C	2
3	53	Guilherme Silva da Cunha Lima	PQ-1D	2
3	53	Luis Carlos Paschoarelli	PQ-1D	2
3	53	Maria Cecilia Loschiavo dos Santos	PQ-1D	1
3	53	Rita Maria de Souza Couto	PQ-1D	1
3	53	Alexandre Amorim dos Reis	PQ-2	2
3	53	Carla Galvão Spinillo	PQ-2	1
3	53	Claudia Renata Mont'Alvão	PQ-2	1
3	53	Eduardo Romeiro Filho	PQ-2	2
3	53	Eliane Ayres	PQ-2	1
3	53	Fabio Ferreira da Costa Campos	PQ-2	2
3	53	Fábio Gonçalves Teixeira	PQ-2	2
3	53	Joao Fernando Marar	PQ-2	2
3	53	Júlio Carlos de Souza van der Linden	PQ-2	2
3	53	Lauren da Cunha Duarte	PQ-2	1
3	53	Leonardo Augusto Gómez Castillo	PQ-2	2
3	53	Liane Roldo	PQ-2	1
3	53	Marcelo Marcio Soares	PQ-2	2
3	53	Maria Lucia Leite Ribeiro Okimoto	PQ-2	1
3	53	Milton Luiz Horn Vieira	PQ-2	2
3	53	Priscila Lena Farias	PQ-2	1
3	53	Ricardo Triska	PQ-2	2
3	53	Rita Aparecida da Conceição Ribeiro	PQ-2	1
3	53	Rita de Castro Engler	PQ-2	1
3	53	Rosinei Batista Ribeiro	PQ-2	1
3	53	Solange Galvão Coutinho	PQ-2	1
3	53	Stephania Padovani	PQ-2	1
3	53	Walter Franklin Marques Correia	PQ-2	2
3	54	Antonio Fernando Bertachini de Almeida Prado	PQ-1A	2
3	54	Herman Jacobus Cornelis Voorwald	PQ-1A	2
3	54	Joao Luiz Filgueiras de Azevedo	PQ-1A	2
3	54	Mirabel Cerqueira Rezende	PQ-1A	1
3	54	Othon Cabo Winter	PQ-1A	2
3	54	Sergio Frascino Muller de Almeida	PQ-1A	2
3	54	Edson Cocchieri Botelho	PQ-1B	2
3	54	Fernando Manuel Ramos	PQ-1B	2
3	54	Helio Koiti Kuga	PQ-1C	2
3	54	Maria Odila Hilário Cioffi	PQ-1C	1
3	54	Jorge Otubo	PQ-1D	2
3	54	José Alexander Araújo	PQ-1D	2
3	54	José Daniel Diniz Melo	PQ-1D	2
3	54	Luis Rogerio de Oliveira Hein	PQ-1D	2
3	54	Maria do Carmo de Andrade Nono	PQ-1D	1
3	54	Pedro Teixeira Lacava	PQ-1D	2
3	54	Sandro da Silva Fernandes	PQ-1D	2
3	54	Silvia Maria Giuliatti Winter	PQ-1D	1
3	54	Tadashi Yokoyama	PQ-1D	2
3	54	André Valdetaro Gomes Cavalieri	PQ-2	2
3	54	Argemiro Soares da Silva Sobrinho	PQ-2	2
3	54	Carlos Alberto Cimini Junior	PQ-2	2
3	54	Carlos Antonio Reis Pereira Baptista	PQ-2	2
3	54	Carlos De Marqui Junior	PQ-2	2
3	54	Cassius Olivio Figueiredo Terra Ruchert	PQ-2	2
3	54	Cezar Henrique Gonzalez	PQ-2	2
3	54	Cícero Ribeiro de Lima	PQ-2	2
3	54	Danieli Aparecida Pereira Reis	PQ-2	1
3	54	Deborah Dibbern Brunelli	PQ-2	1
3	54	Eduardo Morgado Belo	PQ-2	2
3	54	Emilia Villani	PQ-2	1
3	54	Ernesto Vieira Neto	PQ-2	2
3	54	Fernando de Souza Costa	PQ-2	2
3	54	Fernando Fachini Filho	PQ-2	2
3	54	Flávio Donizeti Marques	PQ-2	2
3	54	Francisco Piorino Neto	PQ-2	2
3	54	Jean Paulo dos Santos Carvalho	PQ-2	2
3	54	Jose Atilio Fritz Fidel Rocco	PQ-2	2
3	54	José Osvaldo Rossi	PQ-2	2
3	54	Karl Heinz Kienitz	PQ-2	2
3	54	Lúcia Vieira	PQ-2	1
3	54	Luís Fernando Figueira da Silva	PQ-2	2
3	54	Luiz Carlos Gadelha de Souza	PQ-2	2
3	54	Luiz Carlos Sandoval Góes	PQ-2	2
3	54	Marcello Augusto Faraco de Medeiros	PQ-2	2
3	54	Maria Margareth da Silva	PQ-2	1
3	54	Maurício Vicente Donadon	PQ-2	2
3	54	Michelle Leali Costa	PQ-2	1
3	54	Ricardo Vieira	PQ-2	2
3	54	Rodrigo Savio Pessoa	PQ-2	2
3	54	Rogério de Moraes Oliveira	PQ-2	2
3	54	Túlio Hallak Panzera	PQ-2	2
3	54	Volnei Tita	PQ-2	2
3	54	Wilson Fernando Nogueira dos Santos	PQ-2	2
3	55	Antonio Marozzi Righetto	PQ-1A	2
3	55	Carlos Augusto de Lemos Chernicharo	PQ-1A	2
3	55	Eugenio Foresti	PQ-1A	2
3	55	José Roberto Campos	PQ-1A	2
3	55	Leo Heller	PQ-1A	2
3	55	Marcelo Zaiat	PQ-1A	2
3	55	Vajapeyam Srirangachar Srinivasan	PQ-1A	2
3	55	Eduardo Cleto Pires	PQ-1B	2
3	55	Jaime Joaquim da Silva Pereira Cabral	PQ-1B	2
3	55	José Alberto Domingues Rodrigues	PQ-1B	2
3	55	Jose Nilson Bezerra Campos	PQ-1B	2
3	55	Marcos Von Sperling	PQ-1B	2
3	55	Maria Bernadete Amâncio Varesche	PQ-1B	1
3	55	Maria Lúcia Calijuri	PQ-1B	1
3	55	Patricio Guillermo Peralta Zamora	PQ-1B	2
3	55	Rejane Helena Ribeiro da Costa	PQ-1B	1
3	55	Rosangela Bergamasco	PQ-1B	1
3	55	Abelardo Antônio de Assunção Montenegro	PQ-1C	2
3	55	Antonio Celso Dantas Antonino	PQ-1C	2
3	55	David Manuel Lelinho da Motta Marques	PQ-1C	2
3	55	Ederio Dino Bidoia	PQ-1C	2
3	55	Edson Cezar Wendland	PQ-1C	2
3	55	Francisco de Assis de Souza Filho	PQ-1C	2
3	55	Harry Edmar Schulz	PQ-1C	2
3	55	Javier Tomasella	PQ-1C	2
3	55	José Carlos de Araújo	PQ-1C	2
3	55	José Tavares de Sousa	PQ-1C	2
3	55	Luisa Fernanda Ribeiro Reis	PQ-1C	1
3	55	Magali Christe Cammarota	PQ-1C	1
3	55	Maria do Carmo Calijuri	PQ-1C	1
3	55	Suzana Maria Gico Lima Montenegro	PQ-1C	1
3	55	Valderi Duarte Leite	PQ-1C	2
3	55	Adrianus Cornelius Van Haandel	PQ-1D	2
3	55	André Bezerra dos Santos	PQ-1D	2
3	55	Asher Kiperstok	PQ-1D	2
3	55	Eduardo Bessa Azevedo	PQ-1D	2
3	55	Flávio Rubens Lapolli	PQ-1D	2
3	55	Francisco Suetonio Bastos Mota	PQ-1D	2
3	55	Henry Xavier Corseuil	PQ-1D	2
3	55	Luiz Antonio Daniel	PQ-1D	2
3	55	Marcia Marques Gomes	PQ-1D	1
3	55	Marcio Benedito Baptista	PQ-1D	2
3	55	Marcos Roberto de Vasconcelos Lanza	PQ-1D	2
3	55	Mario Takayuki Kato	PQ-1D	2
3	55	Mauro da Cunha Naghettini	PQ-1D	2
3	55	Nelson Luís da Costa Dias	PQ-1D	2
3	55	Nilo de Oliveira Nascimento	PQ-1D	2
3	55	Rafael Kopschitz Xavier Bastos	PQ-1D	2
3	55	Roque Passos Piveli	PQ-1D	2
3	55	Adilson Pinheiro	PQ-2	2
3	55	Alexandra Rodrigues Finotti	PQ-2	2
3	55	Amilcar Machulek Junior	PQ-2	2
3	55	André Luiz Lopes da Silveira	PQ-2	2
3	55	Ann Honor Mounteer	PQ-2	1
3	55	Armando Borges de Castilhos Junior	PQ-2	2
3	55	Bruno Coraucci Filho	PQ-2	2
3	55	Carlos de Oliveira Galvão	PQ-2	2
3	55	Cesar Rossas Mota Filho	PQ-2	2
3	55	Cristiano Das Neves Almeida	PQ-2	2
3	55	Cristiano Poleto	PQ-2	2
3	55	Cristovão Vicente Scapulatempo Fernandes	PQ-2	2
3	55	Cynara de Lourdes da Nóbrega Cunha	PQ-2	1
3	55	Daniele Maia Bila	PQ-2	1
3	55	Denise Alves Fungaro	PQ-2	2
3	55	Edson Luiz Silva	PQ-2	2
3	55	Eduardo Mario Mendiondo	PQ-2	2
3	55	Eduardo Sávio Passos Rodrigues Martins	PQ-2	2
3	55	Eduardo Soares de Souza	PQ-2	2
3	55	Eduardo Von Sperling	PQ-2	2
3	55	Francisco de Assis Salviano de Sousa	PQ-2	2
3	55	Frederico Fábio Mauad	PQ-2	2
3	55	Geoffroy Roger Pointer Malpass	PQ-2	1
3	55	Giovana Tommaso	PQ-2	2
3	55	Heber Pimentel Gomes	PQ-2	2
3	55	Henrique de Melo Lisboa	PQ-2	1
3	55	Iolanda Cristina Silveira Duarte	PQ-2	2
3	55	Jean Paolo Gomes Minella	PQ-2	2
3	55	João Alberto Ferreira	PQ-2	2
3	55	João Vicente de Assunção	PQ-2	2
3	55	Joel Avruch Goldenfum	PQ-2	2
3	55	Jose Almir Cirilo	PQ-2	2
3	55	José Roberto Guimarães	PQ-2	2
3	55	José Romualdo de Sousa Lima	PQ-2	2
3	55	Juacyara Carbonelli Campos	PQ-2	1
3	55	Jussara Cabral Cruz	PQ-2	1
3	55	Lisete Celina Lange	PQ-2	1
3	55	Luciane Maria Colla	PQ-2	1
3	55	Luiz Alberto Ribeiro Mendonça	PQ-2	2
3	55	Marcelo Giovanela	PQ-2	2
3	55	Marcelo Gomes Miguez	PQ-2	2
3	55	Marcelo Libânio	PQ-2	2
3	55	Marcelo Loureiro Garcia	PQ-2	2
3	55	Márcia Maria Rios Ribeiro	PQ-2	1
3	55	Márcia Regina da Silva Fagundes	PQ-2	1
3	55	María Ángeles Lobo Recio	PQ-2	1
3	55	Maria Cristina Borba Braga	PQ-2	1
3	55	Maria da Gloria Alves	PQ-2	1
3	55	Maria de Lourdes Florencio dos Santos	PQ-2	1
3	55	Maria do Carmo Martins Sobral	PQ-2	1
3	55	Maria Tereza Pepe Razzolini	PQ-2	1
3	55	Masato Kobiyama	PQ-2	2
3	55	Maurício Alves da Motta Sobrinho	PQ-2	2
3	55	Mauricio Dziedzic	PQ-2	2
3	55	Mônica Cristina Teixeira	PQ-2	1
3	55	Monica Ferreira do Amaral Porto	PQ-2	1
3	55	Mônica Maria Diniz Leão	PQ-2	1
3	55	Paula Loureiro Paulo	PQ-2	1
3	55	Paulo Belli Filho	PQ-2	2
3	55	Rodrigo Josemar Seminoti Jacques	PQ-2	2
3	55	Rosana de Cassia de Souza Schneider	PQ-2	1
3	55	Rosires Catão Curi	PQ-2	2
3	55	Sandra Aparecida Furlan	PQ-2	1
3	55	Sandro Froehner	PQ-2	2
3	55	Sergio Francisco de Aquino	PQ-2	2
3	55	Silvana Audra Cutolo	PQ-2	1
3	55	Silvia Maria Alves Correa Oliveira	PQ-2	1
3	55	Suzana Maria Ratusznei	PQ-2	1
3	55	Tadeu Fabricio Malheiros	PQ-2	2
3	55	Tarciso Cabral da Silva	PQ-2	2
3	55	Ticiana Marinho de Carvalho Studart	PQ-2	1
3	55	Valdir Schalch	PQ-2	2
3	55	William Gerson Matias	PQ-2	2
3	55	Wilson Fadlo Curi	PQ-2	2
3	55	Wilton Silva Lopes	PQ-2	2
3	56	Ademir de Jesus Amaral	PQ-2	2
3	56	Alberto Cliquet Junior	PQ-1A	2
3	56	Andre Fabio Kohn	PQ-1A	2
3	56	Antonio Fernando Catelli Infantosi	PQ-1A	2
3	56	Joao Carlos Machado	PQ-1A	2
3	56	Jose Wilson Magalhaes Bassani	PQ-1A	2
3	56	Sergio Shiguemi Furuie	PQ-1A	2
3	56	Aparecido Augusto de Carvalho	PQ-1B	2
3	56	Eduardo Tavares Costa	PQ-1B	2
3	56	Idagene Aparecida Cestari	PQ-1B	1
3	56	Jurandir Nadal	PQ-1B	2
3	56	Marcio Nogueira de Souza	PQ-1B	2
3	56	Wagner Coelho de Albuquerque Pereira	PQ-1B	2
3	56	Antonio Adilton Oliveira Carneiro	PQ-1C	2
3	56	Antonio Carlos Roque da Silva Filho	PQ-1C	2
3	56	Eliana Aparecida de Rezende Duek	PQ-1C	1
3	56	Laecio Carvalho de Barros	PQ-1C	2
3	56	Luiz Henrique Alves Monteiro	PQ-1C	2
3	56	Adriano de Oliveira Andrade	PQ-1D	2
3	56	Airton Abrahao Martin	PQ-1D	2
3	56	Allan Kardec Duailibe Barros Filho	PQ-1D	2
3	56	Antônio Carlos Shimano	PQ-1D	2
3	56	Antonio Mauricio Ferreira Leite Miranda de Sá	PQ-1D	2
3	56	Antônio-Carlos Guimarães de Almeida	PQ-1D	2
3	56	Carlos Dias Maciel	PQ-1D	2
3	56	Ernane José Xavier Costa	PQ-1D	2
3	56	Flavio Fonseca Nobre	PQ-1D	2
3	56	Frederico Caetano Jandre de Assis Tavares	PQ-1D	2
3	56	Homero Schiabel	PQ-1D	2
3	56	Luiz Antonio Baccalá	PQ-1D	2
3	56	Marco Antonio Gutierrez	PQ-1D	2
3	56	Maurício Cagy	PQ-1D	2
3	56	Paulo José Abatti	PQ-1D	2
3	56	Paulo Mazzoncini de Azevedo Marques	PQ-1D	2
3	56	Pedro Lopes de Melo	PQ-1D	2
3	56	Percy Nohama	PQ-1D	2
3	56	Renan Moritz Varnier Rodrigues de Almeida	PQ-1D	2
3	56	Rodrigo Capobianco Guido	PQ-1D	2
3	56	Adriano Alves Pereira	PQ-2	2
3	56	Alessandro Beda	PQ-2	2
3	56	Alexandre Visintainer Pino	PQ-2	2
3	56	Ana Maria Guimarães Guerreiro	PQ-2	1
3	56	Anderson Zanardi de Freitas	PQ-2	2
3	56	Andre Victor Alvarenga	PQ-2	2
3	56	Anselmo Frizera Neto	PQ-2	2
3	56	Antônio Márcio Rodrigues	PQ-2	2
3	56	Arlindo Neto Montagnoli	PQ-2	2
3	56	Arturo Forner Cordero	PQ-2	2
3	56	Carlos Ernesto Garrido Salmon	PQ-2	2
3	56	Carlos Julio Tierra Criollo	PQ-2	2
3	56	Carlos Marcelo Gurjão de Godoy	PQ-2	2
3	56	Francisco Assis de Oliveira Nascimento	PQ-2	2
3	56	Gesse Eduardo Calvo Nogueira	PQ-2	2
3	56	Henrique Takachi Moriya	PQ-2	2
3	56	Koichi Sameshima	PQ-2	2
3	56	Landulfo Silveira Junior	PQ-2	2
3	56	Leonardo Bonato Felix	PQ-2	2
3	56	Marat Rafikov	PQ-2	2
3	56	Martha Simões Ribeiro	PQ-2	1
3	56	Renato Amaro Zângaro	PQ-2	2
3	56	Renato Evangelista de Araujo	PQ-2	2
3	56	Ricardo José Ferrari	PQ-2	2
3	56	Roberto Hübler	PQ-2	2
3	56	Rodrigo Weber dos Santos	PQ-2	2
3	57	Alvaro Luiz Gayoso de Azeredo Coutinho	PQ-1A	2
3	57	Armando Miguel Awruch	PQ-1A	2
3	57	Carlos Torres Formoso	PQ-1A	2
3	57	Ennio Marques Palmeira	PQ-1A	2
3	57	Eurípedes do Amaral Vargas Junior	PQ-1A	2
3	57	Fernando Schnaid	PQ-1A	2
3	57	Jose Claudio de Faria Telles	PQ-1A	2
3	57	Khosrow Ghavami	PQ-1A	2
3	57	Luiz Landau	PQ-1A	2
3	57	Marcelo Gattass	PQ-1A	2
3	57	Marcio de Souza Soares de Almeida	PQ-1A	2
3	57	Mounir Khalil El Debs	PQ-1A	2
3	57	Nelson Francisco Favilla Ebecken	PQ-1A	2
3	57	Ney Augusto Dumont	PQ-1A	2
3	57	Nilo Cesar Consoli	PQ-1A	2
3	57	Paulo Batista Gonçalves	PQ-1A	2
3	57	Paulo de Mattos Pimenta	PQ-1A	2
3	57	Roberto Francisco de Azevedo	PQ-1A	2
3	57	Roberto Lamberts	PQ-1A	2
3	57	Romildo Dias Toledo Filho	PQ-1A	2
3	57	Ronaldo Carvalho Battista	PQ-1A	2
3	57	Samir Maghous	PQ-1A	2
3	57	Tacio Mauro Pereira de Campos	PQ-1A	2
3	57	Vanderley Moacyr John	PQ-1A	2
3	57	Webe João Mansur	PQ-1A	2
3	57	Willy Alvarenga Lacerda	PQ-1A	2
3	57	Carlos Magluta	PQ-1B	2
3	57	Claudio Fernando Mahler	PQ-1B	2
3	57	Denise Carpena Coitinho Dal Molin	PQ-1B	1
3	57	Djenane Cordeiro Pamplona	PQ-1B	1
3	57	Eduardo de Miranda Batista	PQ-1B	2
3	57	Eduardo de Moraes Rego Fairbairn	PQ-1B	2
3	57	Guilherme Sales Soares de Azevedo Melo	PQ-1B	2
3	57	Holmer Savastano Junior	PQ-1B	2
3	57	Humberto Breves Coda	PQ-1B	2
3	57	Humberto Ramos Roman	PQ-1B	2
3	57	José Antonio Marques Carrer	PQ-1B	2
3	57	Jose Camapum de Carvalho	PQ-1B	2
3	57	José Fernando Thomé Jucá	PQ-1B	2
3	57	José Luis Drummond Alves	PQ-1B	2
3	57	Laura Maria Goretti da Motta	PQ-1B	1
3	57	Luiz Fernando Campos Ramos Martha	PQ-1B	2
3	57	Marcio Muniz de Farias	PQ-1B	2
3	57	Maria Alba Cincotto	PQ-1B	1
3	57	Mauricio Ehrlich	PQ-1B	2
3	57	Ney Roitman	PQ-1B	2
3	57	Orencio Monje Vilar	PQ-1B	2
3	57	Osni Jose Pejon	PQ-1B	2
3	57	Pedro Colmar Gonçalves da Silva Vellasco	PQ-1B	2
3	57	Philippe Jean Paul Gleize	PQ-1B	2
3	57	Reyolando Manoel Lopes Rebello da Fonseca Brasil	PQ-1B	2
3	57	Roberto Quental Coutinho	PQ-1B	2
3	57	Sebastiao Arthur Lopes de Andrade	PQ-1B	2
3	57	Tulio Nogueira Bittencourt	PQ-1B	2
3	57	Vahan Agopyan	PQ-1B	2
3	57	Breno Pinheiro Jacob	PQ-1C	2
3	57	Carlos Eduardo Nigro Mazzilli	PQ-1C	2
3	57	Edison Castro Prates de Lima	PQ-1C	2
3	57	Enedir Ghisi	PQ-1C	2
3	57	Estevam Barbosa de Las Casas	PQ-1C	2
3	57	Euclides de Mesquita Neto	PQ-1C	2
3	57	Fernando Antônio Medeiros Marinho	PQ-1C	2
3	57	Fernando Artur Brasil Danziger	PQ-1C	2
3	57	Janaíde Cavalcante Rocha	PQ-1C	1
3	57	Jorge Augusto Pereira Ceratti	PQ-1C	2
3	57	Jorge Barbosa Soares	PQ-1C	2
3	57	José Antonio Fontes Santiago	PQ-1C	2
3	57	Jose Elias Laier	PQ-1C	2
3	57	José Guilherme Santos da Silva	PQ-1C	2
3	57	Luis Volnei Sudati Sagrilo	PQ-1C	2
3	57	Luiz Fernando Mahlmann Heineck	PQ-1C	2
3	57	Philippe Remy Bernard Devloo	PQ-1C	2
3	57	Sandro Lemos Machado	PQ-1C	2
3	57	Sergio Augusto Barreto da Fontoura	PQ-1C	2
3	57	Sergio Persival Baroncini Proenca	PQ-1C	2
3	57	Silvana Maria Bastos Afonso da Silva	PQ-1C	1
3	57	Walter Collischonn	PQ-1C	2
3	57	Acir Mércio Loredo-Souza	PQ-1D	2
3	57	Almir Sales	PQ-1D	2
3	57	Americo Campos Filho	PQ-1D	2
3	57	Ana Lucia Homce de Cresce El Debs	PQ-1D	1
3	57	André Teófilo Beck	PQ-1D	2
3	57	Antenor Braga Paraguassú	PQ-1D	2
3	57	Bernadete Ragoni Danziger	PQ-1D	1
3	57	Christianne de Lyra Nogueira	PQ-1D	1
3	57	Dario Cardoso de Lima	PQ-1D	2
3	57	Delfim Soares Júnior	PQ-1D	2
3	57	Edgar Vladimiro Mantilla Carrasco	PQ-1D	2
3	57	Fernando Luiz Bastos Ribeiro	PQ-1D	2
3	57	Fernando Saboya Albuquerque Junior	PQ-1D	2
3	57	Francisco Antonio Rocco Lahr	PQ-1D	2
3	57	Francisco Célio de Araújo	PQ-1D	2
3	57	Gabriel de Oliveira Ribeiro	PQ-1D	2
3	57	Geraldo Cechella Isaia	PQ-1D	2
3	57	Gibson Rocha Meira	PQ-1D	2
3	57	Gilberto Bruno Ellwanger	PQ-1D	2
3	57	Glicério Trichês	PQ-1D	2
3	57	Ibrahim Abd El Malik Shehata	PQ-1D	2
3	57	Izabel Christina d'Almeida Duarte de Azevedo	PQ-1D	1
3	57	Joao Batista de Paiva	PQ-1D	2
3	57	João Batista Marques de Sousa Junior	PQ-1D	2
3	57	José Luiz Antunes de Oliveira e Sousa	PQ-1D	2
3	57	José Tadeu Balbo	PQ-1D	2
3	57	Leonardo José do Nascimento Guimarães	PQ-1D	2
3	57	Leticia Fleck Fadel Miguel	PQ-1D	1
3	57	Liedi Legi Bariani Bernucci	PQ-1D	1
3	57	Lucila Chebel Labaki	PQ-1D	1
3	57	Luiz Antonio Bressani	PQ-1D	2
3	57	Luiz Carlos Pinto da Silva Filho	PQ-1D	2
3	57	Malik Cheriaf	PQ-1D	2
3	57	Marcus Peigas Pacheco	PQ-1D	2
3	57	Maria Eugenia Gimenez Boscov	PQ-1D	1
3	57	Michèle Schubert Pfeil	PQ-1D	1
3	57	Miguel Aloysio Sattler	PQ-1D	2
3	57	Osvaldo Luís Manzoli	PQ-1D	2
3	57	Paulo Sollero	PQ-1D	2
3	57	Rafael Alves de Souza	PQ-1D	2
3	57	Rafael Giuliano Pileggi	PQ-1D	2
3	57	Renato Pinto da Cunha	PQ-1D	2
3	57	Ricardo Hallal Fakury	PQ-1D	2
3	57	Sandro Marden Torres	PQ-1D	2
3	57	Washington Peres Núñez	PQ-1D	2
3	57	William Taylor Matias Silva	PQ-1D	2
3	57	Adair Roberto Aguiar	PQ-2	2
3	57	Adalberto Leandro Faxina	PQ-2	2
3	57	Adriano Rolim da Paz	PQ-2	2
3	57	Afonso Celso de Castro Lemonge	PQ-2	2
3	57	Alexandre Abrahão Cury	PQ-2	2
3	57	Alexandre Landesmann	PQ-2	2
3	57	Alexandre Luis Braun	PQ-2	2
3	57	Alexandre Rodrigues Pacheco	PQ-2	2
3	57	Álvaro José Back	PQ-2	2
3	57	Ana Cristina Castro Fontenla Sieira	PQ-2	1
3	57	Ana Paula Kirchheim	PQ-2	1
3	57	André Luís Brasil Cavalcante	PQ-2	2
3	57	Angela Borges Masuero	PQ-2	1
3	57	Angelo Vieira Mendonça	PQ-2	2
3	57	Antonio Alves Dias	PQ-2	2
3	57	Antonio Domingues de Figueiredo	PQ-2	2
3	57	Antonio Eduardo Bezerra Cabral	PQ-2	2
3	57	Antonio Luiz Guerra Gastaldini	PQ-2	2
3	57	Antonio Maria Claret de Gouveia	PQ-2	2
3	57	Antonio Thomé	PQ-2	2
3	57	Ariovaldo Denis Granja	PQ-2	2
3	57	Arlene Maria Cunha Sarmanho	PQ-2	1
3	57	Armando Lopes Moreno Junior	PQ-2	2
3	57	Beatriz de Souza Leite Pires de Lima	PQ-2	1
3	57	Branca Freitas de Oliveira	PQ-2	1
3	57	Caroline Angulski da Luz	PQ-2	1
3	57	Celso Augusto Guimarães Santos	PQ-2	2
3	57	Claudio de Souza Kazmierczak	PQ-2	2
3	57	Claudio José Cavalcante Blanco	PQ-2	2
3	57	Consuelo Alves da Frota	PQ-2	1
3	57	Cristina de Hollanda Cavalcanti Tsuha	PQ-2	1
3	57	Daniel de Lima Araújo	PQ-2	2
3	57	Daniel Veras Ribeiro	PQ-2	2
3	57	Deane de Mesquita Roehl	PQ-2	1
3	57	Dênio Ramam Carvalho de Oliveira	PQ-2	2
3	57	Denise Bernaud Maghous	PQ-2	1
3	57	Denise Maria Soares Gerscovich	PQ-2	1
3	57	Edson Denner Leonel	PQ-2	2
3	57	Eduardo Antonio Gomes Marques	PQ-2	2
3	57	Eduardo Bittencourt	PQ-2	2
3	57	Eduardo de Morais Barreto Campello	PQ-2	2
3	57	Eduardo Nobre Lages	PQ-2	2
3	57	Eduardo Toledo Santos	PQ-2	2
3	57	Elisabeth Ritter	PQ-2	1
3	57	Enio José Pazini Figueiredo	PQ-2	2
3	57	Evandro Parente Junior	PQ-2	2
3	57	Felício Bruzzi Barros	PQ-2	2
3	57	Fernando Akira Kurokawa	PQ-2	2
3	57	Fernando Pelisser	PQ-2	2
3	57	Flávio de Andrade Silva	PQ-2	2
3	57	Flávio de Souza Barbosa	PQ-2	2
3	57	Francisco Carlos Rodrigues	PQ-2	2
3	57	Francisco de Paula Simões Lopes Gastal	PQ-2	2
3	57	Francisco Evangelista Junior	PQ-2	2
3	57	Frederico Martins Alves da Silva	PQ-2	2
3	57	Gabriela Rezende Fernandes	PQ-2	1
3	57	George de Paula Bernardes	PQ-2	2
3	57	Geraldo de Freitas Maciel	PQ-2	2
3	57	Gilson de Farias Neves Gitirana Junior	PQ-2	2
3	57	Gladis Camarini	PQ-2	1
3	57	Guilherme Aris Parsekian	PQ-2	2
3	57	Gustavo de Castro Xavier	PQ-2	2
3	57	Helena Carasek	PQ-2	1
3	57	Heraldo Luiz Giacheti	PQ-2	2
3	57	Humberto Correia Lima Júnior	PQ-2	2
3	57	Inácio Benvegnu Morsch	PQ-2	2
3	57	Ivaldo Dário da Silva Pontes Filho	PQ-2	2
3	57	Ivo José Padaratz	PQ-2	2
3	57	Jardel Pereira Gonçalves	PQ-2	2
3	57	Joao Adriano Rossignolo	PQ-2	2
3	57	Jonas Alexandre	PQ-2	2
3	57	Jorge Munaiar Neto	PQ-2	2
3	57	Jose Eduardo Rodrigues	PQ-2	2
3	57	José Julio de Cerqueira Pituba	PQ-2	2
3	57	Jose Luis Vital de Brito	PQ-2	2
3	57	Jose Marcio Fonseca Calixto	PQ-2	2
3	57	José Renato Mendes de Sousa	PQ-2	2
3	57	Juliano Fiorelli	PQ-2	2
3	57	Kai Loh	PQ-2	1
3	57	Kamilla Vasconcelos Savasini	PQ-2	1
3	57	Karla Salvagni Heineck	PQ-2	1
3	57	Katia Vanessa Bicalho	PQ-2	1
3	57	Leandro Fleck Fadel Miguel	PQ-2	2
3	57	Leandro Palermo Junior	PQ-2	2
3	57	Lícia Mouta da Costa	PQ-2	1
3	57	Lidia da Conceicao Domingues Shehata	PQ-2	1
3	57	Lúcia Helena de Oliveira	PQ-2	1
3	57	Luciano Rodrigues Ornelas de Lima	PQ-2	2
3	57	Luiz Alkimin de Lacerda	PQ-2	2
3	57	Marcelo Greco	PQ-2	2
3	57	Marcelo Maia Rocha	PQ-2	2
3	57	Marcilio Sousa da Rocha Freitas	PQ-2	2
3	57	Marco Aurélio Stumpf González	PQ-2	2
3	57	Maria das Graças Gardoni Almeida	PQ-2	1
3	57	Maria Esther Soares Marques	PQ-2	1
3	57	Marina Sangoi de Oliveira Ilha	PQ-2	1
3	57	Marlova Piva Kulakowski	PQ-2	1
3	57	Marta de Souza Lima Velasco	PQ-2	1
3	57	Maurício de Pina Ferreira	PQ-2	2
3	57	Mauricio Mancio	PQ-2	2
3	57	Maximiliano Malite	PQ-2	2
3	57	Michèle Cristina Resende Farage	PQ-2	1
3	57	Michéle Dal Toé Casagrande	PQ-2	1
3	57	Mildred Ballin Hecke	PQ-2	1
3	57	Milene Sabino Lana	PQ-2	1
3	57	Miriam de Fátima Carvalho	PQ-2	1
3	57	Moacir Kripka	PQ-2	2
3	57	Nilza Maria dos Reis Castro	PQ-2	1
3	57	Olavo Francisco dos Santos Júnior	PQ-2	2
3	57	Oswaldo Cascudo	PQ-2	2
3	57	Patricia Habib Hallak	PQ-2	1
3	57	Paulo César Lodi	PQ-2	2
3	57	Paulo José Rocha de Albuquerque	PQ-2	2
3	57	Paulo Roberto de Freitas Teixeira	PQ-2	2
3	57	Pedro Domingos Marques Prietto	PQ-2	2
3	57	Poliana Dias de Moraes	PQ-2	1
3	57	Rafael Holdorf Lopez	PQ-2	2
3	57	Reinaldo Lorandi	PQ-2	2
3	57	Rejane Nascentes	PQ-2	1
3	57	Ricardo Azoubel da Mota Silveira	PQ-2	2
3	57	Rinaldo Jose Barbosa Pinheiro	PQ-2	2
3	57	Roberto Caldas de Andrade Pinto	PQ-2	2
3	57	Roberto Dalledone Machado	PQ-2	2
3	57	Roberto Leal Pimentel	PQ-2	2
3	57	Rodrigo Barreto Caldas	PQ-2	2
3	57	Rodrigo Martins Reis	PQ-2	2
3	57	Romero César Gomes	PQ-2	2
3	57	Ronaldo Barros Gomes	PQ-2	2
3	57	Roque Luiz da Silva Pitangueira	PQ-2	2
3	57	Ruy Carlos Ramos de Menezes	PQ-2	2
3	57	Sérgio Cirelli Angulo	PQ-2	2
3	57	Sergio Scheer	PQ-2	2
3	57	Sérgio Tibana	PQ-2	2
3	57	Severino Pereira Cavalcanti Marques	PQ-2	2
3	57	Sidarta Araújo de Lima	PQ-2	2
3	57	Silvana De Nardin	PQ-2	1
3	57	Sofia Maria Carrato Diniz	PQ-2	1
3	57	Sylvia Regina Mesquita de Almeida	PQ-2	1
3	57	Tobias Bernward Bleninger	PQ-2	2
3	57	Valerio da Silva Almeida	PQ-2	2
3	57	Verônica Teixeira Franco Castelo Branco	PQ-2	1
3	57	Vladimir Guilherme Haach	PQ-2	2
3	57	Yuri Daniel Jatobá Costa	PQ-2	2
3	58	Adaildo Gomes D Assuncao	PQ-1A	2
3	58	Amit Bhaya	PQ-1A	2
3	58	Antonio José Alves Simões Costa	PQ-1A	2
3	58	Antonio Marcus Nogueira Lima	PQ-1A	2
3	58	Armando Martins Leite da Silva	PQ-1A	2
3	58	Carlos Emanuel de Souza	PQ-1A	2
3	58	Cursino Brandão Jacobina	PQ-1A	2
3	58	Djalma Mosqueira Falcão	PQ-1A	2
3	58	Edson Hirokazu Watanabe	PQ-1A	2
3	58	Fernando Antonio Campos Gomide	PQ-1A	2
3	58	Ivo Barbi	PQ-1A	2
3	58	Jean Pierre von der Weid	PQ-1A	2
3	58	João Bosco Ribeiro do Val	PQ-1A	2
3	58	João Pedro Assumpção Bastos	PQ-1A	2
3	58	Jose Antenor Pomilio	PQ-1A	2
3	58	José Claudio Geromel	PQ-1A	2
3	58	José Roberto Castilho Piqueira	PQ-1A	2
3	58	Liu Hsu	PQ-1A	2
3	58	Luis Antonio Aguirre	PQ-1A	2
3	58	Luiz Pereira Calôba	PQ-1A	2
3	58	Marcelo Dutra Fragoso	PQ-1A	2
3	58	Michel Daoud Yacoub	PQ-1A	2
3	58	Nelson Sadowski	PQ-1A	2
3	58	Oswaldo Luiz do Valle Costa	PQ-1A	2
3	58	Paulo Sergio Ramirez Diniz	PQ-1A	2
3	58	Pedro Luis Dias Peres	PQ-1A	2
3	58	Reginaldo Palazzo Junior	PQ-1A	2
3	58	Secundino Soares Filho	PQ-1A	2
3	58	Takashi Yoneyama	PQ-1A	2
3	58	Valdemar Cardoso da Rocha Junior	PQ-1A	2
3	58	Abraham Alcaim	PQ-1B	2
3	58	Alexandre Trofino Neto	PQ-1B	2
3	58	Antonio Carlos Zambroni de Souza	PQ-1B	2
3	58	Carlos Alberto de Castro Junior	PQ-1B	2
3	58	Eduardo Antônio Barros da Silva	PQ-1B	2
3	58	Elbert Einstein Nehrer Macau	PQ-1B	2
3	58	Elder Moreira Hemerly	PQ-1B	2
3	58	Evandro Conforti	PQ-1B	2
3	58	Fernando José Von Zuben	PQ-1B	2
3	58	Helio Waldman	PQ-1B	2
3	58	Hugo Enrique Hernandez Figueroa	PQ-1B	2
3	58	Hypolito Jose Kalinowski	PQ-1B	2
3	58	Jaime Arturo Ramírez	PQ-1B	2
3	58	Joao Antonio de Vasconcelos	PQ-1B	2
3	58	Joao Marcos Travassos Romano	PQ-1B	2
3	58	Jose Carlos Moreira Bermudez	PQ-1B	2
3	58	Jose Luiz Rezende Pereira	PQ-1B	2
3	58	Jose Manoel de Seixas	PQ-1B	2
3	58	José Renes Pinheiro	PQ-1B	2
3	58	José Roberto Cardoso	PQ-1B	2
3	58	Luiz Carlos de Freitas	PQ-1B	2
3	58	Marcus Theodor Schilling	PQ-1B	2
3	58	Mauricio Aredes	PQ-1B	2
3	58	Murilo Araujo Romero	PQ-1B	2
3	58	Newton Geraldo Bretas	PQ-1B	2
3	58	Raimundo Sampaio Neto	PQ-1B	2
3	58	Renato Cardoso Mesquita	PQ-1B	2
3	58	Rodney Rezende Saldanha	PQ-1B	2
3	58	Rubén Augusto Romero Lázaro	PQ-1B	2
3	58	Rui Seara	PQ-1B	2
3	58	Aldário Chrestani Bordonalli	PQ-1C	2
3	58	Dmitriev Victor	PQ-1C	2
3	58	Fernando José da Silva Moreira	PQ-1C	2
3	58	Hélio Leães Hey	PQ-1C	2
3	58	Joao Batista Vieira Junior	PQ-1C	2
3	58	Joao Crisóstomo Weyl Albuquerque Costa	PQ-1C	2
3	58	João Manoel Gomes da Silva Junior	PQ-1C	2
3	58	Joaquim Ferreira Martins Filho	PQ-1C	2
3	58	Joaquim José Barroso de Castro	PQ-1C	2
3	58	José Ricardo Bergmann	PQ-1C	2
3	58	Jose Wanderley Marangon Lima	PQ-1C	2
3	58	Julio Cesar Stacchini de Souza	PQ-1C	2
3	58	Julio Elias Normey-Rico	PQ-1C	2
3	58	Luís Fernando Costa Alberto	PQ-1C	2
3	58	Marcelo Carvalho Minhoto Teixeira	PQ-1C	2
3	58	Milton Brown Do Coutto Filho	PQ-1C	2
3	58	Patrick Kuo-Peng	PQ-1C	2
3	58	Reinaldo Martinez Palhares	PQ-1C	2
3	58	Ricardo Hiroshi Caldeira Takahashi	PQ-1C	2
3	58	Sergio Lima Netto	PQ-1C	2
3	58	Silverio Visacro Filho	PQ-1C	2
3	58	Sueli Irene Rodrigues Costa	PQ-1C	1
3	58	Valdeir José Farias	PQ-1C	2
3	58	Vilma Alves de Oliveira	PQ-1C	1
3	58	Adrião Duarte Dória Neto	PQ-1D	2
3	58	Alexandre Cláudio Botazzo Delbem	PQ-1D	2
3	58	Antonio Carlos Oliveira Bruno	PQ-1D	2
3	58	Antonio Luiz Pereira de Siqueira Campos	PQ-1D	2
3	58	Antonio Padilha Feltrin	PQ-1D	2
3	58	Bartolomeu Ferreira Uchoa-Filho	PQ-1D	2
3	58	Ben Hur Viana Borges	PQ-1D	2
3	58	Carlos Alberto Canesin	PQ-1D	2
3	58	Carmen Lucia Tancredo Borges	PQ-1D	1
3	58	Cecilio José Lins Pimentel	PQ-1D	1
3	58	Cláudio Costa Motta	PQ-1D	2
3	58	Daniel Ferreira Coutinho	PQ-1D	2
3	58	Denis Vinicius Coury	PQ-1D	2
3	58	Edimar José de Oliveira	PQ-1D	2
3	58	Edison Roberto Cabral da Silva	PQ-1D	2
3	58	Eduardo Fontoura Costa	PQ-1D	2
3	58	Eduardo Mazoni Andrade Marçal Mendes	PQ-1D	2
3	58	Elson José da Silva	PQ-1D	2
3	58	Francisco de Assis dos Santos Neves	PQ-1D	2
3	58	Glauco Nery Taranto	PQ-1D	2
3	58	Hilton Abílio Gründling	PQ-1D	2
3	58	Humberto Pinheiro	PQ-1D	2
3	58	Ivan Nunes da Silva	PQ-1D	2
3	58	João Carlos dos Santos Basilio	PQ-1D	2
3	58	Joao Cesar Moura Mota	PQ-1D	2
3	58	José Luís Fabris	PQ-1D	2
3	58	José Roberto Sanches Mantovani	PQ-1D	2
3	58	José Sérgio da Rocha Neto	PQ-1D	2
3	58	Lee Luan Ling	PQ-1D	2
3	58	Leonardo Antônio Borges Tôrres	PQ-1D	2
3	58	Luciane Neves Canha	PQ-1D	1
3	58	Luiz Alencar Reis da Silva Mello	PQ-1D	2
3	58	Luiz Antônio da Fonseca Manso	PQ-1D	2
3	58	Luiz Carlos Pereira da Silva	PQ-1D	2
3	58	Luiz Wagner Pereira Biscainho	PQ-1D	2
3	58	Marcelo Eduardo Pellenz	PQ-1D	2
3	58	Marcelo Eduardo Vieira Segatto	PQ-1D	2
3	58	Marcelo Luís Francisco Abbade	PQ-1D	2
3	58	Marcelo Martins Werneck	PQ-1D	2
3	58	Marcelo Sampaio de Alencar	PQ-1D	2
3	58	Marcos Julio Rider Flores	PQ-1D	2
3	58	Maurício Beltrão de Rossiter Corrêa	PQ-1D	2
3	58	Osvaldo Ronald Saavedra Mendez	PQ-1D	2
3	58	Paulo Sergio Pereira da Silva	PQ-1D	2
3	58	Ramon Romankevicius Costa	PQ-1D	2
3	58	Ricardo Bernardo Prada	PQ-1D	2
3	58	Ricardo Nederson do Prado	PQ-1D	2
3	58	Richard Demo Souza	PQ-1D	2
3	58	Roberto de Alencar Lotufo	PQ-1D	2
3	58	Roberto Kawakami Harrop Galvão	PQ-1D	2
3	58	Rodrigo Andrade Ramos	PQ-1D	2
3	58	Rubens de Andrade Junior	PQ-1D	2
3	58	Rubens Viana Ramos	PQ-1D	2
3	58	Vitor Heloiz Nascimento	PQ-1D	2
3	58	Walmir de Freitas Filho	PQ-1D	2
3	58	Adriano Chaves Lisboa	PQ-2	2
3	58	Alberto Resende De Conti	PQ-2	2
3	58	Aldayr Dantas de Araújo	PQ-2	2
3	58	Aldebaro Barreto da Rocha Klautau Júnior	PQ-2	2
3	58	Aleksander Sade Paterno	PQ-2	2
3	58	Alessandro do Nascimento Vargas	PQ-2	2
3	58	Alessandro Jacoud Peixoto	PQ-2	2
3	58	Alexandre Street de Aguiar	PQ-2	2
3	58	Alfeu Joãozinho Sguarezi Filho	PQ-2	2
3	58	Alfredo Carlos Peterlevitz	PQ-2	2
3	58	Álysson Raniere Seidel	PQ-2	2
3	58	Alzenira da Rosa Abaide	PQ-2	1
3	58	Amílcar Careli César	PQ-2	2
3	58	André Lima Férrer de Almeida	PQ-2	2
3	58	André Luís Marques Marcato	PQ-2	2
3	58	Andrés Pablo López Barbero	PQ-2	2
3	58	Antonio Carlos Ferreira	PQ-2	2
3	58	Antonio Carlos Siqueira de Lima	PQ-2	2
3	58	Arismar Cerqueira Sodré Junior	PQ-2	2
3	58	Arnaldo Jose Perin	PQ-2	2
3	58	Augusto Santiago Cerqueira	PQ-2	2
3	58	Benedito Isaias de Lima Lopes	PQ-2	2
3	58	Brigida Ramati Pereira da Rocha	PQ-2	1
3	58	Bruno Otávio Soares Teixeira	PQ-2	2
3	58	Carlos Alexandre Rolim Fernandes	PQ-2	2
3	58	Carlos Andrey Maia	PQ-2	2
3	58	Carlos Augusto Duque	PQ-2	2
3	58	Carlos Renato Lisboa Francês	PQ-2	2
3	58	Carlos Roberto Hall Barbosa	PQ-2	2
3	58	Carmelo Jose Albanez Bastos Filho	PQ-2	2
3	58	Cassiano Rech	PQ-2	2
3	58	Cassio Goncalves do Rego	PQ-2	2
3	58	Cássio Guimarães Lopes	PQ-2	2
3	58	Charles Casimiro Cavalcante	PQ-2	2
3	58	Claudio Garcia	PQ-2	2
3	58	Cláudio Kitano	PQ-2	2
3	58	Clodoaldo Aparecido de Moraes Lima	PQ-2	2
3	58	Cristiano de Mello Gallep	PQ-2	2
3	58	Daniel Benevides da Costa	PQ-2	2
3	58	Danton Diego Ferreira	PQ-2	2
3	58	Darli Augusto de Arruda Mello	PQ-2	2
3	58	Demercil de Souza Oliveira Júnior	PQ-2	2
3	58	Denizar Cruz Martins	PQ-2	2
3	58	Dilson Amancio Alves	PQ-2	2
3	58	Douglas Alexandre Gomes Vieira	PQ-2	2
3	58	Edson da Costa Bortoni	PQ-2	2
3	58	Eduardo Gontijo Carrano	PQ-2	2
3	58	Eduardo Nobuhiro Asada	PQ-2	2
3	58	Eduardo Nunes Gonçalves	PQ-2	2
3	58	Erlon Cristian Finardi	PQ-2	2
3	58	Ernane Antônio Alves Coelho	PQ-2	2
3	58	Felix Alberto Farret	PQ-2	2
3	58	Fernando Cesar Lizarralde	PQ-2	2
3	58	Fernando de Oliveira Souza	PQ-2	2
3	58	Fernando Lessa Tofoli	PQ-2	2
3	58	Fernando Luiz Marcelo Antunes	PQ-2	2
3	58	Flávio Henrique Teles Vieira	PQ-2	2
3	58	Francisco Marcos de Assis	PQ-2	2
3	58	Frederico Gadelha Guimarães	PQ-2	2
3	58	Ghendy Cardoso Junior	PQ-2	2
3	58	Guilherme de Alencar Barreto	PQ-2	2
3	58	Guilherme Penello Temporão	PQ-2	2
3	58	Gustavo Fraidenraich	PQ-2	2
3	58	Hani Camille Yehia	PQ-2	2
3	58	Henrique Mohallem Paiva	PQ-2	2
3	58	Iguatemi Eduardo da Fonseca	PQ-2	2
3	58	Isaac Soares de Freitas	PQ-2	2
3	58	Ivo Chaves da Silva Junior	PQ-2	2
3	58	Jean Carlos Cardozo da Silva	PQ-2	2
3	58	Jean Vianei Leite	PQ-2	2
3	58	João Alberto Passos Filho	PQ-2	2
3	58	Joao Bosco Augusto London Junior	PQ-2	2
3	58	João Luiz Rebelatto	PQ-2	2
3	58	Joao Paulo Carvalho Lustosa da Costa	PQ-2	2
3	58	Jorge Diego Marconi	PQ-2	2
3	58	José Antonio Apolinário Junior	PQ-2	2
3	58	José Cândido Silveira Santos Filho	PQ-2	2
3	58	Jose Carlos de Melo Vieira Junior	PQ-2	2
3	58	Jose Jaime da Cruz	PQ-2	2
3	58	Jozue Vieira Filho	PQ-2	2
3	58	Juliano Bandeira Lima	PQ-2	2
3	58	Leandro dos Santos Coelho	PQ-2	2
3	58	Leandro Ramos de Araujo	PQ-2	2
3	58	Leonardo Tomazeli Duarte	PQ-2	2
3	58	Leonidas Chaves de Resende	PQ-2	2
3	58	Lisandro Lovisolo	PQ-2	2
3	58	Luiz Carlos Gomes de Freitas	PQ-2	2
3	58	Luiz Cera Zanetta Junior	PQ-2	2
3	58	Luiz Henrique Bonani do Nascimento	PQ-2	2
3	58	Luiz Henrique Silva Colado Barreto	PQ-2	2
3	58	Luiz Lebensztajn	PQ-2	2
3	58	Madson Cortes de Almeida	PQ-2	2
3	58	Magno Teófilo Madeira da Silva	PQ-2	2
3	58	Marcello Luiz Rodrigues de Campos	PQ-2	2
3	58	Marcelo Cabral Cavalcanti	PQ-2	2
3	58	Marcelo Lobo Heldwein	PQ-2	2
3	58	Marcio Eisencraft	PQ-2	2
3	58	Márcio Holsbach Costa	PQ-2	2
3	58	Marco Antônio Dalla Costa	PQ-2	2
3	58	Marcos Antonio Ruggieri Franco	PQ-2	2
3	58	Marcos Tavares de Melo	PQ-2	2
3	58	Marcos Vicente de Brito Moreira	PQ-2	2
3	58	Maria Cristina Dias Tavares	PQ-2	1
3	58	Maria José Pontes	PQ-2	1
3	58	Maria Thereza Miranda Rocco Giraldi	PQ-2	1
3	58	Mariane Rembold Petraglia	PQ-2	1
3	58	Mário Lúcio da Silva Martins	PQ-2	2
3	58	Mário Oleskovicz	PQ-2	2
3	58	Mauricio Barbosa de Camargo Salles	PQ-2	2
3	58	Maurício Henrique Costa Dias	PQ-2	2
3	58	Mauricio Valencia Ferreira da Luz	PQ-2	2
3	58	Mauro Augusto da Rosa	PQ-2	2
3	58	Michel Zamboni Rached	PQ-2	2
3	58	Moisés Renato Nunes Ribeiro	PQ-2	2
3	58	Moises Vidal Ribeiro	PQ-2	2
3	58	Nelson Jhoe Batistela	PQ-2	2
3	58	Odilon Maroja da Costa Pereira Filho	PQ-2	2
3	58	Paulo Cardieri	PQ-2	2
3	58	Paulo César Pellanda	PQ-2	2
3	58	Paulo Henrique da Fonseca Silva	PQ-2	2
3	58	Paulo Márcio da Silveira	PQ-2	2
3	58	Rausley Adriano Amaral de Souza	PQ-2	2
3	58	Renato da Rocha Lopes	PQ-2	2
3	58	Renato José de Sobral Cintra	PQ-2	2
3	58	Ricardo Coração de Leão Fontoura de Oliveira	PQ-2	2
3	58	Ricardo Suyama	PQ-2	2
3	58	Ricardo Tokio Higuti	PQ-2	2
3	58	Ricardo Vasques de Oliveira	PQ-2	2
3	58	Roberto Chouhy Leborgne	PQ-2	2
3	58	Rodrigo Caiado de Lamare	PQ-2	2
3	58	Rodrigo Cardim	PQ-2	2
3	58	Romis Ribeiro de Faissol Attux	PQ-2	2
3	58	Rosângela Fernandes Coelho	PQ-2	1
3	58	Sandro Gonçalves da Silva	PQ-2	2
3	58	Sérgio Kurokawa	PQ-2	2
3	58	Silvio Ikuyo Nabeta	PQ-2	2
3	58	Taufik Abrão	PQ-2	2
3	58	Thelma Solange Piazza Fernandes	PQ-2	1
3	58	Valter Júnior de Souza Leite	PQ-2	2
3	58	Vinícius Foletto Montagner	PQ-2	2
3	58	Wallace do Couto Boaventura	PQ-2	2
3	58	Wesley Pacheco Calixto	PQ-2	2
3	58	Xisto Lucas Travassos Junior	PQ-2	2
3	59	Bluma Guenther Soares (Eng. de Materiais)	PQ-1A	1
3	59	Cecilia Amelia de Carvalho Zavaglia	PQ-1A	1
3	59	Rosario Elida Suman Bretas	PQ-1A	1
3	59	Aloisio Nelmo Klein	PQ-1A	2
3	59	Amauri Garcia	PQ-1A	2
3	59	Angelo Fernando Padilha	PQ-1A	2
3	59	Carlos Kenichi Suzuki	PQ-1A	2
3	59	Carlos Pérez Bergmann	PQ-1A	2
3	59	Celso Valentim Santilli	PQ-1A	2
3	59	Claudio Shyinti Kiminami	PQ-1A	2
3	59	Claudio Shyinti Kiminami	PQ-1A	2
3	59	Edgar Dutra Zanotto	PQ-1A	2
3	59	Edson Roberto Leite	PQ-1A	2
3	59	Elson Longo da Silva	PQ-1A	2
3	59	Fernando Cosme Rizzo Assuncao	PQ-1A	2
3	59	Joao Marcos Alcoforado Rebello	PQ-1A	2
3	59	Jorge Alberto Soares Tenório	PQ-1A	2
3	59	Jose Antonio Eiras	PQ-1A	2
3	59	Jose Arana Varela	PQ-1A	2
3	59	Lirio Schaeffer	PQ-1A	2
3	59	Luiz Henrique Capparelli Mattoso	PQ-1A	2
3	59	Oscar Rosa Mattos	PQ-1A	2
3	59	Paulo Rangel Rios	PQ-1A	2
3	59	Paulo Roberto Cetlin	PQ-1A	2
3	59	Reginaldo Muccillo	PQ-1A	2
3	59	Sergio Neves Monteiro	PQ-1A	2
3	59	Victor Carlos Pandolfelli	PQ-1A	2
3	59	Walter Jose Botta Filho	PQ-1A	2
3	59	Wander Luiz Vasconcelos	PQ-1A	2
3	59	Cristina Tristão de Andrade	PQ-1B	1
3	59	Dulce Maria de Araújo Melo	PQ-1B	1
3	59	Dulcina Maria Pinatti Ferreira de Souza	PQ-1B	1
3	59	Elisabete Frollini	PQ-1B	1
3	59	Gloria Dulce de Almeida Soares	PQ-1B	1
3	59	Maria Aparecida Zaghete Bertochi	PQ-1B	1
3	59	Maria Ines Bruno Tavares	PQ-1B	1
3	59	Regina Celia Reis Nunes	PQ-1B	1
3	59	Ruth Herta Goldschmidt Aliaga Kiminami	PQ-1B	1
3	59	Achilles Junqueira Bourdot Dutra	PQ-1B	2
3	59	Amilton Sinatora	PQ-1B	2
3	59	Andre Paulo Tschiptschin	PQ-1B	2
3	59	Antonio Carlos Guastaldi	PQ-1B	2
3	59	Antônio Cezar Faria Vilela	PQ-1B	2
3	59	Antonio Pedro Novaes de Oliveira	PQ-1B	2
3	59	Carlos Mauricio Lepienski	PQ-1B	2
3	59	Carlos Nelson Elias	PQ-1B	2
3	59	Claudemiro Bolfarini	PQ-1B	2
3	59	Dagoberto Brandão Santos	PQ-1B	2
3	59	Edvani Curti Muniz	PQ-1B	2
3	59	Evaldo Jose Corat	PQ-1B	2
3	59	Helio Goldenstein	PQ-1B	2
3	59	Herman Sander Mansur	PQ-1B	2
3	59	Humberto Gracher Riella	PQ-1B	2
3	59	José Carlos Bressiani	PQ-1B	2
3	59	Jose de Anchieta Rodrigues	PQ-1B	2
3	59	Luiz Antonio Pessan	PQ-1B	2
3	59	Luiz Henrique de Almeida	PQ-1B	2
3	59	Márcio Raymundo Morelli	PQ-1B	2
3	59	Mario Cilense	PQ-1B	2
3	59	Rubens Caram Junior	PQ-1B	2
3	59	Sergio Alvaro de Souza Camargo Junior	PQ-1B	2
3	59	Telmo Roberto Strohaecker	PQ-1B	2
3	59	Uilame Umbelino Gomes	PQ-1B	2
3	59	Wilson Acchar	PQ-1B	2
3	59	Ana Helena de Almeida Bressiani	PQ-1C	1
3	59	Eliana Navarro dos Santos Muccillo	PQ-1C	1
3	59	Iêda Maria Garcia dos Santos	PQ-1C	1
3	59	Isolda Costa	PQ-1C	1
3	59	Laura Hecker de Carvalho	PQ-1C	1
3	59	Leila Lea Yuan Visconte	PQ-1C	1
3	59	Maria Madalena de Camargo Forte	PQ-1C	1
3	59	Aldo Eloizo Job	PQ-1C	2
3	59	Alvaro Antonio Alencar de Queiroz	PQ-1C	2
3	59	Carlos Angelo Nunes	PQ-1C	2
3	59	Carlos Arthur Ferreira	PQ-1C	2
3	59	Cosme Roberto Moreira da Silva	PQ-1C	2
3	59	Dachamir Hotza	PQ-1C	2
3	59	Eduardo de Albuquerque Brocchi	PQ-1C	2
3	59	Fernando Jose Gomes Landgraf	PQ-1C	2
3	59	Jose Roberto Moraes d'Almeida	PQ-1C	2
3	59	Marcos Lopes Dias	PQ-1C	2
3	59	Rodrigo Lambert Oréfice	PQ-1C	2
3	59	Ronaldo Sergio de Biasi	PQ-1C	2
3	59	Sebastiao Vicente Canevarolo Junior	PQ-1C	2
3	59	Sérgio Souto Maior Tavares	PQ-1C	2
3	59	Vicente Tadeu Lopes Buono	PQ-1C	2
3	59	Vladimir Jesus Trava-Airoldi	PQ-1C	2
3	59	Ana Cristina Figueiredo de Melo Costa	PQ-1D	1
3	59	Ana Sofia Clímaco Monteiro de Oliveira	PQ-1D	1
3	59	Andrea Moura Bernardes	PQ-1D	1
3	59	Berenice Mendonca Gonzalez	PQ-1D	1
3	59	Célia de Fraga Malfatti	PQ-1D	1
3	59	Denise Schermann Azambuja	PQ-1D	1
3	59	Ducinei Garcia	PQ-1D	1
3	59	Edcleide Maria Araújo	PQ-1D	1
3	59	Jane Zoppas Ferreira	PQ-1D	1
3	59	Luciana Reyes Pires Kassab	PQ-1D	1
3	59	Neidenêi Gomes Ferreira	PQ-1D	1
3	59	Sonia Denise Ferreira Rocha	PQ-1D	1
3	59	Wang Shu Hui	PQ-1D	1
3	59	Ademir José Zattera	PQ-1D	2
3	59	Ailton de Souza Gomes	PQ-1D	2
3	59	Antonio Eduardo Martinelli	PQ-1D	2
3	59	Antonio José Felix de Carvalho	PQ-1D	2
3	59	Carlos Alberto Paskocimas	PQ-1D	2
3	59	Carlos Maurício Fontes Vieira	PQ-1D	2
3	59	Carlos Roberto Grandini	PQ-1D	2
3	59	Cauê Ribeiro de Oliveira	PQ-1D	2
3	59	Claudinei dos Santos	PQ-1D	2
3	59	Cyro Takano	PQ-1D	2
3	59	Dilson Silva dos Santos	PQ-1D	2
3	59	Douglas Gouvêa	PQ-1D	2
3	59	Eudes Borges de Araújo	PQ-1D	2
3	59	Frank Patrick Missell	PQ-1D	2
3	59	Gelmires de Araujo Neves	PQ-1D	2
3	59	Helio de Lucena Lira	PQ-1D	2
3	59	Hugo Ricardo Zschommler Sandim	PQ-1D	2
3	59	Joao Marcos Madurro	PQ-1D	2
3	59	José Adilson de Castro	PQ-1D	2
3	59	Jose Antonio da Cunha Ponciano Gomes	PQ-1D	2
3	59	Luis Claudio Mendes	PQ-1D	2
3	59	Luís Frederico Pinheiro Dick	PQ-1D	2
3	59	Luiz Carlos Casteletti	PQ-1D	2
3	59	Marcello Filgueira	PQ-1D	2
3	59	Marcelo Borges Mansur	PQ-1D	2
3	59	Marcelo Linardi	PQ-1D	2
3	59	Marcelo Silveira Rabello	PQ-1D	2
3	59	Paulo José Modenesi	PQ-1D	2
3	59	Paulo Roberto Bueno	PQ-1D	2
3	59	Pedro Augusto de Paula Nascente	PQ-1D	2
3	59	Roberto Ribeiro de Avillez	PQ-1D	2
3	59	Rubén Jesus Sánchez Rodríguez	PQ-1D	2
3	59	Sandro Campos Amico	PQ-1D	2
3	59	Sebastião Elias Kuri	PQ-1D	2
3	59	Versiane Albis Leão	PQ-1D	2
3	59	Waldek Wladimir Bose Filho	PQ-1D	2
3	59	Ana Claudia Queiroz Ladeira	PQ-2	1
3	59	Ana Maria Maliska	PQ-2	1
3	59	Ana Maria Spohr	PQ-2	1
3	59	Ana Paula de Azevedo Marques	PQ-2	1
3	59	Ana Paula Testa Pezzin	PQ-2	1
3	59	Anne Michelle Garrido Pedrosa de Souza	PQ-2	1
3	59	Carla Patricia Lacerda Rubinger	PQ-2	1
3	59	Cláudia Eliana Bruno Marino	PQ-2	1
3	59	Claudia Regina Elias Mansur	PQ-2	1
3	59	Cristina Bormio Nunes	PQ-2	1
3	59	Daniela Becker	PQ-2	1
3	59	Dolores Ribeiro Ricci Lazar	PQ-2	1
3	59	Edesia Martins Barros de Sousa	PQ-2	1
3	59	Eliria Maria de Jesus Agnolon Pallone	PQ-2	1
3	59	Elizabeth Roditi Lachter	PQ-2	1
3	59	Emilia Satoshi Miyamaru Seo	PQ-2	1
3	59	Fabiana Villela da Motta	PQ-2	1
3	59	Fernanda Roberta Marciano	PQ-2	1
3	59	Geralda Cristina Durães de Godoy	PQ-2	1
3	59	Glaura Goulart Silva	PQ-2	1
3	59	Glória Maria Vinhas	PQ-2	1
3	59	Ingrid Tavora Weber	PQ-2	1
3	59	Isabel Cristina Pereira Margarit-Mattos	PQ-2	1
3	59	Ivana Lourenço de Mello Ferreira	PQ-2	1
3	59	Ivone Regina de Oliveira	PQ-2	1
3	59	Janaina da Silva Crespo	PQ-2	1
3	59	Janete Eunice Zorzi	PQ-2	1
3	59	Laura Oliveira Péres Philadelphi	PQ-2	1
3	59	Lauralice de Campos Franceschini Canale	PQ-2	1
3	59	Ledjane Silva Barreto	PQ-2	1
3	59	Lilian Ferreira de Senna	PQ-2	1
3	59	Lilian Pantoja Sosman	PQ-2	1
3	59	Liliana Amaral Féris	PQ-2	1
3	59	Lisiane Navarro de Lima Santana	PQ-2	1
3	59	Mara Zeni Andrade	PQ-2	1
3	59	Marcia Cristina Branciforti	PQ-2	1
3	59	Maria Aparecida Godoy Soler Pajanian	PQ-2	1
3	59	Maria de Fátima Vieira Marques	PQ-2	1
3	59	Maria José Araújo Sales	PQ-2	1
3	59	Maria José Ramos Sandim	PQ-2	1
3	59	Maria Rita de Morais Chaves Santos	PQ-2	1
3	59	Maria Teresa Paulino Aguilar	PQ-2	1
3	59	Mariana Gava Segatelli	PQ-2	1
3	59	Marivalda de Magalhaes Pereira	PQ-2	1
3	59	Paula Mendes Jardim	PQ-2	1
3	59	Renata Antoun Simao	PQ-2	1
3	59	Renata Barbosa	PQ-2	1
3	59	Rosana Zacarias Domingues	PQ-2	1
3	59	Rossana Mara da Silva Moreira Thiré	PQ-2	1
3	59	Ruth Marlene Campomanes Santana	PQ-2	1
3	59	Sônia Faria Zawadzki	PQ-2	1
3	59	Suédina Maria de Lima Silva	PQ-2	1
3	59	Suzana Nóbrega de Medeiros	PQ-2	1
3	59	Yeda Medeiros Bastos de Almeida	PQ-2	1
3	59	Zélia Soares Macedo	PQ-2	1
3	59	Adilson Luiz Chinelatto	PQ-2	2
3	59	Adriano Michael Bernardin	PQ-2	2
3	59	Alain Laurent Marie Robin	PQ-2	2
3	59	Alberto Adriano Cavalheiro	PQ-2	2
3	59	Alberto Moreira Jorge Junior	PQ-2	2
3	59	Alcides Lopes Leao	PQ-2	2
3	59	Alexandre da Silva Rocha	PQ-2	2
3	59	Alexandre José de Castro Lanfredi	PQ-2	2
3	59	Alexandre Queiroz Bracarense	PQ-2	2
3	59	Alexandre Zirpoli Simões	PQ-2	2
3	59	Alexys Bruno Alfonso	PQ-2	2
3	59	Alfeu Saraiva Ramos	PQ-2	2
3	59	Aluísio Alves Cabral Júnior	PQ-2	2
3	59	Anderson de Oliveira Lobo	PQ-2	2
3	59	André Luiz Pinto	PQ-2	2
3	59	Andrés Vercik	PQ-2	2
3	59	Anselmo Ortega Boschi	PQ-2	2
3	59	Antonio Augusto Couto	PQ-2	2
3	59	Antonio Jefferson da Silva Machado	PQ-2	2
3	59	Antonio Tallarico Vicente Adorno	PQ-2	2
3	59	Bojan Marinkovic	PQ-2	2
3	59	Carlos Alberto Alves Cairo	PQ-2	2
3	59	Carlos Alejandro Figueroa	PQ-2	2
3	59	Carlos Alexandre dos Santos	PQ-2	2
3	59	Carlos Antonio da Silva	PQ-2	2
3	59	Carlos Antônio de Morais	PQ-2	2
3	59	Carlos Augusto Silva de Oliveira	PQ-2	2
3	59	Carlos Renato Rambo	PQ-2	2
3	59	Carlos Triveño Rios	PQ-2	2
3	59	Claudio Geraldo Schon	PQ-2	2
3	59	Cleiton Carvalho Silva	PQ-2	2
3	59	Conrado Ramos Moreira Afonso	PQ-2	2
3	59	Daniel Souza Corrêa	PQ-2	2
3	59	Dario Antonio Donatti	PQ-2	2
3	59	Devaney Ribeiro do Carmo	PQ-2	2
3	59	Dimas Roberto Vollet	PQ-2	2
3	59	Durval Rodrigues Junior	PQ-2	2
3	59	Ednan Joanni	PQ-2	2
3	59	Edson Cavalcanti da Silva Filho	PQ-2	2
3	59	Edson Noriyuki Ito	PQ-2	2
3	59	Elineudo Pinho de Moura	PQ-2	2
3	59	Eliton Souto de Medeiros	PQ-2	2
3	59	Elson de Campos	PQ-2	2
3	59	Enori Gemelli	PQ-2	2
3	59	Fabio Coral Fonseca	PQ-2	2
3	59	Fauze Ahmad Aouada	PQ-2	2
3	59	Fenelon Martinho Lima Pontes	PQ-2	2
3	59	Filiberto González Garcia	PQ-2	2
3	59	Francisco Carlos Serbena	PQ-2	2
3	59	Francisco José Moura	PQ-2	2
3	59	Francisco Moura Filho	PQ-2	2
3	59	Francisco Rolando Valenzuela Diaz	PQ-2	2
3	59	Gilberto Carvalho Coelho	PQ-2	2
3	59	Gilmar Patrocínio Thim	PQ-2	2
3	59	Guilhermino José Macêdo Fechine	PQ-2	2
3	59	Gustavo Henrique Denzin Tonoli	PQ-2	2
3	59	Hamilton Ferreira Gomes de Abreu	PQ-2	2
3	59	Haroldo Cavalcanti Pinto	PQ-2	2
3	59	Helio Wiebeck	PQ-2	2
3	59	Hercílio Gomes de Melo	PQ-2	2
3	59	Hidetoshi Takiishi	PQ-2	2
3	59	Hugo Marcelo Veit	PQ-2	2
3	59	Humberto Naoyuki Yoshimura	PQ-2	2
3	59	Ivan Napoleão Bastos	PQ-2	2
3	59	Jefferson Fabrício Cardoso Lins	PQ-2	2
3	59	Jesualdo Luiz Rossi	PQ-2	2
3	59	Joao Carlos Silos Moraes	PQ-2	2
3	59	Jose Antonio Malmonge	PQ-2	2
3	59	José de los Santos Guerra	PQ-2	2
3	59	José Eduardo Spinelli	PQ-2	2
3	59	Jose Manoel Marconcini	PQ-2	2
3	59	Jose Milton Elias de Matos	PQ-2	2
3	59	Jose Nilson França de Holanda	PQ-2	2
3	59	Juan Manuel Pardal	PQ-2	2
3	59	Julio Carlos Afonso	PQ-2	2
3	59	Julio Ricardo Sambrano	PQ-2	2
3	59	Keizo Yukimitu	PQ-2	2
3	59	Konstantin Georgiev Kostov	PQ-2	2
3	59	Kurt Strecker	PQ-2	2
3	59	Laécio Santos Cavalcante	PQ-2	2
3	59	Lalgudi Venkataraman Ramanathan	PQ-2	2
3	59	Leandro Martins	PQ-2	2
3	59	Leinig Antonio Perazolli	PQ-2	2
3	59	Leonardo Bresciani Canto	PQ-2	2
3	59	Luciano Pessanha Moreira	PQ-2	2
3	59	Luís Augusto Sousa Marques da Rocha	PQ-2	2
3	59	Luis Vicente de Andrade Scalvi	PQ-2	2
3	59	Luiz Antonio Ferreira Coelho	PQ-2	2
3	59	Luiz Claudio de Santa-Maria	PQ-2	2
3	59	Luiz Claudio Pardini	PQ-2	2
3	59	Luiz Edmundo Bastos Soledade	PQ-2	2
3	59	Luiz Henrique da Silva Gasparotto	PQ-2	2
3	59	Manoel Ribeiro da Silva	PQ-2	2
3	59	Manuel Henrique Lente	PQ-2	2
3	59	Marcal Jose Rodrigues Pires	PQ-2	2
3	59	Marcelo Breda Mourão	PQ-2	2
3	59	Marcelo de Aquino Martorano	PQ-2	2
3	59	Marcelo Falcão de Oliveira	PQ-2	2
3	59	Marcelo Henrique Prado da Silva	PQ-2	2
3	59	Marcelo José Barros de Souza	PQ-2	2
3	59	Marcelo Ornaghi Orlandi	PQ-2	2
3	59	Marcio Celso Fredel	PQ-2	2
3	59	Marcio Luis Ferreira Nascimento	PQ-2	2
3	59	Marco Antônio Siqueira Rodrigues	PQ-2	2
3	59	Marcos Antonio da Silva Costa	PQ-2	2
3	59	Marcos Flavio de Campos	PQ-2	2
3	59	Marcos Marques da Silva Paula	PQ-2	2
3	59	Marcos Tadeu Dazeredo Orlando	PQ-2	2
3	59	Marcos Valério Ribeiro	PQ-2	2
3	59	Marcus Vinicius Lia Fook	PQ-2	2
3	59	Mário Lúcio Moreira	PQ-2	2
3	59	Mário Sérgio da Luz	PQ-2	2
3	59	Maurício Ribeiro Baldan	PQ-2	2
3	59	Miguel Ángel Ramírez Gil	PQ-2	2
3	59	Miguel Justino Ribeiro Barboza	PQ-2	2
3	59	Nelson Batista de Lima	PQ-2	2
3	59	Nelson Guedes de Alcântara	PQ-2	2
3	59	Nelson Heriberto Almeida Camargo	PQ-2	2
3	59	Paulo Antonio Pereira Wendhausen	PQ-2	2
3	59	Paulo Henrique de Oliveira Rappl	PQ-2	2
3	59	Rafael Salomão	PQ-2	2
3	59	Renato Altobelli Antunes	PQ-2	2
3	59	Rero Marques Rubinger	PQ-2	2
3	59	Ricardo Alexandre Galdino da Silva	PQ-2	2
3	59	Ricardo Artur Sanguinetti Ferreira	PQ-2	2
3	59	Rodinei Medeiros Gomes	PQ-2	2
3	59	Rodrigo Magnabosco	PQ-2	2
3	59	Rogério Pinto Mota	PQ-2	2
3	59	Romualdo Rodrigues Menezes	PQ-2	2
3	59	Rômulo Ríbeiro Magalhães de Sousa	PQ-2	2
3	59	Saulo Roca Bragança	PQ-2	2
3	59	Sebastião Ribeiro	PQ-2	2
3	59	Sergio Duarte Brandi	PQ-2	2
3	59	Sérgio Henrique Pezzin	PQ-2	2
3	59	Severino Leopoldino Urtiga Filho	PQ-2	2
3	59	Sivaldo Leite Correia	PQ-2	2
3	59	Tomás Jeferson Alves de Mélo	PQ-2	2
3	59	Tomaz Toshimi Ishikawa	PQ-2	2
3	59	Tulio Matencio	PQ-2	2
3	59	Victor Hugo Costa de Albuquerque	PQ-2	2
3	59	Victor Hugo Vitorino Sarmento	PQ-2	2
3	59	Vinicius André Rodrigues Henriques	PQ-2	2
3	59	Vitor Luiz Sordi	PQ-2	2
3	60	Silvia Azucena Nebra de Pérez (ENG MEC)	PQ-1A	1
3	60	Abimael Fernando Dourado Loula	PQ-1A	2
3	60	Álisson Rocha Machado	PQ-1A	2
3	60	Alvaro Toubes Prata	PQ-1A	2
3	60	Américo Scotti	PQ-1A	2
3	60	Anselmo Eduardo Diniz	PQ-1A	2
3	60	Antônio José da Silva Neto	PQ-1A	2
3	60	Atila Pantaleao Silva Freire	PQ-1A	2
3	60	Claudio Ruggieri	PQ-1A	2
3	60	Edgar Nobuo Mamiya	PQ-1A	2
3	60	Emílio Carlos Nelli Silva	PQ-1A	2
3	60	Fernando Alves Rochinha	PQ-1A	2
3	60	Francisco Ricardo da Cunha	PQ-1A	2
3	60	Helcio Rangel Barreto Orlande	PQ-1A	2
3	60	Joao Andrade de Carvalho Junior	PQ-1A	2
3	60	João Fernando Gomes de Oliveira	PQ-1A	2
3	60	José Luz Silveira	PQ-1A	2
3	60	José Manoel Balthazar	PQ-1A	2
3	60	Jose Roberto de Franca Arruda	PQ-1A	2
3	60	Jose Viriato Coelho Vargas	PQ-1A	2
3	60	Kamal Abdel Radi Ismail	PQ-1A	2
3	60	Luiz Bevilacqua	PQ-1A	2
3	60	Marcelo Amorim Savi	PQ-1A	2
3	60	Marcelo Jose Santos de-Lemos	PQ-1A	2
3	60	Marcio Arab Murad	PQ-1A	2
3	60	Marcio da Silveira Carvalho	PQ-1A	2
3	60	Paulo Cesar Philippi	PQ-1A	2
3	60	Paulo Roberto de Souza Mendes	PQ-1A	2
3	60	Raul Antonino Feijóo	PQ-1A	2
3	60	Renato Machado Cotta	PQ-1A	2
3	60	Rodnei Bertazzoli	PQ-1A	2
3	60	Rubens Sampaio Filho	PQ-1A	2
3	60	Samir Nagi Yousri Gerges	PQ-1A	2
3	60	Sergio Colle	PQ-1A	2
3	60	Valder Steffen Junior	PQ-1A	2
3	60	Maria Helena Robert	PQ-1B	1
3	60	Alexandre Mendes Abrao	PQ-1B	2
3	60	Antonio Ferreira Ávila	PQ-1B	2
3	60	Antonio Gilson Barbosa de Lima	PQ-1B	2
3	60	Cláudio Melo	PQ-1B	2
3	60	Clovis Raimundo Maliska	PQ-1B	2
3	60	Clovis Sperb de Barcellos	PQ-1B	2
3	60	Denis José Schiozer	PQ-1B	2
3	60	Domingos Alves Rade	PQ-1B	2
3	60	Eduardo Carlos Bianchi	PQ-1B	2
3	60	Electo Eduardo Silva Lora	PQ-1B	2
3	60	Gustavo Carlos Buscaglia	PQ-1B	2
3	60	Hans Ingo Weber	PQ-1B	2
3	60	Heraldo Silva da Costa Mattos	PQ-1B	2
3	60	Jader Riso Barbosa Junior	PQ-1B	2
3	60	Jose Daniel Biasoli de Mello	PQ-1B	2
3	60	Linilson Rodrigues Padovese	PQ-1B	2
3	60	Luiz Alberto Oliveira Rocha	PQ-1B	2
3	60	Marcos Pinotti Barbosa	PQ-1B	2
3	60	Michael John Brennan	PQ-1B	2
3	60	Nathan Mendes	PQ-1B	2
3	60	Paulo Henrique Trombetta Zannin	PQ-1B	2
3	60	Roberto Martins de Souza	PQ-1B	2
3	60	Su Jian	PQ-1B	2
3	60	Katia Lucchesi Cavalca Dedini	PQ-1C	1
3	60	Viviana Cocco Mariani	PQ-1C	1
3	60	Antonio André Novotny	PQ-1C	2
3	60	Antonio Castelo Filho	PQ-1C	2
3	60	Carlos Henrique Ahrens	PQ-1C	2
3	60	Gean Vitor Salmoria	PQ-1C	2
3	60	Gherhardt Ribatski	PQ-1C	2
3	60	Helio José Corrêa Barbosa	PQ-1C	2
3	60	João Marciano Laredo dos Reis	PQ-1C	2
3	60	João Nazareno Nonato Quaresma	PQ-1C	2
3	60	Luis Fernando Alzuguir Azevedo	PQ-1C	2
3	60	Marcelo José Colaço	PQ-1C	2
3	60	Marco Antonio Meggiolaro	PQ-1C	2
3	60	Paulo Roberto Mei	PQ-1C	2
3	60	Reginaldo Teixeira Coelho	PQ-1C	2
3	60	Walter Lindolfo Weingaertner	PQ-1C	2
3	60	Ana Lúcia Diegues Skury	PQ-1D	1
3	60	Maria Laura Martins Costa	PQ-1D	1
3	60	Monica Feijo Naccache	PQ-1D	1
3	60	Arcanjo Lenzi	PQ-1D	2
3	60	Armando Albertazzi Gonçalves Júnior	PQ-1D	2
3	60	Carlos José de Araújo	PQ-1D	2
3	60	Daniel Onofre de Almeida Cruz	PQ-1D	2
3	60	Edson Bazzo	PQ-1D	2
3	60	Eduardo Alberto Fancello	PQ-1D	2
3	60	Eduardo Aoun Tannuri	PQ-1D	2
3	60	Emanuel Negrão Macêdo	PQ-1D	2
3	60	Eugenio Jose Zoqui	PQ-1D	2
3	60	Francis Henrique Ramos França	PQ-1D	2
3	60	Gilmar Guimaraes	PQ-1D	2
3	60	Guilherme Mariz de Oliveira Barra	PQ-1D	2
3	60	Henrique Rozenfeld	PQ-1D	2
3	60	Ivaldo Leao Ferreira	PQ-1D	2
3	60	Jair Carlos Dutra	PQ-1D	2
3	60	João Carlos Espíndola Ferreira	PQ-1D	2
3	60	Joao Roberto Ferreira	PQ-1D	2
3	60	José Ricardo Sodré	PQ-1D	2
3	60	Juan Carlos Campos Rubio	PQ-1D	2
3	60	Julio César Passos	PQ-1D	2
3	60	Luiz Nelio Henderson Guedes de Oliveira	PQ-1D	2
3	60	Marcelo Areias Trindade	PQ-1D	2
3	60	Marcílio Alves	PQ-1D	2
3	60	Marcio Bacci da Silva	PQ-1D	2
3	60	Miguel Vaz Júnior	PQ-1D	2
3	60	Noé Cheung	PQ-1D	2
3	60	Norberto Mangiavacchi	PQ-1D	2
3	60	Paulo César Soares Júnior	PQ-1D	2
3	60	Paulo Roberto de Aguiar	PQ-1D	2
3	60	Paulo Roberto Maciel Lyra	PQ-1D	2
3	60	Pedro Manuel Calas Lopes Pacheco	PQ-1D	2
3	60	Raul Gonzalez Lima	PQ-1D	2
3	60	Renato Goulart Jasinevicius	PQ-1D	2
3	60	Roberto Aizik Tenenbaum	PQ-1D	2
3	60	Rodrigo Perito Cardoso	PQ-1D	2
3	60	Rogério Martins Saldanha da Gama	PQ-1D	2
3	60	Roney Leon Thompson	PQ-1D	2
3	60	Rubens Maribondo do Nascimento	PQ-1D	2
3	60	Sergio Viçosa Möller	PQ-1D	2
3	60	Silvio de Oliveira Junior	PQ-1D	2
3	60	Vicente Lopes Junior	PQ-1D	2
3	60	Ana Paula Rosifini Alves Claro	PQ-2	1
3	60	Angela Ourivio Nieckele	PQ-2	1
3	60	Aura Conci	PQ-2	1
3	60	Carolina Palma Naveira Cotta	PQ-2	1
3	60	Daniela Buske	PQ-2	1
3	60	Doina Mariana Banea	PQ-2	1
3	60	Eve Maria Freire de Aquino	PQ-2	1
3	60	Flávia Schwarz Franceschini Zinani	PQ-2	1
3	60	Henara Lillian Costa Murray	PQ-2	1
3	60	Izabel Fernanda Machado	PQ-2	1
3	60	Jacqueline Biancon Copetti	PQ-2	1
3	60	Jane Meri Santos	PQ-2	1
3	60	Juliana Braga Rodrigues Loureiro	PQ-2	1
3	60	Maria da Penha Cindra Fonseca	PQ-2	1
3	60	Mirian de Lourdes Noronha Motta Melo	PQ-2	1
3	60	Paula Cristina Garcia Manoel Crnkovic	PQ-2	1
3	60	Regina Célia Cerqueira de Almeida	PQ-2	1
3	60	Alessandro Roger Rodrigues	PQ-2	2
3	60	Alexandre Kupka da Silva	PQ-2	2
3	60	Alexandre Mikowski	PQ-2	2
3	60	Álvaro Luiz de Bortoli	PQ-2	2
3	60	Anatoli Leontiev	PQ-2	2
3	60	André Ricardo Fioravanti	PQ-2	2
3	60	Andrey Ricardo da Silva	PQ-2	2
3	60	Angelo Marcelo Tusset	PQ-2	2
3	60	Antonio Almeida Silva	PQ-2	2
3	60	Antônio Marcos Gonçalves de Lima	PQ-2	2
3	60	Ariosto Bretanha Jorge	PQ-2	2
3	60	Armando de Azevedo Caldeira Pires	PQ-2	2
3	60	Bento Rodrigues de Pontes Junior	PQ-2	2
3	60	Bruno Souza Carmo	PQ-2	2
3	60	Carlos Alberto Bavastri	PQ-2	2
3	60	Carlos Eduardo Leme Nóbrega	PQ-2	2
3	60	Carlos Frajuca	PQ-2	2
3	60	Carlos Henrique Marchi	PQ-2	2
3	60	Cesar Jose Deschamps	PQ-2	2
3	60	Cesar Renato Foschini	PQ-2	2
3	60	Cezar Otaviano Ribeiro Negrão	PQ-2	2
3	60	Cherlio Scandian	PQ-2	2
3	60	Christian Johann Losso Hermes	PQ-2	2
3	60	Claudio Roberto Ávila da Silva Júnior	PQ-2	2
3	60	Cleber Santiago Alves	PQ-2	2
3	60	Cleudmar Amaral de Araújo	PQ-2	2
3	60	Daniel Martins	PQ-2	2
3	60	Douglas Bressan Riffel	PQ-2	2
3	60	Edmilson Otoni Corrêa	PQ-2	2
3	60	Edson Antonio Capello Sousa	PQ-2	2
3	60	Edson José Soares	PQ-2	2
3	60	Edson Luiz Cataldo Ferreira	PQ-2	2
3	60	Eduardo Gomes Dutra do Carmo	PQ-2	2
3	60	Elizaldo Domingues dos Santos	PQ-2	2
3	60	Enio Pedone Bandarra Filho	PQ-2	2
3	60	Eraldo Jannone da Silva	PQ-2	2
3	60	Erick de Moraes Franklin	PQ-2	2
3	60	Fabiano Gilberto Wolf	PQ-2	2
3	60	Fábio Roberto Chavarette	PQ-2	2
3	60	Fabrício Simeoni de Sousa	PQ-2	2
3	60	Fernando Pereira Duda	PQ-2	2
3	60	Flávio Buiochi	PQ-2	2
3	60	Francisco Antônio Belo	PQ-2	2
3	60	Francisco Duarte Moura Neto	PQ-2	2
3	60	Francisco Marcondes	PQ-2	2
3	60	Francisco Nivaldo Aguiar Freire	PQ-2	2
3	60	Fred Lacerda Amorim	PQ-2	2
3	60	Gerson Henrique dos Santos	PQ-2	2
3	60	Gilbert Silva	PQ-2	2
3	60	Gustavo Mendes Platt	PQ-2	2
3	60	Helio Aparecido Navarro	PQ-2	2
3	60	Helio Pedro Amaral Souto	PQ-2	2
3	60	Herbert Martins Gomes	PQ-2	2
3	60	Horácio Antonio Vielmo	PQ-2	2
3	60	Ignacio Iturrioz	PQ-2	2
3	60	Ivan Fabio Mota de Menezes	PQ-2	2
3	60	Jaime Gilberto Duduch	PQ-2	2
3	60	Jánes Landre Júnior	PQ-2	2
3	60	Jeferson Avila Souza	PQ-2	2
3	60	Jefferson de Oliveira Gomes	PQ-2	2
3	60	Jesús Salvador Pérez Guerrero	PQ-2	2
3	60	Jiang Zhu	PQ-2	2
3	60	João Batista Fogagnolo	PQ-2	2
3	60	Joaquim Eugênio Abel Seabra	PQ-2	2
3	60	Jorge Hugo Silvestrini	PQ-2	2
3	60	Jorge Recarte Henriquez Guerrero	PQ-2	2
3	60	Jose Alberto dos Reis Parise	PQ-2	2
3	60	José Divo Bressan	PQ-2	2
3	60	Jose Mauricio Alves de Matos Gurgel	PQ-2	2
3	60	Jose Roberto Simoes Moreira	PQ-2	2
3	60	Juan Francisco Camino	PQ-2	2
3	60	Jun Sérgio Ono Fonseca	PQ-2	2
3	60	Juno Gallego	PQ-2	2
3	60	Jurandir Itizo Yanagihara	PQ-2	2
3	60	Leandro Alcoforado Sphaier	PQ-2	2
3	60	Leandro Franco de Souza	PQ-2	2
3	60	Leonardo Roberto da Silva	PQ-2	2
3	60	Leonardo Santos de Brito Alves	PQ-2	2
3	60	Leôncio Diógenes Tavares Câmara	PQ-2	2
3	60	Leopoldo Pisanelli Rodrigues de Oliveira	PQ-2	2
3	60	Lincoln Cardoso Brandão	PQ-2	2
3	60	Louriel Oliveira Vilarinho	PQ-2	2
3	60	Luben Cabezas Gómez	PQ-2	2
3	60	Luciano Luporini Menegaldo	PQ-2	2
3	60	Luis Orlando Emerich dos Santos	PQ-2	2
3	60	Luiz Carlos da Silva Nunes	PQ-2	2
3	60	Maicon Ribeiro Correa	PQ-2	2
3	60	Manuel Ernani de Carvalho Cruz	PQ-2	2
3	60	Marcelo dos Santos Pereira	PQ-2	2
3	60	Marcelo Ferreira Motta	PQ-2	2
3	60	Márcio Mafra	PQ-2	2
3	60	Marco Antônio Luersen	PQ-2	2
3	60	Marco Lucio Bittencourt	PQ-2	2
3	60	Marcos Akira d'Ávila	PQ-2	2
3	60	Mario Benjamim Baptista de Siqueira	PQ-2	2
3	60	Matias Roberto Viotti	PQ-2	2
3	60	Moisés Alves Marcelino Neto	PQ-2	2
3	60	Neyval Costa Reis Junior	PQ-2	2
3	60	Nilson Barbieri	PQ-2	2
3	60	Oscar Mauricio Hernandez Rodriguez	PQ-2	2
3	60	Osvaldo José Venturini	PQ-2	2
3	60	Otávio Fernandes Lima da Rocha	PQ-2	2
3	60	Pablo Javier Blanco	PQ-2	2
3	60	Paulo Augusto Berquo de Sampaio	PQ-2	2
3	60	Paulo César Borges	PQ-2	2
3	60	Paulo de Tarso Rocha de Mendonça	PQ-2	2
3	60	Paulo Eustaquio de Faria	PQ-2	2
3	60	Paulo Roberto Gardel Kurka	PQ-2	2
3	60	Paulo Sergio Berving Zdanski	PQ-2	2
3	60	Paulo Smith Schneider	PQ-2	2
3	60	Paulo Victor Prestes Marcondes	PQ-2	2
3	60	Renato Barbieri	PQ-2	2
3	60	Renato Nascimento Elias	PQ-2	2
3	60	Ricardo Belchior Tôrres	PQ-2	2
3	60	Ricardo Diego Torres	PQ-2	2
3	60	Ricardo Nicolau Nassar Koury	PQ-2	2
3	60	Roberto Guimarães Pereira	PQ-2	2
3	60	Rodrigo Nicoletti	PQ-2	2
3	60	Rodrigo Rossi	PQ-2	2
3	60	Róger Ribeiro Riehl	PQ-2	2
3	60	Rogério Gomes de Oliveira	PQ-2	2
3	60	Rogério José Marczak	PQ-2	2
3	60	Ronaldo Pinheiro da Rocha Paranhos	PQ-2	2
3	60	Rosemar Batista da Silva	PQ-2	2
3	60	Rubem Mário Figueiró Vargas	PQ-2	2
3	60	Samuel da Silva	PQ-2	2
3	60	Sandro Metrevelle Marcondes de Lima e Silva	PQ-2	2
3	60	Sergio de Queiroz Bogado Leite	PQ-2	2
3	60	Sergio Leal Braga	PQ-2	2
3	60	Sergio Tonini Button	PQ-2	2
3	60	Silvio Francisco Brunatto	PQ-2	2
3	60	Silvio Romero de Barros	PQ-2	2
3	60	Solidônio Rodrigues de Carvalho	PQ-2	2
3	60	Sydney Ferreira Santos	PQ-2	2
3	60	Thiago Gamboa Ritto	PQ-2	2
3	60	Valtair Antonio Ferraresi	PQ-2	2
3	60	Vitoriano Ruas de Barros Santos	PQ-2	2
3	60	Wendell de Queiróz Lamas	PQ-2	2
3	60	Wislei Riuper Ramos Osorio	PQ-2	2
3	60	Yogendra Prasad Yadava	PQ-2	2
3	61	Virginia Sampaio Teixeira Ciminelli (Emg. Minas)	PQ-1A	1
3	61	Antonio Eduardo Clark Peres	PQ-1A	2
3	61	Carlos Hoffmann Sampaio	PQ-1A	2
3	61	Jorge Rubio	PQ-1A	2
3	61	Paulo Roberto Gomes Brandao	PQ-1A	2
3	61	Joao Felipe Coimbra Leite Costa	PQ-1B	2
3	61	Mauricio Leonardo Torem	PQ-1B	2
3	61	Geraldo Magela da Costa	PQ-1D	2
3	61	Henrique Kahn	PQ-1D	2
3	61	Luis Marcelo Marques Tavares	PQ-1D	2
3	61	Sidnei Paciornik	PQ-1D	2
3	61	Cristiane Oliveira Rodrigues	PQ-2	1
3	61	Marisa Bezerra de Mello Monte	PQ-2	1
3	61	Rosa Malena Fernandes Lima	PQ-2	1
3	61	Adilson Curi	PQ-2	2
3	61	Carlos Alberto Pereira	PQ-2	2
3	61	Carlos Otavio Petter	PQ-2	2
3	61	George Eduardo Sales Valadão	PQ-2	2
3	61	Giorgio Francesco Cesare de Tomi	PQ-2	2
3	61	Hernani Mota de Lima	PQ-2	2
3	61	Irineu Antônio Schadach de Brum	PQ-2	2
3	61	Ivo André Homrich Schneider	PQ-2	2
3	61	José Aurélio Medeiros da Luz	PQ-2	2
3	61	Luis Felipe Silva Oliveira	PQ-2	2
3	61	Rafael Teixeira Rodrigues	PQ-2	2
3	62	Julio Romano Meneghini	PQ-1B	2
3	62	Segen Farid Estefen	PQ-1B	2
3	62	Celso Pupo Pesce	PQ-1C	2
3	62	Murilo Augusto Vaz	PQ-1D	2
3	62	Theodoro Antoun Netto	PQ-1D	2
3	62	Marysilvia Ferreira da Costa	PQ-2	1
3	62	Alexandre Nicolaos Simos	PQ-2	2
3	62	André Luís Condino Fujarra	PQ-2	2
3	62	Gustavo Roque da Silva Assi	PQ-2	2
3	62	Juan Bautista Villa Wanderley	PQ-2	2
3	62	Marcelo de Almeida Santos Neves	PQ-2	2
3	63	Elisabete A De Nadai Fernandes	PQ-1A	1
3	63	Helen Jamil Khoury	PQ-1A	1
3	63	Linda Viola Ehlin Caldas	PQ-1A	1
3	63	Marco Túllio Menna Barreto de Vilhena	PQ-1A	2
3	63	Ricardo Tadeu Lopes	PQ-1A	2
3	63	Ademir Xavier da Silva	PQ-1B	2
3	63	Divanizia do Nascimento Souza	PQ-1B	1
3	63	Leticia Lucente Campos Rodrigues	PQ-1B	1
3	63	Mitiko Saiki	PQ-1B	1
3	63	Antonio Carlos Marques Alvim	PQ-1B	2
3	63	Fernando Carvalho da Silva	PQ-1B	2
3	63	Jose Marcus de Oliveira Godoy	PQ-1B	2
3	63	Roberto Schirru	PQ-1B	2
3	63	Tarcisio Passos Ribeiro de Campos	PQ-1B	2
3	63	Barbara Paci Mazzilli	PQ-1C	1
3	63	Claubia Pereira Bezerra Lima	PQ-1C	1
3	63	Adimir dos Santos	PQ-1C	2
3	63	Artur Wilson Carbonari	PQ-1C	2
3	63	Carlos Eduardo Veloso de Almeida	PQ-1C	2
3	63	Carlos Roberto Appoloni	PQ-1C	2
3	63	Fernando Roberto de Andrade Lima	PQ-1C	2
3	63	Joaquim Teixeira de Assis	PQ-1C	2
3	63	Jorge Eduardo de Souza Sarkis	PQ-1C	2
3	63	Jose Albertino Bendassolli	PQ-1C	2
3	63	Nilson Costa Roberty	PQ-1C	2
3	63	Paulo Fernando Ferreira Frutuoso e Melo	PQ-1C	2
3	63	Rajendra Narain Saxena	PQ-1C	2
3	63	Ana Maria Graciano Figueiredo	PQ-1D	1
3	63	Liliane Basso Barichello	PQ-1D	1
3	63	Margarida Mizue Hamada	PQ-1D	1
3	63	Marina Beatriz Agostini Vasconcellos	PQ-1D	1
3	63	Marina Fallone Koskinas	PQ-1D	1
3	63	Celso Marcelo Franklin Lapa	PQ-1D	2
3	63	Cláudio Márcio do Nascimento Abreu Pereira	PQ-1D	2
3	63	Delson Braz	PQ-1D	2
3	63	Edgar Francisco Oliveira de Jesus	PQ-1D	2
3	63	Elmo Silvano de Araújo	PQ-1D	2
3	63	Marcelino José dos Anjos	PQ-1D	2
3	63	Mauro da Silva Dias	PQ-1D	2
3	63	Ricardo Carvalho de Barros	PQ-1D	2
3	63	Roberto David Martinez Garcia	PQ-1D	2
3	63	Antonella Lombardi Costa	PQ-2	1
3	63	Cynthia Feijo Segatto	PQ-2	1
3	63	Deborah Ines Teixeira Favaro	PQ-2	1
3	63	Ivone Mulako Sato	PQ-2	1
3	63	Márcia de Almeida Rizzutto	PQ-2	1
3	63	Maria Auxiliadora Fortini Veloso	PQ-2	1
3	63	Monica Beatriz Mathor	PQ-2	1
3	63	Nanci do Nascimento	PQ-2	1
3	63	Regina Cely Rodrigues Barroso	PQ-2	1
3	63	Silvana Moreira	PQ-2	1
3	63	Simone Coutinho Cardoso	PQ-2	1
3	63	Vera Akiko Maihara	PQ-2	1
3	63	Antônio Carlos de Abreu Mól	PQ-2	2
3	63	Bardo Ernst Josef Bodmann	PQ-2	2
3	63	Bernardo Maranhão Dantas	PQ-2	2
3	63	Carlos Alberto Brayner de Oliveira Lira	PQ-2	2
3	63	Carlos Costa Dantas	PQ-2	2
3	63	Casimiro Jaime Alfredo Sepúlveda Munita	PQ-2	2
[truncated: 2,860 more rows]
