# Supplementary material for: Underrepresentation of women in the senior levels of Brazilian science
Source: PeerJ. 2017 Dec 19;5:e4000. doi: 10.7717/peerj.4000 (PMC5741063; doi:10.7717/peerj.4000)
Supplement: Supplemental Information 5 — Raw dataset. [file peerj-05-4000-s005.xlsx]

## Sheet: Edital Universal 2014
RangeFunding	Gender	Name	Subarea	Area
60-120 thousand Brazilian reais	Female	Tamara Tania Cohen Egler	Arquitetura, Demografia, Geografia	Humanities
60-120 thousand Brazilian reais	Female	Maria Angela de Almeida Souza	Arquitetura, Demografia, Geografia	Humanities
60-120 thousand Brazilian reais	Male	Leonardo Barci Castriota	Arquitetura, Demografia, Geografia	Humanities
60-120 thousand Brazilian reais	Female	Lisandra Pereira Lamoso	Arquitetura, Demografia, Geografia	Humanities
60-120 thousand Brazilian reais	Male	Francisco de Assis Mendonca	Arquitetura, Demografia, Geografia	Humanities
60-120 thousand Brazilian reais	Male	Arivaldo Leão de Amorim	Arquitetura, Demografia, Geografia	Humanities
60-120 thousand Brazilian reais	Male	Carlos Frederico de Angelis	Arquitetura, Demografia, Geografia	Humanities
60-120 thousand Brazilian reais	Male	Fabio Jose Martins de Lima	Arquitetura, Demografia, Geografia	Humanities
60-120 thousand Brazilian reais	Female	Patricia Campos Borja	Arquitetura, Demografia, Geografia	Humanities
60-120 thousand Brazilian reais	Male	Antonio Carlos de Barros Correa	Arquitetura, Demografia, Geografia	Humanities
60-120 thousand Brazilian reais	Female	Nilda Guimarães Alves	Educação	Humanities
60-120 thousand Brazilian reais	Female	Ana Maria Saul	Educação	Humanities
60-120 thousand Brazilian reais	Female	Olgaíses Cabral Maués	Educação	Humanities
60-120 thousand Brazilian reais	Female	Sonia Kramer	Educação	Humanities
60-120 thousand Brazilian reais	Male	Wagner Rodrigues Valente	Educação	Humanities
60-120 thousand Brazilian reais	Male	Wagner Bandeira Andriola	Educação	Humanities
60-120 thousand Brazilian reais	Female	Rosária da Silva Justi	Educação	Humanities
60-120 thousand Brazilian reais	Male	Eduardo Adolfo Terrazzan	Educação	Humanities
60-120 thousand Brazilian reais	Female	Silvia Nogueira Chaves	Educação	Humanities
60-120 thousand Brazilian reais	Male	Christiano Lyra Filho	Engenharia de Produção e de Transportes	Exact Sciences
60-120 thousand Brazilian reais	Male	Jose Augusto Abreu Sa Fortes	Engenharia de Produção e de Transportes	Exact Sciences
60-120 thousand Brazilian reais	Male	Jose Lívio Gomide	Recursos Florestais	Exact Sciences
60-120 thousand Brazilian reais	Male	Joaquim dos Santos	Recursos Florestais	Exact Sciences
60-120 thousand Brazilian reais	Male	Cassio Hamilton Abreu Junior	Recursos Florestais	Exact Sciences
60-120 thousand Brazilian reais	Male	Jorge Luiz Colodette	Recursos Florestais	Exact Sciences
60-120 thousand Brazilian reais	Male	Roberto Avelino Cecílio	Recursos Florestais	Exact Sciences
60-120 thousand Brazilian reais	Female	Fernanda Amato Gaiotto	Recursos Florestais	Exact Sciences
60-120 thousand Brazilian reais	Male	Steel Silva Vasconcelos	Recursos Florestais	Exact Sciences
60-120 thousand Brazilian reais	Female	Francisca Dionízia de Almeida Matos	Recursos Florestais	Exact Sciences
60-120 thousand Brazilian reais	Male	Marco Aurelio Watanabe Lentini	Recursos Florestais	Exact Sciences
60-120 thousand Brazilian reais	Male	Tadário Kamel de Oliveira	Recursos Florestais	Exact Sciences
60-120 thousand Brazilian reais	Male	Miguel Luiz Menezes Freitas	Recursos Florestais	Exact Sciences
60-120 thousand Brazilian reais	Female	Marisa de Cassia Piccolo	Recursos Florestais	Exact Sciences
60-120 thousand Brazilian reais	Male	Wilter Ricardo Russiano Vicente	Medicina Veterinária	Life Sciences
60-120 thousand Brazilian reais	Female	Maria Angelica Miglino	Medicina Veterinária	Life Sciences
60-120 thousand Brazilian reais	Male	Claudio Severo Lombardo de Barros	Medicina Veterinária	Life Sciences
60-120 thousand Brazilian reais	Male	Ciro Alexandre Alves Torres	Medicina Veterinária	Life Sciences
60-120 thousand Brazilian reais	Female	Jane Megid	Medicina Veterinária	Life Sciences
60-120 thousand Brazilian reais	Female	Solange Maria Gennari	Medicina Veterinária	Life Sciences
60-120 thousand Brazilian reais	Male	Paulo Bayard Dias Goncalves	Medicina Veterinária	Life Sciences
60-120 thousand Brazilian reais	Female	Ana Maria Reis Ferreira	Medicina Veterinária	Life Sciences
60-120 thousand Brazilian reais	Female	Zelia Ines Portela Lobato	Medicina Veterinária	Life Sciences
60-120 thousand Brazilian reais	Male	Guilherme de Paula Nogueira	Medicina Veterinária	Life Sciences
60-120 thousand Brazilian reais	Male	Amauri Alcindo Alfieri	Medicina Veterinária	Life Sciences
60-120 thousand Brazilian reais	Male	Helder Louvandini	Medicina Veterinária	Life Sciences
60-120 thousand Brazilian reais	Male	Carlos Tadeu Pippi Salle	Medicina Veterinária	Life Sciences
60-120 thousand Brazilian reais	Female	Ana Liz Garcia Alves	Medicina Veterinária	Life Sciences
60-120 thousand Brazilian reais	Male	Luis Fernando Pita Gondim	Medicina Veterinária	Life Sciences
60-120 thousand Brazilian reais	Male	Deiler Sampaio Costa	Medicina Veterinária	Life Sciences
60-120 thousand Brazilian reais	Male	Odir Antonio Dellagostin	Medicina Veterinária	Life Sciences
60-120 thousand Brazilian reais	Male	Celso José Bruno de Oliveira	Medicina Veterinária	Life Sciences
60-120 thousand Brazilian reais	Female	Maria Lucia Zaidan Dagli	Medicina Veterinária	Life Sciences
60-120 thousand Brazilian reais	Male	Helio Langoni	Medicina Veterinária	Life Sciences
60-120 thousand Brazilian reais	Male	Andrey Pereira Lage	Medicina Veterinária	Life Sciences
60-120 thousand Brazilian reais	Female	Márcia Rogéria de Almeida Lamëgo	Medicina Veterinária	Life Sciences
60-120 thousand Brazilian reais	Female	Maria Madalena Pessoa Guerra	Medicina Veterinária	Life Sciences
60-120 thousand Brazilian reais	Male	Aristeu Vieira da Silva	Medicina Veterinária	Life Sciences
60-120 thousand Brazilian reais	Male	Vicente José de Figueirêdo Freitas	Medicina Veterinária	Life Sciences
60-120 thousand Brazilian reais	Male	Paulo Eugenio Alves Macedo de Oliveira	Botânica	Life Sciences
60-120 thousand Brazilian reais	Male	Fabio Murilo DaMatta	Botânica	Life Sciences
60-120 thousand Brazilian reais	Female	Mutue Toyota Fujii	Botânica	Life Sciences
60-120 thousand Brazilian reais	Female	Ana Maria Giulietti Harley	Botânica	Life Sciences
60-120 thousand Brazilian reais	Male	Alexandre Salino	Botânica	Life Sciences
60-120 thousand Brazilian reais	Male	Augusto Cesar Franco	Botânica	Life Sciences
60-120 thousand Brazilian reais	Male	Martinho de Almeida e Silva	Zootecnia	Life Sciences
60-120 thousand Brazilian reais	Male	Dante Pazzanese Duarte Lanna	Zootecnia	Life Sciences
60-120 thousand Brazilian reais	Male	Luiz Lehmann Coutinho	Zootecnia	Life Sciences
60-120 thousand Brazilian reais	Female	Telma Teresinha Berchielli	Zootecnia	Life Sciences
60-120 thousand Brazilian reais	Male	José Neuman Miranda Neiva	Zootecnia	Life Sciences
60-120 thousand Brazilian reais	Male	Rilke Tadeu Fonseca de Freitas	Zootecnia	Life Sciences
60-120 thousand Brazilian reais	Female	Vivian Fischer	Zootecnia	Life Sciences
60-120 thousand Brazilian reais	Male	Fernando Flores Cardoso	Zootecnia	Life Sciences
60-120 thousand Brazilian reais	Male	Severino Gonzaga Neto	Zootecnia	Life Sciences
60-120 thousand Brazilian reais	Male	Fernando Guilherme Perazzo Costa	Zootecnia	Life Sciences
60-120 thousand Brazilian reais	Female	Luciana Castro Geraseev	Zootecnia	Life Sciences
60-120 thousand Brazilian reais	Female	Izabelle Auxiliadora Molina de Almeida Teixeira	Zootecnia	Life Sciences
60-120 thousand Brazilian reais	Female	Maria Teresa Moreira Osório	Zootecnia	Life Sciences
60-120 thousand Brazilian reais	Male	Flávio Augusto Portela Santos	Zootecnia	Life Sciences
60-120 thousand Brazilian reais	Male	Marcos Veiga dos Santos	Zootecnia	Life Sciences
60-120 thousand Brazilian reais	Male	Marcelo de Andrade Ferreira	Zootecnia	Life Sciences
60-120 thousand Brazilian reais	Male	Odilon Gomes Pereira	Zootecnia	Life Sciences
60-120 thousand Brazilian reais	Female	Luciana Correia de Almeida Regitano	Zootecnia	Life Sciences
60-120 thousand Brazilian reais	Female	Simone Eliza Facioni Guimaraes	Zootecnia	Life Sciences
60-120 thousand Brazilian reais	Female	Concepta Margaret McManus Pimentel	Zootecnia	Life Sciences
60-120 thousand Brazilian reais	Male	Paulo César de Faccio Carvalho	Zootecnia	Life Sciences
60-120 thousand Brazilian reais	Male	Ivanor Nunes do Prado	Zootecnia	Life Sciences
60-120 thousand Brazilian reais	Male	Sebastiao de Campos Valadares Filho	Zootecnia	Life Sciences
60-120 thousand Brazilian reais	Male	Luiz Carlos Ruiz Pessenda	Geociências	Exact Sciences
60-120 thousand Brazilian reais	Male	Jean Michel Lafon	Geociências	Exact Sciences
60-120 thousand Brazilian reais	Male	Alcides Nóbrega Sial	Geociências	Exact Sciences
60-120 thousand Brazilian reais	Male	Leo Afraneo Hartmann	Geociências	Exact Sciences
60-120 thousand Brazilian reais	Female	Valderez Pinto Ferreira	Geociências	Exact Sciences
60-120 thousand Brazilian reais	Male	Nivaor Rodolfo Rigozo	Geociências	Exact Sciences
60-120 thousand Brazilian reais	Male	Rodrigo Bezerra de Araujo Gallis	Geociências	Exact Sciences
60-120 thousand Brazilian reais	Male	Enner Herenio de Alcântara	Geociências	Exact Sciences
60-120 thousand Brazilian reais	Male	Francisco Hilario Rego Bezerra	Geociências	Exact Sciences
60-120 thousand Brazilian reais	Male	Danilo Marcondes de Souza Filho	Filosofia	Humanities
60-120 thousand Brazilian reais	Male	Alfredo Carlos Storck	Filosofia	Humanities
60-120 thousand Brazilian reais	Female	Magda Diniz Bezerra Dimenstein	Psicologia e Serviço Social	Humanities
60-120 thousand Brazilian reais	Female	Deise Mancebo	Psicologia e Serviço Social	Humanities
60-120 thousand Brazilian reais	Female	Maria Lúcia Teixeira Garcia	Psicologia e Serviço Social	Humanities
60-120 thousand Brazilian reais	Female	Ana Regina Noto Faria	Psicologia e Serviço Social	Humanities
60-120 thousand Brazilian reais	Male	Sebastiao de Sousa Almeida	Psicologia e Serviço Social	Humanities
60-120 thousand Brazilian reais	Female	Marcia Martins Marques	Odontologia	Life Sciences
60-120 thousand Brazilian reais	Male	Adriano Mota Loyola	Odontologia	Life Sciences
60-120 thousand Brazilian reais	Female	Roseana de Almeida Freitas	Odontologia	Life Sciences
60-120 thousand Brazilian reais	Male	Fausto Medeiros Mendes	Odontologia	Life Sciences
60-120 thousand Brazilian reais	Male	Fernando de Oliveira Costa	Odontologia	Life Sciences
60-120 thousand Brazilian reais	Male	Carlos Eduardo Vergani	Odontologia	Life Sciences
60-120 thousand Brazilian reais	Male	Daniel Saito	Odontologia	Life Sciences
60-120 thousand Brazilian reais	Male	Márcio Zaffalon Casati	Odontologia	Life Sciences
60-120 thousand Brazilian reais	Female	Rosemary Sadami Arai Shinkai	Odontologia	Life Sciences
60-120 thousand Brazilian reais	Male	Antonio Luiz Barbosa Pinheiro	Odontologia	Life Sciences
60-120 thousand Brazilian reais	Male	Jose Mauro Granjeiro	Odontologia	Life Sciences
60-120 thousand Brazilian reais	Male	Marcus Raimundo Vale	Divulgação Científica	Humanities
60-120 thousand Brazilian reais	Male	Roberto Lent	Morfologia	Life Sciences
60-120 thousand Brazilian reais	Male	Vivaldo Moura Neto	Morfologia	Life Sciences
60-120 thousand Brazilian reais	Female	Maria Alice da Cruz Hofling	Morfologia	Life Sciences
60-120 thousand Brazilian reais	Male	Jose Garcia Ribeiro Abreu Junior	Morfologia	Life Sciences
60-120 thousand Brazilian reais	Male	Luiz Renato de Franca	Morfologia	Life Sciences
60-120 thousand Brazilian reais	Female	Sônia Nair Báo	Morfologia	Life Sciences
60-120 thousand Brazilian reais	Male	Geraldo Wilson Afonso Fernandes	Ecologia e Limnologia	Life Sciences
60-120 thousand Brazilian reais	Male	Valerio De Patta Pillar	Ecologia e Limnologia	Life Sciences
60-120 thousand Brazilian reais	Male	Bruce Rider Forsberg	Ecologia e Limnologia	Life Sciences
60-120 thousand Brazilian reais	Male	Jansen Alfredo Sampaio Zuanon	Ecologia e Limnologia	Life Sciences
60-120 thousand Brazilian reais	Male	Afonso Celso Dias Bainy	Ecologia e Limnologia	Life Sciences
60-120 thousand Brazilian reais	Male	Luiz Felipe Machado Velho	Ecologia e Limnologia	Life Sciences
60-120 thousand Brazilian reais	Female	Marina Anciaes	Ecologia e Limnologia	Life Sciences
60-120 thousand Brazilian reais	Male	Philippe Olivier Alexandre Navaux	Ciências da Computação	Exact Sciences
60-120 thousand Brazilian reais	Male	Nelson Maculan Filho	Ciências da Computação	Exact Sciences
60-120 thousand Brazilian reais	Male	Augusto Cezar Alves Sampaio	Ciências da Computação	Exact Sciences
60-120 thousand Brazilian reais	Male	Carlos Eduardo Ferreira	Ciências da Computação	Exact Sciences
60-120 thousand Brazilian reais	Male	Jose Neuman de Souza	Ciências da Computação	Exact Sciences
60-120 thousand Brazilian reais	Male	Jose Marcos Silva Nogueira	Ciências da Computação	Exact Sciences
60-120 thousand Brazilian reais	Male	Marcos Aurélio Batista	Ciências da Computação	Exact Sciences
60-120 thousand Brazilian reais	Male	Guido Costa Souza de Araújo	Ciências da Computação	Exact Sciences
60-120 thousand Brazilian reais	Male	Carlos Eduardo Pereira	Ciências da Computação	Exact Sciences
60-120 thousand Brazilian reais	Male	Marcelo Ferreira Siqueira	Ciências da Computação	Exact Sciences
60-120 thousand Brazilian reais	Female	Aline Villavicencio	Ciências da Computação	Exact Sciences
60-120 thousand Brazilian reais	Male	Luiz Marcos Garcia Goncalves	Ciências da Computação	Exact Sciences
60-120 thousand Brazilian reais	Female	Carla Maria Dal Sasso Freitas	Ciências da Computação	Exact Sciences
60-120 thousand Brazilian reais	Male	Tiago Garcia de Senna Carneiro	Ciências da Computação	Exact Sciences
60-120 thousand Brazilian reais	Male	Cid Carvalho de Souza	Ciências da Computação	Exact Sciences
60-120 thousand Brazilian reais	Male	Pedro Leite da Silva Dias	Ciências da Computação	Exact Sciences
60-120 thousand Brazilian reais	Male	André Carlos Ponce de Leon Ferreira de Carvalho	Ciências da Computação	Exact Sciences
60-120 thousand Brazilian reais	Male	Eduardo Batalha Viveiros de Castro	Antrop., Arqueol., C. Política, Direito, Rel. Internacionais e Sociologia	Humanities
60-120 thousand Brazilian reais	Male	Leonardo Avritzer	Antrop., Arqueol., C. Política, Direito, Rel. Internacionais e Sociologia	Humanities
60-120 thousand Brazilian reais	Male	Cesar Barreira	Antrop., Arqueol., C. Política, Direito, Rel. Internacionais e Sociologia	Humanities
60-120 thousand Brazilian reais	Female	Lucila Scavone	Antrop., Arqueol., C. Política, Direito, Rel. Internacionais e Sociologia	Humanities
60-120 thousand Brazilian reais	Male	Antonio David Cattani	Antrop., Arqueol., C. Política, Direito, Rel. Internacionais e Sociologia	Humanities
60-120 thousand Brazilian reais	Female	Alcida Rita Ramos	Antrop., Arqueol., C. Política, Direito, Rel. Internacionais e Sociologia	Humanities
60-120 thousand Brazilian reais	Male	Luis Felipe Miguel	Antrop., Arqueol., C. Política, Direito, Rel. Internacionais e Sociologia	Humanities
60-120 thousand Brazilian reais	Female	Maria Celi Ramos da Cruz Scalon	Antrop., Arqueol., C. Política, Direito, Rel. Internacionais e Sociologia	Humanities
60-120 thousand Brazilian reais	Female	Denise Pahl Schaan	Antrop., Arqueol., C. Política, Direito, Rel. Internacionais e Sociologia	Humanities
60-120 thousand Brazilian reais	Female	Lília Maia de Morais Sales	Antrop., Arqueol., C. Política, Direito, Rel. Internacionais e Sociologia	Humanities
60-120 thousand Brazilian reais	Male	José Heder Benatti	Antrop., Arqueol., C. Política, Direito, Rel. Internacionais e Sociologia	Humanities
60-120 thousand Brazilian reais	Male	André Luís Callegari	Antrop., Arqueol., C. Política, Direito, Rel. Internacionais e Sociologia	Humanities
60-120 thousand Brazilian reais	Male	Patryck de Araujo Ayala	Antrop., Arqueol., C. Política, Direito, Rel. Internacionais e Sociologia	Humanities
60-120 thousand Brazilian reais	Male	Marco Aurélio Chaves Cepik	Antrop., Arqueol., C. Política, Direito, Rel. Internacionais e Sociologia	Humanities
60-120 thousand Brazilian reais	Female	Lucia Martins Teixeira	Microbiologia e Parasitologia	Life Sciences
60-120 thousand Brazilian reais	Male	Antonio Raimundo Lima Cruz Teixeira	Microbiologia e Parasitologia	Life Sciences
60-120 thousand Brazilian reais	Male	Celio Lopes Silva	Microbiologia e Parasitologia	Life Sciences
60-120 thousand Brazilian reais	Female	Agnes Marie Sa Figueiredo	Microbiologia e Parasitologia	Life Sciences
60-120 thousand Brazilian reais	Male	Carlos Augusto Rosa	Microbiologia e Parasitologia	Life Sciences
60-120 thousand Brazilian reais	Male	Jose Paulo Gagliardi Leite	Microbiologia e Parasitologia	Life Sciences
60-120 thousand Brazilian reais	Male	Zoilo Pires de Camargo	Microbiologia e Parasitologia	Life Sciences
60-120 thousand Brazilian reais	Female	Marilene Henning Vainstein	Microbiologia e Parasitologia	Life Sciences
60-120 thousand Brazilian reais	Male	Jaime Martins de Santana	Microbiologia e Parasitologia	Life Sciences
60-120 thousand Brazilian reais	Male	Claudio Antonio Bonjardim	Microbiologia e Parasitologia	Life Sciences
60-120 thousand Brazilian reais	Female	Marta Maria Geraldes Teixeira	Microbiologia e Parasitologia	Life Sciences
60-120 thousand Brazilian reais	Female	Norma Suely de Oliveira Santos	Microbiologia e Parasitologia	Life Sciences
60-120 thousand Brazilian reais	Male	Diogenes Santiago Santos	Microbiologia e Parasitologia	Life Sciences
60-120 thousand Brazilian reais	Male	Edmundo Carlos Grisard	Microbiologia e Parasitologia	Life Sciences
60-120 thousand Brazilian reais	Male	Luciano Andrade Moreira	Microbiologia e Parasitologia	Life Sciences
60-120 thousand Brazilian reais	Male	Bernardo Galvão Castro Filho	Microbiologia e Parasitologia	Life Sciences
60-120 thousand Brazilian reais	Male	Wanderley de Souza	Microbiologia e Parasitologia	Life Sciences
60-120 thousand Brazilian reais	Female	Galba Maria de Campos-Takaki	Microbiologia e Parasitologia	Life Sciences
60-120 thousand Brazilian reais	Female	Ana Lúcia Sampaio Sgambatti de Andrade	Microbiologia e Parasitologia	Life Sciences
60-120 thousand Brazilian reais	Female	Neuza Maria Alcântara-Neves	Microbiologia e Parasitologia	Life Sciences
60-120 thousand Brazilian reais	Male	Dirceu Costa	Educação Física, Fonoaudiologia, Fisioterapia e Terapia Ocupacional	Life Sciences
60-120 thousand Brazilian reais	Male	Sergio Teixeira da Fonseca	Educação Física, Fonoaudiologia, Fisioterapia e Terapia Ocupacional	Life Sciences
60-120 thousand Brazilian reais	Male	José Angelo Barela	Educação Física, Fonoaudiologia, Fisioterapia e Terapia Ocupacional	Life Sciences
60-120 thousand Brazilian reais	Male	Alexandre Hideki Okano	Educação Física, Fonoaudiologia, Fisioterapia e Terapia Ocupacional	Life Sciences
60-120 thousand Brazilian reais	Male	Pedro Rodrigues Curi Hallal	Educação Física, Fonoaudiologia, Fisioterapia e Terapia Ocupacional	Life Sciences
60-120 thousand Brazilian reais	Male	Andre Luiz Felix Rodacki	Educação Física, Fonoaudiologia, Fisioterapia e Terapia Ocupacional	Life Sciences
60-120 thousand Brazilian reais	Male	Armele de Fátima Dornelas de Andrade	Educação Física, Fonoaudiologia, Fisioterapia e Terapia Ocupacional	Life Sciences
60-120 thousand Brazilian reais	Female	Nelson Medeiros de Lima Filho	Engenharia Química	Exact Sciences
60-120 thousand Brazilian reais	Female	Leda dos Reis Castilho	Engenharia Química	Exact Sciences
60-120 thousand Brazilian reais	Male	Giancarlo Richard Salazar Banda	Engenharia Química	Exact Sciences
60-120 thousand Brazilian reais	Male	David Alexander Mitchell	Engenharia Química	Exact Sciences
60-120 thousand Brazilian reais	Male	Luismar Marques Porto	Engenharia Química	Exact Sciences
60-120 thousand Brazilian reais	Female	Regina de Fatima Peralta Muniz Moreira	Engenharia Química	Exact Sciences
60-120 thousand Brazilian reais	Female	Meuris Gurgel Carlos da Silva	Engenharia Química	Exact Sciences
60-120 thousand Brazilian reais	Male	Venerando Eustáquio Amaro	Ciências Ambientais	Exact Sciences
60-120 thousand Brazilian reais	Male	Paulo Eduardo Artaxo Netto	Ciências Ambientais	Exact Sciences
60-120 thousand Brazilian reais	Male	Reinaldo Antônio Petta	Ciências Ambientais	Exact Sciences
60-120 thousand Brazilian reais	Female	Rejane Helena Ribeiro da Costa	Ciências Ambientais	Exact Sciences
60-120 thousand Brazilian reais	Male	Mario Takayuki Kato	Ciências Ambientais	Exact Sciences
60-120 thousand Brazilian reais	Female	Eliane Bezerra Cavalcanti	Ciências Ambientais	Exact Sciences
60-120 thousand Brazilian reais	Male	Britaldo Silveira Soares Filho	Ciências Ambientais	Exact Sciences
60-120 thousand Brazilian reais	Male	Silvio Roberto Taffarel	Ciências Ambientais	Exact Sciences
60-120 thousand Brazilian reais	Male	Javier Tomasella	Ciências Ambientais	Exact Sciences
60-120 thousand Brazilian reais	Male	Sergio Francisco de Aquino	Ciências Ambientais	Exact Sciences
60-120 thousand Brazilian reais	Male	Luiz Sergio Philippi	Ciências Ambientais	Exact Sciences
60-120 thousand Brazilian reais	Female	Márcia Maria Rios Ribeiro	Ciências Ambientais	Exact Sciences
60-120 thousand Brazilian reais	Male	Rodrigo Braga Moruzzi	Ciências Ambientais	Exact Sciences
60-120 thousand Brazilian reais	Male	Fabricio Anibal Corradini	Ciências Ambientais	Exact Sciences
60-120 thousand Brazilian reais	Male	Eduardo Landulfo	Ciências Ambientais	Exact Sciences
60-120 thousand Brazilian reais	Male	Klebber Teodomiro Martins Formiga	Ciências Ambientais	Exact Sciences
60-120 thousand Brazilian reais	Male	Vinícius Verna Magalhães Ferreira	Ciências Ambientais	Exact Sciences
60-120 thousand Brazilian reais	Male	André Bezerra dos Santos	Ciências Ambientais	Exact Sciences
60-120 thousand Brazilian reais	Male	Augusto Cesar	Ciências Ambientais	Exact Sciences
60-120 thousand Brazilian reais	Female	Katia Alcione Kopp	Ciências Ambientais	Exact Sciences
60-120 thousand Brazilian reais	Female	Patricia Krecl	Ciências Ambientais	Exact Sciences
60-120 thousand Brazilian reais	Male	Carlos Augusto de Lemos Chernicharo	Ciências Ambientais	Exact Sciences
60-120 thousand Brazilian reais	Male	Jorge Rubio	Ciências Ambientais	Exact Sciences
60-120 thousand Brazilian reais	Male	Carlos Eduardo Pellegrino Cerri	Ciências Ambientais	Exact Sciences
60-120 thousand Brazilian reais	Male	Ulysses Paulino de Albuquerque	Ciências Ambientais	Exact Sciences
60-120 thousand Brazilian reais	Male	Francisco de Assis de Souza Filho	Ciências Ambientais	Exact Sciences
60-120 thousand Brazilian reais	Female	Rosangela Paula Teixeira Lessa	Aqüicultura e Recursos Pesqueiros	Life Sciences
60-120 thousand Brazilian reais	Male	Jose Angel Alvarez Perez	Aqüicultura e Recursos Pesqueiros	Life Sciences
60-120 thousand Brazilian reais	Female	Maria Célia Portella	Aqüicultura e Recursos Pesqueiros	Life Sciences
60-120 thousand Brazilian reais	Female	Andréa Bialetzki	Aqüicultura e Recursos Pesqueiros	Life Sciences
60-120 thousand Brazilian reais	Male	Humberto Gomes Hazin	Aqüicultura e Recursos Pesqueiros	Life Sciences
60-120 thousand Brazilian reais	Male	Nilo Bazzoli	Aqüicultura e Recursos Pesqueiros	Life Sciences
60-120 thousand Brazilian reais	Male	Evoy Zaniboni Filho	Aqüicultura e Recursos Pesqueiros	Life Sciences
60-120 thousand Brazilian reais	Male	Luis Antonio de Oliveira Proença	Aqüicultura e Recursos Pesqueiros	Life Sciences
60-120 thousand Brazilian reais	Female	Tereza Cristina Scatena Villa	Enfermagem	Life Sciences
60-120 thousand Brazilian reais	Female	Isabel Amélia Costa Mendes	Enfermagem	Life Sciences
60-120 thousand Brazilian reais	Female	Alacoque Lorenzini Erdmann	Enfermagem	Life Sciences
60-120 thousand Brazilian reais	Female	Lorita Marlena Freitag Pagliuca	Enfermagem	Life Sciences
60-120 thousand Brazilian reais	Female	Roseni Rosângela de Sena	Enfermagem	Life Sciences
60-120 thousand Brazilian reais	Female	Cibele Andrucioli de Mattos Pimenta	Enfermagem	Life Sciences
60-120 thousand Brazilian reais	Female	Maria Salete Bessa Jorge	Enfermagem	Life Sciences
60-120 thousand Brazilian reais	Female	Marluce Maria Araújo Assis	Enfermagem	Life Sciences
60-120 thousand Brazilian reais	Female	Maria Gaby Rivero de Gutiérrez	Enfermagem	Life Sciences
60-120 thousand Brazilian reais	Male	Ricardo Ribeiro dos Santos	Biotecnologia	Life Sciences
60-120 thousand Brazilian reais	Male	Luiz Ricardo Goulart Filho	Biotecnologia	Life Sciences
60-120 thousand Brazilian reais	Male	Dario Grattapaglia	Biotecnologia	Life Sciences
60-120 thousand Brazilian reais	Female	Vanete Thomaz Soccol	Biotecnologia	Life Sciences
60-120 thousand Brazilian reais	Female	Maria Luiza Vilela Oliva	Biotecnologia	Life Sciences
60-120 thousand Brazilian reais	Male	Octavio Luiz Franco	Biotecnologia	Life Sciences
60-120 thousand Brazilian reais	Male	Marcio Alves Ferreira	Biotecnologia	Life Sciences
60-120 thousand Brazilian reais	Female	Claudia do Ó Pessoa	Biotecnologia	Life Sciences
60-120 thousand Brazilian reais	Male	Fabio de Lima Leite	Biotecnologia	Life Sciences
60-120 thousand Brazilian reais	Female	Francine Ferreira Padilha	Biotecnologia	Life Sciences
60-120 thousand Brazilian reais	Male	Alan John Alexander McBride	Biotecnologia	Life Sciences
60-120 thousand Brazilian reais	Male	José Ricardo de Figueiredo	Biotecnologia	Life Sciences
60-120 thousand Brazilian reais	Male	Adalberto Pessoa Junior	Biotecnologia	Life Sciences
60-120 thousand Brazilian reais	Female	Maria Fatima Grossi de Sa	Biotecnologia	Life Sciences
60-120 thousand Brazilian reais	Male	Rodrigo Guerino Stabeli	Biotecnologia	Life Sciences
60-120 thousand Brazilian reais	Male	Rogerio Margis	Biotecnologia	Life Sciences
60-120 thousand Brazilian reais	Female	Celia Regina Ribeiro da Silva Carlini	Biotecnologia	Life Sciences
60-120 thousand Brazilian reais	Female	Amelia Teresinha Henriques	Farmácia	Life Sciences
60-120 thousand Brazilian reais	Male	Mario Hiroyuki Hirata	Farmácia	Life Sciences
60-120 thousand Brazilian reais	Male	Marcelo Sobral da Silva	Farmácia	Life Sciences
60-120 thousand Brazilian reais	Male	Ivan da Rocha Pitta	Farmácia	Life Sciences
60-120 thousand Brazilian reais	Male	Jose Guilherme Soares Maia	Farmácia	Life Sciences
60-120 thousand Brazilian reais	Female	Sílvia Stanisçuaski Guterres	Farmácia	Life Sciences
60-120 thousand Brazilian reais	Female	Tania Beatriz Creczynski Pasa	Farmácia	Life Sciences
60-120 thousand Brazilian reais	Female	Maria Vitória Lopes Badra Bentley	Farmácia	Life Sciences
60-120 thousand Brazilian reais	Male	Ricardo Tadeu Lopes	Energia Nuclear, Energia Renovável e Planejamento Energético	Exact Sciences
60-120 thousand Brazilian reais	Male	Carlos Costa Dantas	Energia Nuclear, Energia Renovável e Planejamento Energético	Exact Sciences
60-120 thousand Brazilian reais	Male	Roberto Vicente	Energia Nuclear, Energia Renovável e Planejamento Energético	Exact Sciences
60-120 thousand Brazilian reais	Male	Eurípedes do Amaral Vargas Junior	Engenharia Civil	Exact Sciences
60-120 thousand Brazilian reais	Male	Fernando Artur Brasil Danziger	Engenharia Civil	Exact Sciences
60-120 thousand Brazilian reais	Male	Fernando Saboya Albuquerque Junior	Engenharia Civil	Exact Sciences
60-120 thousand Brazilian reais	Male	Alvaro Luiz Gayoso de Azeredo Coutinho	Engenharia Civil	Exact Sciences
60-120 thousand Brazilian reais	Female	Ana Paula Kirchheim	Engenharia Civil	Exact Sciences
60-120 thousand Brazilian reais	Male	Eduardo de Moraes Rego Fairbairn	Engenharia Civil	Exact Sciences
60-120 thousand Brazilian reais	Female	Janaíde Cavalcante Rocha	Engenharia Civil	Exact Sciences
60-120 thousand Brazilian reais	Male	Miguel Alexandre Novak	Física e Astronomia	Exact Sciences
60-120 thousand Brazilian reais	Male	José Renan de Medeiros	Física e Astronomia	Exact Sciences
60-120 thousand Brazilian reais	Male	Valtencir Zucolotto	Física e Astronomia	Exact Sciences
60-120 thousand Brazilian reais	Male	Kleber Daum Machado	Física e Astronomia	Exact Sciences
60-120 thousand Brazilian reais	Male	Daniel Felinto Pires Barbosa	Física e Astronomia	Exact Sciences
60-120 thousand Brazilian reais	Male	Gilberto Medeiros Ribeiro	Física e Astronomia	Exact Sciences
60-120 thousand Brazilian reais	Male	Gennady Gusev	Física e Astronomia	Exact Sciences
60-120 thousand Brazilian reais	Male	Wido Herwig Schreiner	Física e Astronomia	Exact Sciences
60-120 thousand Brazilian reais	Male	Philippe Wilhelm Courteille	Física e Astronomia	Exact Sciences
60-120 thousand Brazilian reais	Male	Stephen Patrick Walborn	Física e Astronomia	Exact Sciences
60-120 thousand Brazilian reais	Male	Leandro José Raniero	Física e Astronomia	Exact Sciences
60-120 thousand Brazilian reais	Female	Katiuscia Nadyne Cassemiro	Física e Astronomia	Exact Sciences
60-120 thousand Brazilian reais	Male	Alessandro de Sousa Villar	Física e Astronomia	Exact Sciences
60-120 thousand Brazilian reais	Male	Hellmut Eckert	Física e Astronomia	Exact Sciences
60-120 thousand Brazilian reais	Male	Iberê Luiz Caldas	Física e Astronomia	Exact Sciences
60-120 thousand Brazilian reais	Female	Maria Beatriz de Mello e Souza	Artes, Ciência da Informação e Comunicação	Humanities
60-120 thousand Brazilian reais	Male	Raimundo Nonato Macedo dos Santos	Artes, Ciência da Informação e Comunicação	Humanities
60-120 thousand Brazilian reais	Female	Maria Cristina da Rosa Fonseca da Silva	Artes, Ciência da Informação e Comunicação	Humanities
60-120 thousand Brazilian reais	Male	Daniel Marcal de Queiroz	Engenharia Agrícola	Exact Sciences
60-120 thousand Brazilian reais	Male	Luiz Antonio Lima	Engenharia Agrícola	Exact Sciences
60-120 thousand Brazilian reais	Male	Demetrius David da Silva	Engenharia Agrícola	Exact Sciences
60-120 thousand Brazilian reais	Male	Nereu Augusto Streck	Engenharia Agrícola	Exact Sciences
60-120 thousand Brazilian reais	Male	Rouverson Pereira da Silva	Engenharia Agrícola	Exact Sciences
60-120 thousand Brazilian reais	Male	Nildo da Silva Dias	Engenharia Agrícola	Exact Sciences
60-120 thousand Brazilian reais	Male	Luís Carlos Timm	Engenharia Agrícola	Exact Sciences
60-120 thousand Brazilian reais	Male	Alexandre Bryan Heinemann	Engenharia Agrícola	Exact Sciences
60-120 thousand Brazilian reais	Male	Pierre Kaufmann	Engenharia Elétrica e Biomédica	Exact Sciences
60-120 thousand Brazilian reais	Male	Denis Vinicius Coury	Engenharia Elétrica e Biomédica	Exact Sciences
60-120 thousand Brazilian reais	Male	Carlos Eduardo Pedreira	Engenharia Elétrica e Biomédica	Exact Sciences
60-120 thousand Brazilian reais	Male	Denizar Cruz Martins	Engenharia Elétrica e Biomédica	Exact Sciences
60-120 thousand Brazilian reais	Male	Luiz Wagner Pereira Biscainho	Engenharia Elétrica e Biomédica	Exact Sciences
60-120 thousand Brazilian reais	Male	Moises Vidal Ribeiro	Engenharia Elétrica e Biomédica	Exact Sciences
60-120 thousand Brazilian reais	Male	José Renes Pinheiro	Engenharia Elétrica e Biomédica	Exact Sciences
60-120 thousand Brazilian reais	Male	Adalberto José Batista	Engenharia Elétrica e Biomédica	Exact Sciences
60-120 thousand Brazilian reais	Male	Ademir de Jesus Amaral	Engenharia Elétrica e Biomédica	Exact Sciences
60-120 thousand Brazilian reais	Male	Francisco Kleber de Araújo Lima	Engenharia Elétrica e Biomédica	Exact Sciences
60-120 thousand Brazilian reais	Male	Antônio Carlos Shimano	Engenharia Elétrica e Biomédica	Exact Sciences
60-120 thousand Brazilian reais	Male	Demercil de Souza Oliveira Júnior	Engenharia Elétrica e Biomédica	Exact Sciences
60-120 thousand Brazilian reais	Male	Ricardo Arraes de Alencar Ximenes	Saúde Coletiva e Nutrição	Life Sciences
60-120 thousand Brazilian reais	Female	Maria Cecilia de Souza Minayo	Saúde Coletiva e Nutrição	Life Sciences
60-120 thousand Brazilian reais	Female	Elen Rose Lodeiro Castanheira	Saúde Coletiva e Nutrição	Life Sciences
60-120 thousand Brazilian reais	Male	Bernardo Lessa Horta	Saúde Coletiva e Nutrição	Life Sciences
60-120 thousand Brazilian reais	Male	Francisco Inacio Pinkusfeld Monteiro Bastos	Saúde Coletiva e Nutrição	Life Sciences
60-120 thousand Brazilian reais	Male	Luiz Carlos de Oliveira Cecilio	Saúde Coletiva e Nutrição	Life Sciences
60-120 thousand Brazilian reais	Female	Ana Lúcia Escobar	Saúde Coletiva e Nutrição	Life Sciences
60-120 thousand Brazilian reais	Female	Iná da Silva dos Santos	Saúde Coletiva e Nutrição	Life Sciences
60-120 thousand Brazilian reais	Female	Egle Machado de Almeida Siqueira	Saúde Coletiva e Nutrição	Life Sciences
60-120 thousand Brazilian reais	Female	Carla Barbosa Nonino	Saúde Coletiva e Nutrição	Life Sciences
60-120 thousand Brazilian reais	Female	Rosângela Alves Pereira	Saúde Coletiva e Nutrição	Life Sciences
60-120 thousand Brazilian reais	Female	Elvira Maria Guerra Shinohara	Saúde Coletiva e Nutrição	Life Sciences
60-120 thousand Brazilian reais	Male	Mauricio Lima Barreto	Saúde Coletiva e Nutrição	Life Sciences
60-120 thousand Brazilian reais	Female	Patrícia Cristina Lisbôa da Silva	Saúde Coletiva e Nutrição	Life Sciences
60-120 thousand Brazilian reais	Male	Malaquias Batista Filho	Saúde Coletiva e Nutrição	Life Sciences
60-120 thousand Brazilian reais	Male	Djanilson Barbosa dos Santos	Saúde Coletiva e Nutrição	Life Sciences
60-120 thousand Brazilian reais	Female	Ana Maria Baptista Menezes	Saúde Coletiva e Nutrição	Life Sciences
60-120 thousand Brazilian reais	Female	Fernanda Chiarello Stedile	Microeletrônica	Exact Sciences
60-120 thousand Brazilian reais	Male	Ricardo Augusto da Luz Reis	Microeletrônica	Exact Sciences
60-120 thousand Brazilian reais	Male	Vitor Augusto Ozaki	Administração, Contabilidade e Economia	Humanities
60-120 thousand Brazilian reais	Male	Allan Claudius Queiroz Barbosa	Administração, Contabilidade e Economia	Humanities
60-120 thousand Brazilian reais	Male	Marcelo Cunha Medeiros	Administração, Contabilidade e Economia	Humanities
60-120 thousand Brazilian reais	Female	Denise Del Prá Netto Machado	Administração, Contabilidade e Economia	Humanities
60-120 thousand Brazilian reais	Male	José Afonso Mazzon	Administração, Contabilidade e Economia	Humanities
60-120 thousand Brazilian reais	Male	Washington Jose de Souza	Administração, Contabilidade e Economia	Humanities
60-120 thousand Brazilian reais	Male	Alexandre Almir Ferreira Rivas	Administração, Contabilidade e Economia	Humanities
60-120 thousand Brazilian reais	Male	José Ricardo Costa de Mendonça	Administração, Contabilidade e Economia	Humanities
60-120 thousand Brazilian reais	Male	Edgard Bruno Cornacchione Junior	Administração, Contabilidade e Economia	Humanities
60-120 thousand Brazilian reais	Male	Claudio Abramovay Ferraz do Amaral	Administração, Contabilidade e Economia	Humanities
60-120 thousand Brazilian reais	Female	Vera Maria Rodrigues Ponte	Administração, Contabilidade e Economia	Humanities
60-120 thousand Brazilian reais	Male	Herbert Kimura	Administração, Contabilidade e Economia	Humanities
60-120 thousand Brazilian reais	Male	Salomão Alencar de Farias	Administração, Contabilidade e Economia	Humanities
60-120 thousand Brazilian reais	Male	Paulo Antonio Zawislak	Administração, Contabilidade e Economia	Humanities
60-120 thousand Brazilian reais	Male	Raimundo Wilane de Figueiredo	Ciência e Tecnologia de Alimentos	Life Sciences
60-120 thousand Brazilian reais	Male	Antonio José de Almeida Meirelles	Ciência e Tecnologia de Alimentos	Life Sciences
60-120 thousand Brazilian reais	Female	Elza Iouko Ida	Ciência e Tecnologia de Alimentos	Life Sciences
60-120 thousand Brazilian reais	Female	Célia Colli	Ciência e Tecnologia de Alimentos	Life Sciences
60-120 thousand Brazilian reais	Male	Otniel Freitas Silva	Ciência e Tecnologia de Alimentos	Life Sciences
60-120 thousand Brazilian reais	Male	Luis Antonio Minim	Ciência e Tecnologia de Alimentos	Life Sciences
60-120 thousand Brazilian reais	Female	Claire Tondo Vendruscolo	Ciência e Tecnologia de Alimentos	Life Sciences
60-120 thousand Brazilian reais	Female	Maria Emília Sousa Gomes Pimenta	Ciência e Tecnologia de Alimentos	Life Sciences
60-120 thousand Brazilian reais	Male	Carlos Wanderlei Piler de Carvalho	Ciência e Tecnologia de Alimentos	Life Sciences
60-120 thousand Brazilian reais	Male	Narendra Narain	Ciência e Tecnologia de Alimentos	Life Sciences
60-120 thousand Brazilian reais	Female	Vania Regina Nicoletti Telis	Ciência e Tecnologia de Alimentos	Life Sciences
60-120 thousand Brazilian reais	Male	Luís Augusto Nero	Ciência e Tecnologia de Alimentos	Life Sciences
60-120 thousand Brazilian reais	Female	Eliana Badiale Furlong	Ciência e Tecnologia de Alimentos	Life Sciences
60-120 thousand Brazilian reais	Female	Susana Juliano Kalil	Ciência e Tecnologia de Alimentos	Life Sciences
60-120 thousand Brazilian reais	Male	Evandro Leite de Souza	Ciência e Tecnologia de Alimentos	Life Sciences
60-120 thousand Brazilian reais	Male	Cesar Valmor Rombaldi	Ciência e Tecnologia de Alimentos	Life Sciences
60-120 thousand Brazilian reais	Female	Rosane Freitas Schwan	Ciência e Tecnologia de Alimentos	Life Sciences
60-120 thousand Brazilian reais	Male	Ivan Antônio Izquierdo	Biofísica, Bioquímica, Farmacologia, Fisiologia e Neurociências	Life Sciences
60-120 thousand Brazilian reais	Male	Sergio Verjovski Almeida	Biofísica, Bioquímica, Farmacologia, Fisiologia e Neurociências	Life Sciences
60-120 thousand Brazilian reais	Male	Marcus Vinicius Gomez	Biofísica, Bioquímica, Farmacologia, Fisiologia e Neurociências	Life Sciences
60-120 thousand Brazilian reais	Male	Walter Araujo Zin	Biofísica, Bioquímica, Farmacologia, Fisiologia e Neurociências	Life Sciences
60-120 thousand Brazilian reais	Male	Moacir Wajner	Biofísica, Bioquímica, Farmacologia, Fisiologia e Neurociências	Life Sciences
60-120 thousand Brazilian reais	Male	Ubiratan Fabres Machado	Biofísica, Bioquímica, Farmacologia, Fisiologia e Neurociências	Life Sciences
60-120 thousand Brazilian reais	Female	Rosalia Mendez-Otero	Biofísica, Bioquímica, Farmacologia, Fisiologia e Neurociências	Life Sciences
60-120 thousand Brazilian reais	Male	Joao Batista Calixto	Biofísica, Bioquímica, Farmacologia, Fisiologia e Neurociências	Life Sciences
60-120 thousand Brazilian reais	Male	Jerson Lima da Silva	Biofísica, Bioquímica, Farmacologia, Fisiologia e Neurociências	Life Sciences
60-120 thousand Brazilian reais	Male	José Luiz de Lima Filho	Biofísica, Bioquímica, Farmacologia, Fisiologia e Neurociências	Life Sciences
60-120 thousand Brazilian reais	Male	Elisardo Corral Vasquez	Biofísica, Bioquímica, Farmacologia, Fisiologia e Neurociências	Life Sciences
60-120 thousand Brazilian reais	Female	Patricia Torres Bozza	Biofísica, Bioquímica, Farmacologia, Fisiologia e Neurociências	Life Sciences
60-120 thousand Brazilian reais	Female	Virgínia Soares Lemos	Biofísica, Bioquímica, Farmacologia, Fisiologia e Neurociências	Life Sciences
60-120 thousand Brazilian reais	Female	Thereza Christina Barja Fidalgo	Biofísica, Bioquímica, Farmacologia, Fisiologia e Neurociências	Life Sciences
60-120 thousand Brazilian reais	Male	Sandro José de Souza	Biofísica, Bioquímica, Farmacologia, Fisiologia e Neurociências	Life Sciences
60-120 thousand Brazilian reais	Male	Rafael Roesler	Biofísica, Bioquímica, Farmacologia, Fisiologia e Neurociências	Life Sciences
60-120 thousand Brazilian reais	Male	Rafael Linden	Biofísica, Bioquímica, Farmacologia, Fisiologia e Neurociências	Life Sciences
60-120 thousand Brazilian reais	Male	Benildo Sousa Cavada	Biofísica, Bioquímica, Farmacologia, Fisiologia e Neurociências	Life Sciences
60-120 thousand Brazilian reais	Male	Ronaldo de Albuquerque Ribeiro	Biofísica, Bioquímica, Farmacologia, Fisiologia e Neurociências	Life Sciences
60-120 thousand Brazilian reais	Male	Igor Polikarpov	Biofísica, Bioquímica, Farmacologia, Fisiologia e Neurociências	Life Sciences
60-120 thousand Brazilian reais	Male	Luis Eduardo Soares Netto	Biofísica, Bioquímica, Farmacologia, Fisiologia e Neurociências	Life Sciences
60-120 thousand Brazilian reais	Male	Claudio Da Cunha	Biofísica, Bioquímica, Farmacologia, Fisiologia e Neurociências	Life Sciences
60-120 thousand Brazilian reais	Male	Antonio Carlos Campos de Carvalho	Biofísica, Bioquímica, Farmacologia, Fisiologia e Neurociências	Life Sciences
60-120 thousand Brazilian reais	Male	Sergio Teixeira Ferreira	Biofísica, Bioquímica, Farmacologia, Fisiologia e Neurociências	Life Sciences
60-120 thousand Brazilian reais	Female	Patricia Rieken Macedo Rocco	Biofísica, Bioquímica, Farmacologia, Fisiologia e Neurociências	Life Sciences
60-120 thousand Brazilian reais	Female	Angela Terezinha de Souza Wyse	Biofísica, Bioquímica, Farmacologia, Fisiologia e Neurociências	Life Sciences
60-120 thousand Brazilian reais	Male	José Antunes Rodrigues	Biofísica, Bioquímica, Farmacologia, Fisiologia e Neurociências	Life Sciences
60-120 thousand Brazilian reais	Female	Patrícia Maria Guedes Paiva	Biofísica, Bioquímica, Farmacologia, Fisiologia e Neurociências	Life Sciences
60-120 thousand Brazilian reais	Male	Luiz Bezerra de Carvalho Junior	Biofísica, Bioquímica, Farmacologia, Fisiologia e Neurociências	Life Sciences
60-120 thousand Brazilian reais	Male	Alvaro Augusto da Costa Leitão	Biofísica, Bioquímica, Farmacologia, Fisiologia e Neurociências	Life Sciences
60-120 thousand Brazilian reais	Female	Maria Helena Catelli de Carvalho	Biofísica, Bioquímica, Farmacologia, Fisiologia e Neurociências	Life Sciences
60-120 thousand Brazilian reais	Male	Jose Antonio Eiras	Engenharia de Minas, Metalúrgica e de Materiais	Exact Sciences
60-120 thousand Brazilian reais	Female	Elisabete Frollini	Engenharia de Minas, Metalúrgica e de Materiais	Exact Sciences
60-120 thousand Brazilian reais	Male	Carlos Hoffmann Sampaio	Engenharia de Minas, Metalúrgica e de Materiais	Exact Sciences
60-120 thousand Brazilian reais	Male	Edgar Dutra Zanotto	Engenharia de Minas, Metalúrgica e de Materiais	Exact Sciences
60-120 thousand Brazilian reais	Male	Rubens Caram Junior	Engenharia de Minas, Metalúrgica e de Materiais	Exact Sciences
60-120 thousand Brazilian reais	Male	Carlos Pérez Bergmann	Engenharia de Minas, Metalúrgica e de Materiais	Exact Sciences
60-120 thousand Brazilian reais	Male	Andre Paulo Tschiptschin	Engenharia de Minas, Metalúrgica e de Materiais	Exact Sciences
60-120 thousand Brazilian reais	Male	Amauri Garcia	Engenharia de Minas, Metalúrgica e de Materiais	Exact Sciences
60-120 thousand Brazilian reais	Male	Carlos Nelson Elias	Engenharia de Minas, Metalúrgica e de Materiais	Exact Sciences
60-120 thousand Brazilian reais	Male	Edvani Curti Muniz	Engenharia de Minas, Metalúrgica e de Materiais	Exact Sciences
60-120 thousand Brazilian reais	Female	Edcleide Maria Araújo	Engenharia de Minas, Metalúrgica e de Materiais	Exact Sciences
60-120 thousand Brazilian reais	Female	Denise Crocce Romano Espinosa	Engenharia de Minas, Metalúrgica e de Materiais	Exact Sciences
60-120 thousand Brazilian reais	Female	Ana Cristina Figueiredo de Melo Costa	Engenharia de Minas, Metalúrgica e de Materiais	Exact Sciences
60-120 thousand Brazilian reais	Male	Tomás Jeferson Alves de Mélo	Engenharia de Minas, Metalúrgica e de Materiais	Exact Sciences
60-120 thousand Brazilian reais	Female	Iêda Maria Garcia dos Santos	Engenharia de Minas, Metalúrgica e de Materiais	Exact Sciences
60-120 thousand Brazilian reais	Male	Claudemiro Bolfarini	Engenharia de Minas, Metalúrgica e de Materiais	Exact Sciences
60-120 thousand Brazilian reais	Female	Liane Roldo	Desenho Industrial	Exact Sciences
60-120 thousand Brazilian reais	Male	Marcelo Marcio Soares	Desenho Industrial	Exact Sciences
60-120 thousand Brazilian reais	Male	Julio Scharfstein	Imunologia	Life Sciences
60-120 thousand Brazilian reais	Male	Rodrigo Correa de Oliveira	Imunologia	Life Sciences
60-120 thousand Brazilian reais	Male	Alberto Felix Antonio da Nobrega	Imunologia	Life Sciences
60-120 thousand Brazilian reais	Male	Luiz Vicente Rizzo	Imunologia	Life Sciences
60-120 thousand Brazilian reais	Male	Edgar Marcelino de Carvalho Filho	Imunologia	Life Sciences
60-120 thousand Brazilian reais	Male	Joao Paulo de Biaso Viola	Imunologia	Life Sciences
60-120 thousand Brazilian reais	Female	Marcela de Freitas Lopes	Imunologia	Life Sciences
60-120 thousand Brazilian reais	Female	Simone Gonçalves da Fonseca	Imunologia	Life Sciences
60-120 thousand Brazilian reais	Female	Milena Botelho Pereira Soares	Imunologia	Life Sciences
60-120 thousand Brazilian reais	Male	Andre Luiz Barbosa Bafica	Imunologia	Life Sciences
60-120 thousand Brazilian reais	Female	Selma Maria Bezerra Jeronimo	Imunologia	Life Sciences
60-120 thousand Brazilian reais	Female	Silvia Azucena Nebra de Pérez	Engenharia Mecânica, Naval e Oceânica e Aeroespacial	Exact Sciences
60-120 thousand Brazilian reais	Female	Marcia Barbosa Henriques Mantelli	Engenharia Mecânica, Naval e Oceânica e Aeroespacial	Exact Sciences
60-120 thousand Brazilian reais	Male	Rubens Sampaio Filho	Engenharia Mecânica, Naval e Oceânica e Aeroespacial	Exact Sciences
60-120 thousand Brazilian reais	Male	Paulo Roberto de Souza Mendes	Engenharia Mecânica, Naval e Oceânica e Aeroespacial	Exact Sciences
60-120 thousand Brazilian reais	Male	Julio César Passos	Engenharia Mecânica, Naval e Oceânica e Aeroespacial	Exact Sciences
60-120 thousand Brazilian reais	Male	Aristeu da Silveira Neto	Engenharia Mecânica, Naval e Oceânica e Aeroespacial	Exact Sciences
60-120 thousand Brazilian reais	Male	Luis Rogerio de Oliveira Hein	Engenharia Mecânica, Naval e Oceânica e Aeroespacial	Exact Sciences
60-120 thousand Brazilian reais	Female	Carla Simone Tafuri Marques	Engenharia Mecânica, Naval e Oceânica e Aeroespacial	Exact Sciences
60-120 thousand Brazilian reais	Male	Dermeval Carinhana Junior	Engenharia Mecânica, Naval e Oceânica e Aeroespacial	Exact Sciences
60-120 thousand Brazilian reais	Male	Jose Viriato Coelho Vargas	Engenharia Mecânica, Naval e Oceânica e Aeroespacial	Exact Sciences
60-120 thousand Brazilian reais	Female	Angela Ourivio Nieckele	Engenharia Mecânica, Naval e Oceânica e Aeroespacial	Exact Sciences
60-120 thousand Brazilian reais	Female	Maria Odila Hilário Cioffi	Engenharia Mecânica, Naval e Oceânica e Aeroespacial	Exact Sciences
60-120 thousand Brazilian reais	Male	Gilberto Petraconi Filho	Engenharia Mecânica, Naval e Oceânica e Aeroespacial	Exact Sciences
60-120 thousand Brazilian reais	Male	Antonio Gilson Barbosa de Lima	Engenharia Mecânica, Naval e Oceânica e Aeroespacial	Exact Sciences
60-120 thousand Brazilian reais	Male	Claudio Ruggieri	Engenharia Mecânica, Naval e Oceânica e Aeroespacial	Exact Sciences
60-120 thousand Brazilian reais	Male	Helcio Rangel Barreto Orlande	Engenharia Mecânica, Naval e Oceânica e Aeroespacial	Exact Sciences
60-120 thousand Brazilian reais	Male	Guarino Rinaldi Colli	Zoologia	Life Sciences
60-120 thousand Brazilian reais	Male	José Albertino Rafael	Zoologia	Life Sciences
60-120 thousand Brazilian reais	Male	Jorge Luiz Nessimian	Zoologia	Life Sciences
60-120 thousand Brazilian reais	Male	Paulo Andreas Buckup	Zoologia	Life Sciences
60-120 thousand Brazilian reais	Female	Claudia Regina Bonini Domingos	Zoologia	Life Sciences
60-120 thousand Brazilian reais	Female	Neusa Hamada	Zoologia	Life Sciences
60-120 thousand Brazilian reais	Male	Paulo Christiano de Anchietta Garcia	Zoologia	Life Sciences
60-120 thousand Brazilian reais	Female	Sandra Madureira	Letras e Lingüística	Humanities
60-120 thousand Brazilian reais	Female	Ana Maria Di Renzo	Letras e Lingüística	Humanities
60-120 thousand Brazilian reais	Male	Jairo Nogueira Luna	Letras e Lingüística	Humanities
60-120 thousand Brazilian reais	Male	Miguel Oliveira Jr	Letras e Lingüística	Humanities
60-120 thousand Brazilian reais	Male	Luiz Antonio Barrera San Martin	Matemática e Estatística	Exact Sciences
60-120 thousand Brazilian reais	Male	Jefferson Antonio Galves	Matemática e Estatística	Exact Sciences
60-120 thousand Brazilian reais	Male	Ricardo Erthal Santelli	Química	Exact Sciences
60-120 thousand Brazilian reais	Male	Marcos Antonio Pinto Martins	Química	Exact Sciences
60-120 thousand Brazilian reais	Female	Heloisa de Oliveira Beraldo	Química	Exact Sciences
60-120 thousand Brazilian reais	Male	Adilson Jose Curtius	Química	Exact Sciences
60-120 thousand Brazilian reais	Female	Sandra Helena Pulcinelli	Química	Exact Sciences
60-120 thousand Brazilian reais	Female	Teresa Dib Zambon Atvars	Química	Exact Sciences
60-120 thousand Brazilian reais	Male	Benedito dos Santos Lima Neto	Química	Exact Sciences
60-120 thousand Brazilian reais	Male	Moacir Geraldo Pizzolatti	Química	Exact Sciences
60-120 thousand Brazilian reais	Male	Antonio Luiz Braga	Química	Exact Sciences
60-120 thousand Brazilian reais	Male	Jorge Mauricio David	Química	Exact Sciences
60-120 thousand Brazilian reais	Male	Helio Alexandre Stefani	Química	Exact Sciences
60-120 thousand Brazilian reais	Male	Júlio Santos Rebouças	Química	Exact Sciences
60-120 thousand Brazilian reais	Male	Edilberto Rocha Silveira	Química	Exact Sciences
60-120 thousand Brazilian reais	Male	Angelo da Cunha Pinto	Química	Exact Sciences
60-120 thousand Brazilian reais	Male	Severino Alves Junior	Química	Exact Sciences
60-120 thousand Brazilian reais	Male	Adriano Defini Andricopulo	Química	Exact Sciences
60-120 thousand Brazilian reais	Male	Carlos Alberto Manssour Fraga	Química	Exact Sciences
60-120 thousand Brazilian reais	Female	Karime Rita de Souza Bentes	Química	Exact Sciences
60-120 thousand Brazilian reais	Male	Antonio Souza de Araujo	Química	Exact Sciences
60-120 thousand Brazilian reais	Male	Gerd Bruno da Rocha	Química	Exact Sciences
60-120 thousand Brazilian reais	Male	Eduardo Carasek da Rocha	Química	Exact Sciences
60-120 thousand Brazilian reais	Male	Newton Martins Barbosa Neto	Química	Exact Sciences
60-120 thousand Brazilian reais	Male	Rodinei Augusti	Química	Exact Sciences
60-120 thousand Brazilian reais	Female	Telma Leda Gomes de Lemos	Química	Exact Sciences
60-120 thousand Brazilian reais	Male	Jailson Bittencourt de Andrade	Química	Exact Sciences
60-120 thousand Brazilian reais	Male	Fernando Barbosa Júnior	Química	Exact Sciences
60-120 thousand Brazilian reais	Male	Antônio Euzébio Goulart Santana	Química	Exact Sciences
60-120 thousand Brazilian reais	Male	Wanderley Jose de Melo	Agronomia	Life Sciences
60-120 thousand Brazilian reais	Male	Jose Carlos Fachinello	Agronomia	Life Sciences
60-120 thousand Brazilian reais	Male	Moacir Pasqual	Agronomia	Life Sciences
60-120 thousand Brazilian reais	Male	Jose Eustaquio de Souza Carneiro	Agronomia	Life Sciences
60-120 thousand Brazilian reais	Male	Ciro Antonio Rosolem	Agronomia	Life Sciences
60-120 thousand Brazilian reais	Male	Mariangela Hungria da Cunha	Agronomia	Life Sciences
60-120 thousand Brazilian reais	Male	Takashi Muraoka	Agronomia	Life Sciences
60-120 thousand Brazilian reais	Male	Manlio Silvestre Fernandes	Agronomia	Life Sciences
60-120 thousand Brazilian reais	Male	Antonio Fernando Caetano Tombolato	Agronomia	Life Sciences
60-120 thousand Brazilian reais	Male	Paulo de Souza Gonçalves	Agronomia	Life Sciences
60-120 thousand Brazilian reais	Male	Paulo Hideo Nakano Rangel	Agronomia	Life Sciences
60-120 thousand Brazilian reais	Male	Reinaldo Bertola Cantarutti	Agronomia	Life Sciences
60-120 thousand Brazilian reais	Female	Lília Sichmann Heiffig-del Aguila	Agronomia	Life Sciences
60-120 thousand Brazilian reais	Male	Gerson Silva Giomo	Agronomia	Life Sciences
60-120 thousand Brazilian reais	Male	Wilson Mozena Leandro	Agronomia	Life Sciences
60-120 thousand Brazilian reais	Male	Gladyston Rodrigues Carvalho	Agronomia	Life Sciences
60-120 thousand Brazilian reais	Male	Robert Weingart Barreto	Agronomia	Life Sciences
60-120 thousand Brazilian reais	Female	Alice Kazuko Inoue Nagata	Agronomia	Life Sciences
60-120 thousand Brazilian reais	Male	Sergio Augusto Morais Carbonell	Agronomia	Life Sciences
60-120 thousand Brazilian reais	Female	Maria Catarina Megumi Kasuya	Agronomia	Life Sciences
60-120 thousand Brazilian reais	Male	Jorge Braz Torres	Agronomia	Life Sciences
60-120 thousand Brazilian reais	Male	Paulo Cezar Ceresini	Agronomia	Life Sciences
60-120 thousand Brazilian reais	Female	Angela Mehta dos Reis	Agronomia	Life Sciences
60-120 thousand Brazilian reais	Male	José Eudes de Morais Oliveira	Agronomia	Life Sciences
60-120 thousand Brazilian reais	Male	Luiz Alexandre Peternelli	Agronomia	Life Sciences
60-120 thousand Brazilian reais	Male	Paulo Guilherme Salvador Wadt	Agronomia	Life Sciences
60-120 thousand Brazilian reais	Male	Maurilio Alves Moreira	Agronomia	Life Sciences
60-120 thousand Brazilian reais	Female	Márcia Soares Chaves	Agronomia	Life Sciences
60-120 thousand Brazilian reais	Female	Maria Esther de Noronha Fonseca	Agronomia	Life Sciences
60-120 thousand Brazilian reais	Male	Angelo Pallini	Agronomia	Life Sciences
60-120 thousand Brazilian reais	Male	Ricardo Lopes	Agronomia	Life Sciences
60-120 thousand Brazilian reais	Male	Carlos Alberto da Silva Ledo	Agronomia	Life Sciences
60-120 thousand Brazilian reais	Male	Walter Esfrain Pereira	Agronomia	Life Sciences
60-120 thousand Brazilian reais	Male	Ado Jorio de Vasconcelos	Agronomia	Life Sciences
60-120 thousand Brazilian reais	Male	Clistenes Williams Araujo do Nascimento	Agronomia	Life Sciences
60-120 thousand Brazilian reais	Female	Maria Isidória Silva Gonzaga	Agronomia	Life Sciences
60-120 thousand Brazilian reais	Male	Raúl Alberto Laumann	Agronomia	Life Sciences
60-120 thousand Brazilian reais	Male	Hugo Alves Pinheiro	Agronomia	Life Sciences
60-120 thousand Brazilian reais	Male	Paulo Cesar Sentelhas	Agronomia	Life Sciences
60-120 thousand Brazilian reais	Male	Carlos Antonio Fernandes Santos	Agronomia	Life Sciences
60-120 thousand Brazilian reais	Male	Leandro Galon	Agronomia	Life Sciences
60-120 thousand Brazilian reais	Female	Mercedes Concórdia Carrão Panizzi	Agronomia	Life Sciences
60-120 thousand Brazilian reais	Male	Carlos Ernesto Goncalves Reynaud Schaefer	Agronomia	Life Sciences
60-120 thousand Brazilian reais	Male	Dirceu Pratissoli	Agronomia	Life Sciences
60-120 thousand Brazilian reais	Male	Joaquim Albenisio Gomes da Silveira	Agronomia	Life Sciences
60-120 thousand Brazilian reais	Male	Antonio Carlos Saraiva da Costa	Agronomia	Life Sciences
60-120 thousand Brazilian reais	Male	José Miguel Reichert	Agronomia	Life Sciences
60-120 thousand Brazilian reais	Male	Renato de Oliveira Resende	Agronomia	Life Sciences
60-120 thousand Brazilian reais	Male	Danilo Rheinheimer dos Santos	Agronomia	Life Sciences
60-120 thousand Brazilian reais	Female	Helenice Vital	Oceanografia	Exact Sciences
60-120 thousand Brazilian reais	Male	Carlos Alberto Eiras Garcia	Oceanografia	Exact Sciences
60-120 thousand Brazilian reais	Male	Julio Cesar de Faria Alvim Wasserman	Oceanografia	Exact Sciences
60-120 thousand Brazilian reais	Female	Elisa Helena Leão Fernandes	Oceanografia	Exact Sciences
60-120 thousand Brazilian reais	Female	Maria Elisabeth de Araújo	Oceanografia	Exact Sciences
60-120 thousand Brazilian reais	Male	Mauricio Magalhães Mata	Oceanografia	Exact Sciences
60-120 thousand Brazilian reais	Male	Nicolai Mirlean	Oceanografia	Exact Sciences
60-120 thousand Brazilian reais	Male	Raul Cavalcante Maranhao	Medicina	Life Sciences
60-120 thousand Brazilian reais	Male	Sergio Paulo Bydlowski	Medicina	Life Sciences
60-120 thousand Brazilian reais	Male	Jorge Pinto Ribeiro	Medicina	Life Sciences
60-120 thousand Brazilian reais	Male	Jair de Jesus Mari	Medicina	Life Sciences
60-120 thousand Brazilian reais	Female	Dulciene Maria de Magalhães Queiroz	Medicina	Life Sciences
60-120 thousand Brazilian reais	Male	Fernando Ferreira Costa	Medicina	Life Sciences
60-120 thousand Brazilian reais	Male	Jose Eduardo Krieger	Medicina	Life Sciences
60-120 thousand Brazilian reais	Female	Maria do Socorro Pombo-de-Oliveira	Medicina	Life Sciences
60-120 thousand Brazilian reais	Male	Luiz Armando Cunha De Marco	Medicina	Life Sciences
60-120 thousand Brazilian reais	Male	Antonio Carlos Campos Pignatari	Medicina	Life Sciences
60-120 thousand Brazilian reais	Female	Margaret de Castro	Medicina	Life Sciences
60-120 thousand Brazilian reais	Male	Fernando Fornari	Medicina	Life Sciences
60-120 thousand Brazilian reais	Female	Sandra Cristina Pereira Costa Fuchs	Medicina	Life Sciences
60-120 thousand Brazilian reais	Male	Jose Guilherme Cecatti	Medicina	Life Sciences
60-120 thousand Brazilian reais	Male	Fernando Augusto Soares	Medicina	Life Sciences
60-120 thousand Brazilian reais	Male	João Luciano de Quevedo	Medicina	Life Sciences
60-120 thousand Brazilian reais	Male	Felipe Dal Pizzol	Medicina	Life Sciences
60-120 thousand Brazilian reais	Female	Heloísa Ramos Lacerda de Melo	Medicina	Life Sciences
60-120 thousand Brazilian reais	Female	Maria Helena Bellini	Medicina	Life Sciences
60-120 thousand Brazilian reais	Female	Iscia Teresinha Lopes Cendes	Medicina	Life Sciences
60-120 thousand Brazilian reais	Male	Claudio Guedes Salgado	Medicina	Life Sciences
60-120 thousand Brazilian reais	Male	Francisco Airton Castro da Rocha	Medicina	Life Sciences
60-120 thousand Brazilian reais	Male	Luis Augusto Paim Rohde	Medicina	Life Sciences
60-120 thousand Brazilian reais	Male	Clovis Artur Almeida da Silva	Medicina	Life Sciences
60-120 thousand Brazilian reais	Male	André Lopes Carvalho	Medicina	Life Sciences
60-120 thousand Brazilian reais	Male	Adhemar Longatto Filho	Medicina	Life Sciences
60-120 thousand Brazilian reais	Male	Flavio Pereira Kapczinski	Medicina	Life Sciences
60-120 thousand Brazilian reais	Male	Antonio Egidio Nardi	Medicina	Life Sciences
60-120 thousand Brazilian reais	Male	Carlos Roberto Brites Alves	Medicina	Life Sciences
60-120 thousand Brazilian reais	Male	Juarez Antônio Simões Quaresma	Medicina	Life Sciences
60-120 thousand Brazilian reais	Male	Niels Olsen Saraiva Câmara	Medicina	Life Sciences
60-120 thousand Brazilian reais	Male	Paulo Roberto Leitao de Vasconcelos	Medicina	Life Sciences
60-120 thousand Brazilian reais	Male	Licio Augusto Velloso	Medicina	Life Sciences
60-120 thousand Brazilian reais	Female	Vera Luiza Capelozzi	Medicina	Life Sciences
60-120 thousand Brazilian reais	Male	Fausto Foresti	Genética	Life Sciences
60-120 thousand Brazilian reais	Male	Roberto Giugliani	Genética	Life Sciences
60-120 thousand Brazilian reais	Female	Mara Helena Hutz	Genética	Life Sciences
60-120 thousand Brazilian reais	Male	Samuel Goldenberg	Genética	Life Sciences
60-120 thousand Brazilian reais	Male	Francisco Mauro Salzano	Genética	Life Sciences
60-120 thousand Brazilian reais	Male	Vasco Ariston de Carvalho Azevedo	Genética	Life Sciences
60-120 thousand Brazilian reais	Female	Silvia Regina Rogatto	Genética	Life Sciences
60-120 thousand Brazilian reais	Female	Izeni Pires Farias	Genética	Life Sciences
60-120 thousand Brazilian reais	Male	Alexandre Afranio Peixoto	Genética	Life Sciences
60-120 thousand Brazilian reais	Female	Lucymara Fassarella Agnez	Genética	Life Sciences
60-120 thousand Brazilian reais	Female	Silvia Helena Barem Rabenhorst	Genética	Life Sciences
60-120 thousand Brazilian reais	Female	Patricia Ashton Prolla	Genética	Life Sciences
60-120 thousand Brazilian reais	Male	Sergio Crovella	Genética	Life Sciences
60-120 thousand Brazilian reais	Female	Ieda Maria Orioli	Genética	Life Sciences
60-120 thousand Brazilian reais	Male	Marcio de Castro Silva Filho	Genética	Life Sciences
60-120 thousand Brazilian reais	Female	Elizabeth Pacheco Batista Fontes	Genética	Life Sciences
60-120 thousand Brazilian reais	Female	Maria Sueli Soares Felipe	Genética	Life Sciences
30-60 thousand Brazilian reais	Female	Ana Maria de Souza Mello Bicalho	Arquitetura, Demografia, Geografia	Humanities
30-60 thousand Brazilian reais	Female	Julia Adao Bernardes	Arquitetura, Demografia, Geografia	Humanities
30-60 thousand Brazilian reais	Male	Carlos Eduardo Dias Comas	Arquitetura, Demografia, Geografia	Humanities
30-60 thousand Brazilian reais	Female	Ana Luiza Coelho Netto	Arquitetura, Demografia, Geografia	Humanities
30-60 thousand Brazilian reais	Female	Elisabete Doria Bilac	Arquitetura, Demografia, Geografia	Humanities
30-60 thousand Brazilian reais	Female	Denise Morado Nascimento	Arquitetura, Demografia, Geografia	Humanities
30-60 thousand Brazilian reais	Male	Paulo Afonso Rheingantz	Arquitetura, Demografia, Geografia	Humanities
30-60 thousand Brazilian reais	Female	Norma Lacerda Gonçalves	Arquitetura, Demografia, Geografia	Humanities
30-60 thousand Brazilian reais	Male	Rainer Randolph	Arquitetura, Demografia, Geografia	Humanities
30-60 thousand Brazilian reais	Female	Rachel Coutinho Marques da Silva	Arquitetura, Demografia, Geografia	Humanities
30-60 thousand Brazilian reais	Female	Maria Tereza Duarte Paes	Arquitetura, Demografia, Geografia	Humanities
30-60 thousand Brazilian reais	Male	Bernardo Mançano Fernandes	Arquitetura, Demografia, Geografia	Humanities
30-60 thousand Brazilian reais	Female	Maria Elisa Zanella	Arquitetura, Demografia, Geografia	Humanities
30-60 thousand Brazilian reais	Male	Edvaldo Cesar Moretti	Arquitetura, Demografia, Geografia	Humanities
30-60 thousand Brazilian reais	Male	Maurílio de Abreu Monteiro	Arquitetura, Demografia, Geografia	Humanities
30-60 thousand Brazilian reais	Female	Suzana Marta Cavenaghi	Arquitetura, Demografia, Geografia	Humanities
30-60 thousand Brazilian reais	Female	Mônica Santos Salgado	Arquitetura, Demografia, Geografia	Humanities
30-60 thousand Brazilian reais	Female	Maisa Sales Gama Tobias	Arquitetura, Demografia, Geografia	Humanities
30-60 thousand Brazilian reais	Female	Elzira Lucia de Oliveira	Arquitetura, Demografia, Geografia	Humanities
30-60 thousand Brazilian reais	Male	Fernando Diniz Moreira	Arquitetura, Demografia, Geografia	Humanities
30-60 thousand Brazilian reais	Male	Luís Eduardo de Souza Robaina	Arquitetura, Demografia, Geografia	Humanities
30-60 thousand Brazilian reais	Male	Márcio Rogério Silveira	Arquitetura, Demografia, Geografia	Humanities
30-60 thousand Brazilian reais	Male	Nelson Vicente Lovatto Gasparetto	Arquitetura, Demografia, Geografia	Humanities
30-60 thousand Brazilian reais	Male	Edivaldo Lopes Thomaz	Arquitetura, Demografia, Geografia	Humanities
30-60 thousand Brazilian reais	Female	Denise de Souza Elias	Arquitetura, Demografia, Geografia	Humanities
30-60 thousand Brazilian reais	Female	Lidriana de Souza Pinheiro	Arquitetura, Demografia, Geografia	Humanities
30-60 thousand Brazilian reais	Male	Carlos Walter Porto-Gonçalves	Arquitetura, Demografia, Geografia	Humanities
30-60 thousand Brazilian reais	Female	Inês Barbosa de Oliveira	Educação	Humanities
30-60 thousand Brazilian reais	Male	Eduardo Fleury Mortimer	Educação	Humanities
30-60 thousand Brazilian reais	Female	Betania Leite Ramalho	Educação	Humanities
30-60 thousand Brazilian reais	Male	Luiz Marcelo de Carvalho	Educação	Humanities
30-60 thousand Brazilian reais	Male	Luciano Mendes de Faria Filho	Educação	Humanities
30-60 thousand Brazilian reais	Male	José Gonçalves Gondra	Educação	Humanities
30-60 thousand Brazilian reais	Female	Mariluce Bittar	Educação	Humanities
30-60 thousand Brazilian reais	Female	Sonia Maria Rummert	Educação	Humanities
30-60 thousand Brazilian reais	Female	Paula Regina Costa Ribeiro	Educação	Humanities
30-60 thousand Brazilian reais	Female	Edla Eggert	Educação	Humanities
30-60 thousand Brazilian reais	Male	Jose Claudinei Lombardi	Educação	Humanities
30-60 thousand Brazilian reais	Female	Joana Paulin Romanowski	Educação	Humanities
30-60 thousand Brazilian reais	Female	Ana Paula Bispo da Silva	Educação	Humanities
30-60 thousand Brazilian reais	Female	Alice Ribeiro Casimiro Lopes	Educação	Humanities
30-60 thousand Brazilian reais	Female	Aracy Alves Martins	Educação	Humanities
30-60 thousand Brazilian reais	Female	Terezinha Valim Oliver Gonçalves	Educação	Humanities
30-60 thousand Brazilian reais	Female	Lourdes Helena da Silva	Educação	Humanities
30-60 thousand Brazilian reais	Female	Nilma Lino Gomes	Educação	Humanities
30-60 thousand Brazilian reais	Female	Cláudia Regina Flores	Educação	Humanities
30-60 thousand Brazilian reais	Female	Liliana Maria Passerino	Educação	Humanities
30-60 thousand Brazilian reais	Female	Lisete Regina Gomes Arelaro	Educação	Humanities
30-60 thousand Brazilian reais	Male	Danilo Romeu Streck	Educação	Humanities
30-60 thousand Brazilian reais	Male	Jorge Megid Neto	Educação	Humanities
30-60 thousand Brazilian reais	Male	Cristiano Rodrigues de Mattos	Educação	Humanities
30-60 thousand Brazilian reais	Female	Guaracira Gouvêa de Sousa	Educação	Humanities
30-60 thousand Brazilian reais	Female	Rosana Maria Gemaque Rolim	Educação	Humanities
30-60 thousand Brazilian reais	Female	Tânia Maria Figueiredo Braga Garcia	Educação	Humanities
30-60 thousand Brazilian reais	Female	Rosemary Dore Heijmans	Educação	Humanities
30-60 thousand Brazilian reais	Female	Elizabeth Fernandes de Macedo	Educação	Humanities
30-60 thousand Brazilian reais	Male	Marcus Levy Albino Bencostta	Educação	Humanities
30-60 thousand Brazilian reais	Female	Ana Maria Fontenelle Catrib	Educação	Humanities
30-60 thousand Brazilian reais	Female	Marilia Costa Morosini	Educação	Humanities
30-60 thousand Brazilian reais	Female	Rita de Cássia da Silva Oliveira	Educação	Humanities
30-60 thousand Brazilian reais	Female	Maura Corcini Lopes	Educação	Humanities
30-60 thousand Brazilian reais	Male	Emmanuel Ribeiro Cunha	Educação	Humanities
30-60 thousand Brazilian reais	Female	Regina Aparecida da Silva	Educação	Humanities
30-60 thousand Brazilian reais	Male	Antonio Jorge Goncalves Soares	Educação	Humanities
30-60 thousand Brazilian reais	Female	Maria Virgínia Machado Dazzani	Educação	Humanities
30-60 thousand Brazilian reais	Male	Jose Eugenio Leal	Engenharia de Produção e de Transportes	Exact Sciences
30-60 thousand Brazilian reais	Male	Elton Fernandes	Engenharia de Produção e de Transportes	Exact Sciences
30-60 thousand Brazilian reais	Male	Paulo Cezar Martins Ribeiro	Engenharia de Produção e de Transportes	Exact Sciences
30-60 thousand Brazilian reais	Male	Plácido Rogério Pinheiro	Engenharia de Produção e de Transportes	Exact Sciences
30-60 thousand Brazilian reais	Male	Li Weigang	Engenharia de Produção e de Transportes	Exact Sciences
30-60 thousand Brazilian reais	Male	Flavio Jose Craveiro Cunto	Engenharia de Produção e de Transportes	Exact Sciences
30-60 thousand Brazilian reais	Male	José Alberto Quintanilha	Engenharia de Produção e de Transportes	Exact Sciences
30-60 thousand Brazilian reais	Male	Tarcisio Abreu Saurin	Engenharia de Produção e de Transportes	Exact Sciences
30-60 thousand Brazilian reais	Male	Daniel Aloise	Engenharia de Produção e de Transportes	Exact Sciences
30-60 thousand Brazilian reais	Male	Martín Gómez Ravetti	Engenharia de Produção e de Transportes	Exact Sciences
30-60 thousand Brazilian reais	Male	Paulo Victor Rodrigues de Carvalho	Engenharia de Produção e de Transportes	Exact Sciences
30-60 thousand Brazilian reais	Male	Aurelio Ribeiro Leite de Oliveira	Engenharia de Produção e de Transportes	Exact Sciences
30-60 thousand Brazilian reais	Female	Maria do Carmo Learth Cunha	Recursos Florestais	Exact Sciences
30-60 thousand Brazilian reais	Male	Geraldo Gonçalves dos Reis	Recursos Florestais	Exact Sciences
30-60 thousand Brazilian reais	Male	Fábio de Almeida Vieira	Recursos Florestais	Exact Sciences
30-60 thousand Brazilian reais	Male	Mario Tomazello Filho	Recursos Florestais	Exact Sciences
30-60 thousand Brazilian reais	Male	Álvaro Figueredo dos Santos	Recursos Florestais	Exact Sciences
30-60 thousand Brazilian reais	Female	Izildinha de Souza Miranda	Recursos Florestais	Exact Sciences
30-60 thousand Brazilian reais	Female	Maria Bernadete Lovato	Recursos Florestais	Exact Sciences
30-60 thousand Brazilian reais	Female	Rosa Helena Veras Mourão	Recursos Florestais	Exact Sciences
30-60 thousand Brazilian reais	Male	Elias Melo de Miranda	Recursos Florestais	Exact Sciences
30-60 thousand Brazilian reais	Female	Cristiane Pedrazzi	Recursos Florestais	Exact Sciences
30-60 thousand Brazilian reais	Female	Lucia Helena de Oliveira Wadt	Recursos Florestais	Exact Sciences
30-60 thousand Brazilian reais	Female	Ana Marcia Macedo Ladeira Carvalho	Recursos Florestais	Exact Sciences
30-60 thousand Brazilian reais	Male	Alexandre Floriani Ramos	Medicina Veterinária	Life Sciences
30-60 thousand Brazilian reais	Male	Carlos Luiz Massard	Medicina Veterinária	Life Sciences
30-60 thousand Brazilian reais	Female	Cleuza Maria de Faria Rezende	Medicina Veterinária	Life Sciences
30-60 thousand Brazilian reais	Female	Clarice Weis Arns	Medicina Veterinária	Life Sciences
30-60 thousand Brazilian reais	Male	Nelson Rodrigo da Silva Martins	Medicina Veterinária	Life Sciences
30-60 thousand Brazilian reais	Male	Francisco Carlos Faria Lobato	Medicina Veterinária	Life Sciences
30-60 thousand Brazilian reais	Male	Sergio Borges Mano	Medicina Veterinária	Life Sciences
30-60 thousand Brazilian reais	Female	Marcia Dalastra Laurenti	Medicina Veterinária	Life Sciences
30-60 thousand Brazilian reais	Female	Agueda Palmira Castagna de Vargas	Medicina Veterinária	Life Sciences
30-60 thousand Brazilian reais	Male	Wagner Luiz Tafuri	Medicina Veterinária	Life Sciences
30-60 thousand Brazilian reais	Male	Mario Carlos Araujo Meireles	Medicina Veterinária	Life Sciences
30-60 thousand Brazilian reais	Male	Francisco Assis Lima Costa	Medicina Veterinária	Life Sciences
30-60 thousand Brazilian reais	Male	Walter Lilenbaum	Medicina Veterinária	Life Sciences
30-60 thousand Brazilian reais	Male	Ricardo Antônio Amaral de Lemos	Medicina Veterinária	Life Sciences
30-60 thousand Brazilian reais	Male	David Driemeier	Medicina Veterinária	Life Sciences
30-60 thousand Brazilian reais	Male	Fabricio Rochedo Conceição	Medicina Veterinária	Life Sciences
30-60 thousand Brazilian reais	Male	José Buratini Junior	Medicina Veterinária	Life Sciences
30-60 thousand Brazilian reais	Female	Hilda Fátima de Jesus Pena	Medicina Veterinária	Life Sciences
30-60 thousand Brazilian reais	Female	Lúcia Daniel Machado da Silva	Medicina Veterinária	Life Sciences
30-60 thousand Brazilian reais	Male	Fernando Rosado Spilki	Medicina Veterinária	Life Sciences
30-60 thousand Brazilian reais	Male	Álan Maia Borges	Medicina Veterinária	Life Sciences
30-60 thousand Brazilian reais	Female	Maria Fátima da Silva Teixeira	Medicina Veterinária	Life Sciences
30-60 thousand Brazilian reais	Female	Viviane Mayumi Maruo	Medicina Veterinária	Life Sciences
30-60 thousand Brazilian reais	Male	Mario Binelli	Medicina Veterinária	Life Sciences
30-60 thousand Brazilian reais	Male	Renato de Lima Santos	Medicina Veterinária	Life Sciences
30-60 thousand Brazilian reais	Male	Maurício Veloso Brun	Medicina Veterinária	Life Sciences
30-60 thousand Brazilian reais	Male	Vitor Salvador Picão Gonçalves	Medicina Veterinária	Life Sciences
30-60 thousand Brazilian reais	Female	Marisa Ribeiro de Itapema Cardoso	Medicina Veterinária	Life Sciences
30-60 thousand Brazilian reais	Male	Valdemiro Amaro da Silva Junior	Medicina Veterinária	Life Sciences
30-60 thousand Brazilian reais	Male	Walter dos Santos Lima	Medicina Veterinária	Life Sciences
30-60 thousand Brazilian reais	Male	Alexandre Secorun Borges	Medicina Veterinária	Life Sciences
30-60 thousand Brazilian reais	Male	Marcelo Marcondes Seneda	Medicina Veterinária	Life Sciences
30-60 thousand Brazilian reais	Male	Geraldo Tadeu dos Santos	Zootecnia	Life Sciences
30-60 thousand Brazilian reais	Male	Adibe Luiz Abdalla	Zootecnia	Life Sciences
30-60 thousand Brazilian reais	Male	Rasmo Garcia	Zootecnia	Life Sciences
30-60 thousand Brazilian reais	Male	Pedro Braga Arcuri	Zootecnia	Life Sciences
30-60 thousand Brazilian reais	Male	Arlindo de Alencar Araripe Noronha Moura	Zootecnia	Life Sciences
30-60 thousand Brazilian reais	Female	Eloisa de Oliveira Simões Saliba	Zootecnia	Life Sciences
30-60 thousand Brazilian reais	Male	Francisco de Assis Fonseca de Macedo	Zootecnia	Life Sciences
30-60 thousand Brazilian reais	Male	Flávio Dutra de Resende	Zootecnia	Life Sciences
30-60 thousand Brazilian reais	Male	Antonio Ferriani Branco	Zootecnia	Life Sciences
30-60 thousand Brazilian reais	Male	Clóves Cabreira Jobim	Zootecnia	Life Sciences
30-60 thousand Brazilian reais	Female	Lucia Maria Zeoula	Zootecnia	Life Sciences
30-60 thousand Brazilian reais	Female	Adriana Guim	Zootecnia	Life Sciences
30-60 thousand Brazilian reais	Male	Gilberto Vilmar Kozloski	Zootecnia	Life Sciences
30-60 thousand Brazilian reais	Male	Sergio Raposo de Medeiros	Zootecnia	Life Sciences
30-60 thousand Brazilian reais	Male	Alexandre Carneiro Leão de Mello	Zootecnia	Life Sciences
30-60 thousand Brazilian reais	Male	José Lindenberg Rocha Sarmento	Zootecnia	Life Sciences
30-60 thousand Brazilian reais	Male	Gerson Barreto Mourão	Zootecnia	Life Sciences
30-60 thousand Brazilian reais	Female	Eliane Gasparino	Zootecnia	Life Sciences
30-60 thousand Brazilian reais	Male	Mario Luiz Chizzotti	Zootecnia	Life Sciences
30-60 thousand Brazilian reais	Male	Ulysses Cecato	Zootecnia	Life Sciences
30-60 thousand Brazilian reais	Male	Patrick Schmidt	Zootecnia	Life Sciences
30-60 thousand Brazilian reais	Male	Ricardo Andrade Reis	Zootecnia	Life Sciences
30-60 thousand Brazilian reais	Female	Ana Luiza Costa Cruz Borges	Zootecnia	Life Sciences
30-60 thousand Brazilian reais	Female	Rosemary Laís Galati	Zootecnia	Life Sciences
30-60 thousand Brazilian reais	Male	Maykel Franklin Lima Sales	Zootecnia	Life Sciences
30-60 thousand Brazilian reais	Male	Airon Aparecido Silva de Melo	Zootecnia	Life Sciences
30-60 thousand Brazilian reais	Male	Magno José Duarte Cândido	Zootecnia	Life Sciences
30-60 thousand Brazilian reais	Male	Emerson Alexandrino	Zootecnia	Life Sciences
30-60 thousand Brazilian reais	Male	Idalmo Garcia Pereira	Zootecnia	Life Sciences
30-60 thousand Brazilian reais	Male	Ednardo Rodrigues Freitas	Zootecnia	Life Sciences
30-60 thousand Brazilian reais	Male	André Soares de Oliveira	Zootecnia	Life Sciences
30-60 thousand Brazilian reais	Male	André Mendes Jorge	Zootecnia	Life Sciences
30-60 thousand Brazilian reais	Male	Gleidson Giordano Pinto de Carvalho	Zootecnia	Life Sciences
30-60 thousand Brazilian reais	Male	Enéas Gomes Filho	Botânica	Life Sciences
30-60 thousand Brazilian reais	Female	Ortrud Monika Barth Schatzmayr	Botânica	Life Sciences
30-60 thousand Brazilian reais	Male	Luiz Antonio de Souza	Botânica	Life Sciences
30-60 thousand Brazilian reais	Male	João Renato Stehmann	Botânica	Life Sciences
30-60 thousand Brazilian reais	Male	Arthur Germano Fett Neto	Botânica	Life Sciences
30-60 thousand Brazilian reais	Male	Iuri Goulart Baseia	Botânica	Life Sciences
30-60 thousand Brazilian reais	Female	Maura da Cunha	Botânica	Life Sciences
30-60 thousand Brazilian reais	Female	Veronica Angyalossy	Botânica	Life Sciences
30-60 thousand Brazilian reais	Female	Tatiana Teixeira de Souza Chies	Botânica	Life Sciences
30-60 thousand Brazilian reais	Female	Ilka Maria Vasconcelos	Botânica	Life Sciences
30-60 thousand Brazilian reais	Male	Wagner Luiz Araujo	Botânica	Life Sciences
30-60 thousand Brazilian reais	Male	Nivaldo Peroni	Botânica	Life Sciences
30-60 thousand Brazilian reais	Male	Luis Fernando Tavares de Menezes	Botânica	Life Sciences
30-60 thousand Brazilian reais	Male	Milton Luiz Laquintinie Formoso	Geociências	Exact Sciences
30-60 thousand Brazilian reais	Male	Marcondes Lima da Costa	Geociências	Exact Sciences
30-60 thousand Brazilian reais	Female	Margot Guerra Sommer	Geociências	Exact Sciences
30-60 thousand Brazilian reais	Male	Elson Paiva de Oliveira	Geociências	Exact Sciences
30-60 thousand Brazilian reais	Female	Maria Isabel Castreghini de Freitas	Geociências	Exact Sciences
30-60 thousand Brazilian reais	Male	Paulo Roberto Antunes Aranha	Geociências	Exact Sciences
30-60 thousand Brazilian reais	Female	Susy Eli Marques Gouveia	Geociências	Exact Sciences
30-60 thousand Brazilian reais	Male	Artur Cezar Bastos Neto	Geociências	Exact Sciences
30-60 thousand Brazilian reais	Female	Ana Maria Ribeiro	Geociências	Exact Sciences
30-60 thousand Brazilian reais	Female	Adriana Maria Coimbra Horbe	Geociências	Exact Sciences
30-60 thousand Brazilian reais	Male	César Peixoto da Rocha	Geociências	Exact Sciences
30-60 thousand Brazilian reais	Male	Leonardo Cardoso Renner	Geociências	Exact Sciences
30-60 thousand Brazilian reais	Male	João Carlos Salles Pires da Silva	Filosofia	Humanities
30-60 thousand Brazilian reais	Female	Sofia Inês Albornoz Stein	Filosofia	Humanities
30-60 thousand Brazilian reais	Male	Lucas Angioni	Filosofia	Humanities
30-60 thousand Brazilian reais	Male	Róbson Ramos dos Reis	Filosofia	Humanities
30-60 thousand Brazilian reais	Male	Luís Henrique Dreher	Filosofia	Humanities
30-60 thousand Brazilian reais	Male	Orlando Francisco Amodeo Bueno	Psicologia e Serviço Social	Humanities
30-60 thousand Brazilian reais	Male	Cesar Augusto Piccinini	Psicologia e Serviço Social	Humanities
30-60 thousand Brazilian reais	Female	Emma Otta	Psicologia e Serviço Social	Humanities
30-60 thousand Brazilian reais	Female	Maria Juracy Filgueiras Toneli	Psicologia e Serviço Social	Humanities
30-60 thousand Brazilian reais	Female	Rita de Cassia Sobreira Lopes	Psicologia e Serviço Social	Humanities
30-60 thousand Brazilian reais	Male	Jesus Landeira-Fernandez	Psicologia e Serviço Social	Humanities
30-60 thousand Brazilian reais	Female	Terezinha Féres-Carneiro	Psicologia e Serviço Social	Humanities
30-60 thousand Brazilian reais	Male	Antonio Virgilio Bittencourt Bastos	Psicologia e Serviço Social	Humanities
30-60 thousand Brazilian reais	Female	Claudia Cardoso Martins	Psicologia e Serviço Social	Humanities
30-60 thousand Brazilian reais	Female	Ana María Jacó Vilela	Psicologia e Serviço Social	Humanities
30-60 thousand Brazilian reais	Male	Ricardo Primi	Psicologia e Serviço Social	Humanities
30-60 thousand Brazilian reais	Male	Gilberto Fernando Xavier	Psicologia e Serviço Social	Humanities
30-60 thousand Brazilian reais	Male	Valdiney Veloso Gouveia	Psicologia e Serviço Social	Humanities
30-60 thousand Brazilian reais	Female	Angela Maria Resende Vorcaro	Psicologia e Serviço Social	Humanities
30-60 thousand Brazilian reais	Female	Daniela Centenaro Levandowski	Psicologia e Serviço Social	Humanities
30-60 thousand Brazilian reais	Male	Henrique Caetano Nardi	Psicologia e Serviço Social	Humanities
30-60 thousand Brazilian reais	Female	Vera Maria Ribeiro Nogueira	Psicologia e Serviço Social	Humanities
30-60 thousand Brazilian reais	Male	Paulo Sérgio Boggio	Psicologia e Serviço Social	Humanities
30-60 thousand Brazilian reais	Female	Edwiges Ferreira de Mattos Silvares	Psicologia e Serviço Social	Humanities
30-60 thousand Brazilian reais	Female	Deise Matos do Amparo	Psicologia e Serviço Social	Humanities
30-60 thousand Brazilian reais	Female	Rosa Maria Martins de Almeida	Psicologia e Serviço Social	Humanities
30-60 thousand Brazilian reais	Female	Lucia de Fatima Almeida de Deus Moura	Odontologia	Life Sciences
30-60 thousand Brazilian reais	Male	Adalberto Luiz Rosa	Odontologia	Life Sciences
30-60 thousand Brazilian reais	Female	Eneida Franco Vencio	Odontologia	Life Sciences
30-60 thousand Brazilian reais	Male	Carlos Estrela	Odontologia	Life Sciences
30-60 thousand Brazilian reais	Male	Ricardo Santiago Gomez	Odontologia	Life Sciences
30-60 thousand Brazilian reais	Male	Ricardo de Lima Navarro	Odontologia	Life Sciences
30-60 thousand Brazilian reais	Female	Ana Paula Negreiros Nunes Alves	Odontologia	Life Sciences
30-60 thousand Brazilian reais	Female	Naila Francis Paulo de Oliveira	Odontologia	Life Sciences
30-60 thousand Brazilian reais	Male	Paulo Frazão	Odontologia	Life Sciences
30-60 thousand Brazilian reais	Male	Alfredo Maurício Batista de Paula	Odontologia	Life Sciences
30-60 thousand Brazilian reais	Male	Maximiliano Sérgio Cenci	Odontologia	Life Sciences
30-60 thousand Brazilian reais	Male	Eduardo Moreira da Silva	Odontologia	Life Sciences
30-60 thousand Brazilian reais	Male	Willian Fernando Zambuzzi	Odontologia	Life Sciences
30-60 thousand Brazilian reais	Female	Taia Maria Berto Rezende	Odontologia	Life Sciences
30-60 thousand Brazilian reais	Female	Camila Fávero de Oliveira	Odontologia	Life Sciences
30-60 thousand Brazilian reais	Female	Tarcília Aparecida da Silva	Odontologia	Life Sciences
30-60 thousand Brazilian reais	Male	Francisco Humberto Nociti Junior	Odontologia	Life Sciences
30-60 thousand Brazilian reais	Male	Rodrigo Arantes Reis	Divulgação Científica	Humanities
30-60 thousand Brazilian reais	Female	Narcisa Leal da Cunha-e-Silva	Morfologia	Life Sciences
30-60 thousand Brazilian reais	Male	Marcos Farina de Souza	Morfologia	Life Sciences
30-60 thousand Brazilian reais	Male	Alfredo Miranda de Goes	Morfologia	Life Sciences
30-60 thousand Brazilian reais	Male	Luiz Eurico Nasciutti	Morfologia	Life Sciences
30-60 thousand Brazilian reais	Male	Roger Chammas	Morfologia	Life Sciences
30-60 thousand Brazilian reais	Female	Andrea Goncalves Trentin	Morfologia	Life Sciences
30-60 thousand Brazilian reais	Male	Walace Gomes Leal	Morfologia	Life Sciences
30-60 thousand Brazilian reais	Female	Fernanda Cristina Alcantara dos Santos	Morfologia	Life Sciences
30-60 thousand Brazilian reais	Male	Pedro Marcos Gomes Soares	Morfologia	Life Sciences
30-60 thousand Brazilian reais	Female	Sandra Lopes de Souza	Morfologia	Life Sciences
30-60 thousand Brazilian reais	Male	Álvaro Aguiar Coelho Teixeira	Morfologia	Life Sciences
30-60 thousand Brazilian reais	Male	Reinaldo Barreto Oriá	Morfologia	Life Sciences
30-60 thousand Brazilian reais	Female	Ana Maria Blanco Martinez	Morfologia	Life Sciences
30-60 thousand Brazilian reais	Female	Eloisa Amália Vieira Ferro	Morfologia	Life Sciences
30-60 thousand Brazilian reais	Male	Stevens Kastrup Rehen	Morfologia	Life Sciences
30-60 thousand Brazilian reais	Male	Cristovam Wanderley Picanço Diniz	Morfologia	Life Sciences
30-60 thousand Brazilian reais	Female	Flavia Carvalho Alcantara Gomes	Morfologia	Life Sciences
30-60 thousand Brazilian reais	Male	Antônio Pereira Júnior	Morfologia	Life Sciences
30-60 thousand Brazilian reais	Female	Evanilde Benedito	Ecologia e Limnologia	Life Sciences
30-60 thousand Brazilian reais	Female	Claudia Maria Jacobi	Ecologia e Limnologia	Life Sciences
30-60 thousand Brazilian reais	Male	José Lailson Brito Junior	Ecologia e Limnologia	Life Sciences
30-60 thousand Brazilian reais	Male	Vinícius Abilhoa	Ecologia e Limnologia	Life Sciences
30-60 thousand Brazilian reais	Male	Paulo De Marco Júnior	Ecologia e Limnologia	Life Sciences
30-60 thousand Brazilian reais	Male	Emerson Monteiro Vieira	Ecologia e Limnologia	Life Sciences
30-60 thousand Brazilian reais	Male	Kleber Del Claro	Ecologia e Limnologia	Life Sciences
30-60 thousand Brazilian reais	Female	Flávia Regina Capellotto Costa	Ecologia e Limnologia	Life Sciences
30-60 thousand Brazilian reais	Male	Heraldo Luis de Vasconcelos	Ecologia e Limnologia	Life Sciences
30-60 thousand Brazilian reais	Male	Thiago Junqueira Izzo	Ecologia e Limnologia	Life Sciences
30-60 thousand Brazilian reais	Female	Sheyla Regina Marques Couceiro	Ecologia e Limnologia	Life Sciences
30-60 thousand Brazilian reais	Male	Marcio Roberto Pie	Ecologia e Limnologia	Life Sciences
30-60 thousand Brazilian reais	Male	Marcus Vinicius Cianciaruso	Ecologia e Limnologia	Life Sciences
30-60 thousand Brazilian reais	Male	Luís Felipe de Toledo Ramos Pereira	Ecologia e Limnologia	Life Sciences
30-60 thousand Brazilian reais	Female	Sandra Maria Feliciano de Oliveira e Azevedo	Ecologia e Limnologia	Life Sciences
30-60 thousand Brazilian reais	Male	Jean Carlos Santos	Ecologia e Limnologia	Life Sciences
30-60 thousand Brazilian reais	Male	Carlos Frederico Duarte da Rocha	Ecologia e Limnologia	Life Sciences
30-60 thousand Brazilian reais	Male	Fernando Antonio dos Santos Fernandez	Ecologia e Limnologia	Life Sciences
30-60 thousand Brazilian reais	Female	Regina Borges de Araujo	Ciências da Computação	Exact Sciences
30-60 thousand Brazilian reais	Male	Rômulo Silva de Oliveira	Ciências da Computação	Exact Sciences
30-60 thousand Brazilian reais	Male	Marcelo Knörich Zuffo	Ciências da Computação	Exact Sciences
30-60 thousand Brazilian reais	Male	Mário Fernando Montenegro Campos	Ciências da Computação	Exact Sciences
30-60 thousand Brazilian reais	Male	Luiz Carlos Pacheco Rodrigues Velho	Ciências da Computação	Exact Sciences
30-60 thousand Brazilian reais	Female	Cecília Mary Fischer Rubira	Ciências da Computação	Exact Sciences
30-60 thousand Brazilian reais	Female	Leila Ribeiro	Ciências da Computação	Exact Sciences
30-60 thousand Brazilian reais	Male	Joao Luiz Dihl Comba	Ciências da Computação	Exact Sciences
30-60 thousand Brazilian reais	Male	Djamel Fawzi Hadj Sadok	Ciências da Computação	Exact Sciences
30-60 thousand Brazilian reais	Female	Roseli Aparecida Francelin Romero	Ciências da Computação	Exact Sciences
30-60 thousand Brazilian reais	Male	Carlos Alberto Kamienski	Ciências da Computação	Exact Sciences
30-60 thousand Brazilian reais	Male	Marcio Merino Fernandes	Ciências da Computação	Exact Sciences
30-60 thousand Brazilian reais	Male	Sergio Castelo Branco Soares	Ciências da Computação	Exact Sciences
30-60 thousand Brazilian reais	Female	Jonice de Oliveira Sampaio	Ciências da Computação	Exact Sciences
30-60 thousand Brazilian reais	Male	Jacir Luiz Bordim	Ciências da Computação	Exact Sciences
30-60 thousand Brazilian reais	Female	Célia Aparecida Zorzo Barcelos	Ciências da Computação	Exact Sciences
30-60 thousand Brazilian reais	Female	Sandra Aparecida Sandri	Ciências da Computação	Exact Sciences
30-60 thousand Brazilian reais	Male	Ricardo da Silva Torres	Ciências da Computação	Exact Sciences
30-60 thousand Brazilian reais	Male	Stênio Flávio de Lacerda Fernandes	Ciências da Computação	Exact Sciences
30-60 thousand Brazilian reais	Male	Edward David Moreno Ordonez	Ciências da Computação	Exact Sciences
30-60 thousand Brazilian reais	Male	Edson Prestes e Silva Júnior	Ciências da Computação	Exact Sciences
30-60 thousand Brazilian reais	Male	Marco Antônio Pinheiro de Cristo	Ciências da Computação	Exact Sciences
30-60 thousand Brazilian reais	Male	José Palazzo Moreira de Oliveira	Ciências da Computação	Exact Sciences
30-60 thousand Brazilian reais	Male	Alexandre Carlos Brandao Ramos	Ciências da Computação	Exact Sciences
30-60 thousand Brazilian reais	Male	Arnaldo de Albuquerque Araújo	Ciências da Computação	Exact Sciences
30-60 thousand Brazilian reais	Female	Carmen Silvia Rial	Antrop., Arqueol., C. Política, Direito, Rel. Internacionais e Sociologia	Humanities
30-60 thousand Brazilian reais	Male	Eduardo Rodrigues Gomes	Antrop., Arqueol., C. Política, Direito, Rel. Internacionais e Sociologia	Humanities
30-60 thousand Brazilian reais	Female	Monica Herz	Antrop., Arqueol., C. Política, Direito, Rel. Internacionais e Sociologia	Humanities
30-60 thousand Brazilian reais	Male	Roberto Kant de Lima	Antrop., Arqueol., C. Política, Direito, Rel. Internacionais e Sociologia	Humanities
30-60 thousand Brazilian reais	Male	Jose Luís dos Santos Peixoto	Antrop., Arqueol., C. Política, Direito, Rel. Internacionais e Sociologia	Humanities
30-60 thousand Brazilian reais	Male	Ademir Antonio Cazella	Antrop., Arqueol., C. Política, Direito, Rel. Internacionais e Sociologia	Humanities
30-60 thousand Brazilian reais	Female	Glaucia Kruse Villas Bôas	Antrop., Arqueol., C. Política, Direito, Rel. Internacionais e Sociologia	Humanities
30-60 thousand Brazilian reais	Male	Paulo Henrique Novaes Martins de Albuquerque	Antrop., Arqueol., C. Política, Direito, Rel. Internacionais e Sociologia	Humanities
30-60 thousand Brazilian reais	Female	Cecilia Caballero Lois	Antrop., Arqueol., C. Política, Direito, Rel. Internacionais e Sociologia	Humanities
30-60 thousand Brazilian reais	Male	José Maurício Paiva Andion Arruti	Antrop., Arqueol., C. Política, Direito, Rel. Internacionais e Sociologia	Humanities
30-60 thousand Brazilian reais	Male	Carlos Frederico Mares de Souza Filho	Antrop., Arqueol., C. Política, Direito, Rel. Internacionais e Sociologia	Humanities
30-60 thousand Brazilian reais	Female	Francilene dos Santos Rodrigues	Antrop., Arqueol., C. Política, Direito, Rel. Internacionais e Sociologia	Humanities
30-60 thousand Brazilian reais	Male	Andrei Isnardis Horta	Antrop., Arqueol., C. Política, Direito, Rel. Internacionais e Sociologia	Humanities
30-60 thousand Brazilian reais	Male	Fernando Antonio de Carvalho Dantas	Antrop., Arqueol., C. Política, Direito, Rel. Internacionais e Sociologia	Humanities
30-60 thousand Brazilian reais	Female	Maria da Gloria Bonelli	Antrop., Arqueol., C. Política, Direito, Rel. Internacionais e Sociologia	Humanities
30-60 thousand Brazilian reais	Female	Dalva Maria da Mota	Antrop., Arqueol., C. Política, Direito, Rel. Internacionais e Sociologia	Humanities
30-60 thousand Brazilian reais	Male	Carlos Xavier de Azevedo Netto	Antrop., Arqueol., C. Política, Direito, Rel. Internacionais e Sociologia	Humanities
30-60 thousand Brazilian reais	Male	Fernando de Barros Filgueiras	Antrop., Arqueol., C. Política, Direito, Rel. Internacionais e Sociologia	Humanities
30-60 thousand Brazilian reais	Male	Marcelo Carvalho Rosa	Antrop., Arqueol., C. Política, Direito, Rel. Internacionais e Sociologia	Humanities
30-60 thousand Brazilian reais	Female	Monique Menezes	Antrop., Arqueol., C. Política, Direito, Rel. Internacionais e Sociologia	Humanities
30-60 thousand Brazilian reais	Female	Anete Brito Leal Ivo	Antrop., Arqueol., C. Política, Direito, Rel. Internacionais e Sociologia	Humanities
30-60 thousand Brazilian reais	Male	Alexandre Fernandes Corrêa	Antrop., Arqueol., C. Política, Direito, Rel. Internacionais e Sociologia	Humanities
30-60 thousand Brazilian reais	Female	Celuta Sales Alviano	Microbiologia e Parasitologia	Life Sciences
30-60 thousand Brazilian reais	Female	Sirlei Daffre	Microbiologia e Parasitologia	Life Sciences
30-60 thousand Brazilian reais	Female	Alane Beatriz Vermelho	Microbiologia e Parasitologia	Life Sciences
30-60 thousand Brazilian reais	Female	Mariane Martins de Araújo Stefani	Microbiologia e Parasitologia	Life Sciences
30-60 thousand Brazilian reais	Male	Jose Osvaldo Previato	Microbiologia e Parasitologia	Life Sciences
30-60 thousand Brazilian reais	Female	Ildinete Silva Pereira	Microbiologia e Parasitologia	Life Sciences
30-60 thousand Brazilian reais	Female	Regina Maria Cavalcanti Pilotto Domingues	Microbiologia e Parasitologia	Life Sciences
30-60 thousand Brazilian reais	Female	Beatriz Ernestina Cabilio Guth	Microbiologia e Parasitologia	Life Sciences
30-60 thousand Brazilian reais	Female	Tania Aparecida Tardelli Gomes do Amaral	Microbiologia e Parasitologia	Life Sciences
30-60 thousand Brazilian reais	Female	Georgia Correa Atella	Microbiologia e Parasitologia	Life Sciences
30-60 thousand Brazilian reais	Male	João Carlos Pinto Dias	Microbiologia e Parasitologia	Life Sciences
30-60 thousand Brazilian reais	Female	Silvia Reni Bortolin Uliana	Microbiologia e Parasitologia	Life Sciences
30-60 thousand Brazilian reais	Male	Victor Hugo Aquino Quintana	Microbiologia e Parasitologia	Life Sciences
30-60 thousand Brazilian reais	Male	Marcelo Urbano Ferreira	Microbiologia e Parasitologia	Life Sciences
30-60 thousand Brazilian reais	Female	Maria Cristina Maciel Plotkowski	Microbiologia e Parasitologia	Life Sciences
30-60 thousand Brazilian reais	Male	Marcio Lourenço Rodrigues	Microbiologia e Parasitologia	Life Sciences
30-60 thousand Brazilian reais	Male	Carlos Pelleschi Taborda	Microbiologia e Parasitologia	Life Sciences
30-60 thousand Brazilian reais	Male	Galdino Andrade Filho	Microbiologia e Parasitologia	Life Sciences
30-60 thousand Brazilian reais	Female	Érika Martins Braga	Microbiologia e Parasitologia	Life Sciences
30-60 thousand Brazilian reais	Female	Maria Helena Neves Lobo Silva Filha	Microbiologia e Parasitologia	Life Sciences
30-60 thousand Brazilian reais	Male	Paulo Marcos da Matta Guedes	Microbiologia e Parasitologia	Life Sciences
30-60 thousand Brazilian reais	Female	Patricia Sampaio Tavares Veras	Microbiologia e Parasitologia	Life Sciences
30-60 thousand Brazilian reais	Male	Flávio Guimarães da Fonseca	Microbiologia e Parasitologia	Life Sciences
30-60 thousand Brazilian reais	Male	André Luis Souza dos Santos	Microbiologia e Parasitologia	Life Sciences
30-60 thousand Brazilian reais	Male	Maurício Lacerda Nogueira	Microbiologia e Parasitologia	Life Sciences
30-60 thousand Brazilian reais	Male	Afonso Luís Barth	Microbiologia e Parasitologia	Life Sciences
30-60 thousand Brazilian reais	Female	Elisa Cupolillo	Microbiologia e Parasitologia	Life Sciences
30-60 thousand Brazilian reais	Female	Julia Maria Costa-Cruz	Microbiologia e Parasitologia	Life Sciences
30-60 thousand Brazilian reais	Male	Valter Ferreira de Andrade Neto	Microbiologia e Parasitologia	Life Sciences
30-60 thousand Brazilian reais	Male	Marcio Roberto Teixeira Nunes	Microbiologia e Parasitologia	Life Sciences
30-60 thousand Brazilian reais	Male	Luiz de Macêdo Farias	Microbiologia e Parasitologia	Life Sciences
30-60 thousand Brazilian reais	Male	Fabio Trindade Maranhão Costa	Microbiologia e Parasitologia	Life Sciences
30-60 thousand Brazilian reais	Female	Ana Luiza de Mattos Guaraldi	Microbiologia e Parasitologia	Life Sciences
30-60 thousand Brazilian reais	Female	Eliana Barreto Bergter	Microbiologia e Parasitologia	Life Sciences
30-60 thousand Brazilian reais	Female	Marisa Cotta Mancini	Educação Física, Fonoaudiologia, Fisioterapia e Terapia Ocupacional	Life Sciences
30-60 thousand Brazilian reais	Female	Ester da Silva	Educação Física, Fonoaudiologia, Fisioterapia e Terapia Ocupacional	Life Sciences
30-60 thousand Brazilian reais	Male	Orlando Laitano Lionello Neto	Educação Física, Fonoaudiologia, Fisioterapia e Terapia Ocupacional	Life Sciences
30-60 thousand Brazilian reais	Male	Heleodório Honorato dos Santos	Educação Física, Fonoaudiologia, Fisioterapia e Terapia Ocupacional	Life Sciences
30-60 thousand Brazilian reais	Female	Selma Lancman	Educação Física, Fonoaudiologia, Fisioterapia e Terapia Ocupacional	Life Sciences
30-60 thousand Brazilian reais	Male	Ricardo Moreno Lima	Educação Física, Fonoaudiologia, Fisioterapia e Terapia Ocupacional	Life Sciences
30-60 thousand Brazilian reais	Female	Claudia Santos Oliveira	Educação Física, Fonoaudiologia, Fisioterapia e Terapia Ocupacional	Life Sciences
30-60 thousand Brazilian reais	Male	Pedro Dal Lago	Educação Física, Fonoaudiologia, Fisioterapia e Terapia Ocupacional	Life Sciences
30-60 thousand Brazilian reais	Female	Aparecida Maria Catai	Educação Física, Fonoaudiologia, Fisioterapia e Terapia Ocupacional	Life Sciences
30-60 thousand Brazilian reais	Female	Carol Virginia Gois Leandro	Educação Física, Fonoaudiologia, Fisioterapia e Terapia Ocupacional	Life Sciences
30-60 thousand Brazilian reais	Female	Audrey Borghi Silva	Educação Física, Fonoaudiologia, Fisioterapia e Terapia Ocupacional	Life Sciences
30-60 thousand Brazilian reais	Male	Hilton Justino da Silva	Educação Física, Fonoaudiologia, Fisioterapia e Terapia Ocupacional	Life Sciences
30-60 thousand Brazilian reais	Female	Patricia Chakur Brum	Educação Física, Fonoaudiologia, Fisioterapia e Terapia Ocupacional	Life Sciences
30-60 thousand Brazilian reais	Male	Fabio Yuzo Nakamura	Educação Física, Fonoaudiologia, Fisioterapia e Terapia Ocupacional	Life Sciences
30-60 thousand Brazilian reais	Female	Ana Raquel Rodrigues Lindquist	Educação Física, Fonoaudiologia, Fisioterapia e Terapia Ocupacional	Life Sciences
30-60 thousand Brazilian reais	Female	Raquel Rodrigues Britto	Educação Física, Fonoaudiologia, Fisioterapia e Terapia Ocupacional	Life Sciences
30-60 thousand Brazilian reais	Male	Ricardo Aurino de Pinho	Educação Física, Fonoaudiologia, Fisioterapia e Terapia Ocupacional	Life Sciences
30-60 thousand Brazilian reais	Male	Jamilson Simões Brasileiro	Educação Física, Fonoaudiologia, Fisioterapia e Terapia Ocupacional	Life Sciences
30-60 thousand Brazilian reais	Female	Selma Sousa Bruno	Educação Física, Fonoaudiologia, Fisioterapia e Terapia Ocupacional	Life Sciences
30-60 thousand Brazilian reais	Female	Dionei Ramos	Educação Física, Fonoaudiologia, Fisioterapia e Terapia Ocupacional	Life Sciences
30-60 thousand Brazilian reais	Male	Marcos Doederlein Polito	Educação Física, Fonoaudiologia, Fisioterapia e Terapia Ocupacional	Life Sciences
30-60 thousand Brazilian reais	Male	Samuel dos Santos Valença	Educação Física, Fonoaudiologia, Fisioterapia e Terapia Ocupacional	Life Sciences
30-60 thousand Brazilian reais	Female	Marine Raquel Diniz da Rosa	Educação Física, Fonoaudiologia, Fisioterapia e Terapia Ocupacional	Life Sciences
30-60 thousand Brazilian reais	Male	Luiz Guilherme Antonacci Guglielmo	Educação Física, Fonoaudiologia, Fisioterapia e Terapia Ocupacional	Life Sciences
30-60 thousand Brazilian reais	Male	Ricardo Oliveira Guerra	Educação Física, Fonoaudiologia, Fisioterapia e Terapia Ocupacional	Life Sciences
30-60 thousand Brazilian reais	Male	Celso Ricardo Fernandes de Carvalho	Educação Física, Fonoaudiologia, Fisioterapia e Terapia Ocupacional	Life Sciences
30-60 thousand Brazilian reais	Male	Antonio Jose Natali	Educação Física, Fonoaudiologia, Fisioterapia e Terapia Ocupacional	Life Sciences
30-60 thousand Brazilian reais	Male	Herbert Gustavo Simões	Educação Física, Fonoaudiologia, Fisioterapia e Terapia Ocupacional	Life Sciences
30-60 thousand Brazilian reais	Female	Fátima Valéria Rodrigues de Paula	Educação Física, Fonoaudiologia, Fisioterapia e Terapia Ocupacional	Life Sciences
30-60 thousand Brazilian reais	Male	Amilton da Cruz Santos	Educação Física, Fonoaudiologia, Fisioterapia e Terapia Ocupacional	Life Sciences
30-60 thousand Brazilian reais	Female	Carla Eponina Hori	Engenharia Química	Exact Sciences
30-60 thousand Brazilian reais	Female	Silvana Mattedi e Silva	Engenharia Química	Exact Sciences
30-60 thousand Brazilian reais	Female	Elisabeth de Fatima Pires Augusto	Engenharia Química	Exact Sciences
30-60 thousand Brazilian reais	Female	Simoni Margareti Plentz Meneghetti	Engenharia Química	Exact Sciences
30-60 thousand Brazilian reais	Female	Andrea Lopes de Oliveira Ferreira	Engenharia Química	Exact Sciences
30-60 thousand Brazilian reais	Female	Mariana de Mattos Vieira Mello Souza	Engenharia Química	Exact Sciences
30-60 thousand Brazilian reais	Female	Liliane Maria Ferrareso Lona	Engenharia Química	Exact Sciences
30-60 thousand Brazilian reais	Male	Edson Antonio da Silva	Engenharia Química	Exact Sciences
30-60 thousand Brazilian reais	Male	Rodrigo Silveira Vieira	Engenharia Química	Exact Sciences
30-60 thousand Brazilian reais	Male	Elton Franceschi	Engenharia Química	Exact Sciences
30-60 thousand Brazilian reais	Male	Fernando Gomes de Souza Júnior	Engenharia Química	Exact Sciences
30-60 thousand Brazilian reais	Female	Glaura Goulart Silva	Engenharia Química	Exact Sciences
30-60 thousand Brazilian reais	Male	Marcos Antonio de Souza Barrozo	Engenharia Química	Exact Sciences
30-60 thousand Brazilian reais	Female	Luciana Porto de Souza Vandenberghe	Engenharia Química	Exact Sciences
30-60 thousand Brazilian reais	Male	Silvio Alexandre Beisl Vieira de Melo	Engenharia Química	Exact Sciences
30-60 thousand Brazilian reais	Male	Pedro Augusto Arroyo	Engenharia Química	Exact Sciences
30-60 thousand Brazilian reais	Male	Jose Eduardo dos Santos	Ciências Ambientais	Exact Sciences
30-60 thousand Brazilian reais	Male	Marcos Von Sperling	Ciências Ambientais	Exact Sciences
30-60 thousand Brazilian reais	Female	Maria do Carmo Calijuri	Ciências Ambientais	Exact Sciences
30-60 thousand Brazilian reais	Male	Everton Blainski	Ciências Ambientais	Exact Sciences
30-60 thousand Brazilian reais	Female	Jussara Cabral Cruz	Ciências Ambientais	Exact Sciences
30-60 thousand Brazilian reais	Male	Leandro Valle Ferreira	Ciências Ambientais	Exact Sciences
30-60 thousand Brazilian reais	Male	Carlos Antonio Costa dos Santos	Ciências Ambientais	Exact Sciences
30-60 thousand Brazilian reais	Male	Carlos Alessandre Domingos Lentini	Ciências Ambientais	Exact Sciences
30-60 thousand Brazilian reais	Male	Francisco Suetonio Bastos Mota	Ciências Ambientais	Exact Sciences
30-60 thousand Brazilian reais	Male	Ricardo Henrique Moreton Godoi	Ciências Ambientais	Exact Sciences
30-60 thousand Brazilian reais	Male	Edson Luís Nunes	Ciências Ambientais	Exact Sciences
30-60 thousand Brazilian reais	Male	Ricardo Franci Goncalves	Ciências Ambientais	Exact Sciences
30-60 thousand Brazilian reais	Male	Versiane Albis Leão	Ciências Ambientais	Exact Sciences
30-60 thousand Brazilian reais	Male	Cristovão Vicente Scapulatempo Fernandes	Ciências Ambientais	Exact Sciences
30-60 thousand Brazilian reais	Female	Soraya Moreno Palácio	Ciências Ambientais	Exact Sciences
30-60 thousand Brazilian reais	Male	Luiz Alberto Ribeiro Mendonça	Ciências Ambientais	Exact Sciences
30-60 thousand Brazilian reais	Female	Carla Bernadete Madureira Cruz	Ciências Ambientais	Exact Sciences
30-60 thousand Brazilian reais	Female	Ann Honor Mounteer	Ciências Ambientais	Exact Sciences
30-60 thousand Brazilian reais	Male	Edson Cezar Wendland	Ciências Ambientais	Exact Sciences
30-60 thousand Brazilian reais	Female	Kelly de Araujo Rodrigues Pessoa	Ciências Ambientais	Exact Sciences
30-60 thousand Brazilian reais	Male	Adriano Marlisom Leao de Sousa	Ciências Ambientais	Exact Sciences
30-60 thousand Brazilian reais	Male	Gunther Brucha	Ciências Ambientais	Exact Sciences
30-60 thousand Brazilian reais	Female	Ticiana Marinho de Carvalho Studart	Ciências Ambientais	Exact Sciences
30-60 thousand Brazilian reais	Male	André Henrique Rosa	Ciências Ambientais	Exact Sciences
30-60 thousand Brazilian reais	Male	Flávio Barbosa Justino	Ciências Ambientais	Exact Sciences
30-60 thousand Brazilian reais	Female	Maria Cecília Barbosa de Toledo	Ciências Ambientais	Exact Sciences
30-60 thousand Brazilian reais	Male	Flávio Rubens Lapolli	Ciências Ambientais	Exact Sciences
30-60 thousand Brazilian reais	Female	Aline Carneiro Silverol	Ciências Ambientais	Exact Sciences
30-60 thousand Brazilian reais	Male	Alfredo Marcelo Grigio	Ciências Ambientais	Exact Sciences
30-60 thousand Brazilian reais	Female	Janaina Braga do Carmo	Ciências Ambientais	Exact Sciences
30-60 thousand Brazilian reais	Male	Eduardo Cyrino de Oliveira Filho	Ciências Ambientais	Exact Sciences
30-60 thousand Brazilian reais	Male	Everaldo Barreiros de Souza	Ciências Ambientais	Exact Sciences
30-60 thousand Brazilian reais	Male	Jean Remy Davee Guimaraes	Ciências Ambientais	Exact Sciences
30-60 thousand Brazilian reais	Male	Alan Cavalcanti da Cunha	Ciências Ambientais	Exact Sciences
30-60 thousand Brazilian reais	Male	José Carlos de Araújo	Ciências Ambientais	Exact Sciences
30-60 thousand Brazilian reais	Male	Dalton José Carneiro	Aqüicultura e Recursos Pesqueiros	Life Sciences
30-60 thousand Brazilian reais	Male	Vinicius Ronzani Cerqueira	Aqüicultura e Recursos Pesqueiros	Life Sciences
30-60 thousand Brazilian reais	Female	Maria Risoleta Freire Marques	Aqüicultura e Recursos Pesqueiros	Life Sciences
30-60 thousand Brazilian reais	Male	Nelson Ferreira Fontoura	Aqüicultura e Recursos Pesqueiros	Life Sciences
30-60 thousand Brazilian reais	Female	Monica Yumi Tsuzuki	Aqüicultura e Recursos Pesqueiros	Life Sciences
30-60 thousand Brazilian reais	Female	Flavia Lucena Frédou	Aqüicultura e Recursos Pesqueiros	Life Sciences
30-60 thousand Brazilian reais	Male	Wilson Francisco Britto Wasielesky Junior	Aqüicultura e Recursos Pesqueiros	Life Sciences
30-60 thousand Brazilian reais	Male	Alex Augusto Gonçalves	Aqüicultura e Recursos Pesqueiros	Life Sciences
30-60 thousand Brazilian reais	Male	Ronaldo Olivera Cavalli	Aqüicultura e Recursos Pesqueiros	Life Sciences
30-60 thousand Brazilian reais	Female	Fabíola Xochilt Valdez Domingos	Aqüicultura e Recursos Pesqueiros	Life Sciences
30-60 thousand Brazilian reais	Male	Eudes de Souza Correia	Aqüicultura e Recursos Pesqueiros	Life Sciences
30-60 thousand Brazilian reais	Female	Erica Alves Gonzalez Vidal	Aqüicultura e Recursos Pesqueiros	Life Sciences
30-60 thousand Brazilian reais	Female	Enilda Rosendo do Nascimento	Enfermagem	Life Sciences
30-60 thousand Brazilian reais	Female	Elucir Gir	Enfermagem	Life Sciences
30-60 thousand Brazilian reais	Female	Carmen Gracinda Silvan Scochi	Enfermagem	Life Sciences
30-60 thousand Brazilian reais	Female	Thelma Leite de Araujo	Enfermagem	Life Sciences
30-60 thousand Brazilian reais	Female	Thais Aidar de Freitas Mathias	Enfermagem	Life Sciences
30-60 thousand Brazilian reais	Female	Elma Lourdes Campos Pavone Zoboli	Enfermagem	Life Sciences
30-60 thousand Brazilian reais	Female	Márcia de Assunção Ferreira	Enfermagem	Life Sciences
30-60 thousand Brazilian reais	Female	Ivone Evangelista Cabral	Enfermagem	Life Sciences
30-60 thousand Brazilian reais	Female	Jussara Gue Martini	Enfermagem	Life Sciences
30-60 thousand Brazilian reais	Female	Maria Luiza Gonzalez Riesco	Enfermagem	Life Sciences
30-60 thousand Brazilian reais	Female	Maria Vera Lúcia Moreira Leitão Cardoso	Enfermagem	Life Sciences
30-60 thousand Brazilian reais	Female	Elizeth Paz da Silva Heldt	Enfermagem	Life Sciences
30-60 thousand Brazilian reais	Male	Gilson de Vasconcelos Torres	Enfermagem	Life Sciences
30-60 thousand Brazilian reais	Female	Marli Teresinha Gimeniz Galvão	Enfermagem	Life Sciences
30-60 thousand Brazilian reais	Female	Erika de Cássia Lopes Chaves	Enfermagem	Life Sciences
30-60 thousand Brazilian reais	Female	Ana Marcia Spano Nakano	Enfermagem	Life Sciences
30-60 thousand Brazilian reais	Female	Luciane Prado Kantorski	Enfermagem	Life Sciences
30-60 thousand Brazilian reais	Female	Sheila Araujo Teles	Enfermagem	Life Sciences
30-60 thousand Brazilian reais	Female	Maria das Gracas Carvalho	Farmácia	Life Sciences
30-60 thousand Brazilian reais	Female	Marcia Regina Piuvezam	Farmácia	Life Sciences
30-60 thousand Brazilian reais	Male	Pedro José Rolim Neto	Farmácia	Life Sciences
30-60 thousand Brazilian reais	Female	Ana Cristina Lima Leite	Farmácia	Life Sciences
30-60 thousand Brazilian reais	Male	Osvaldo de Freitas	Farmácia	Life Sciences
30-60 thousand Brazilian reais	Female	Suely Vilela Sampaio	Farmácia	Life Sciences
30-60 thousand Brazilian reais	Female	Grace Gosmann	Farmácia	Life Sciences
30-60 thousand Brazilian reais	Female	Ivone Carvalho	Farmácia	Life Sciences
30-60 thousand Brazilian reais	Female	Teresa Cristina Tavares Dalla Costa	Farmácia	Life Sciences
30-60 thousand Brazilian reais	Male	Celso Vataru Nakamura	Farmácia	Life Sciences
30-60 thousand Brazilian reais	Male	Sydney Hartz Alves	Farmácia	Life Sciences
30-60 thousand Brazilian reais	Female	Ana Paula Salles Moura Fernandes	Farmácia	Life Sciences
30-60 thousand Brazilian reais	Male	Valbert Nascimento Cardoso	Farmácia	Life Sciences
30-60 thousand Brazilian reais	Male	Pedro Eduardo Fröehlich	Farmácia	Life Sciences
30-60 thousand Brazilian reais	Male	Anderson Cavalcante Guimaraes	Farmácia	Life Sciences
30-60 thousand Brazilian reais	Female	Elenara Maria Teixeira Lemos Senna	Farmácia	Life Sciences
30-60 thousand Brazilian reais	Female	Ana Lucia da Costa Darini	Farmácia	Life Sciences
30-60 thousand Brazilian reais	Male	Luiz Alberto Lira Soares	Farmácia	Life Sciences
30-60 thousand Brazilian reais	Male	Marcelo Dias Baruffi	Farmácia	Life Sciences
30-60 thousand Brazilian reais	Female	Christiane Pienna Soares	Farmácia	Life Sciences
30-60 thousand Brazilian reais	Female	Marta Maria de Franca Fonteles	Farmácia	Life Sciences
30-60 thousand Brazilian reais	Female	Maria Fâni Dolabela	Farmácia	Life Sciences
30-60 thousand Brazilian reais	Male	Damião Pergentino de Sousa	Farmácia	Life Sciences
30-60 thousand Brazilian reais	Male	Diogenes Aparicio Garcia Cortez	Farmácia	Life Sciences
30-60 thousand Brazilian reais	Male	Eduardo de Jesus Oliveira	Farmácia	Life Sciences
30-60 thousand Brazilian reais	Male	Carlos Rangel Rodrigues	Farmácia	Life Sciences
30-60 thousand Brazilian reais	Female	Marize Campos Valadares	Farmácia	Life Sciences
30-60 thousand Brazilian reais	Male	Mauricio Yonamine	Farmácia	Life Sciences
30-60 thousand Brazilian reais	Female	Maria do Carmo Alves de Lima	Farmácia	Life Sciences
30-60 thousand Brazilian reais	Female	Bagnolia Araujo da Silva	Farmácia	Life Sciences
30-60 thousand Brazilian reais	Female	Margareth Linde Athayde	Farmácia	Life Sciences
30-60 thousand Brazilian reais	Male	Ronaldo Nogueira de Moraes Pitombo	Farmácia	Life Sciences
30-60 thousand Brazilian reais	Male	Armando da Silva Cunha Júnior	Farmácia	Life Sciences
30-60 thousand Brazilian reais	Female	Nereide Stela Santos Magalhães	Farmácia	Life Sciences
30-60 thousand Brazilian reais	Male	Lucindo José Quintans Júnior	Farmácia	Life Sciences
30-60 thousand Brazilian reais	Female	Maria Palmira Daflon Gremião	Farmácia	Life Sciences
30-60 thousand Brazilian reais	Female	Rosario Dominguez Crespo Hirata	Farmácia	Life Sciences
30-60 thousand Brazilian reais	Female	Luzia Kalyne Almeida Moreira Leal	Farmácia	Life Sciences
30-60 thousand Brazilian reais	Male	Arnobio Antonio da Silva Junior	Farmácia	Life Sciences
30-60 thousand Brazilian reais	Female	Maria José Soares Mendes Giannini	Farmácia	Life Sciences
30-60 thousand Brazilian reais	Female	Maique Weber Biavatti	Farmácia	Life Sciences
30-60 thousand Brazilian reais	Male	João Xavier de Araújo Júnior	Farmácia	Life Sciences
30-60 thousand Brazilian reais	Female	Myrna Cristina Bonaldo	Biotecnologia	Life Sciences
30-60 thousand Brazilian reais	Male	Vitor Baranauskas	Biotecnologia	Life Sciences
30-60 thousand Brazilian reais	Male	Thales Lima Rocha	Biotecnologia	Life Sciences
30-60 thousand Brazilian reais	Male	Giancarlo Pasquali	Biotecnologia	Life Sciences
30-60 thousand Brazilian reais	Male	Fernando Araripe Gonçalves Torres	Biotecnologia	Life Sciences
30-60 thousand Brazilian reais	Female	Maria Cristina Mattar da Silva	Biotecnologia	Life Sciences
30-60 thousand Brazilian reais	Female	Claudia Nunes Duarte dos Santos	Biotecnologia	Life Sciences
30-60 thousand Brazilian reais	Male	Rinaldo Wellerson Pereira	Biotecnologia	Life Sciences
30-60 thousand Brazilian reais	Male	Miguel Daniel Noseda	Biotecnologia	Life Sciences
30-60 thousand Brazilian reais	Female	Ana Carolina Maisonnave Arisi	Biotecnologia	Life Sciences
30-60 thousand Brazilian reais	Male	Charrid Resgalla Junior	Biotecnologia	Life Sciences
30-60 thousand Brazilian reais	Male	Vitor Hugo Moreau da Cunha	Biotecnologia	Life Sciences
30-60 thousand Brazilian reais	Male	Vadim Viviani	Biotecnologia	Life Sciences
30-60 thousand Brazilian reais	Female	Leticia Veras Costa Lotufo	Biotecnologia	Life Sciences
30-60 thousand Brazilian reais	Female	Adriana Freitas Neves	Biotecnologia	Life Sciences
30-60 thousand Brazilian reais	Male	Roberto Araújo Sá	Biotecnologia	Life Sciences
30-60 thousand Brazilian reais	Male	Rodolfo Cordeiro Giunchetti	Biotecnologia	Life Sciences
30-60 thousand Brazilian reais	Female	Priscila Gava Mazzola	Biotecnologia	Life Sciences
30-60 thousand Brazilian reais	Male	Rodrigo Ribeiro Resende	Biotecnologia	Life Sciences
30-60 thousand Brazilian reais	Female	Tatiana Tais Sibov	Biotecnologia	Life Sciences
30-60 thousand Brazilian reais	Male	Pedro Ismael da Silva Junior	Biotecnologia	Life Sciences
30-60 thousand Brazilian reais	Female	Denise Maria Guimarães Freire	Biotecnologia	Life Sciences
30-60 thousand Brazilian reais	Male	Demetrius Antonio Machado de Araújo	Biotecnologia	Life Sciences
30-60 thousand Brazilian reais	Male	Márcio Viana Ramos	Biotecnologia	Life Sciences
30-60 thousand Brazilian reais	Male	Marcelino José dos Anjos	Energia Nuclear, Energia Renovável e Planejamento Energético	Exact Sciences
30-60 thousand Brazilian reais	Male	Wagner Reis da Costa Campos	Energia Nuclear, Energia Renovável e Planejamento Energético	Exact Sciences
30-60 thousand Brazilian reais	Male	Luís Eduardo Barreira Brandão	Energia Nuclear, Energia Renovável e Planejamento Energético	Exact Sciences
30-60 thousand Brazilian reais	Male	Geraldo Cechella Isaia	Engenharia Civil	Exact Sciences
30-60 thousand Brazilian reais	Male	Luiz Antonio Bressani	Engenharia Civil	Exact Sciences
30-60 thousand Brazilian reais	Male	Mauricio Ehrlich	Engenharia Civil	Exact Sciences
30-60 thousand Brazilian reais	Male	Severino Pereira Cavalcanti Marques	Engenharia Civil	Exact Sciences
30-60 thousand Brazilian reais	Male	Fernando Luiz Bastos Ribeiro	Engenharia Civil	Exact Sciences
30-60 thousand Brazilian reais	Male	Glicério Trichês	Engenharia Civil	Exact Sciences
30-60 thousand Brazilian reais	Male	José Julio de Cerqueira Pituba	Engenharia Civil	Exact Sciences
30-60 thousand Brazilian reais	Female	Silvana Maria Bastos Afonso da Silva	Engenharia Civil	Exact Sciences
30-60 thousand Brazilian reais	Male	Paulo Cesar Correia Gomes	Engenharia Civil	Exact Sciences
30-60 thousand Brazilian reais	Male	Antônio Acacio de Melo Neto	Engenharia Civil	Exact Sciences
30-60 thousand Brazilian reais	Male	Carlos Magluta	Engenharia Civil	Exact Sciences
30-60 thousand Brazilian reais	Female	Verônica Teixeira Franco Castelo Branco	Engenharia Civil	Exact Sciences
30-60 thousand Brazilian reais	Female	Maria das Graças Gardoni Almeida	Engenharia Civil	Exact Sciences
30-60 thousand Brazilian reais	Female	Angela Borges Masuero	Engenharia Civil	Exact Sciences
30-60 thousand Brazilian reais	Male	Zenón José Guzmán Del Prado	Engenharia Civil	Exact Sciences
30-60 thousand Brazilian reais	Male	Frederico Martins Alves da Silva	Engenharia Civil	Exact Sciences
30-60 thousand Brazilian reais	Male	Jose Wellington Rocha Tabosa	Física e Astronomia	Exact Sciences
30-60 thousand Brazilian reais	Male	Dante Homero Mosca Júnior	Física e Astronomia	Exact Sciences
30-60 thousand Brazilian reais	Male	Waldemar Augusto de Almeida Macedo	Física e Astronomia	Exact Sciences
30-60 thousand Brazilian reais	Male	Antonio Azevedo da Costa	Física e Astronomia	Exact Sciences
30-60 thousand Brazilian reais	Male	Pedro Luis Grande	Física e Astronomia	Exact Sciences
30-60 thousand Brazilian reais	Male	Sukarno Olavo Ferreira	Física e Astronomia	Exact Sciences
30-60 thousand Brazilian reais	Male	Rodrigo Barbosa Capaz	Física e Astronomia	Exact Sciences
30-60 thousand Brazilian reais	Male	Marcelo Leite Lyra	Física e Astronomia	Exact Sciences
30-60 thousand Brazilian reais	Male	Marcos Gomes Eleuterio da Luz	Física e Astronomia	Exact Sciences
30-60 thousand Brazilian reais	Male	Rodrigo Gribel Lacerda	Física e Astronomia	Exact Sciences
30-60 thousand Brazilian reais	Male	Niklaus Ursus Wetter	Física e Astronomia	Exact Sciences
30-60 thousand Brazilian reais	Male	Noelio Oliveira Dantas	Física e Astronomia	Exact Sciences
30-60 thousand Brazilian reais	Male	Glauco Santos Maciel	Física e Astronomia	Exact Sciences
30-60 thousand Brazilian reais	Male	Roberto Hiroki Miwa	Física e Astronomia	Exact Sciences
30-60 thousand Brazilian reais	Male	Alexandre Da Cas Viegas	Física e Astronomia	Exact Sciences
30-60 thousand Brazilian reais	Female	Erica Ribeiro Polycarpo Macedo	Física e Astronomia	Exact Sciences
30-60 thousand Brazilian reais	Male	Sanclayton Geraldo Carneiro Moreira	Física e Astronomia	Exact Sciences
30-60 thousand Brazilian reais	Male	Mauro Luciano Baesso	Física e Astronomia	Exact Sciences
30-60 thousand Brazilian reais	Male	Julian Penkov Geshev	Física e Astronomia	Exact Sciences
30-60 thousand Brazilian reais	Male	Sandro Marcio Lima	Física e Astronomia	Exact Sciences
30-60 thousand Brazilian reais	Male	Jean Carlo Santos	Física e Astronomia	Exact Sciences
30-60 thousand Brazilian reais	Male	Jose Domingos Ardisson	Física e Astronomia	Exact Sciences
30-60 thousand Brazilian reais	Male	Ivan Frederico Lupiano Dias	Física e Astronomia	Exact Sciences
30-60 thousand Brazilian reais	Male	Thierry Marcelino Passerat de Silans	Física e Astronomia	Exact Sciences
30-60 thousand Brazilian reais	Male	Luiz Gustavo de Oliveira Lopes Cançado	Física e Astronomia	Exact Sciences
30-60 thousand Brazilian reais	Male	Luis Ghivelder	Física e Astronomia	Exact Sciences
30-60 thousand Brazilian reais	Female	Debora Peres Menezes	Física e Astronomia	Exact Sciences
30-60 thousand Brazilian reais	Male	Kepler de Souza Oliveira Filho	Física e Astronomia	Exact Sciences
30-60 thousand Brazilian reais	Male	José Dias do Nascimento Júnior	Física e Astronomia	Exact Sciences
30-60 thousand Brazilian reais	Male	Ervin Kaminski Lenzi	Física e Astronomia	Exact Sciences
30-60 thousand Brazilian reais	Female	Monica Alonso Cotta	Física e Astronomia	Exact Sciences
30-60 thousand Brazilian reais	Male	Alexandre Marletta	Física e Astronomia	Exact Sciences
30-60 thousand Brazilian reais	Male	Antonio Fausto Neto	Artes, Ciência da Informação e Comunicação	Humanities
30-60 thousand Brazilian reais	Female	Regina Maria Marteleto	Artes, Ciência da Informação e Comunicação	Humanities
30-60 thousand Brazilian reais	Male	Joao Victor Boechat Gomide	Artes, Ciência da Informação e Comunicação	Humanities
30-60 thousand Brazilian reais	Female	Suzete Venturelli	Artes, Ciência da Informação e Comunicação	Humanities
30-60 thousand Brazilian reais	Female	Regina Helena Alves da Silva	Artes, Ciência da Informação e Comunicação	Humanities
30-60 thousand Brazilian reais	Female	Sonia Marta Rodrigues Raymundo	Artes, Ciência da Informação e Comunicação	Humanities
30-60 thousand Brazilian reais	Male	Jeder Silveira Janotti Junior	Artes, Ciência da Informação e Comunicação	Humanities
30-60 thousand Brazilian reais	Female	Fernanda Glória Bruno	Artes, Ciência da Informação e Comunicação	Humanities
30-60 thousand Brazilian reais	Female	Marilia Xavier Cury	Artes, Ciência da Informação e Comunicação	Humanities
30-60 thousand Brazilian reais	Male	Fernando Manoel Aleixo	Artes, Ciência da Informação e Comunicação	Humanities
30-60 thousand Brazilian reais	Female	Maria Ataide Malcher	Artes, Ciência da Informação e Comunicação	Humanities
30-60 thousand Brazilian reais	Male	Eugenio Ferreira Coelho	Engenharia Agrícola	Exact Sciences
30-60 thousand Brazilian reais	Male	Reimar Carlesso	Engenharia Agrícola	Exact Sciences
30-60 thousand Brazilian reais	Male	Aderson Soares de Andrade Júnior	Engenharia Agrícola	Exact Sciences
30-60 thousand Brazilian reais	Male	Carlos Eduardo Silva Volpato	Engenharia Agrícola	Exact Sciences
30-60 thousand Brazilian reais	Female	Daniella Jorge de Moura	Engenharia Agrícola	Exact Sciences
30-60 thousand Brazilian reais	Male	Alessandro Torres Campos	Engenharia Agrícola	Exact Sciences
30-60 thousand Brazilian reais	Male	Carlos Rogério de Mello	Engenharia Agrícola	Exact Sciences
30-60 thousand Brazilian reais	Male	Héliton Pandorfi	Engenharia Agrícola	Exact Sciences
30-60 thousand Brazilian reais	Male	Alberto Colombo	Engenharia Agrícola	Exact Sciences
30-60 thousand Brazilian reais	Female	Leda Rita Dantonino Faroni	Engenharia Agrícola	Exact Sciences
30-60 thousand Brazilian reais	Male	Maurício Antonio Coelho Filho	Engenharia Agrícola	Exact Sciences
30-60 thousand Brazilian reais	Male	Luiz Pereira Calôba	Engenharia Elétrica e Biomédica	Exact Sciences
30-60 thousand Brazilian reais	Male	Cursino Brandão Jacobina	Engenharia Elétrica e Biomédica	Exact Sciences
30-60 thousand Brazilian reais	Male	Richard Magdalena Stephan	Engenharia Elétrica e Biomédica	Exact Sciences
30-60 thousand Brazilian reais	Male	Jose Carlos Moreira Bermudez	Engenharia Elétrica e Biomédica	Exact Sciences
30-60 thousand Brazilian reais	Male	Rondinelli Donizetti Herculano	Engenharia Elétrica e Biomédica	Exact Sciences
30-60 thousand Brazilian reais	Male	Jaime Arturo Ramírez	Engenharia Elétrica e Biomédica	Exact Sciences
30-60 thousand Brazilian reais	Male	Ricardo Hiroshi Caldeira Takahashi	Engenharia Elétrica e Biomédica	Exact Sciences
30-60 thousand Brazilian reais	Male	Mario Sarcinelli Filho	Engenharia Elétrica e Biomédica	Exact Sciences
30-60 thousand Brazilian reais	Male	Renato Cardoso Mesquita	Engenharia Elétrica e Biomédica	Exact Sciences
30-60 thousand Brazilian reais	Male	Andrés Pablo López Barbero	Engenharia Elétrica e Biomédica	Exact Sciences
30-60 thousand Brazilian reais	Male	Sergio Lima Netto	Engenharia Elétrica e Biomédica	Exact Sciences
30-60 thousand Brazilian reais	Male	Joao Marcos Travassos Romano	Engenharia Elétrica e Biomédica	Exact Sciences
30-60 thousand Brazilian reais	Male	Rubens Viana Ramos	Engenharia Elétrica e Biomédica	Exact Sciences
30-60 thousand Brazilian reais	Female	Carmen Lucia Tancredo Borges	Engenharia Elétrica e Biomédica	Exact Sciences
30-60 thousand Brazilian reais	Male	Fernando Pinhabel Marafão	Engenharia Elétrica e Biomédica	Exact Sciences
30-60 thousand Brazilian reais	Male	Marcio Flavio Dutra Moraes	Engenharia Elétrica e Biomédica	Exact Sciences
30-60 thousand Brazilian reais	Male	Marcos Vinício Thomas Heckler	Engenharia Elétrica e Biomédica	Exact Sciences
30-60 thousand Brazilian reais	Male	Humberto Pinheiro	Engenharia Elétrica e Biomédica	Exact Sciences
30-60 thousand Brazilian reais	Male	Marcos Antonio Ruggieri Franco	Engenharia Elétrica e Biomédica	Exact Sciences
30-60 thousand Brazilian reais	Female	Mariangela Carneiro	Saúde Coletiva e Nutrição	Life Sciences
30-60 thousand Brazilian reais	Female	Rosely Sichieri	Saúde Coletiva e Nutrição	Life Sciences
30-60 thousand Brazilian reais	Female	Josefina Bressan	Saúde Coletiva e Nutrição	Life Sciences
30-60 thousand Brazilian reais	Male	George Luiz Lins Machado Coelho	Saúde Coletiva e Nutrição	Life Sciences
30-60 thousand Brazilian reais	Female	Maria Lúcia Magalhães Bosi	Saúde Coletiva e Nutrição	Life Sciences
30-60 thousand Brazilian reais	Female	Regina Mara Fisberg	Saúde Coletiva e Nutrição	Life Sciences
30-60 thousand Brazilian reais	Female	Adriana Suely de Oliveira Melo	Saúde Coletiva e Nutrição	Life Sciences
30-60 thousand Brazilian reais	Male	Giovanni Marcos Lovisi	Saúde Coletiva e Nutrição	Life Sciences
30-60 thousand Brazilian reais	Female	Daniela Riva Knauth	Saúde Coletiva e Nutrição	Life Sciences
30-60 thousand Brazilian reais	Male	Raul Manhães de Castro	Saúde Coletiva e Nutrição	Life Sciences
30-60 thousand Brazilian reais	Female	Maria Margareth Veloso Naves	Saúde Coletiva e Nutrição	Life Sciences
30-60 thousand Brazilian reais	Male	Nildimar Honorio Rocha	Saúde Coletiva e Nutrição	Life Sciences
30-60 thousand Brazilian reais	Female	Suzi Barletto Cavalli	Saúde Coletiva e Nutrição	Life Sciences
30-60 thousand Brazilian reais	Female	Vera Silvia Facciolla Paiva	Saúde Coletiva e Nutrição	Life Sciences
30-60 thousand Brazilian reais	Male	Marcio Alberto Torsoni	Saúde Coletiva e Nutrição	Life Sciences
30-60 thousand Brazilian reais	Female	Fátima Lúcia de Carvalho Sardinha	Saúde Coletiva e Nutrição	Life Sciences
30-60 thousand Brazilian reais	Male	João Luiz Dornelles Bastos	Saúde Coletiva e Nutrição	Life Sciences
30-60 thousand Brazilian reais	Female	Zila van der Meer Sanchez Dutenhefner	Saúde Coletiva e Nutrição	Life Sciences
30-60 thousand Brazilian reais	Female	Neide Emy Kurokawa e Silva	Saúde Coletiva e Nutrição	Life Sciences
30-60 thousand Brazilian reais	Male	James Robert Welch	Saúde Coletiva e Nutrição	Life Sciences
30-60 thousand Brazilian reais	Female	Carla Campos Muniz Medeiros	Saúde Coletiva e Nutrição	Life Sciences
30-60 thousand Brazilian reais	Male	Ricardo Tavares Pinheiro	Saúde Coletiva e Nutrição	Life Sciences
30-60 thousand Brazilian reais	Male	Darci Neves dos Santos	Saúde Coletiva e Nutrição	Life Sciences
30-60 thousand Brazilian reais	Male	Alexandre da Costa Pereira	Saúde Coletiva e Nutrição	Life Sciences
30-60 thousand Brazilian reais	Male	Raimundo Carlos Silvério Freire	Microeletrônica	Exact Sciences
30-60 thousand Brazilian reais	Male	João Antonio Martino	Microeletrônica	Exact Sciences
30-60 thousand Brazilian reais	Male	Tales Cleber Pimenta	Microeletrônica	Exact Sciences
30-60 thousand Brazilian reais	Male	Henri Ivanov Boudinov	Microeletrônica	Exact Sciences
30-60 thousand Brazilian reais	Female	Ana Lucia Kassouf	Administração, Contabilidade e Economia	Humanities
30-60 thousand Brazilian reais	Male	Sérgio Carvalho Benício de Mello	Administração, Contabilidade e Economia	Humanities
30-60 thousand Brazilian reais	Female	Mônica Cavalcanti Sá de Abreu	Administração, Contabilidade e Economia	Humanities
30-60 thousand Brazilian reais	Female	Rosimeri de Fátima Carvalho da Silva	Administração, Contabilidade e Economia	Humanities
30-60 thousand Brazilian reais	Male	Eduardo Simões de Almeida	Administração, Contabilidade e Economia	Humanities
30-60 thousand Brazilian reais	Male	Wilfredo Fernando Leiva Maldonado	Administração, Contabilidade e Economia	Humanities
30-60 thousand Brazilian reais	Male	Heitor Takashi Kato	Administração, Contabilidade e Economia	Humanities
30-60 thousand Brazilian reais	Male	André Luiz Maranhão de Souza Leão	Administração, Contabilidade e Economia	Humanities
30-60 thousand Brazilian reais	Male	Marco Aurélio Marques Ferreira	Administração, Contabilidade e Economia	Humanities
30-60 thousand Brazilian reais	Male	Olivier Francois Vilpoux	Administração, Contabilidade e Economia	Humanities
30-60 thousand Brazilian reais	Male	Alsones Balestrin	Administração, Contabilidade e Economia	Humanities
30-60 thousand Brazilian reais	Male	Alexandre de Pádua Carrieri	Administração, Contabilidade e Economia	Humanities
30-60 thousand Brazilian reais	Male	José Angelo Costa do Amor Divino	Administração, Contabilidade e Economia	Humanities
30-60 thousand Brazilian reais	Female	Fátima Regina Ney Matos	Administração, Contabilidade e Economia	Humanities
30-60 thousand Brazilian reais	Male	Luiz Eduardo Teixeira Brandão	Administração, Contabilidade e Economia	Humanities
30-60 thousand Brazilian reais	Male	Celso Augusto de Matos	Administração, Contabilidade e Economia	Humanities
30-60 thousand Brazilian reais	Male	Augusto Cézar de Aquino Cabral	Administração, Contabilidade e Economia	Humanities
30-60 thousand Brazilian reais	Male	Iuri Gavronski	Administração, Contabilidade e Economia	Humanities
30-60 thousand Brazilian reais	Male	Thiago Ferreira Dias	Administração, Contabilidade e Economia	Humanities
30-60 thousand Brazilian reais	Male	Waldemar Antonio da Rocha de Souza	Administração, Contabilidade e Economia	Humanities
30-60 thousand Brazilian reais	Male	Roberto da Silva	Ciência e Tecnologia de Alimentos	Life Sciences
30-60 thousand Brazilian reais	Female	Maria Beatriz de Abreu Glória	Ciência e Tecnologia de Alimentos	Life Sciences
30-60 thousand Brazilian reais	Female	Roseane Fett	Ciência e Tecnologia de Alimentos	Life Sciences
30-60 thousand Brazilian reais	Male	Alberto Miele	Ciência e Tecnologia de Alimentos	Life Sciences
30-60 thousand Brazilian reais	Female	Celia Maria Landi Franco	Ciência e Tecnologia de Alimentos	Life Sciences
30-60 thousand Brazilian reais	Female	Neuza Maria Brunoro Costa	Ciência e Tecnologia de Alimentos	Life Sciences
30-60 thousand Brazilian reais	Male	Yoon Kil Chang	Ciência e Tecnologia de Alimentos	Life Sciences
30-60 thousand Brazilian reais	Female	Renata Tieko Nassu	Ciência e Tecnologia de Alimentos	Life Sciences
30-60 thousand Brazilian reais	Male	Rosinelson da Silva Pena	Ciência e Tecnologia de Alimentos	Life Sciences
30-60 thousand Brazilian reais	Female	Rosiane Lopes da Cunha	Ciência e Tecnologia de Alimentos	Life Sciences
30-60 thousand Brazilian reais	Male	Alexandre Guedes Torres	Ciência e Tecnologia de Alimentos	Life Sciences
30-60 thousand Brazilian reais	Male	Auri Brackmann	Ciência e Tecnologia de Alimentos	Life Sciences
30-60 thousand Brazilian reais	Female	Renata Cristina Ferreira Bonomo	Ciência e Tecnologia de Alimentos	Life Sciences
30-60 thousand Brazilian reais	Male	Ebenezer de Oliveira Silva	Ciência e Tecnologia de Alimentos	Life Sciences
30-60 thousand Brazilian reais	Female	Helen Treichel	Ciência e Tecnologia de Alimentos	Life Sciences
30-60 thousand Brazilian reais	Female	Sandra Regina Salvador Ferreira	Ciência e Tecnologia de Alimentos	Life Sciences
30-60 thousand Brazilian reais	Male	Celso Luiz Moretti	Ciência e Tecnologia de Alimentos	Life Sciences
30-60 thousand Brazilian reais	Male	Caciano Pelayo Zapata Noreña	Ciência e Tecnologia de Alimentos	Life Sciences
30-60 thousand Brazilian reais	Female	Telma Elita Bertolin	Ciência e Tecnologia de Alimentos	Life Sciences
30-60 thousand Brazilian reais	Male	Wilmer Edgard Luera Peña	Ciência e Tecnologia de Alimentos	Life Sciences
30-60 thousand Brazilian reais	Male	Juliano Lemos Bicas	Ciência e Tecnologia de Alimentos	Life Sciences
30-60 thousand Brazilian reais	Male	Luiz Antonio de Almeida Pinto	Ciência e Tecnologia de Alimentos	Life Sciences
30-60 thousand Brazilian reais	Male	Wladimir Padilha da Silva	Ciência e Tecnologia de Alimentos	Life Sciences
30-60 thousand Brazilian reais	Male	Nilson Evelazio de Souza	Ciência e Tecnologia de Alimentos	Life Sciences
30-60 thousand Brazilian reais	Female	Glaucia Maria Falcao de Aragao	Ciência e Tecnologia de Alimentos	Life Sciences
30-60 thousand Brazilian reais	Female	Nilda de Fatima Ferreira Soares	Ciência e Tecnologia de Alimentos	Life Sciences
30-60 thousand Brazilian reais	Female	Maria Angela de Almeida Meireles Petenate	Ciência e Tecnologia de Alimentos	Life Sciences
30-60 thousand Brazilian reais	Female	Rita de Cássia Ramos do Egypto Queiroga	Ciência e Tecnologia de Alimentos	Life Sciences
30-60 thousand Brazilian reais	Male	Jefferson Luiz Gomes Correa	Ciência e Tecnologia de Alimentos	Life Sciences
30-60 thousand Brazilian reais	Male	Adalberto Ramon Vieyra	Biofísica, Bioquímica, Farmacologia, Fisiologia e Neurociências	Life Sciences
30-60 thousand Brazilian reais	Male	Pedro Lagerblad de Oliveira	Biofísica, Bioquímica, Farmacologia, Fisiologia e Neurociências	Life Sciences
30-60 thousand Brazilian reais	Male	Jose Roberto Meyer Fernandes	Biofísica, Bioquímica, Farmacologia, Fisiologia e Neurociências	Life Sciences
30-60 thousand Brazilian reais	Female	Eleonora Kurtenbach	Biofísica, Bioquímica, Farmacologia, Fisiologia e Neurociências	Life Sciences
30-60 thousand Brazilian reais	Male	Francois Germain Noel	Biofísica, Bioquímica, Farmacologia, Fisiologia e Neurociências	Life Sciences
30-60 thousand Brazilian reais	Male	José Luiz Martins do Nascimento	Biofísica, Bioquímica, Farmacologia, Fisiologia e Neurociências	Life Sciences
30-60 thousand Brazilian reais	Male	Rui Curi	Biofísica, Bioquímica, Farmacologia, Fisiologia e Neurociências	Life Sciences
30-60 thousand Brazilian reais	Female	Carla Dalmaz	Biofísica, Bioquímica, Farmacologia, Fisiologia e Neurociências	Life Sciences
30-60 thousand Brazilian reais	Male	Sergio Henrique Ferreira	Biofísica, Bioquímica, Farmacologia, Fisiologia e Neurociências	Life Sciences
30-60 thousand Brazilian reais	Male	Roberto Paes de Carvalho	Biofísica, Bioquímica, Farmacologia, Fisiologia e Neurociências	Life Sciences
30-60 thousand Brazilian reais	Male	Giles Alexander Rae	Biofísica, Bioquímica, Farmacologia, Fisiologia e Neurociências	Life Sciences
30-60 thousand Brazilian reais	Male	Sergio Marangoni	Biofísica, Bioquímica, Farmacologia, Fisiologia e Neurociências	Life Sciences
30-60 thousand Brazilian reais	Male	Roberto Takashi Sudo	Biofísica, Bioquímica, Farmacologia, Fisiologia e Neurociências	Life Sciences
30-60 thousand Brazilian reais	Female	Aline Maria da Silva	Biofísica, Bioquímica, Farmacologia, Fisiologia e Neurociências	Life Sciences
30-60 thousand Brazilian reais	Male	Sergio Neuenschwander	Biofísica, Bioquímica, Farmacologia, Fisiologia e Neurociências	Life Sciences
30-60 thousand Brazilian reais	Female	Maria Claudia Costa Irigoyen	Biofísica, Bioquímica, Farmacologia, Fisiologia e Neurociências	Life Sciences
30-60 thousand Brazilian reais	Male	José César Rosa	Biofísica, Bioquímica, Farmacologia, Fisiologia e Neurociências	Life Sciences
30-60 thousand Brazilian reais	Male	Cristoforo Scavone	Biofísica, Bioquímica, Farmacologia, Fisiologia e Neurociências	Life Sciences
30-60 thousand Brazilian reais	Male	Marco Aurelio Krieger	Biofísica, Bioquímica, Farmacologia, Fisiologia e Neurociências	Life Sciences
30-60 thousand Brazilian reais	Male	Hernan Francisco Terenzi	Biofísica, Bioquímica, Farmacologia, Fisiologia e Neurociências	Life Sciences
30-60 thousand Brazilian reais	Male	Carlos Fernando de Mello	Biofísica, Bioquímica, Farmacologia, Fisiologia e Neurociências	Life Sciences
30-60 thousand Brazilian reais	Female	Andrea Thompson Da Poian	Biofísica, Bioquímica, Farmacologia, Fisiologia e Neurociências	Life Sciences
30-60 thousand Brazilian reais	Female	Carla Ines Tasca	Biofísica, Bioquímica, Farmacologia, Fisiologia e Neurociências	Life Sciences
30-60 thousand Brazilian reais	Male	Alcir Luiz Dafre	Biofísica, Bioquímica, Farmacologia, Fisiologia e Neurociências	Life Sciences
30-60 thousand Brazilian reais	Male	Jose Claudio Fonseca Moreira	Biofísica, Bioquímica, Farmacologia, Fisiologia e Neurociências	Life Sciences
30-60 thousand Brazilian reais	Male	Mauro Sérgio Gonçalves Pavão	Biofísica, Bioquímica, Farmacologia, Fisiologia e Neurociências	Life Sciences
30-60 thousand Brazilian reais	Female	Tania Cristina Pithon Curi	Biofísica, Bioquímica, Farmacologia, Fisiologia e Neurociências	Life Sciences
30-60 thousand Brazilian reais	Female	Leda Satie Chubatsu	Biofísica, Bioquímica, Farmacologia, Fisiologia e Neurociências	Life Sciences
30-60 thousand Brazilian reais	Male	Ronaldo da Silva Mohana Borges	Biofísica, Bioquímica, Farmacologia, Fisiologia e Neurociências	Life Sciences
30-60 thousand Brazilian reais	Male	Helio Cesar Salgado	Biofísica, Bioquímica, Farmacologia, Fisiologia e Neurociências	Life Sciences
30-60 thousand Brazilian reais	Female	Valdirene Moreira Gomes	Biofísica, Bioquímica, Farmacologia, Fisiologia e Neurociências	Life Sciences
30-60 thousand Brazilian reais	Female	Debora Foguel	Biofísica, Bioquímica, Farmacologia, Fisiologia e Neurociências	Life Sciences
30-60 thousand Brazilian reais	Female	Maria Cristina dos Santos	Biofísica, Bioquímica, Farmacologia, Fisiologia e Neurociências	Life Sciences
30-60 thousand Brazilian reais	Male	Jamil Assreuy Filho	Biofísica, Bioquímica, Farmacologia, Fisiologia e Neurociências	Life Sciences
30-60 thousand Brazilian reais	Male	Ricardo Mauricio Xavier Leao	Biofísica, Bioquímica, Farmacologia, Fisiologia e Neurociências	Life Sciences
30-60 thousand Brazilian reais	Female	Geanne Matos de Andrade	Biofísica, Bioquímica, Farmacologia, Fisiologia e Neurociências	Life Sciences
30-60 thousand Brazilian reais	Female	Rose Adele Monteiro	Biofísica, Bioquímica, Farmacologia, Fisiologia e Neurociências	Life Sciences
30-60 thousand Brazilian reais	Male	Bruno Lourenço Diaz	Biofísica, Bioquímica, Farmacologia, Fisiologia e Neurociências	Life Sciences
30-60 thousand Brazilian reais	Female	Nylane Maria Nunes de Alencar	Biofísica, Bioquímica, Farmacologia, Fisiologia e Neurociências	Life Sciences
30-60 thousand Brazilian reais	Male	Robson de Queiroz Monteiro	Biofísica, Bioquímica, Farmacologia, Fisiologia e Neurociências	Life Sciences
30-60 thousand Brazilian reais	Male	Fernando Garcia de Mello	Biofísica, Bioquímica, Farmacologia, Fisiologia e Neurociências	Life Sciences
30-60 thousand Brazilian reais	Male	Mohammed Saad Lahlou	Biofísica, Bioquímica, Farmacologia, Fisiologia e Neurociências	Life Sciences
30-60 thousand Brazilian reais	Male	Marcelo Farina	Biofísica, Bioquímica, Farmacologia, Fisiologia e Neurociências	Life Sciences
30-60 thousand Brazilian reais	Male	Luciano Paulino da Silva	Biofísica, Bioquímica, Farmacologia, Fisiologia e Neurociências	Life Sciences
30-60 thousand Brazilian reais	Male	Christopher Kushmerick	Biofísica, Bioquímica, Farmacologia, Fisiologia e Neurociências	Life Sciences
30-60 thousand Brazilian reais	Male	Silvio Marques Zanata	Biofísica, Bioquímica, Farmacologia, Fisiologia e Neurociências	Life Sciences
30-60 thousand Brazilian reais	Female	Marilia Barros	Biofísica, Bioquímica, Farmacologia, Fisiologia e Neurociências	Life Sciences
30-60 thousand Brazilian reais	Female	Glaucia Regina Martinez	Biofísica, Bioquímica, Farmacologia, Fisiologia e Neurociências	Life Sciences
30-60 thousand Brazilian reais	Male	José María Monserrat	Biofísica, Bioquímica, Farmacologia, Fisiologia e Neurociências	Life Sciences
30-60 thousand Brazilian reais	Female	Alicia Juliana Kowaltowski	Biofísica, Bioquímica, Farmacologia, Fisiologia e Neurociências	Life Sciences
30-60 thousand Brazilian reais	Male	Alexander Henning Ulrich	Biofísica, Bioquímica, Farmacologia, Fisiologia e Neurociências	Life Sciences
30-60 thousand Brazilian reais	Male	Marcelo Marcos Morales	Biofísica, Bioquímica, Farmacologia, Fisiologia e Neurociências	Life Sciences
30-60 thousand Brazilian reais	Male	Anderson José Ferreira	Biofísica, Bioquímica, Farmacologia, Fisiologia e Neurociências	Life Sciences
30-60 thousand Brazilian reais	Male	Thiago dos Santos Moreira	Biofísica, Bioquímica, Farmacologia, Fisiologia e Neurociências	Life Sciences
30-60 thousand Brazilian reais	Female	Katya Vianna Rigatto	Biofísica, Bioquímica, Farmacologia, Fisiologia e Neurociências	Life Sciences
30-60 thousand Brazilian reais	Female	Camila Squarzoni Dale	Biofísica, Bioquímica, Farmacologia, Fisiologia e Neurociências	Life Sciences
30-60 thousand Brazilian reais	Female	Elizabeth Soares Fernandes	Biofísica, Bioquímica, Farmacologia, Fisiologia e Neurociências	Life Sciences
30-60 thousand Brazilian reais	Female	Ana Quênia Gomes da Silva	Biofísica, Bioquímica, Farmacologia, Fisiologia e Neurociências	Life Sciences
30-60 thousand Brazilian reais	Male	Gustavo Costa Bressan	Biofísica, Bioquímica, Farmacologia, Fisiologia e Neurociências	Life Sciences
30-60 thousand Brazilian reais	Male	Manoel Odorico de Moraes Filho	Biofísica, Bioquímica, Farmacologia, Fisiologia e Neurociências	Life Sciences
30-60 thousand Brazilian reais	Male	Rui Daniel Schröder Prediger	Biofísica, Bioquímica, Farmacologia, Fisiologia e Neurociências	Life Sciences
30-60 thousand Brazilian reais	Male	Cândido Celso Coimbra	Biofísica, Bioquímica, Farmacologia, Fisiologia e Neurociências	Life Sciences
30-60 thousand Brazilian reais	Male	Francisco Silveira Guimaraes	Biofísica, Bioquímica, Farmacologia, Fisiologia e Neurociências	Life Sciences
30-60 thousand Brazilian reais	Male	Hugo Alexandre de Oliveira Rocha	Biofísica, Bioquímica, Farmacologia, Fisiologia e Neurociências	Life Sciences
30-60 thousand Brazilian reais	Male	Raghuvir Krishnaswamy Arni	Biofísica, Bioquímica, Farmacologia, Fisiologia e Neurociências	Life Sciences
30-60 thousand Brazilian reais	Female	Lisiane de Oliveira Porciúncula	Biofísica, Bioquímica, Farmacologia, Fisiologia e Neurociências	Life Sciences
30-60 thousand Brazilian reais	Male	Paulo Antonio de Souza Mourao	Biofísica, Bioquímica, Farmacologia, Fisiologia e Neurociências	Life Sciences
30-60 thousand Brazilian reais	Female	Carmen Veríssima Ferreira	Biofísica, Bioquímica, Farmacologia, Fisiologia e Neurociências	Life Sciences
30-60 thousand Brazilian reais	Female	Sandra Helena Poliselli Farsky	Biofísica, Bioquímica, Farmacologia, Fisiologia e Neurociências	Life Sciences
30-60 thousand Brazilian reais	Female	Maria Tereza dos Santos Correia	Biofísica, Bioquímica, Farmacologia, Fisiologia e Neurociências	Life Sciences
30-60 thousand Brazilian reais	Male	Jose Henrique Leal-Cardoso	Biofísica, Bioquímica, Farmacologia, Fisiologia e Neurociências	Life Sciences
30-60 thousand Brazilian reais	Male	Luiz Roberto Giorgetti de Britto	Biofísica, Bioquímica, Farmacologia, Fisiologia e Neurociências	Life Sciences
30-60 thousand Brazilian reais	Male	Igor Dimitri Gama Duarte	Biofísica, Bioquímica, Farmacologia, Fisiologia e Neurociências	Life Sciences
30-60 thousand Brazilian reais	Male	Nilberto Robson Falcão do Nascimento	Biofísica, Bioquímica, Farmacologia, Fisiologia e Neurociências	Life Sciences
30-60 thousand Brazilian reais	Male	Dilson Silva dos Santos	Engenharia de Minas, Metalúrgica e de Materiais	Exact Sciences
30-60 thousand Brazilian reais	Male	Carlos Adolpho Magalhães Baltar	Engenharia de Minas, Metalúrgica e de Materiais	Exact Sciences
30-60 thousand Brazilian reais	Male	Carlos Roberto Grandini	Engenharia de Minas, Metalúrgica e de Materiais	Exact Sciences
30-60 thousand Brazilian reais	Male	Alexandre Malta Rossi	Engenharia de Minas, Metalúrgica e de Materiais	Exact Sciences
30-60 thousand Brazilian reais	Female	Isolda Costa	Engenharia de Minas, Metalúrgica e de Materiais	Exact Sciences
30-60 thousand Brazilian reais	Male	Marcelo Silveira Rabello	Engenharia de Minas, Metalúrgica e de Materiais	Exact Sciences
30-60 thousand Brazilian reais	Male	Ademir José Zattera	Engenharia de Minas, Metalúrgica e de Materiais	Exact Sciences
30-60 thousand Brazilian reais	Male	Rui Carlos Barros da Silva	Engenharia de Minas, Metalúrgica e de Materiais	Exact Sciences
30-60 thousand Brazilian reais	Male	Marcio Luis Ferreira Nascimento	Engenharia de Minas, Metalúrgica e de Materiais	Exact Sciences
30-60 thousand Brazilian reais	Male	Carlos Otavio Petter	Engenharia de Minas, Metalúrgica e de Materiais	Exact Sciences
30-60 thousand Brazilian reais	Male	Alexandre Zirpoli Simões	Engenharia de Minas, Metalúrgica e de Materiais	Exact Sciences
30-60 thousand Brazilian reais	Male	José Eduardo Spinelli	Engenharia de Minas, Metalúrgica e de Materiais	Exact Sciences
30-60 thousand Brazilian reais	Male	Humberto Naoyuki Yoshimura	Engenharia de Minas, Metalúrgica e de Materiais	Exact Sciences
30-60 thousand Brazilian reais	Male	Cláudio Alves de Siqueira Filho	Engenharia de Minas, Metalúrgica e de Materiais	Exact Sciences
30-60 thousand Brazilian reais	Female	Ana Sofia Clímaco Monteiro de Oliveira	Engenharia de Minas, Metalúrgica e de Materiais	Exact Sciences
30-60 thousand Brazilian reais	Female	Maria Rita de Morais Chaves Santos	Engenharia de Minas, Metalúrgica e de Materiais	Exact Sciences
30-60 thousand Brazilian reais	Female	Maria Ines Bruno Tavares	Engenharia de Minas, Metalúrgica e de Materiais	Exact Sciences
30-60 thousand Brazilian reais	Male	Sandro Griza	Engenharia de Minas, Metalúrgica e de Materiais	Exact Sciences
30-60 thousand Brazilian reais	Male	Laécio Santos Cavalcante	Engenharia de Minas, Metalúrgica e de Materiais	Exact Sciences
30-60 thousand Brazilian reais	Male	Caio Marcio Paranhos da Silva	Engenharia de Minas, Metalúrgica e de Materiais	Exact Sciences
30-60 thousand Brazilian reais	Female	Maria Aparecida Zaghete Bertochi	Engenharia de Minas, Metalúrgica e de Materiais	Exact Sciences
30-60 thousand Brazilian reais	Female	Eliana Navarro dos Santos Muccillo	Engenharia de Minas, Metalúrgica e de Materiais	Exact Sciences
30-60 thousand Brazilian reais	Male	Hugo Marcelo Veit	Engenharia de Minas, Metalúrgica e de Materiais	Exact Sciences
30-60 thousand Brazilian reais	Female	Sonia Regina Homem de Mello Castanho	Engenharia de Minas, Metalúrgica e de Materiais	Exact Sciences
30-60 thousand Brazilian reais	Male	José de los Santos Guerra	Engenharia de Minas, Metalúrgica e de Materiais	Exact Sciences
30-60 thousand Brazilian reais	Female	Edna Lucia Oliveira da Cunha Lima	Desenho Industrial	Exact Sciences
30-60 thousand Brazilian reais	Female	Virginia Pereira Cavalcanti	Desenho Industrial	Exact Sciences
30-60 thousand Brazilian reais	Male	Fábio Gonçalves Teixeira	Desenho Industrial	Exact Sciences
30-60 thousand Brazilian reais	Male	George Alexandre DosReis	Imunologia	Life Sciences
30-60 thousand Brazilian reais	Female	Vera Lucia Garcia Calich	Imunologia	Life Sciences
30-60 thousand Brazilian reais	Female	Leda Quercia Vieira	Imunologia	Life Sciences
30-60 thousand Brazilian reais	Female	Sonia Jancar Negro	Imunologia	Life Sciences
30-60 thousand Brazilian reais	Female	Joseli Lannes-Vieira	Imunologia	Life Sciences
30-60 thousand Brazilian reais	Female	Cristina Beatriz Cazabuena Bonorino	Imunologia	Life Sciences
30-60 thousand Brazilian reais	Female	Alexandra Ivo de Medeiros	Imunologia	Life Sciences
30-60 thousand Brazilian reais	Female	Camila Indiani de Oliveira	Imunologia	Life Sciences
30-60 thousand Brazilian reais	Male	Momtchilo Russo	Imunologia	Life Sciences
30-60 thousand Brazilian reais	Female	Virginia Maria Barros de Lorena	Imunologia	Life Sciences
30-60 thousand Brazilian reais	Female	Ana Maria Caetano de Faria	Imunologia	Life Sciences
30-60 thousand Brazilian reais	Male	Américo Scotti	Engenharia Mecânica, Naval e Oceânica e Aeroespacial	Exact Sciences
30-60 thousand Brazilian reais	Male	Argemiro Soares da Silva Sobrinho	Engenharia Mecânica, Naval e Oceânica e Aeroespacial	Exact Sciences
30-60 thousand Brazilian reais	Male	Noé Cheung	Engenharia Mecânica, Naval e Oceânica e Aeroespacial	Exact Sciences
30-60 thousand Brazilian reais	Male	Jorge Luiz de Almeida Ferreira	Engenharia Mecânica, Naval e Oceânica e Aeroespacial	Exact Sciences
30-60 thousand Brazilian reais	Male	Antonio André Novotny	Engenharia Mecânica, Naval e Oceânica e Aeroespacial	Exact Sciences
30-60 thousand Brazilian reais	Male	Carlos José de Araújo	Engenharia Mecânica, Naval e Oceânica e Aeroespacial	Exact Sciences
30-60 thousand Brazilian reais	Female	Cristiane Aparecida Martins	Engenharia Mecânica, Naval e Oceânica e Aeroespacial	Exact Sciences
30-60 thousand Brazilian reais	Male	Ronilson Rocha	Engenharia Mecânica, Naval e Oceânica e Aeroespacial	Exact Sciences
30-60 thousand Brazilian reais	Male	Christian Johann Losso Hermes	Engenharia Mecânica, Naval e Oceânica e Aeroespacial	Exact Sciences
30-60 thousand Brazilian reais	Male	Rogério Gomes de Oliveira	Engenharia Mecânica, Naval e Oceânica e Aeroespacial	Exact Sciences
30-60 thousand Brazilian reais	Male	Luciano Luporini Menegaldo	Engenharia Mecânica, Naval e Oceânica e Aeroespacial	Exact Sciences
30-60 thousand Brazilian reais	Female	Maira Martins da Silva	Engenharia Mecânica, Naval e Oceânica e Aeroespacial	Exact Sciences
30-60 thousand Brazilian reais	Male	Roney Leon Thompson	Engenharia Mecânica, Naval e Oceânica e Aeroespacial	Exact Sciences
30-60 thousand Brazilian reais	Male	Theophilo Moura Maciel	Engenharia Mecânica, Naval e Oceânica e Aeroespacial	Exact Sciences
30-60 thousand Brazilian reais	Male	Louriel Oliveira Vilarinho	Engenharia Mecânica, Naval e Oceânica e Aeroespacial	Exact Sciences
30-60 thousand Brazilian reais	Male	Getúlio de Vasconcelos	Engenharia Mecânica, Naval e Oceânica e Aeroespacial	Exact Sciences
30-60 thousand Brazilian reais	Female	Rita Karolinny Chaves de Lima	Engenharia Mecânica, Naval e Oceânica e Aeroespacial	Exact Sciences
30-60 thousand Brazilian reais	Male	Paulo César Soares Júnior	Engenharia Mecânica, Naval e Oceânica e Aeroespacial	Exact Sciences
30-60 thousand Brazilian reais	Female	Carolina Palma Naveira Cotta	Engenharia Mecânica, Naval e Oceânica e Aeroespacial	Exact Sciences
30-60 thousand Brazilian reais	Male	Emílio Carlos Nelli Silva	Engenharia Mecânica, Naval e Oceânica e Aeroespacial	Exact Sciences
30-60 thousand Brazilian reais	Male	Jerson Rogério Pinheiro Vaz	Engenharia Mecânica, Naval e Oceânica e Aeroespacial	Exact Sciences
30-60 thousand Brazilian reais	Female	Jocelia Grazia	Zoologia	Life Sciences
30-60 thousand Brazilian reais	Male	Luiz Roberto Malabarba	Zoologia	Life Sciences
30-60 thousand Brazilian reais	Female	Angelica Maria Penteado Martins Dias	Zoologia	Life Sciences
30-60 thousand Brazilian reais	Male	Jose Maurício Barbanti Duarte	Zoologia	Life Sciences
30-60 thousand Brazilian reais	Male	Jose Eduardo Serrao	Zoologia	Life Sciences
30-60 thousand Brazilian reais	Male	Carlos Eduardo Lustosa Esbérard	Zoologia	Life Sciences
30-60 thousand Brazilian reais	Male	Adalberto José dos Santos	Zoologia	Life Sciences
30-60 thousand Brazilian reais	Male	Rômulo Romeu da Nóbrega Alves	Zoologia	Life Sciences
30-60 thousand Brazilian reais	Male	Adriano Brilhante Kury	Zoologia	Life Sciences
30-60 thousand Brazilian reais	Female	Daniela Maeda Takiya	Zoologia	Life Sciences
30-60 thousand Brazilian reais	Male	Eduardo Carlos Meduna Hajdu	Zoologia	Life Sciences
30-60 thousand Brazilian reais	Male	Luciano Nicolás Naka	Zoologia	Life Sciences
30-60 thousand Brazilian reais	Male	Paulo Gustavo Homem Passos	Zoologia	Life Sciences
30-60 thousand Brazilian reais	Male	Celio Fernando Baptista Haddad	Zoologia	Life Sciences
30-60 thousand Brazilian reais	Female	Ieda Maria Alves	Letras e Lingüística	Humanities
30-60 thousand Brazilian reais	Female	Beatriz Vieira de Resende	Letras e Lingüística	Humanities
30-60 thousand Brazilian reais	Male	Jan Edson Rodrigues Leite	Letras e Lingüística	Humanities
30-60 thousand Brazilian reais	Female	Maria Jose Bocorny Finatto	Letras e Lingüística	Humanities
30-60 thousand Brazilian reais	Female	Aparecida Negri Isquerdo	Letras e Lingüística	Humanities
30-60 thousand Brazilian reais	Female	Ildney de Fátima Souza Cavalcanti	Letras e Lingüística	Humanities
30-60 thousand Brazilian reais	Female	Marie Helene Catherine Torres	Letras e Lingüística	Humanities
30-60 thousand Brazilian reais	Female	Vera Lúcia Santiago Araújo	Letras e Lingüística	Humanities
30-60 thousand Brazilian reais	Male	Tiago Timponi Torrent	Letras e Lingüística	Humanities
30-60 thousand Brazilian reais	Male	Dan Marchesin	Matemática e Estatística	Exact Sciences
30-60 thousand Brazilian reais	Male	Abramo Hefez	Matemática e Estatística	Exact Sciences
30-60 thousand Brazilian reais	Male	Claudio Landim	Matemática e Estatística	Exact Sciences
30-60 thousand Brazilian reais	Male	Hilário Alencar da Silva	Matemática e Estatística	Exact Sciences
30-60 thousand Brazilian reais	Male	Enrique Ramiro Pujals	Matemática e Estatística	Exact Sciences
30-60 thousand Brazilian reais	Male	Fernando Codá dos Santos Cavalcanti Marques	Matemática e Estatística	Exact Sciences
30-60 thousand Brazilian reais	Male	Vitor Domingos Martins de Araujo	Matemática e Estatística	Exact Sciences
30-60 thousand Brazilian reais	Male	Eduardo Vasconcelos Oliveira Teixeira	Matemática e Estatística	Exact Sciences
30-60 thousand Brazilian reais	Male	Daniel Marinho Pellegrino	Matemática e Estatística	Exact Sciences
30-60 thousand Brazilian reais	Female	Irina Sviridova	Matemática e Estatística	Exact Sciences
30-60 thousand Brazilian reais	Female	Maria Eulalia Vares	Matemática e Estatística	Exact Sciences
30-60 thousand Brazilian reais	Male	Jose Felipe Linares Ramirez	Matemática e Estatística	Exact Sciences
30-60 thousand Brazilian reais	Female	Lúcia Maria Bastos Pereira das Neves	História	Humanities
30-60 thousand Brazilian reais	Male	Gilmar Arruda	História	Humanities
30-60 thousand Brazilian reais	Male	Luís Reznik	História	Humanities
30-60 thousand Brazilian reais	Male	Álvaro Pereira do Nascimento	História	Humanities
30-60 thousand Brazilian reais	Female	Marluza Marques Harres	História	Humanities
30-60 thousand Brazilian reais	Male	Ivan de Andrade Vellasco	História	Humanities
30-60 thousand Brazilian reais	Female	Cristina Scheibe Wolff	História	Humanities
30-60 thousand Brazilian reais	Female	Iara Lis Franco Schiavinatto	História	Humanities
30-60 thousand Brazilian reais	Male	Neimar Machado de Sousa	História	Humanities
30-60 thousand Brazilian reais	Male	Antônio Carlos Moraes Lessa	História	Humanities
30-60 thousand Brazilian reais	Female	Dorila Piló Veloso	Química	Exact Sciences
30-60 thousand Brazilian reais	Male	Wagner Vilegas	Química	Exact Sciences
30-60 thousand Brazilian reais	Male	Ivano Gebhardt Rolf Gutz	Química	Exact Sciences
30-60 thousand Brazilian reais	Male	Hugo Alejandro Gallardo Olmedo	Química	Exact Sciences
30-60 thousand Brazilian reais	Male	Fernando Antonio Santos Coelho	Química	Exact Sciences
30-60 thousand Brazilian reais	Male	Fernando Wypych	Química	Exact Sciences
30-60 thousand Brazilian reais	Female	Anita Jocelyne Marsaioli	Química	Exact Sciences
30-60 thousand Brazilian reais	Male	Paulo Roberto Ribeiro Costa	Química	Exact Sciences
30-60 thousand Brazilian reais	Female	Quezia Bezerra Cass	Química	Exact Sciences
30-60 thousand Brazilian reais	Male	Romeu Cardozo Rocha Filho	Química	Exact Sciences
30-60 thousand Brazilian reais	Male	Watson Loh	Química	Exact Sciences
30-60 thousand Brazilian reais	Male	Edilson Valmir Benvenutti	Química	Exact Sciences
30-60 thousand Brazilian reais	Female	Selma Elaine Mazzetto	Química	Exact Sciences
30-60 thousand Brazilian reais	Male	Éder Tadeu Gomes Cavalheiro	Química	Exact Sciences
30-60 thousand Brazilian reais	Male	Valfredo Azevedo Lemos	Química	Exact Sciences
30-60 thousand Brazilian reais	Male	Matthieu Tubino	Química	Exact Sciences
30-60 thousand Brazilian reais	Male	Ricardo Jorgensen Cassella	Química	Exact Sciences
30-60 thousand Brazilian reais	Male	Italo Odone Mazali	Química	Exact Sciences
30-60 thousand Brazilian reais	Female	Otília Deusdênia Loiola Pessoa	Química	Exact Sciences
30-60 thousand Brazilian reais	Male	Carlos Kleber Zago de Andrade	Química	Exact Sciences
30-60 thousand Brazilian reais	Male	Aldo Jose Gorgatti Zarbin	Química	Exact Sciences
30-60 thousand Brazilian reais	Male	Luis Henrique Mendes da Silva	Química	Exact Sciences
30-60 thousand Brazilian reais	Male	Walter Nei Lopes dos Santos	Química	Exact Sciences
30-60 thousand Brazilian reais	Female	Gisele Olímpio da Rocha	Química	Exact Sciences
30-60 thousand Brazilian reais	Female	Dulce Helena Siqueira Silva	Química	Exact Sciences
30-60 thousand Brazilian reais	Male	Robert Alan Burrow	Química	Exact Sciences
30-60 thousand Brazilian reais	Female	Sílvia Cláudia Loureiro Dias	Química	Exact Sciences
30-60 thousand Brazilian reais	Female	Márcia Messias da Silva	Química	Exact Sciences
30-60 thousand Brazilian reais	Male	Leandro Machado de Carvalho	Química	Exact Sciences
30-60 thousand Brazilian reais	Female	Giovanna Machado	Química	Exact Sciences
30-60 thousand Brazilian reais	Male	Leonardo Sena Gomes Teixeira	Química	Exact Sciences
30-60 thousand Brazilian reais	Male	Antonio Gilberto Ferreira	Química	Exact Sciences
30-60 thousand Brazilian reais	Male	Adailton João Bortoluzzi	Química	Exact Sciences
30-60 thousand Brazilian reais	Male	José Walkimar de Mesquita Carneiro	Química	Exact Sciences
30-60 thousand Brazilian reais	Male	Vitor Francisco Ferreira	Química	Exact Sciences
30-60 thousand Brazilian reais	Female	Regina Celia Monteiro de Paula	Química	Exact Sciences
30-60 thousand Brazilian reais	Male	Hélio Anderson Duarte	Química	Exact Sciences
30-60 thousand Brazilian reais	Male	Joao Batista Fernandes	Química	Exact Sciences
30-60 thousand Brazilian reais	Male	Fábio Andrei Duarte	Química	Exact Sciences
30-60 thousand Brazilian reais	Male	Ivo Milton Raimundo Junior	Química	Exact Sciences
30-60 thousand Brazilian reais	Female	Maria do Carmo Ruaro Peralba	Química	Exact Sciences
30-60 thousand Brazilian reais	Male	Mario Puiatti	Agronomia	Life Sciences
30-60 thousand Brazilian reais	Male	Celso Aita	Agronomia	Life Sciences
30-60 thousand Brazilian reais	Male	Magno Antonio Patto Ramalho	Agronomia	Life Sciences
30-60 thousand Brazilian reais	Male	Rovilson Jose de Souza	Agronomia	Life Sciences
30-60 thousand Brazilian reais	Male	José da Cruz Machado	Agronomia	Life Sciences
30-60 thousand Brazilian reais	Male	João Kaminski	Agronomia	Life Sciences
30-60 thousand Brazilian reais	Male	Valdemar Luiz Tornisielo	Agronomia	Life Sciences
30-60 thousand Brazilian reais	Male	José Oswaldo Siqueira	Agronomia	Life Sciences
30-60 thousand Brazilian reais	Male	Nairam Félix de Barros	Agronomia	Life Sciences
30-60 thousand Brazilian reais	Male	Robert Michael Boddey	Agronomia	Life Sciences
30-60 thousand Brazilian reais	Male	Raimundo Santos Barros	Agronomia	Life Sciences
30-60 thousand Brazilian reais	Female	Regina Maria Dechechi Gomes Carneiro	Agronomia	Life Sciences
30-60 thousand Brazilian reais	Male	Rubens Onofre Nodari	Agronomia	Life Sciences
30-60 thousand Brazilian reais	Male	Juvenil Enrique Cares	Agronomia	Life Sciences
30-60 thousand Brazilian reais	Male	Fernando Teixeira Nicoloso	Agronomia	Life Sciences
30-60 thousand Brazilian reais	Male	Wilson Barbosa	Agronomia	Life Sciences
30-60 thousand Brazilian reais	Male	Henrique Pereira dos Santos	Agronomia	Life Sciences
30-60 thousand Brazilian reais	Male	Joaquim Gonçalves Machado Neto	Agronomia	Life Sciences
30-60 thousand Brazilian reais	Female	Arminda Moreira de Carvalho	Agronomia	Life Sciences
30-60 thousand Brazilian reais	Female	Priscylla Ferraz Câmara Monteiro	Agronomia	Life Sciences
30-60 thousand Brazilian reais	Male	Jose Ricardo Peixoto	Agronomia	Life Sciences
30-60 thousand Brazilian reais	Male	Eduardo Seiti Gomide Mizubuti	Agronomia	Life Sciences
30-60 thousand Brazilian reais	Female	Roberta Sales Guedes	Agronomia	Life Sciences
30-60 thousand Brazilian reais	Male	Luís Reynaldo Ferracciú Alleoni	Agronomia	Life Sciences
30-60 thousand Brazilian reais	Male	Marcelo Coutinho Picanço	Agronomia	Life Sciences
30-60 thousand Brazilian reais	Female	Poliane Alfenas Zerbini	Agronomia	Life Sciences
30-60 thousand Brazilian reais	Male	Luis Francisco Angeli Alves	Agronomia	Life Sciences
30-60 thousand Brazilian reais	Male	Aureo Eduardo Magalhães Ribeiro	Agronomia	Life Sciences
30-60 thousand Brazilian reais	Male	Antonio Ricardo Panizzi	Agronomia	Life Sciences
30-60 thousand Brazilian reais	Male	Fabio Lopes Olivares	Agronomia	Life Sciences
30-60 thousand Brazilian reais	Male	Júlio Cesar Salton	Agronomia	Life Sciences
30-60 thousand Brazilian reais	Male	Ricardo Tadeu de Faria	Agronomia	Life Sciences
30-60 thousand Brazilian reais	Male	Anderson Dionei Grutzmacher	Agronomia	Life Sciences
30-60 thousand Brazilian reais	Male	Paulo Vitor Dutra de Souza	Agronomia	Life Sciences
30-60 thousand Brazilian reais	Male	Leonardo Cunha Melo	Agronomia	Life Sciences
30-60 thousand Brazilian reais	Male	Geraldo César de Oliveira	Agronomia	Life Sciences
30-60 thousand Brazilian reais	Male	João Carlos de Moraes Sá	Agronomia	Life Sciences
30-60 thousand Brazilian reais	Female	Claudia Fortes Ferreira	Agronomia	Life Sciences
30-60 thousand Brazilian reais	Male	Luiz Fernando Pires	Agronomia	Life Sciences
30-60 thousand Brazilian reais	Male	Fábio Luiz de Oliveira	Agronomia	Life Sciences
30-60 thousand Brazilian reais	Male	Jose Fernandes Barbosa Neto	Agronomia	Life Sciences
30-60 thousand Brazilian reais	Male	Dalvan José Reinert	Agronomia	Life Sciences
30-60 thousand Brazilian reais	Male	Mailson Monteiro do Rêgo	Agronomia	Life Sciences
30-60 thousand Brazilian reais	Male	Enio Marchesan	Agronomia	Life Sciences
30-60 thousand Brazilian reais	Male	Paulo Roberto Silva Farias	Agronomia	Life Sciences
30-60 thousand Brazilian reais	Male	Aleksander Westphal Muniz	Agronomia	Life Sciences
30-60 thousand Brazilian reais	Female	Edna Ivani Bertoncini	Agronomia	Life Sciences
30-60 thousand Brazilian reais	Male	Vicente Paulo Campos	Agronomia	Life Sciences
30-60 thousand Brazilian reais	Male	Ildon Rodrigues do Nascimento	Agronomia	Life Sciences
30-60 thousand Brazilian reais	Male	Dirceu Agostinetto	Agronomia	Life Sciences
30-60 thousand Brazilian reais	Male	Fabio Henrique Rojo Baio	Agronomia	Life Sciences
30-60 thousand Brazilian reais	Male	Italo Delalibera Júnior	Agronomia	Life Sciences
30-60 thousand Brazilian reais	Female	Maria do Carmo Lana	Agronomia	Life Sciences
30-60 thousand Brazilian reais	Male	José Eduardo Corá	Agronomia	Life Sciences
30-60 thousand Brazilian reais	Male	Edson Ampélio Pozza	Agronomia	Life Sciences
30-60 thousand Brazilian reais	Male	Elpidio Inacio Fernandes Filho	Agronomia	Life Sciences
30-60 thousand Brazilian reais	Male	Itamar Rosa Teixeira	Agronomia	Life Sciences
30-60 thousand Brazilian reais	Male	Helton Santos Pereira	Agronomia	Life Sciences
30-60 thousand Brazilian reais	Male	Rui Sales Junior	Agronomia	Life Sciences
30-60 thousand Brazilian reais	Male	Rodrigo Josemar Seminoti Jacques	Agronomia	Life Sciences
30-60 thousand Brazilian reais	Male	Fabio Ricardo Marin	Agronomia	Life Sciences
30-60 thousand Brazilian reais	Female	Rachel Passos Rezende	Agronomia	Life Sciences
30-60 thousand Brazilian reais	Male	Robert Neil Gerard Miller	Agronomia	Life Sciences
30-60 thousand Brazilian reais	Male	Leandro Eugenio Cardamone Diniz	Agronomia	Life Sciences
30-60 thousand Brazilian reais	Male	Frederico Costa Beber Vieira	Agronomia	Life Sciences
30-60 thousand Brazilian reais	Male	Paulo Jorge de Oliveira Ponte de Souza	Agronomia	Life Sciences
30-60 thousand Brazilian reais	Male	Renato Vasconcelos Botelho	Agronomia	Life Sciences
30-60 thousand Brazilian reais	Male	Everardo Valadares de Sa Barretto Sampaio	Agronomia	Life Sciences
30-60 thousand Brazilian reais	Male	Thieres George Freire da Silva	Agronomia	Life Sciences
30-60 thousand Brazilian reais	Male	Marcelo Ehlers Loureiro	Agronomia	Life Sciences
30-60 thousand Brazilian reais	Male	Davi José Silva	Agronomia	Life Sciences
30-60 thousand Brazilian reais	Male	Manoel Guedes Correa Gondim Junior	Agronomia	Life Sciences
30-60 thousand Brazilian reais	Male	Jerri Édson Zilli	Agronomia	Life Sciences
30-60 thousand Brazilian reais	Female	Rose Gomes Monnerat Solon de Pontes	Agronomia	Life Sciences
30-60 thousand Brazilian reais	Male	Luiz Antonio Maffia	Agronomia	Life Sciences
30-60 thousand Brazilian reais	Male	Francisco Rodrigues Freire Filho	Agronomia	Life Sciences
30-60 thousand Brazilian reais	Male	Telmo Jorge Carneiro Amado	Agronomia	Life Sciences
30-60 thousand Brazilian reais	Female	Terezinha de Jesus Rangel Camara	Agronomia	Life Sciences
30-60 thousand Brazilian reais	Female	Maria das Gracas Cardoso	Agronomia	Life Sciences
30-60 thousand Brazilian reais	Female	Luciane Vilela Resende	Agronomia	Life Sciences
30-60 thousand Brazilian reais	Female	Madelaine Venzon	Agronomia	Life Sciences
30-60 thousand Brazilian reais	Male	Marcos Gervasio Pereira	Agronomia	Life Sciences
30-60 thousand Brazilian reais	Female	Edila Vilela de Resende Von Pinho	Agronomia	Life Sciences
30-60 thousand Brazilian reais	Female	Maria Carolina Blassioli Moraes	Agronomia	Life Sciences
30-60 thousand Brazilian reais	Male	Eduardo Guimarães Couto	Agronomia	Life Sciences
30-60 thousand Brazilian reais	Male	Fábio Bueno dos Reis Junior	Agronomia	Life Sciences
30-60 thousand Brazilian reais	Male	Paulo da Cunha Lana	Oceanografia	Exact Sciences
30-60 thousand Brazilian reais	Female	Andrea Santarosa Freire	Oceanografia	Exact Sciences
30-60 thousand Brazilian reais	Male	Paulo Henrique Rezende Calil	Oceanografia	Exact Sciences
30-60 thousand Brazilian reais	Male	Gilberto Fillmann	Oceanografia	Exact Sciences
30-60 thousand Brazilian reais	Male	Marcelo Cancela Lisboa Cohen	Oceanografia	Exact Sciences
30-60 thousand Brazilian reais	Male	Gilberto Menezes Amado Filho	Oceanografia	Exact Sciences
30-60 thousand Brazilian reais	Male	Ralf Schwamborn	Oceanografia	Exact Sciences
30-60 thousand Brazilian reais	Male	Camilo Dias Seabra Pereira	Oceanografia	Exact Sciences
30-60 thousand Brazilian reais	Male	Afranio Lineu Kritski	Medicina	Life Sciences
30-60 thousand Brazilian reais	Female	Euzenir Nunes Sarno	Medicina	Life Sciences
30-60 thousand Brazilian reais	Male	Mauro Batista de Morais	Medicina	Life Sciences
30-60 thousand Brazilian reais	Male	Flavio Danni Fuchs	Medicina	Life Sciences
30-60 thousand Brazilian reais	Male	Carlos Eduardo Poli de Figueiredo	Medicina	Life Sciences
30-60 thousand Brazilian reais	Female	Nadine Oliveira Clausell	Medicina	Life Sciences
30-60 thousand Brazilian reais	Male	Ricardo Machado Xavier	Medicina	Life Sciences
30-60 thousand Brazilian reais	Male	Marcos Antonio Rossi	Medicina	Life Sciences
30-60 thousand Brazilian reais	Female	Laura Bannach Jardim	Medicina	Life Sciences
30-60 thousand Brazilian reais	Female	Denise Pires de Carvalho	Medicina	Life Sciences
30-60 thousand Brazilian reais	Female	Beatriz D'Agord Schaan	Medicina	Life Sciences
30-60 thousand Brazilian reais	Male	Egberto Gaspar de Moura	Medicina	Life Sciences
30-60 thousand Brazilian reais	Male	Fernando Marcos dos Reis	Medicina	Life Sciences
30-60 thousand Brazilian reais	Female	Achilea Candida Lisboa Bittencourt	Medicina	Life Sciences
30-60 thousand Brazilian reais	Male	Sérgio Britto Garcia	Medicina	Life Sciences
30-60 thousand Brazilian reais	Male	Wilson Nadruz Junior	Medicina	Life Sciences
30-60 thousand Brazilian reais	Female	Gisele Gus Manfro	Medicina	Life Sciences
30-60 thousand Brazilian reais	Female	Carmen Silvia Passos Lima	Medicina	Life Sciences
30-60 thousand Brazilian reais	Male	Ailton de Souza Melo	Medicina	Life Sciences
30-60 thousand Brazilian reais	Female	Maria da Conceição Nascimento Pinheiro	Medicina	Life Sciences
30-60 thousand Brazilian reais	Male	Edison Capp	Medicina	Life Sciences
30-60 thousand Brazilian reais	Female	Ana Cristina Simões e Silva	Medicina	Life Sciences
30-60 thousand Brazilian reais	Male	Flavio Faloppa	Medicina	Life Sciences
30-60 thousand Brazilian reais	Female	Cristina Marta Del-Ben	Medicina	Life Sciences
30-60 thousand Brazilian reais	Male	Andrei Carvalho Sposito	Medicina	Life Sciences
30-60 thousand Brazilian reais	Male	Leonardo Antonio Mamede Zornoff	Medicina	Life Sciences
30-60 thousand Brazilian reais	Male	Matteo Baldisserotto	Medicina	Life Sciences
30-60 thousand Brazilian reais	Male	Valdir Sabbaga Amato	Medicina	Life Sciences
30-60 thousand Brazilian reais	Male	Alessandro Comarú Pasqualotto	Medicina	Life Sciences
30-60 thousand Brazilian reais	Male	Marcus Vinícius Guimarães de Lacerda	Medicina	Life Sciences
30-60 thousand Brazilian reais	Male	Antonio Lucio Teixeira Junior	Medicina	Life Sciences
30-60 thousand Brazilian reais	Male	Antonio Luiz Pinho Ribeiro	Medicina	Life Sciences
30-60 thousand Brazilian reais	Female	Raquel Ciuvalschi Maia	Medicina	Life Sciences
30-60 thousand Brazilian reais	Female	Melania Maria Ramos de Amorim	Medicina	Life Sciences
30-60 thousand Brazilian reais	Male	Marino Muxfeldt Bianchin	Medicina	Life Sciences
30-60 thousand Brazilian reais	Female	Raimunda Nonata Ribeiro Sampaio	Medicina	Life Sciences
30-60 thousand Brazilian reais	Female	Iracema de Mattos Paranhos Calderon	Medicina	Life Sciences
30-60 thousand Brazilian reais	Female	Lia Rita Azeredo Bittencourt	Medicina	Life Sciences
30-60 thousand Brazilian reais	Male	Luis Eduardo Paim Rohde	Medicina	Life Sciences
30-60 thousand Brazilian reais	Male	Daniel Abensur Athanazio	Medicina	Life Sciences
30-60 thousand Brazilian reais	Male	Luiz Eduardo Coelho Andrade	Medicina	Life Sciences
30-60 thousand Brazilian reais	Male	Jaderson Costa da Costa	Medicina	Life Sciences
30-60 thousand Brazilian reais	Female	Ida Vanessa Doederlein Schwartz	Medicina	Life Sciences
30-60 thousand Brazilian reais	Male	Ubirajara de Oliveira Barroso Júnior	Medicina	Life Sciences
30-60 thousand Brazilian reais	Female	Cleusa Yoshiko Nagamachi	Genética	Life Sciences
30-60 thousand Brazilian reais	Female	Maria Isabel de Souza Aranha Melaragno	Genética	Life Sciences
30-60 thousand Brazilian reais	Male	Horacio Schneider	Genética	Life Sciences
30-60 thousand Brazilian reais	Female	Maria Helena Bodanese Zanettini	Genética	Life Sciences
30-60 thousand Brazilian reais	Male	Amilcar Tanuri	Genética	Life Sciences
30-60 thousand Brazilian reais	Female	Maria Luiza Silveira Mello	Genética	Life Sciences
30-60 thousand Brazilian reais	Male	Paulo Cavalcanti Gomes Ferreira	Genética	Life Sciences
30-60 thousand Brazilian reais	Male	Nilson Ivo Tonin Zanchin	Genética	Life Sciences
30-60 thousand Brazilian reais	Male	Aguinaldo Luiz Simões	Genética	Life Sciences
30-60 thousand Brazilian reais	Female	Maria Lígia Rodrigues Macedo	Genética	Life Sciences
30-60 thousand Brazilian reais	Male	Jose Artur Bogo Chies	Genética	Life Sciences
30-60 thousand Brazilian reais	Male	Claiton Henrique Dotto Bau	Genética	Life Sciences
30-60 thousand Brazilian reais	Female	Andrea Pedrosa Harand	Genética	Life Sciences
30-60 thousand Brazilian reais	Male	Eduardo Eizirik	Genética	Life Sciences
30-60 thousand Brazilian reais	Male	Thiago Bruce Rodrigues	Genética	Life Sciences
30-60 thousand Brazilian reais	Male	Augusto Schrank	Genética	Life Sciences
30-60 thousand Brazilian reais	Female	Anete Pereira de Souza	Genética	Life Sciences
30-60 thousand Brazilian reais	Male	Eduardo Martín Tarazona Santos	Genética	Life Sciences
30-60 thousand Brazilian reais	Female	Irina Kerkis	Genética	Life Sciences
30-60 thousand Brazilian reais	Male	Rommel Mario Rodríguez Burbano	Genética	Life Sciences
30-60 thousand Brazilian reais	Female	Ilce Mara de Syllos Cólus	Genética	Life Sciences
30-60 thousand Brazilian reais	Female	Maria do Carmo de Freire Bastos	Genética	Life Sciences
30-60 thousand Brazilian reais	Female	Maria Cátira Bortolini	Genética	Life Sciences
30-60 thousand Brazilian reais	Female	Daisy Maria Favero Salvadori	Genética	Life Sciences
30-60 thousand Brazilian reais	Female	Sidney Emanuel Batista dos Santos	Genética	Life Sciences
< 30 thousand Brazilian reais	Female	Bertha Koiffmann Becker	Arquitetura, Demografia, Geografia	Humanities
< 30 thousand Brazilian reais	Female	Lucia Maria Machado Bógus	Arquitetura, Demografia, Geografia	Humanities
< 30 thousand Brazilian reais	Male	Luiz Cesar de Queiroz Ribeiro	Arquitetura, Demografia, Geografia	Humanities
< 30 thousand Brazilian reais	Female	Maria Encarnação Beltrão Sposito	Arquitetura, Demografia, Geografia	Humanities
< 30 thousand Brazilian reais	Male	Claudio Antonio Goncalves Egler	Arquitetura, Demografia, Geografia	Humanities
< 30 thousand Brazilian reais	Male	Edson da Cunha Mahfuz	Arquitetura, Demografia, Geografia	Humanities
< 30 thousand Brazilian reais	Male	Oswaldo Mario Serra Truzzi	Arquitetura, Demografia, Geografia	Humanities
< 30 thousand Brazilian reais	Male	Eliseu Savério Sposito	Arquitetura, Demografia, Geografia	Humanities
< 30 thousand Brazilian reais	Female	Jupira Gomes de Mendonça	Arquitetura, Demografia, Geografia	Humanities
< 30 thousand Brazilian reais	Male	Gilvan Ramalho Guedes	Arquitetura, Demografia, Geografia	Humanities
< 30 thousand Brazilian reais	Male	Paulo Cesar da Costa Gomes	Arquitetura, Demografia, Geografia	Humanities
< 30 thousand Brazilian reais	Female	Ana Lucia Nogueira de Paiva Britto	Arquitetura, Demografia, Geografia	Humanities
< 30 thousand Brazilian reais	Female	Luciana Correa do Lago	Arquitetura, Demografia, Geografia	Humanities
< 30 thousand Brazilian reais	Female	Edna Maria Furtado	Arquitetura, Demografia, Geografia	Humanities
< 30 thousand Brazilian reais	Male	Roberto Verdum	Arquitetura, Demografia, Geografia	Humanities
< 30 thousand Brazilian reais	Male	Rogério Ribeiro de Oliveira	Arquitetura, Demografia, Geografia	Humanities
< 30 thousand Brazilian reais	Female	Isa de Oliveira Rocha	Arquitetura, Demografia, Geografia	Humanities
< 30 thousand Brazilian reais	Female	Mônica dos Santos Marçal	Arquitetura, Demografia, Geografia	Humanities
< 30 thousand Brazilian reais	Female	Rosana Aparecida Baeninger	Arquitetura, Demografia, Geografia	Humanities
< 30 thousand Brazilian reais	Male	José Júlio Ferreira Lima	Arquitetura, Demografia, Geografia	Humanities
< 30 thousand Brazilian reais	Male	Antonio Nivaldo Hespanhol	Arquitetura, Demografia, Geografia	Humanities
< 30 thousand Brazilian reais	Female	Flaviana Gasparotti Nunes	Arquitetura, Demografia, Geografia	Humanities
< 30 thousand Brazilian reais	Female	Lilian Fessler Vaz	Arquitetura, Demografia, Geografia	Humanities
< 30 thousand Brazilian reais	Male	Odair Barbosa de Moraes	Arquitetura, Demografia, Geografia	Humanities
< 30 thousand Brazilian reais	Female	Helena Copetti Callai	Arquitetura, Demografia, Geografia	Humanities
< 30 thousand Brazilian reais	Female	Luciene Jung de Campos	Arquitetura, Demografia, Geografia	Humanities
< 30 thousand Brazilian reais	Male	Bernardo Machado Gontijo	Arquitetura, Demografia, Geografia	Humanities
< 30 thousand Brazilian reais	Male	Leonardo José Cordeiro Santos	Arquitetura, Demografia, Geografia	Humanities
< 30 thousand Brazilian reais	Male	Luiz Cruz Lima	Arquitetura, Demografia, Geografia	Humanities
< 30 thousand Brazilian reais	Female	Zilda de Fátima Mariano	Arquitetura, Demografia, Geografia	Humanities
< 30 thousand Brazilian reais	Male	Fábio Duarte de Araújo Silva	Arquitetura, Demografia, Geografia	Humanities
< 30 thousand Brazilian reais	Male	Raul Borges Guimarães	Arquitetura, Demografia, Geografia	Humanities
< 30 thousand Brazilian reais	Female	Lindijane de Souza Bento Almeida	Arquitetura, Demografia, Geografia	Humanities
< 30 thousand Brazilian reais	Female	Margareth Martha Arilha Silva	Arquitetura, Demografia, Geografia	Humanities
< 30 thousand Brazilian reais	Male	Adauto Lúcio Cardoso	Arquitetura, Demografia, Geografia	Humanities
< 30 thousand Brazilian reais	Female	Suely Maria Ribeiro Leal	Arquitetura, Demografia, Geografia	Humanities
< 30 thousand Brazilian reais	Male	Roberto Segre	Arquitetura, Demografia, Geografia	Humanities
< 30 thousand Brazilian reais	Female	Márcia da Silva	Arquitetura, Demografia, Geografia	Humanities
< 30 thousand Brazilian reais	Male	Carlos Hardt	Arquitetura, Demografia, Geografia	Humanities
< 30 thousand Brazilian reais	Female	Doralice Sátyro Maia	Arquitetura, Demografia, Geografia	Humanities
< 30 thousand Brazilian reais	Female	Maria Lucia Gondim da Rosa Oiticica	Arquitetura, Demografia, Geografia	Humanities
< 30 thousand Brazilian reais	Female	Beatriz Piccolotto Siqueira Bueno	Arquitetura, Demografia, Geografia	Humanities
< 30 thousand Brazilian reais	Male	Julio Cesar de Lima Ramires	Arquitetura, Demografia, Geografia	Humanities
< 30 thousand Brazilian reais	Male	Leonardo Marques Monteiro	Arquitetura, Demografia, Geografia	Humanities
< 30 thousand Brazilian reais	Female	Ana Silvia Volpi Scott	Arquitetura, Demografia, Geografia	Humanities
< 30 thousand Brazilian reais	Female	Roseline Vanessa Santos Oliveira	Arquitetura, Demografia, Geografia	Humanities
< 30 thousand Brazilian reais	Male	João Batista Pereira Cabral	Arquitetura, Demografia, Geografia	Humanities
< 30 thousand Brazilian reais	Male	Benhur Pinós da Costa	Arquitetura, Demografia, Geografia	Humanities
< 30 thousand Brazilian reais	Female	Maria Augusta Justi Pisani	Arquitetura, Demografia, Geografia	Humanities
< 30 thousand Brazilian reais	Male	Antonio Otaviano Vieira Junior	Arquitetura, Demografia, Geografia	Humanities
< 30 thousand Brazilian reais	Female	Patricia Regina Chaves Drach	Arquitetura, Demografia, Geografia	Humanities
< 30 thousand Brazilian reais	Female	Christiane Senhorinha Soares Campos	Arquitetura, Demografia, Geografia	Humanities
< 30 thousand Brazilian reais	Male	Marcelo de Souza Bispo	Arquitetura, Demografia, Geografia	Humanities
< 30 thousand Brazilian reais	Male	Manoel do Couto Fernandes	Arquitetura, Demografia, Geografia	Humanities
< 30 thousand Brazilian reais	Male	Bruno Pucci	Educação	Humanities
< 30 thousand Brazilian reais	Female	Belmira Amélia de Barros Oliveira Bueno	Educação	Humanities
< 30 thousand Brazilian reais	Male	Wenceslau Goncalves Neto	Educação	Humanities
< 30 thousand Brazilian reais	Male	Jacques Therrien	Educação	Humanities
< 30 thousand Brazilian reais	Male	Sadao Omote	Educação	Humanities
< 30 thousand Brazilian reais	Female	Elsa Maria Mendes Pessoa Pullin	Educação	Humanities
< 30 thousand Brazilian reais	Female	Ana Lúcia Felix dos Santos	Educação	Humanities
< 30 thousand Brazilian reais	Female	Célia Frazão Soares Linhares	Educação	Humanities
< 30 thousand Brazilian reais	Female	Magda Floriana Damiani	Educação	Humanities
< 30 thousand Brazilian reais	Male	Antonio Flavio Barbosa Moreira	Educação	Humanities
< 30 thousand Brazilian reais	Male	Marcelo de Carvalho Borba	Educação	Humanities
< 30 thousand Brazilian reais	Female	Evely Boruchovitch	Educação	Humanities
< 30 thousand Brazilian reais	Female	Miriam Struchiner	Educação	Humanities
< 30 thousand Brazilian reais	Female	Marília Pinto de Carvalho	Educação	Humanities
< 30 thousand Brazilian reais	Male	Carlos Alberto Marques	Educação	Humanities
< 30 thousand Brazilian reais	Female	Maria Clara Bueno Fischer	Educação	Humanities
< 30 thousand Brazilian reais	Female	Maria Helena Menna Barreto Abrahão	Educação	Humanities
< 30 thousand Brazilian reais	Female	Isabel Cristina de Moura Carvalho	Educação	Humanities
< 30 thousand Brazilian reais	Male	Marco Antonio Barbosa Braga	Educação	Humanities
< 30 thousand Brazilian reais	Female	Sandra de Fátima Pereira Tosta	Educação	Humanities
< 30 thousand Brazilian reais	Female	Berenice Corsetti	Educação	Humanities
< 30 thousand Brazilian reais	Male	Lucidio Bianchetti	Educação	Humanities
< 30 thousand Brazilian reais	Female	Karla Schuck Saraiva	Educação	Humanities
< 30 thousand Brazilian reais	Female	Edna Maria Querido de Oliveira Chamon	Educação	Humanities
< 30 thousand Brazilian reais	Male	Mauro Cezar Coelho	Educação	Humanities
< 30 thousand Brazilian reais	Female	Sofia Lerche Vieira	Educação	Humanities
< 30 thousand Brazilian reais	Male	Hélder Ferreira Isayama	Educação	Humanities
< 30 thousand Brazilian reais	Female	Regina Luzia Corio de Buriasco	Educação	Humanities
< 30 thousand Brazilian reais	Female	Débora Pereira Laurino	Educação	Humanities
< 30 thousand Brazilian reais	Female	Joana Peixoto	Educação	Humanities
< 30 thousand Brazilian reais	Female	Nilce da Silva	Educação	Humanities
< 30 thousand Brazilian reais	Male	Carlos Henrique de Carvalho	Educação	Humanities
< 30 thousand Brazilian reais	Female	Theresa Maria de Freitas Adrião	Educação	Humanities
< 30 thousand Brazilian reais	Female	Acacia Zeneida Kuenzer	Educação	Humanities
< 30 thousand Brazilian reais	Male	Deller James Ferreira	Educação	Humanities
< 30 thousand Brazilian reais	Female	Eliane Brigida Morais Falcao	Educação	Humanities
< 30 thousand Brazilian reais	Female	Maria Arisnete Camara de Morais	Educação	Humanities
< 30 thousand Brazilian reais	Female	Heloísa Helena Pimenta Rocha	Educação	Humanities
< 30 thousand Brazilian reais	Female	Eliana Borges Correia de Albuquerque	Educação	Humanities
< 30 thousand Brazilian reais	Female	Adair Mendes Nacarato	Educação	Humanities
< 30 thousand Brazilian reais	Female	Andreia Guerra de Moraes	Educação	Humanities
< 30 thousand Brazilian reais	Female	Adair de Aguiar Neitzel	Educação	Humanities
< 30 thousand Brazilian reais	Female	Isabel Gomes Rodrigues Martins	Educação	Humanities
< 30 thousand Brazilian reais	Female	Eniceia Goncalves Mendes	Educação	Humanities
< 30 thousand Brazilian reais	Female	Sandra Lucia Escovedo Selles	Educação	Humanities
< 30 thousand Brazilian reais	Female	Doris Pires Vargas Bolzan	Educação	Humanities
< 30 thousand Brazilian reais	Male	Alexandre Fernandez Vaz	Educação	Humanities
< 30 thousand Brazilian reais	Female	Silvia Maria de Aguiar Isaia	Educação	Humanities
< 30 thousand Brazilian reais	Female	Maria Cristina Soares de Gouvea	Educação	Humanities
< 30 thousand Brazilian reais	Female	Andréa Tereza Brito Ferreira	Educação	Humanities
< 30 thousand Brazilian reais	Male	Marcus Vinicius Maltempi	Educação	Humanities
< 30 thousand Brazilian reais	Female	Wilma de Nazaré Baía Coelho	Educação	Humanities
< 30 thousand Brazilian reais	Male	Antonio Fernando Silveira Guerra	Educação	Humanities
< 30 thousand Brazilian reais	Male	Carlos Herold Junior	Educação	Humanities
< 30 thousand Brazilian reais	Female	Sonia Cristina Simões Felipeto	Educação	Humanities
< 30 thousand Brazilian reais	Male	José Fernandes Weber	Educação	Humanities
< 30 thousand Brazilian reais	Female	Norinês Panicacci Bahia	Educação	Humanities
< 30 thousand Brazilian reais	Male	Marco Antonio Ferreira da Costa	Educação	Humanities
< 30 thousand Brazilian reais	Female	Carmen Roselaine de Oliveira Farias	Educação	Humanities
< 30 thousand Brazilian reais	Female	Rosa Maria Bueno Fischer	Educação	Humanities
< 30 thousand Brazilian reais	Female	Débora Deliberato	Educação	Humanities
< 30 thousand Brazilian reais	Female	Ozerina Victor de Oliveira	Educação	Humanities
< 30 thousand Brazilian reais	Female	Giana Lange do Amaral	Educação	Humanities
< 30 thousand Brazilian reais	Female	Mailsa Carla Pinto Passos	Educação	Humanities
< 30 thousand Brazilian reais	Female	Elí Terezinha Henn Fabris	Educação	Humanities
< 30 thousand Brazilian reais	Female	Allene Carvalho Lage	Educação	Humanities
< 30 thousand Brazilian reais	Female	Dalva Maria Bianchini Bonotto	Educação	Humanities
< 30 thousand Brazilian reais	Female	Vera Maria Vidal Peroni	Educação	Humanities
< 30 thousand Brazilian reais	Female	Iranete Maria da Silva Lima	Educação	Humanities
< 30 thousand Brazilian reais	Female	Maria Cristina Lima Paniago	Educação	Humanities
< 30 thousand Brazilian reais	Male	Luis Henrique Sommer	Educação	Humanities
< 30 thousand Brazilian reais	Male	Jean Mac Cole Tavares Santos	Educação	Humanities
< 30 thousand Brazilian reais	Male	Eduardo Santos Junqueira Rodrigues	Educação	Humanities
< 30 thousand Brazilian reais	Female	Maria Isabel da Cunha	Educação	Humanities
< 30 thousand Brazilian reais	Female	Ana Beatriz Gomes Pimenta de Carvalho	Educação	Humanities
< 30 thousand Brazilian reais	Female	Fabiana de Amorim Marcello	Educação	Humanities
< 30 thousand Brazilian reais	Male	Orlando Gomes de Aguiar Júnior	Educação	Humanities
< 30 thousand Brazilian reais	Male	Alceu Gomes Alves Filho	Engenharia de Produção e de Transportes	Exact Sciences
< 30 thousand Brazilian reais	Male	Luiz Antonio Nogueira Lorena	Engenharia de Produção e de Transportes	Exact Sciences
< 30 thousand Brazilian reais	Male	Anand Subramanian	Engenharia de Produção e de Transportes	Exact Sciences
< 30 thousand Brazilian reais	Female	Lilian Markenzon	Engenharia de Produção e de Transportes	Exact Sciences
< 30 thousand Brazilian reais	Male	Antonio Fernando Branco Costa	Engenharia de Produção e de Transportes	Exact Sciences
< 30 thousand Brazilian reais	Female	Renata Raposo Del-Vecchio	Engenharia de Produção e de Transportes	Exact Sciences
< 30 thousand Brazilian reais	Male	Alexandre Xavier Martins	Engenharia de Produção e de Transportes	Exact Sciences
< 30 thousand Brazilian reais	Male	Gustavo Peixoto Silva	Engenharia de Produção e de Transportes	Exact Sciences
< 30 thousand Brazilian reais	Male	Paulo Augusto Cauchick Miguel	Engenharia de Produção e de Transportes	Exact Sciences
< 30 thousand Brazilian reais	Male	Henrique Rozenfeld	Engenharia de Produção e de Transportes	Exact Sciences
< 30 thousand Brazilian reais	Male	Leandro Chaves Rêgo	Engenharia de Produção e de Transportes	Exact Sciences
< 30 thousand Brazilian reais	Male	Denis Borenstein	Engenharia de Produção e de Transportes	Exact Sciences
< 30 thousand Brazilian reais	Male	Robinson Samuel Vieira Hoto	Engenharia de Produção e de Transportes	Exact Sciences
< 30 thousand Brazilian reais	Male	Gilberto de Miranda Junior	Engenharia de Produção e de Transportes	Exact Sciences
< 30 thousand Brazilian reais	Male	Luciano Brito Rodrigues	Engenharia de Produção e de Transportes	Exact Sciences
< 30 thousand Brazilian reais	Female	Lidia Angulo Meza	Engenharia de Produção e de Transportes	Exact Sciences
< 30 thousand Brazilian reais	Female	Denise Dumke de Medeiros	Engenharia de Produção e de Transportes	Exact Sciences
< 30 thousand Brazilian reais	Male	Carlos Henrique Pereira Mello	Engenharia de Produção e de Transportes	Exact Sciences
< 30 thousand Brazilian reais	Female	Caroline Maria de Miranda Mota	Engenharia de Produção e de Transportes	Exact Sciences
< 30 thousand Brazilian reais	Male	Leonardo Silva de Lima	Engenharia de Produção e de Transportes	Exact Sciences
< 30 thousand Brazilian reais	Male	Ricardo Saraiva de Camargo	Engenharia de Produção e de Transportes	Exact Sciences
< 30 thousand Brazilian reais	Male	Pedro Paulo Balestrassi	Engenharia de Produção e de Transportes	Exact Sciences
< 30 thousand Brazilian reais	Female	Danielle Costa Morais	Engenharia de Produção e de Transportes	Exact Sciences
< 30 thousand Brazilian reais	Male	Guilherme Luís Roehe Vaccaro	Engenharia de Produção e de Transportes	Exact Sciences
< 30 thousand Brazilian reais	Male	Thiago Alves de Queiroz	Engenharia de Produção e de Transportes	Exact Sciences
< 30 thousand Brazilian reais	Male	Fernando Augusto Silva Marins	Engenharia de Produção e de Transportes	Exact Sciences
< 30 thousand Brazilian reais	Female	Lia Buarque de Macedo Guimarães	Engenharia de Produção e de Transportes	Exact Sciences
< 30 thousand Brazilian reais	Male	Marc Roger Jean Marie Henry	Medicina Veterinária	Life Sciences
< 30 thousand Brazilian reais	Male	João Carlos Deschamps	Medicina Veterinária	Life Sciences
< 30 thousand Brazilian reais	Male	Oswaldo Durival Rossi Junior	Medicina Veterinária	Life Sciences
< 30 thousand Brazilian reais	Male	João Francisco Coelho de Oliveira	Medicina Veterinária	Life Sciences
< 30 thousand Brazilian reais	Male	Luiz Antonio Franco da Silva	Medicina Veterinária	Life Sciences
< 30 thousand Brazilian reais	Male	Sergio Carmona de Sao Clemente	Medicina Veterinária	Life Sciences
< 30 thousand Brazilian reais	Male	Renato Andreotti e Silva	Medicina Veterinária	Life Sciences
< 30 thousand Brazilian reais	Male	Jose Antonio Visintin	Medicina Veterinária	Life Sciences
< 30 thousand Brazilian reais	Male	Aldo Gava	Medicina Veterinária	Life Sciences
< 30 thousand Brazilian reais	Male	Roberto José Meyer Nascimento	Medicina Veterinária	Life Sciences
< 30 thousand Brazilian reais	Male	Antonio Flávio Medeiros Dantas	Medicina Veterinária	Life Sciences
< 30 thousand Brazilian reais	Male	Antonio Augusto Mendes Maia	Medicina Veterinária	Life Sciences
< 30 thousand Brazilian reais	Male	Claudio Lisias Mafra de Siqueira	Medicina Veterinária	Life Sciences
< 30 thousand Brazilian reais	Male	Eduardo Fernandes Bondan	Medicina Veterinária	Life Sciences
< 30 thousand Brazilian reais	Male	Eugenio Gonçalves de Araujo	Medicina Veterinária	Life Sciences
< 30 thousand Brazilian reais	Male	Jackson Victor de Araujo	Medicina Veterinária	Life Sciences
< 30 thousand Brazilian reais	Female	Maria Verônica de Souza	Medicina Veterinária	Life Sciences
< 30 thousand Brazilian reais	Male	Alexandre Moraes Pinheiro	Medicina Veterinária	Life Sciences
< 30 thousand Brazilian reais	Male	João Roberto Braga de Mello	Medicina Veterinária	Life Sciences
< 30 thousand Brazilian reais	Male	Alexandre Mazzanti	Medicina Veterinária	Life Sciences
< 30 thousand Brazilian reais	Male	Félix Hilario Diaz González	Medicina Veterinária	Life Sciences
< 30 thousand Brazilian reais	Female	Glaucia Denise Kommers	Medicina Veterinária	Life Sciences
< 30 thousand Brazilian reais	Male	Alceu Gaspar Raiser	Medicina Veterinária	Life Sciences
< 30 thousand Brazilian reais	Male	Roberto Mauricio Carvalho Guedes	Medicina Veterinária	Life Sciences
< 30 thousand Brazilian reais	Female	Beatriz Rossetti Ferreira	Medicina Veterinária	Life Sciences
< 30 thousand Brazilian reais	Male	Alceu Mezzalira	Medicina Veterinária	Life Sciences
< 30 thousand Brazilian reais	Male	Júlio Augusto Naylor Lisbôa	Medicina Veterinária	Life Sciences
< 30 thousand Brazilian reais	Male	Leoni Villano Bonamin	Medicina Veterinária	Life Sciences
< 30 thousand Brazilian reais	Male	Pierre Castro Soares	Medicina Veterinária	Life Sciences
< 30 thousand Brazilian reais	Female	Lígia Miranda Ferreira Borges	Medicina Veterinária	Life Sciences
< 30 thousand Brazilian reais	Male	Benito Soto Blanco	Medicina Veterinária	Life Sciences
< 30 thousand Brazilian reais	Female	Eliane Gonçalves de Melo	Medicina Veterinária	Life Sciences
< 30 thousand Brazilian reais	Female	Ana Paula Frederico Rodrigues Loureiro Bracarense	Medicina Veterinária	Life Sciences
< 30 thousand Brazilian reais	Male	Marcelo Emílio Beletti	Medicina Veterinária	Life Sciences
< 30 thousand Brazilian reais	Female	Mayra Elena Ortiz D' Avila Assumpcao	Medicina Veterinária	Life Sciences
< 30 thousand Brazilian reais	Female	Patrizia Ana Bricarello	Medicina Veterinária	Life Sciences
< 30 thousand Brazilian reais	Male	Artur Kanadani Campos	Medicina Veterinária	Life Sciences
< 30 thousand Brazilian reais	Male	Carlos Eduardo Ambrósio	Medicina Veterinária	Life Sciences
< 30 thousand Brazilian reais	Female	Cristiane Divan Baldani	Medicina Veterinária	Life Sciences
< 30 thousand Brazilian reais	Male	Marcelo Barbosa Bezerra	Medicina Veterinária	Life Sciences
< 30 thousand Brazilian reais	Male	Geovanni Dantas Cassali	Medicina Veterinária	Life Sciences
< 30 thousand Brazilian reais	Female	Miliane Moreira Soares de Souza	Medicina Veterinária	Life Sciences
< 30 thousand Brazilian reais	Male	Éverton Kort Kamp Fernandes	Medicina Veterinária	Life Sciences
< 30 thousand Brazilian reais	Male	Alexandre Rodrigues Silva	Medicina Veterinária	Life Sciences
< 30 thousand Brazilian reais	Male	José Augusto Bastos Afonso da Silva	Medicina Veterinária	Life Sciences
< 30 thousand Brazilian reais	Male	Augusto Schneider	Medicina Veterinária	Life Sciences
< 30 thousand Brazilian reais	Male	Arlei Marcili	Medicina Veterinária	Life Sciences
< 30 thousand Brazilian reais	Male	Abelardo Silva Júnior	Medicina Veterinária	Life Sciences
< 30 thousand Brazilian reais	Male	Frederico Ozanan Barros Monteiro	Medicina Veterinária	Life Sciences
< 30 thousand Brazilian reais	Female	Priscila Marques Moura de Leon	Medicina Veterinária	Life Sciences
< 30 thousand Brazilian reais	Male	Aleksandro Schafer da Silva	Medicina Veterinária	Life Sciences
< 30 thousand Brazilian reais	Male	Pedro Miguel Ocampos Pedroso	Medicina Veterinária	Life Sciences
< 30 thousand Brazilian reais	Male	André Escobar	Medicina Veterinária	Life Sciences
< 30 thousand Brazilian reais	Male	Saulo Petinatti Pavarini	Medicina Veterinária	Life Sciences
< 30 thousand Brazilian reais	Male	Jenner Karlisson Pimenta dos Reis	Medicina Veterinária	Life Sciences
< 30 thousand Brazilian reais	Female	Marilia Martins Melo	Medicina Veterinária	Life Sciences
< 30 thousand Brazilian reais	Male	Jose Luiz Catao Dias	Medicina Veterinária	Life Sciences
< 30 thousand Brazilian reais	Female	Fernanda Silveira Flôres Vogel	Medicina Veterinária	Life Sciences
< 30 thousand Brazilian reais	Male	Alexandre de Magalhaes Vieira Machado	Medicina Veterinária	Life Sciences
< 30 thousand Brazilian reais	Male	Nelson Venturin	Recursos Florestais	Exact Sciences
< 30 thousand Brazilian reais	Male	Sebastião do Amaral Machado	Recursos Florestais	Exact Sciences
< 30 thousand Brazilian reais	Male	Paulo Yoshio Kageyama	Recursos Florestais	Exact Sciences
< 30 thousand Brazilian reais	Male	Solon Jonas Longhi	Recursos Florestais	Exact Sciences
< 30 thousand Brazilian reais	Male	Rubens Manoel dos Santos	Recursos Florestais	Exact Sciences
< 30 thousand Brazilian reais	Male	Luciano José Minette	Recursos Florestais	Exact Sciences
< 30 thousand Brazilian reais	Male	Alexandre Schiavetti	Recursos Florestais	Exact Sciences
< 30 thousand Brazilian reais	Male	Eduardo van den Berg	Recursos Florestais	Exact Sciences
< 30 thousand Brazilian reais	Male	Marcelo Luiz de Laia	Recursos Florestais	Exact Sciences
< 30 thousand Brazilian reais	Male	José Marcio de Mello	Recursos Florestais	Exact Sciences
< 30 thousand Brazilian reais	Male	Aristides Ribeiro	Recursos Florestais	Exact Sciences
< 30 thousand Brazilian reais	Male	Genesio Tamara Ribeiro	Recursos Florestais	Exact Sciences
< 30 thousand Brazilian reais	Female	Thelma Shirlen Soares	Recursos Florestais	Exact Sciences
< 30 thousand Brazilian reais	Male	Valdir Marcos Stefenon	Recursos Florestais	Exact Sciences
< 30 thousand Brazilian reais	Female	Edna Ursulino Alves	Recursos Florestais	Exact Sciences
< 30 thousand Brazilian reais	Female	Andreia da Silva Magaton	Recursos Florestais	Exact Sciences
< 30 thousand Brazilian reais	Male	Fabrício Jaques Sutili	Recursos Florestais	Exact Sciences
< 30 thousand Brazilian reais	Male	Gilciano Saraiva Nogueira	Recursos Florestais	Exact Sciences
< 30 thousand Brazilian reais	Female	Thannya Nascimento Soares	Recursos Florestais	Exact Sciences
< 30 thousand Brazilian reais	Male	Eduardo Pereira Cabral Gomes	Recursos Florestais	Exact Sciences
< 30 thousand Brazilian reais	Male	Evandro Novaes	Recursos Florestais	Exact Sciences
< 30 thousand Brazilian reais	Male	Luís Antônio Coimbra Borges	Recursos Florestais	Exact Sciences
< 30 thousand Brazilian reais	Female	Yule Roberta Ferreira Nunes	Recursos Florestais	Exact Sciences
< 30 thousand Brazilian reais	Male	Evandro Luiz Mendonca Machado	Recursos Florestais	Exact Sciences
< 30 thousand Brazilian reais	Male	Renato da Silva Vieira	Recursos Florestais	Exact Sciences
< 30 thousand Brazilian reais	Female	Rosilani Trianoski	Recursos Florestais	Exact Sciences
< 30 thousand Brazilian reais	Female	Marta Silvana Volpato Sccoti	Recursos Florestais	Exact Sciences
< 30 thousand Brazilian reais	Male	Laércio Antônio Gonçalves Jacovine	Recursos Florestais	Exact Sciences
< 30 thousand Brazilian reais	Female	Maria Luisa Lorscheitter	Botânica	Life Sciences
< 30 thousand Brazilian reais	Male	Orlando Necchi Junior	Botânica	Life Sciences
< 30 thousand Brazilian reais	Male	Juan Carlos Alvarez Pizarro	Botânica	Life Sciences
< 30 thousand Brazilian reais	Female	Edivani Villaron Franceschinelli	Botânica	Life Sciences
< 30 thousand Brazilian reais	Male	Francisco de Assis de Paiva Campos	Botânica	Life Sciences
< 30 thousand Brazilian reais	Female	Claudia Franca Barros	Botânica	Life Sciences
< 30 thousand Brazilian reais	Female	Tania Jacinto Freitas da Silva	Botânica	Life Sciences
< 30 thousand Brazilian reais	Female	Janette Palma Fett	Botânica	Life Sciences
< 30 thousand Brazilian reais	Male	Aristóteles Góes Neto	Botânica	Life Sciences
< 30 thousand Brazilian reais	Male	Osvaldo Ferrarese-Filho	Botânica	Life Sciences
< 30 thousand Brazilian reais	Male	Leonardo Rubi Rörig	Botânica	Life Sciences
< 30 thousand Brazilian reais	Male	João Aguiar Nogueira Batista	Botânica	Life Sciences
< 30 thousand Brazilian reais	Female	Cleusa Bona	Botânica	Life Sciences
< 30 thousand Brazilian reais	Female	Ariane Luna Peixoto	Botânica	Life Sciences
< 30 thousand Brazilian reais	Male	Paulo Henrique Labiak Evangelista	Botânica	Life Sciences
< 30 thousand Brazilian reais	Male	Jose Francisco Montenegro Valls	Botânica	Life Sciences
< 30 thousand Brazilian reais	Male	Sérgio de Melo	Botânica	Life Sciences
< 30 thousand Brazilian reais	Male	Gustavo Maia Souza	Botânica	Life Sciences
< 30 thousand Brazilian reais	Female	Regina Célia de Oliveira	Botânica	Life Sciences
< 30 thousand Brazilian reais	Male	Bruno Tomio Goto	Botânica	Life Sciences
< 30 thousand Brazilian reais	Male	Rafael Trevisan	Botânica	Life Sciences
< 30 thousand Brazilian reais	Male	Fernando Augusto de Oliveira e Silveira	Botânica	Life Sciences
< 30 thousand Brazilian reais	Male	João Ricardo Vieira Iganci	Botânica	Life Sciences
< 30 thousand Brazilian reais	Male	Antônio Gilberto Bertechini	Zootecnia	Life Sciences
< 30 thousand Brazilian reais	Female	Andrea Machado Leal Ribeiro	Zootecnia	Life Sciences
< 30 thousand Brazilian reais	Male	Robledo de Almeida Torres	Zootecnia	Life Sciences
< 30 thousand Brazilian reais	Female	Jaqueline Schneider Lemes	Zootecnia	Life Sciences
< 30 thousand Brazilian reais	Male	Jose Antonio Fregonesi	Zootecnia	Life Sciences
< 30 thousand Brazilian reais	Female	Maria de Fátima Ávila Pires	Zootecnia	Life Sciences
< 30 thousand Brazilian reais	Female	Angélica Signor Mendes	Zootecnia	Life Sciences
< 30 thousand Brazilian reais	Male	Julio Viégas	Zootecnia	Life Sciences
< 30 thousand Brazilian reais	Female	Maria Jose Hötzel	Zootecnia	Life Sciences
< 30 thousand Brazilian reais	Female	Maria Claudia Colla Ruvolo-Takasusuki	Zootecnia	Life Sciences
< 30 thousand Brazilian reais	Male	Marcos Jun-Iti Yokoo	Zootecnia	Life Sciences
< 30 thousand Brazilian reais	Male	Diego Barcelos Galvani	Zootecnia	Life Sciences
< 30 thousand Brazilian reais	Male	Alexandre de Mello Kessler	Zootecnia	Life Sciences
< 30 thousand Brazilian reais	Female	Carolina Bremm	Zootecnia	Life Sciences
< 30 thousand Brazilian reais	Male	Cesar Henrique Espirito Candal Poli	Zootecnia	Life Sciences
< 30 thousand Brazilian reais	Female	Laila Talarico Dias	Zootecnia	Life Sciences
< 30 thousand Brazilian reais	Female	Alice Eiko Murakami	Zootecnia	Life Sciences
< 30 thousand Brazilian reais	Female	Cristina Mattos Veloso	Zootecnia	Life Sciences
< 30 thousand Brazilian reais	Male	Henrique Mendonça Nunes Ribeiro Filho	Zootecnia	Life Sciences
< 30 thousand Brazilian reais	Male	José Humberto Vilar da Silva	Zootecnia	Life Sciences
< 30 thousand Brazilian reais	Male	Gherman Garcia Leal de Araujo	Zootecnia	Life Sciences
< 30 thousand Brazilian reais	Female	Lenira El Faro	Zootecnia	Life Sciences
< 30 thousand Brazilian reais	Male	Joao Teodoro Padua	Zootecnia	Life Sciences
< 30 thousand Brazilian reais	Male	Henrique Jorge Fernandes	Zootecnia	Life Sciences
< 30 thousand Brazilian reais	Female	Maria Eugênia Zerlotti Mercadante	Zootecnia	Life Sciences
< 30 thousand Brazilian reais	Male	Rogério Tubino Vianna	Zootecnia	Life Sciences
< 30 thousand Brazilian reais	Male	Rogério Martins Maurício	Zootecnia	Life Sciences
< 30 thousand Brazilian reais	Male	Marcio Machado Ladeira	Zootecnia	Life Sciences
< 30 thousand Brazilian reais	Female	Sandra Davi Traverso	Zootecnia	Life Sciences
< 30 thousand Brazilian reais	Female	Tatiana Carlesso dos Santos	Zootecnia	Life Sciences
< 30 thousand Brazilian reais	Male	Leandro Teixeira Barbosa	Zootecnia	Life Sciences
< 30 thousand Brazilian reais	Male	José Geraldo de Vargas Junior	Zootecnia	Life Sciences
< 30 thousand Brazilian reais	Male	Fabiano Alvim Barbosa	Zootecnia	Life Sciences
< 30 thousand Brazilian reais	Female	Kaliandra Souza Alves	Zootecnia	Life Sciences
< 30 thousand Brazilian reais	Female	Nadja Gomes Alves	Zootecnia	Life Sciences
< 30 thousand Brazilian reais	Male	Millor Fernandes do Rosário	Zootecnia	Life Sciences
< 30 thousand Brazilian reais	Male	Dimas Estrasulas de Oliveira	Zootecnia	Life Sciences
< 30 thousand Brazilian reais	Male	Américo Fróes Garcez Neto	Zootecnia	Life Sciences
< 30 thousand Brazilian reais	Female	Adalgiza Souza Carneiro de Rezende	Zootecnia	Life Sciences
< 30 thousand Brazilian reais	Male	Luciano Trevizan	Zootecnia	Life Sciences
< 30 thousand Brazilian reais	Female	Camila Celeste Brandão Ferreira Ítavo	Zootecnia	Life Sciences
< 30 thousand Brazilian reais	Male	Alexandre Oba	Zootecnia	Life Sciences
< 30 thousand Brazilian reais	Male	Luciano Hauschild	Zootecnia	Life Sciences
< 30 thousand Brazilian reais	Female	Odimari Pricila Pires do Prado	Zootecnia	Life Sciences
< 30 thousand Brazilian reais	Male	Rodrigo Garófallo Garcia	Zootecnia	Life Sciences
< 30 thousand Brazilian reais	Male	Gustavo Rezende Siqueira	Zootecnia	Life Sciences
< 30 thousand Brazilian reais	Male	Anderson de Moura Zanine	Zootecnia	Life Sciences
< 30 thousand Brazilian reais	Male	Manoel Eduardo Rozalino Santos	Zootecnia	Life Sciences
< 30 thousand Brazilian reais	Female	Erika Cristina Jorge	Zootecnia	Life Sciences
< 30 thousand Brazilian reais	Male	José Augusto Gomes Azevêdo	Zootecnia	Life Sciences
< 30 thousand Brazilian reais	Male	Marcos Inácio Marcondes	Zootecnia	Life Sciences
< 30 thousand Brazilian reais	Male	Dalton Henrique Pereira	Zootecnia	Life Sciences
< 30 thousand Brazilian reais	Male	André Gustavo Leão	Zootecnia	Life Sciences
< 30 thousand Brazilian reais	Male	Fernando Kuss	Zootecnia	Life Sciences
< 30 thousand Brazilian reais	Male	Arione Augusti Boligon	Zootecnia	Life Sciences
< 30 thousand Brazilian reais	Male	Márcio Vieira da Cunha	Zootecnia	Life Sciences
< 30 thousand Brazilian reais	Male	Douglas dos Santos Pina	Zootecnia	Life Sciences
< 30 thousand Brazilian reais	Male	Robério Rodrigues Silva	Zootecnia	Life Sciences
< 30 thousand Brazilian reais	Male	Márvio Lobão Teixeira de Abreu	Zootecnia	Life Sciences
< 30 thousand Brazilian reais	Male	Aya Sasa	Zootecnia	Life Sciences
< 30 thousand Brazilian reais	Male	Alexandre Rodrigo Mendes Fernandes	Zootecnia	Life Sciences
< 30 thousand Brazilian reais	Female	Marcia Mascarenhas Grise	Zootecnia	Life Sciences
< 30 thousand Brazilian reais	Male	Leonardo José Camargos Lara	Zootecnia	Life Sciences
< 30 thousand Brazilian reais	Male	Gilberto de Lima Macedo Junior	Zootecnia	Life Sciences
< 30 thousand Brazilian reais	Male	Eduardo Arruda Teixeira Lanna	Zootecnia	Life Sciences
< 30 thousand Brazilian reais	Male	Carlos Nabinger	Zootecnia	Life Sciences
< 30 thousand Brazilian reais	Male	Ricardo Alexandre Silva Pessoa	Zootecnia	Life Sciences
< 30 thousand Brazilian reais	Male	Evandro Fernandes de Lima	Geociências	Exact Sciences
< 30 thousand Brazilian reais	Male	Marcus Vinicius Dorneles Remus	Geociências	Exact Sciences
< 30 thousand Brazilian reais	Female	Ignez de Pinho Guimaraes	Geociências	Exact Sciences
< 30 thousand Brazilian reais	Male	Adejardo Francisco da Silva Filho	Geociências	Exact Sciences
< 30 thousand Brazilian reais	Male	Carlos Henrique Alexandrino	Geociências	Exact Sciences
< 30 thousand Brazilian reais	Male	Carlos Augusto Sommer	Geociências	Exact Sciences
< 30 thousand Brazilian reais	Male	Edison Vicente Oliveira	Geociências	Exact Sciences
< 30 thousand Brazilian reais	Female	Iracema Reimão Silva	Geociências	Exact Sciences
< 30 thousand Brazilian reais	Female	Maria de Fátima Aparecida Saraiva Bitencourt	Geociências	Exact Sciences
< 30 thousand Brazilian reais	Male	Aderson Farias do Nascimento	Geociências	Exact Sciences
< 30 thousand Brazilian reais	Male	Helio Radke Bittencourt	Geociências	Exact Sciences
< 30 thousand Brazilian reais	Male	Cláudio Wilson Mendes Júnior	Geociências	Exact Sciences
< 30 thousand Brazilian reais	Male	Eliseu Vieira Dias	Geociências	Exact Sciences
[truncated: 1,837 more rows]
